# Supplementary material for: Diversity, distribution and conservation of the terrestrial reptiles of Oman (Sauropsida, Squamata)
Source: PubMed Central journal article supplement (PMC5802441; doi:10.1371/journal.pone.0190389), 2018-02-07
Supplement: pone.0190389.s002.pdf [file pone.0190389.s002.pdf]

## **S2 Appendix. Atlas of the terrestrial reptiles of Oman**

Appendix showing photographs, distribution and ecology of all the 101 species of terrestrial reptiles of Oman included in the present study [S1–S101]; number of observations [S102]; species lists by governorate [S103–S116]; species lists by protected area [S117–S121]; all the species' distribution maps defined using minimum convex polygon (MCP) of the observations filtered by the species' average altitude [S122–S134], and a list of all the authors of the photographs (all of them authors of the manuscript).

**A HIGH-RESOLUTION VERSION OF THIS APPENDIX CAN BE  
DOWNLOADED FROM THE FOLLOWING WEB ADDRESS**

<http://purl.org/carranza/data>



## Index

|                                         |           |
|-----------------------------------------|-----------|
| <b>S1–S101: SPECIES INFORMATION</b>     | <b>8</b>  |
| <b>LIZARDS</b>                          | <b>9</b>  |
| <b>AGAMIDS</b>                          | <b>9</b>  |
| <b>Agamidae</b>                         | <b>9</b>  |
| <i>Acanthocercus adramitanus</i>        | 9         |
| <i>Calotes versicolor</i>               | 10        |
| <i>Phrynocephalus arabicus</i>          | 11        |
| <i>Phrynocephalus maculatus</i>         | 12        |
| <i>Phrynocephalus sakoi</i>             | 13        |
| <i>Pseudotrapelus dhofarensis</i>       | 14        |
| <i>Pseudotrapelus jensvindumi</i>       | 15        |
| <i>Trapelus flavimaculatus</i>          | 16        |
| <i>Uromastyx aegyptia leptieni</i>      | 17        |
| <i>Uromastyx aegyptia microlepis</i>    | 18        |
| <i>Uromastyx benti</i>                  | 19        |
| <i>Uromastyx thomasi</i>                | 20        |
| <b>Chamaeleonidae</b>                   | <b>21</b> |
| <i>Chamaeleo arabicus</i>               | 21        |
| <b>GECKOS</b>                           | <b>23</b> |
| <b>Gekkonidae</b>                       | <b>23</b> |
| <i>Bunopus tuberculatus</i>             | 22        |
| <i>Cyrtopodion scabrum</i>              | 23        |
| <i>Hemidactylus alkiyumii</i>           | 24        |
| <i>Hemidactylus endophis</i>            | 25        |
| <i>Hemidactylus festivus</i>            | 26        |
| <i>Hemidactylus flaviviridis</i>        | 27        |
| <i>Hemidactylus hajarensis</i>          | 28        |
| <i>Hemidactylus inexpectatus</i>        | 29        |
| <i>Hemidactylus lemurinus</i>           | 30        |
| <i>Hemidactylus leschenaultii</i>       | 31        |
| <i>Hemidactylus luqueorum</i>           | 32        |
| <i>Hemidactylus masirahensis</i>        | 33        |
| <i>Hemidactylus minutus</i>             | 34        |
| <i>Hemidactylus paucituberculatus</i>   | 35        |
| <i>Hemidactylus persicus</i>            | 36        |
| <i>Hemidactylus robustus</i>            | 37        |
| <i>Hemidactylus</i> sp.                 | 38        |
| <i>Pseudoceramodactylus khobarensis</i> | 39        |
| <i>Stenodactylus arabicus</i>           | 40        |
| <i>Stenodactylus doriae</i>             | 41        |
| <i>Stenodactylus leptocosymbotes</i>    | 42        |
| <i>Stenodactylus sharqiyahensis</i>     | 43        |
| <i>Trachydactylus hajarensis</i>        | 44        |
| <i>Trachydactylus spatalurus</i>        | 45        |
| <i>Tropicolotes scortecchi</i>          | 46        |
| <i>Tropicolotes</i> sp.                 | 47        |
| <b>Phyllodactylidae</b>                 | <b>48</b> |
| <i>Asaccus gallagheri</i>               | 48        |
| <i>Asaccus gardneri</i>                 | 49        |
| <i>Asaccus margaritae</i>               | 50        |
| <i>Asaccus montanus</i>                 | 51        |
| <i>Asaccus platyrhynchus</i>            | 52        |
| <i>Asaccus arnoldi</i>                  | 53        |
| <i>Ptyodactylus dhofarensis</i>         | 54        |
| <i>Ptyodactylus orlovi</i>              | 55        |
| <i>Ptyodactylus ruusaljibalicus</i>     | 56        |
| <b>Sphaerodactylidae</b>                | <b>57</b> |
| <i>Pristurus carteri</i>                | 57        |
| <i>Pristurus celerrimus</i>             | 58        |
| <i>Pristurus gallagheri</i>             | 59        |
| <i>Pristurus minimus</i>                | 60        |
| <i>Pristurus rupestris rupestris</i>    | 61        |
| <i>Pristurus</i> sp. 1                  | 62        |

|                                          |            |
|------------------------------------------|------------|
| <i>Pristurus</i> sp. 2                   | 63         |
| <i>Pristurus</i> sp. 3                   | 64         |
| <i>Pristurus</i> sp. 4                   | 65         |
| <i>Pristurus</i> sp. 5                   | 66         |
| <b>LACERTIDS</b>                         | <b>67</b>  |
| <b>Lacertidae</b>                        | <b>67</b>  |
| <i>Acanthodactylus blanfordii</i>        | 67         |
| <i>Acanthodactylus boskianus</i>         | 68         |
| <i>Acanthodactylus felicis</i>           | 69         |
| <i>Acanthodactylus haasi</i>             | 70         |
| <i>Acanthodactylus masirae</i>           | 71         |
| <i>Acanthodactylus opheodurus</i>        | 72         |
| <i>Acanthodactylus schmidtii</i>         | 73         |
| <i>Mesalina adramitana</i>               | 74         |
| <i>Mesalina ayunensis</i>                | 75         |
| <i>Mesalina</i> sp. 1                    | 76         |
| <i>Mesalina</i> sp. 2                    | 77         |
| <i>Omanosaura cyanura</i>                | 78         |
| <i>Omanosaura jayakari</i>               | 79         |
| <b>SKINKS</b>                            | <b>81</b>  |
| <b>Scincidae</b>                         | <b>81</b>  |
| <i>Ablepharus pannonicus</i>             | 80         |
| <i>Chalcides ocellatus ocellatus</i>     | 81         |
| <i>Heremites septemtaeniatus</i>         | 82         |
| <i>Scincus mitranus</i>                  | 83         |
| <i>Scincus scincus conirostris</i>       | 84         |
| <i>Trachylepis brevicollis</i>           | 85         |
| <i>Trachylepis tessellata</i>            | 86         |
| <b>AMPHISBAENIDS</b>                     | <b>87</b>  |
| <b>Trogonophidae</b>                     | <b>87</b>  |
| <i>Diplometopon zarudnyi</i>             | 87         |
| <b>VARANIDS</b>                          | <b>88</b>  |
| <b>Varanidae</b>                         | <b>88</b>  |
| <i>Varanus griseus</i>                   | 88         |
| <b>SNAKES</b>                            | <b>89</b>  |
| <b>Boidae</b>                            | <b>89</b>  |
| <i>Eryx jayakari</i>                     | 89         |
| <b>Colubridae</b>                        | <b>91</b>  |
| <i>Lytorhynchus diadema diadema</i>      | 90         |
| <i>Platyceps rhodorachis rhodorachis</i> | 91         |
| <i>Platyceps thomasi</i>                 | 92         |
| <i>Rhynchocalamus arabicus</i>           | 93         |
| <i>Spalerosophis diadema cliffordii</i>  | 94         |
| <i>Telescopus dhara dhara</i>            | 95         |
| <b>Elapidae</b>                          | <b>96</b>  |
| <i>Naja arabica</i>                      | 96         |
| <b>Lamprophiidae</b>                     | <b>97</b>  |
| <i>Atractaspis andersonii</i>            | 97         |
| <i>Psammophis schokari</i>               | 98         |
| <i>Rhagerhis moilensis</i>               | 99         |
| <b>Leptotyphlopidae</b>                  | <b>101</b> |
| <i>Myriopholis macrorhyncha</i>          | 100        |
| <i>Myriopholis nursii</i>                | 101        |
| <b>Typhlopidae</b>                       | <b>102</b> |
| <i>Indotyphlops braminus</i>             | 102        |
| <b>Viperidae</b>                         | <b>103</b> |
| <i>Bitis arietans</i>                    | 103        |
| <i>Cerastes gasperettii gasperettii</i>  | 104        |
| <i>Echis carinatus sochureki</i>         | 105        |
| <i>Echis coloratus</i>                   | 106        |
| <i>Echis khosatzkii</i>                  | 107        |
| <i>Echis omanensis</i>                   | 108        |
| <i>Pseudocerastes persicus</i>           | 109        |

|                                                                                                                                                                         |            |
|-------------------------------------------------------------------------------------------------------------------------------------------------------------------------|------------|
| <b>S102: TOTAL NUMBER OF OBSERVATIONS</b> .....                                                                                                                         | <b>112</b> |
| <b>S103-S116: SPECIES LISTS OF OMAN</b> .....                                                                                                                           | <b>116</b> |
| <b>Oman</b> .....                                                                                                                                                       | <b>118</b> |
| Musandam Governorate .....                                                                                                                                              | 120        |
| Al Buraymi Governorate .....                                                                                                                                            | 121        |
| Al Batinah North Governorate .....                                                                                                                                      | 122        |
| Al Batinah South Governorate .....                                                                                                                                      | 123        |
| Adh Dhahirah Governorate .....                                                                                                                                          | 124        |
| Ad Dakhliyyah Governorate .....                                                                                                                                         | 125        |
| Muscat Governorate .....                                                                                                                                                | 126        |
| Ash Sharqiyyah North Governorate .....                                                                                                                                  | 127        |
| Ash Sharqiyyah South Governorate .....                                                                                                                                  | 128        |
| Al Wusta Governorate .....                                                                                                                                              | 130        |
| Dhofar Governorate .....                                                                                                                                                | 131        |
| <b>S117-S121: SPECIES LISTS BY PROTECTED AREA</b> .....                                                                                                                 | <b>134</b> |
| Protected areas of Oman .....                                                                                                                                           | 135        |
| Dimaniyat Islands, Al Qurum Ramsar Site, Al Khawari, Jebel Akhdar, Al Sareen & Ras Al Shajer .....                                                                      | 136        |
| Al Saleel, Turtle Reserve & Jebel Qahwan .....                                                                                                                          | 137        |
| Al Wusta Wetland Reserve, Al Wusta Wildlife Sanctuary & Jabal Samhan .....                                                                                              | 138        |
| Khawr Rawri, Khawr Taqah, Khawr Sawli, Khawr Dahareez, Khawr Baleed, Khawr Salalah,<br>Khawr Awqad, Khawr Qurum Al Kabeer, Khawr Qurum Al Sagher & Khawr Mughsayi ..... | 139        |
| <b>S122-S134: MAPS OF SPECIES' DISTRIBUTION DEFINED USING MINIMUM CONVEX<br/>POLYGONS</b> .....                                                                         | <b>142</b> |
| <b>S135: AUTHORS OF THE PHOTOGRAPHS</b> .....                                                                                                                           | <b>158</b> |



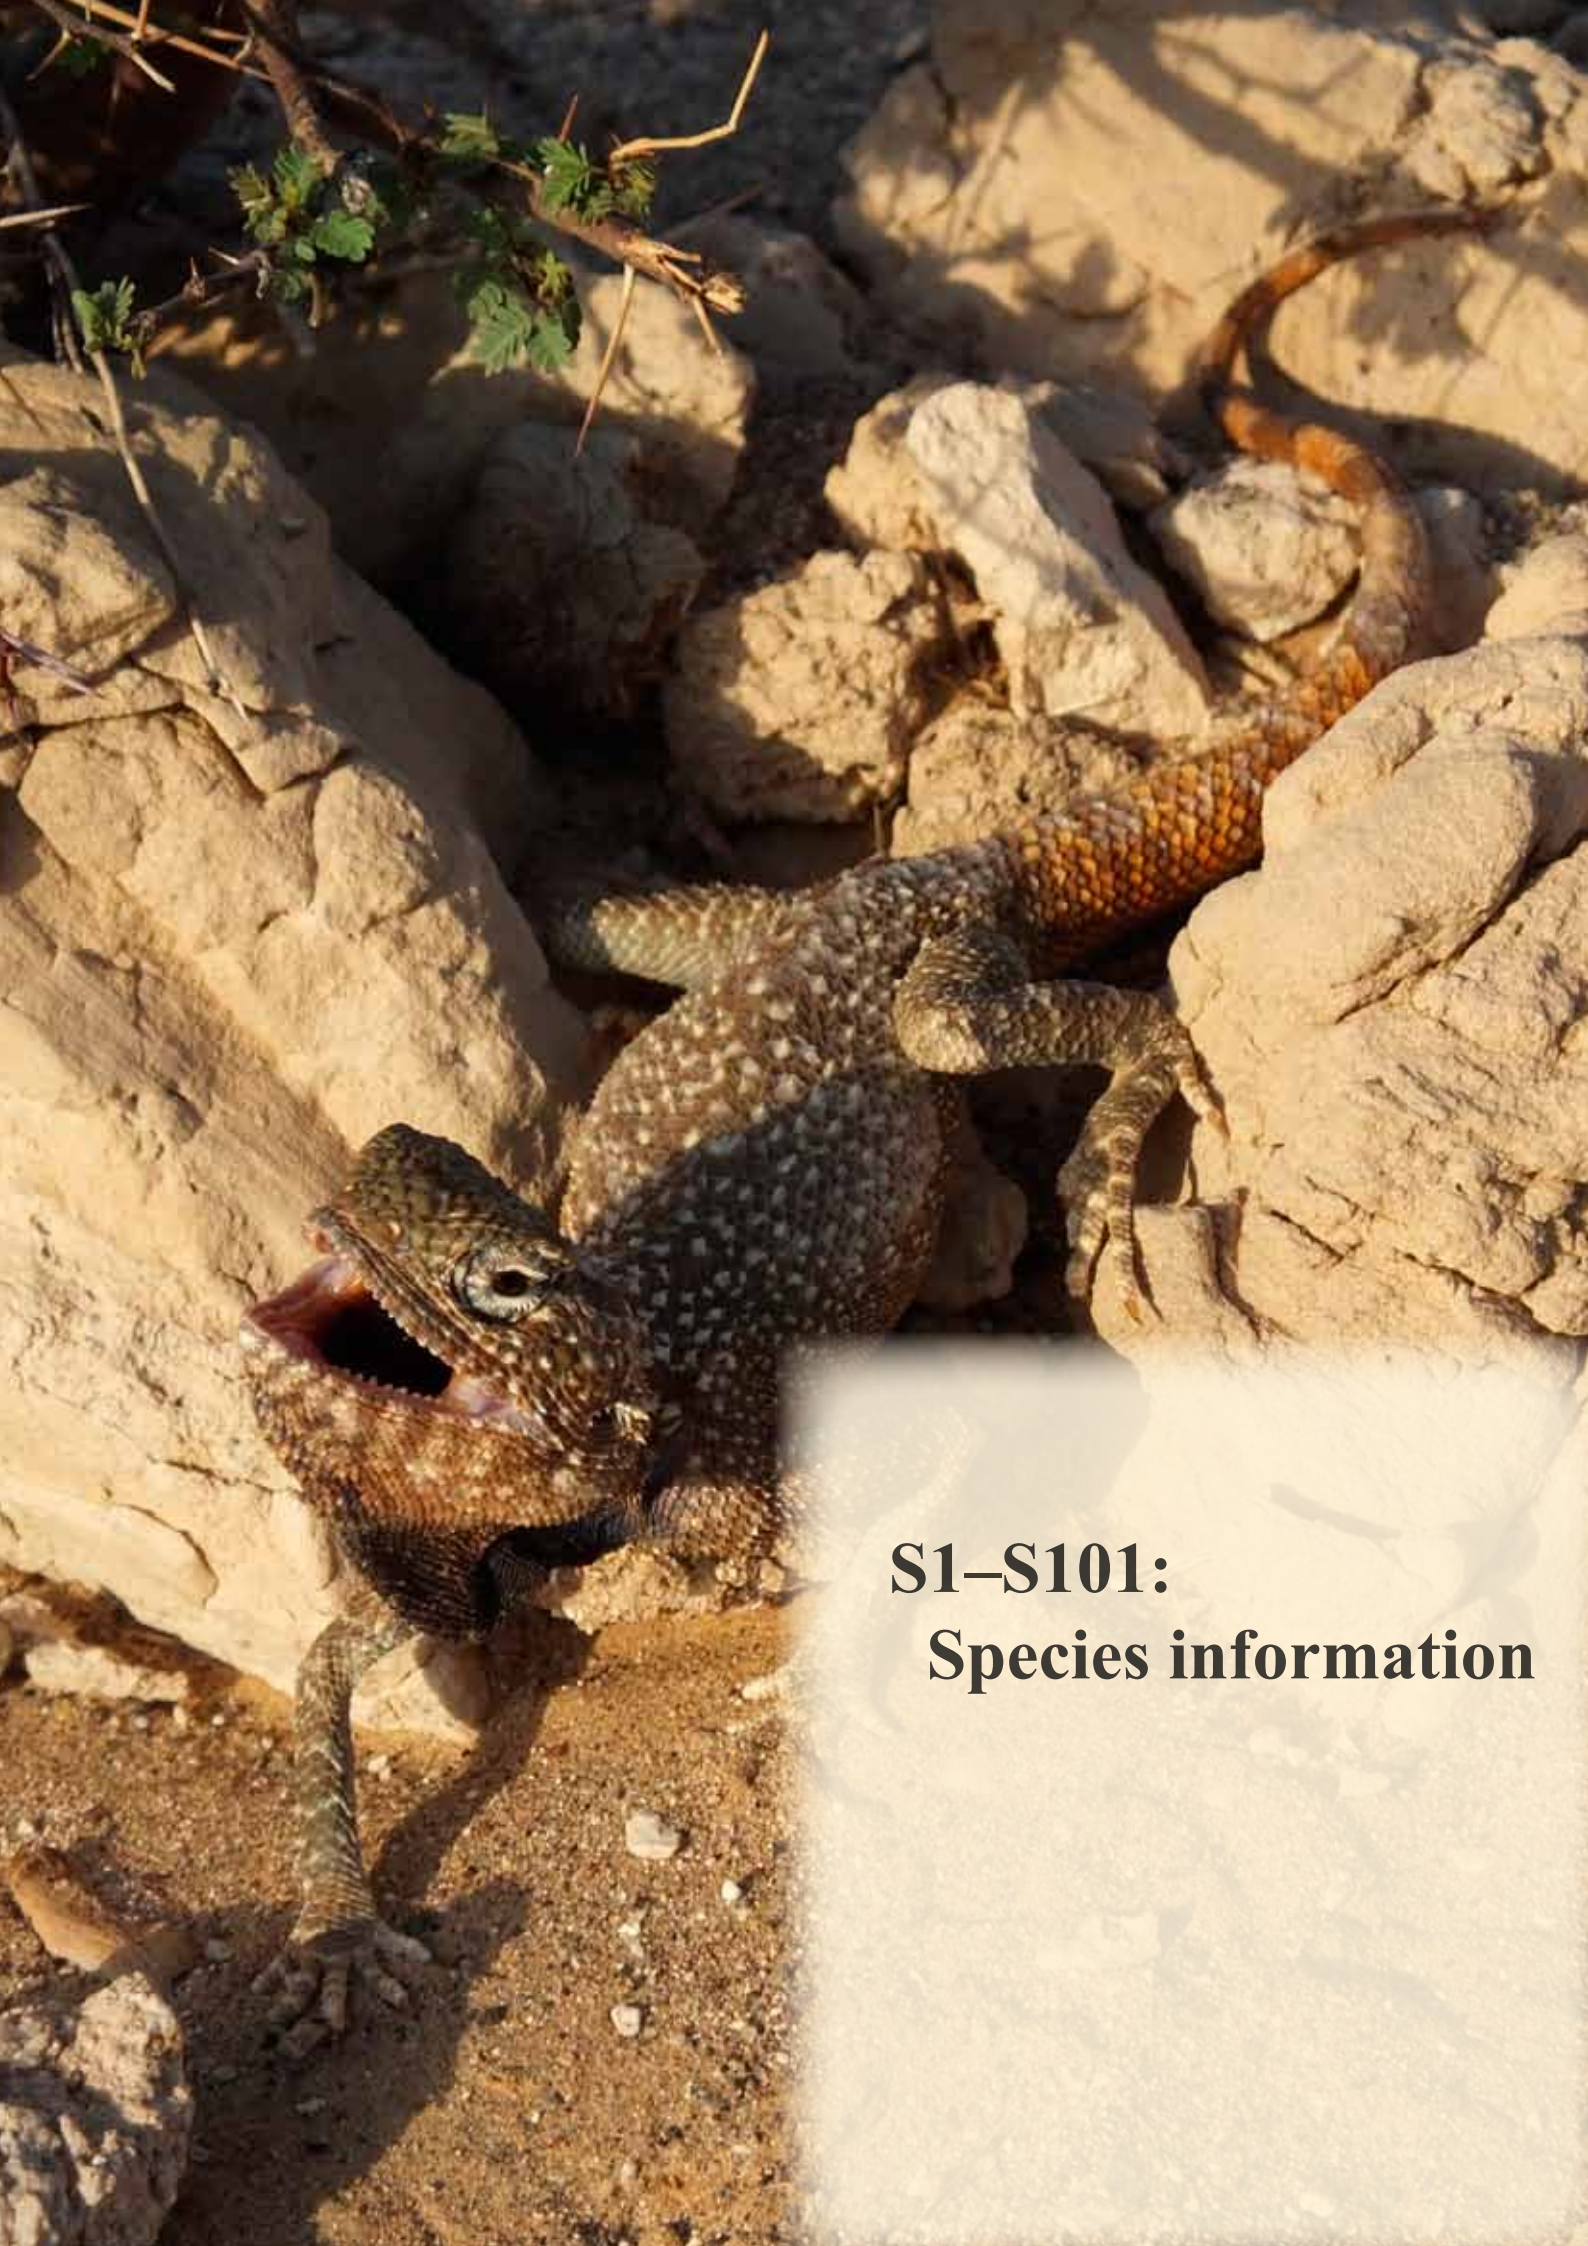

**S1–S101:  
Species information**

## S1–S101: Species information

There is a separate plate for each one of the 101 species. Each plate contains the species name and authority (except undescribed species) and the following items:

- A) picture of the species
- B) distribution map with observations (red dots) at a scale of 10 arc-minutes (~18 km)
- C) table with some useful information
- D) graph of the elevation frequency at 100 m intervals
- E) two-dimensional climatic space of Oman (grey dots) defined by total annual precipitation (BIO12) and mean annual temperature (BIO1) with red dots representing the species distribution

F) Boxplot of Land Cover distances (see Fig. 3C for the Land Cover map). TO (Tree Open); C (Cropland); COVM (Cropland / Other vegetation mosaic); S (Shrub); H (Herbaceous); SV (Sparse Vegetation); BAGR (Bare Areas Gravel Rock); BAS (Bare Areas Sand); U (Urban). The top of the rectangle indicates the third quartile, a horizontal line near the middle of the rectangle indicates the median, and the bottom of the rectangle indicates the first quartile. The vertical line extending from the top of the rectangle indicates the maximum value, and another vertical line extending from the bottom of the rectangle indicates the minimum value. Empty circles represent outliers.

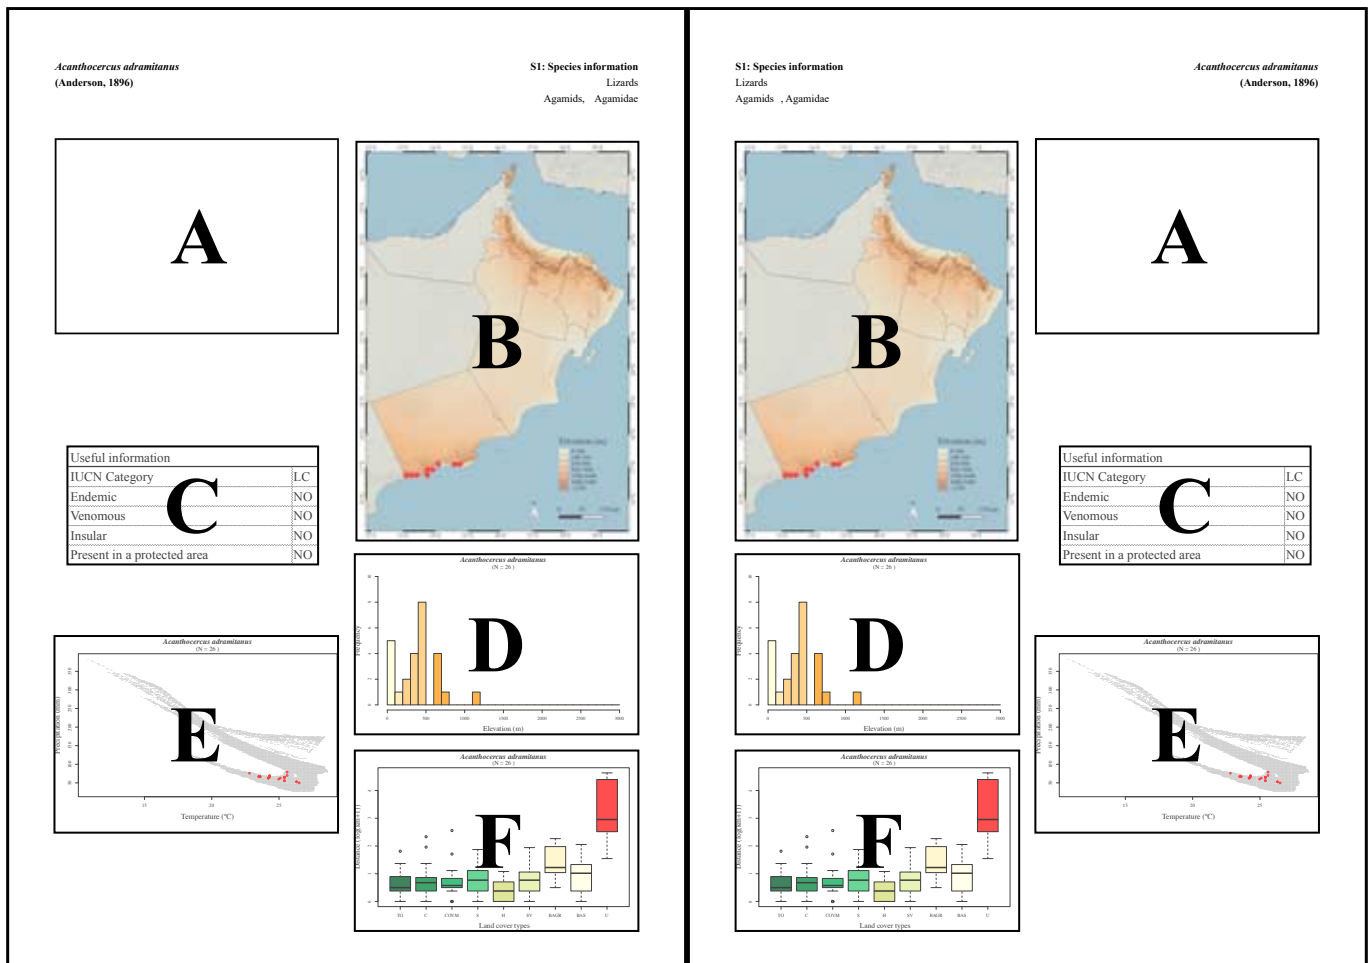



**S1: Species information**

Lizards

Agamids, Agamidae

*Acanthocercus adramitanus*  
(Anderson, 1896)

**B**

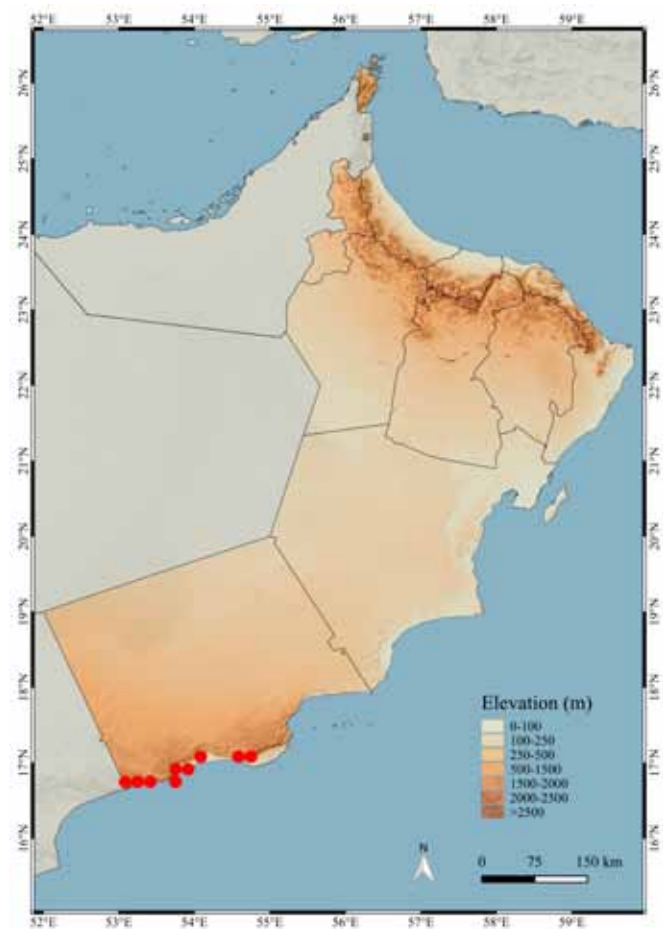

**A**

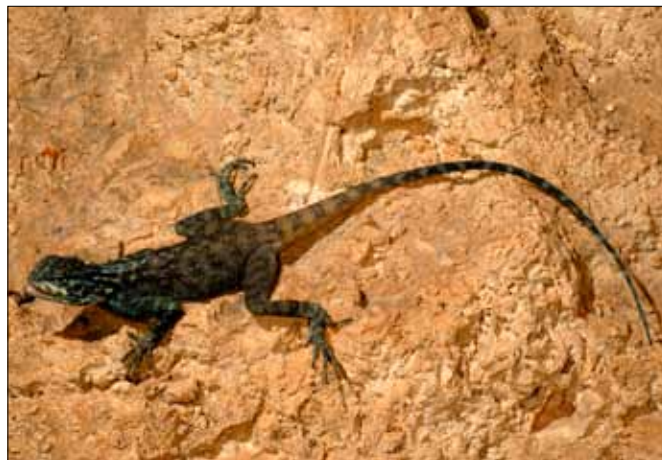

**C**

Useful information

|                             |    |
|-----------------------------|----|
| IUCN Category               | LC |
| Endemic                     | NO |
| Venomous                    | NO |
| Insular                     | NO |
| Present in a protected area | NO |

**D**

*Acanthocercus adramitanus*  
(N = 26)

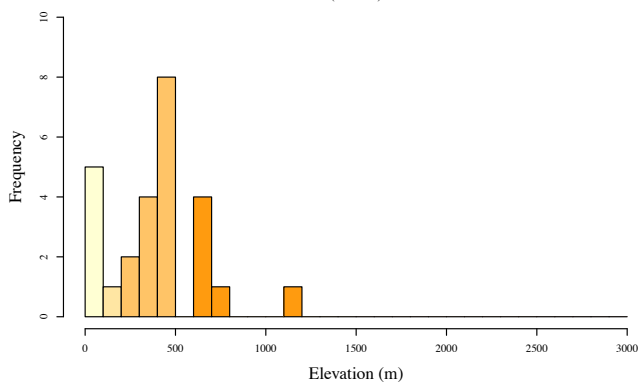

**F**

*Acanthocercus adramitanus*  
(N = 26)

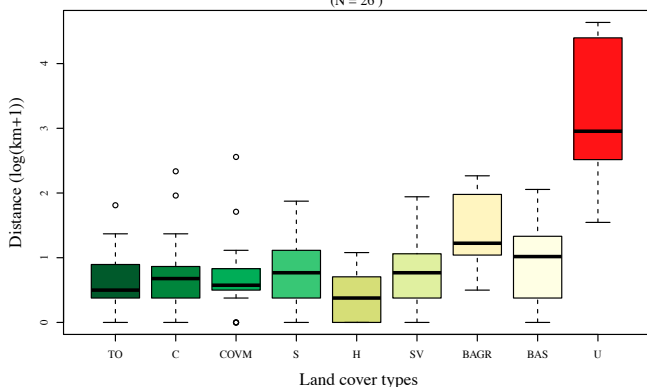

**E**

*Acanthocercus adramitanus*  
(N = 26)

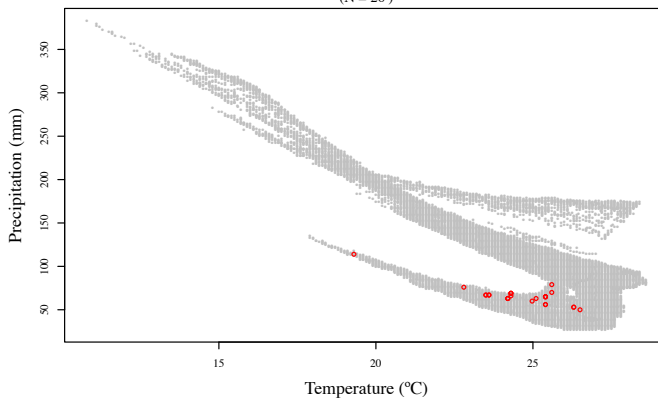

Lizards

Agamids

Geckos

Lacertids

Skinks

Amphisbaenids

Varamids

Snakes

Boidae

Colubridae

Elapidae

Lamprophiidae

Leptotyphlopidae

Typhlopidae

Viperidae

- Lizards
- Agamids
- Geckos
- Lacertids
- Skinks
- Amphisbaenids
- Varanids
- Snakes
- Boidae
- Colubridae
- Elapidae
- Lamprophiidae
- Leptotyphlopidae
- Typhlopidae
- Viperidae

***Calotes versicolor***  
(Daudin, 1802)

**S2: Species information**

Lizards  
Agamids, Agamidae

A

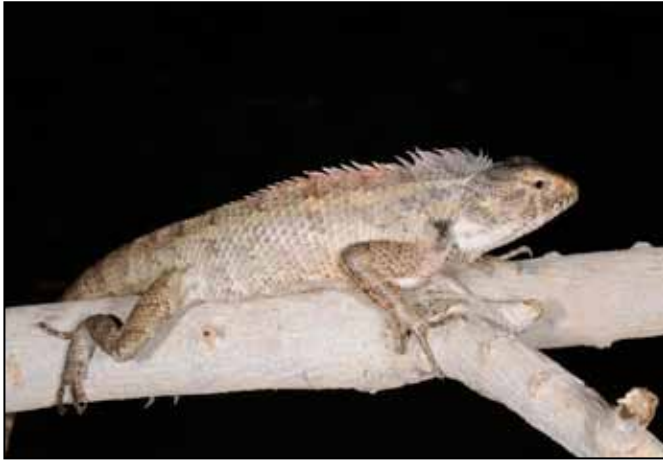

B

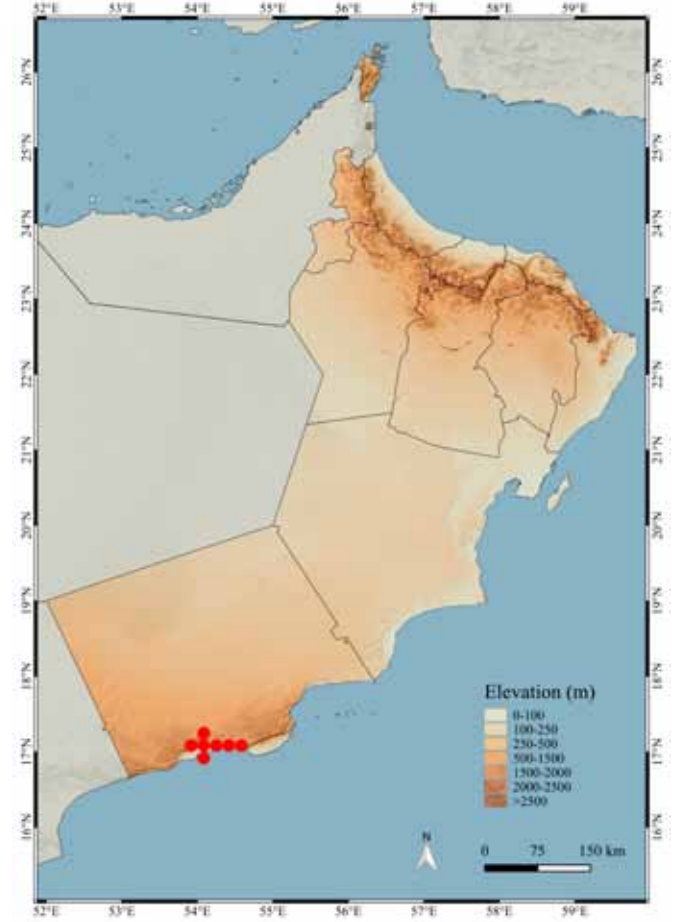

C

Useful information

|                             |     |
|-----------------------------|-----|
| IUCN Category               | LC* |
| Endemic                     | NO  |
| Venomous                    | NO  |
| Insular                     | NO  |
| Present in a protected area | NO  |

\*Not available on the web

D

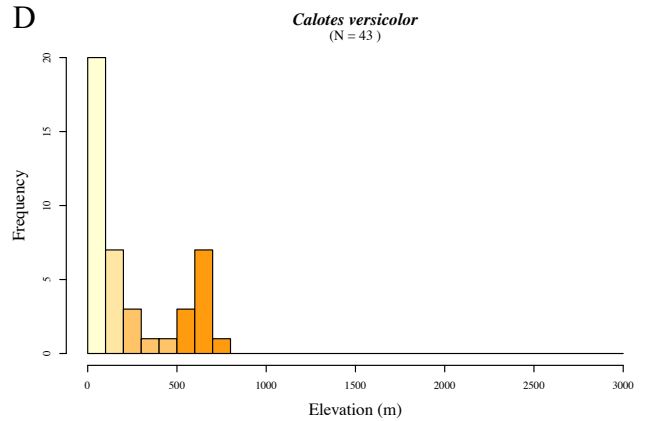

E

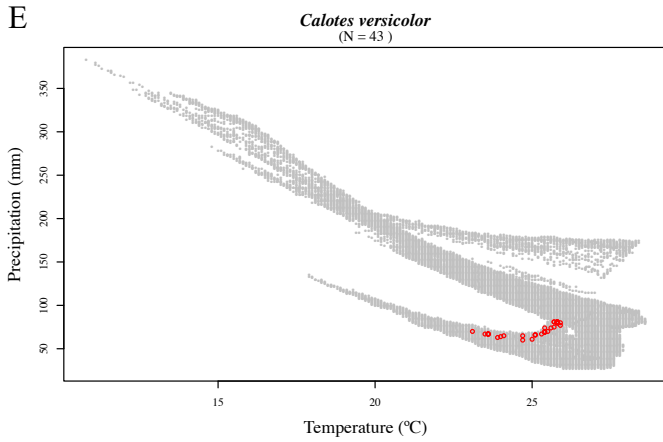

F

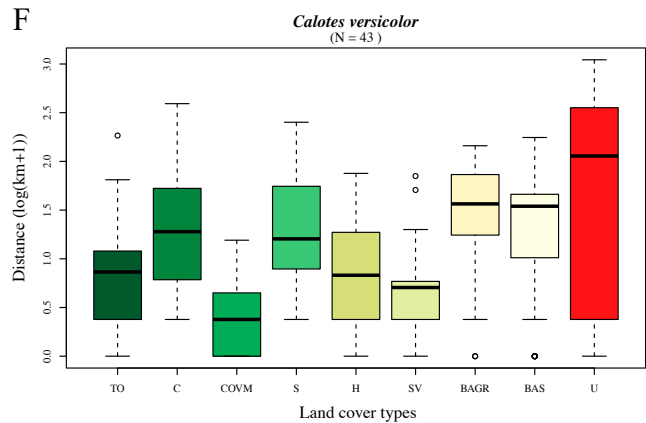

**S3: Species information**

Lizards

Agamids, Agamidae

***Phrynocephalus arabicus***  
(Anderson, 1894)

**B**

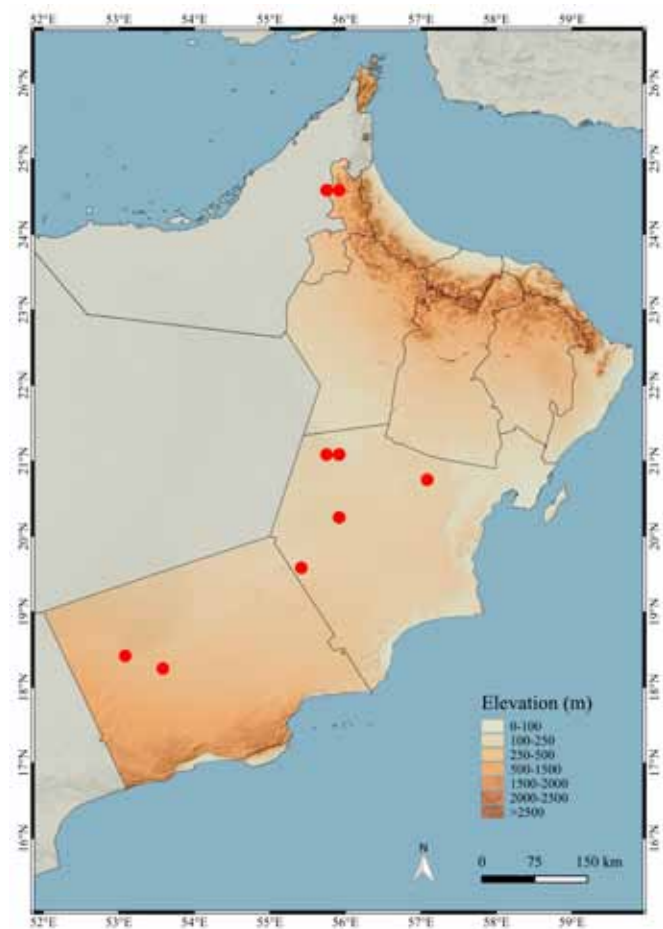

**A**

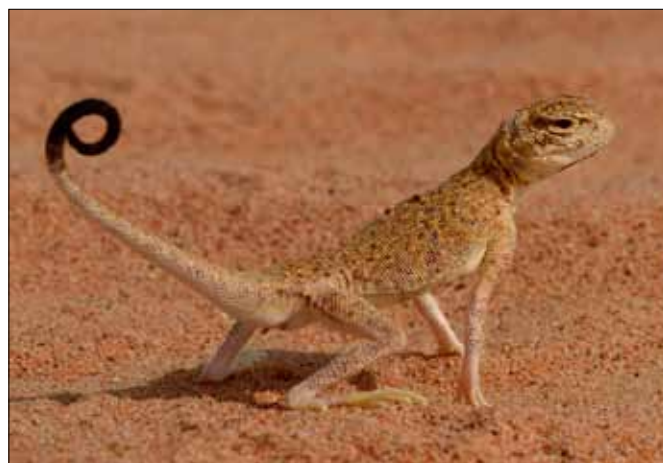

**C**

Useful information

|                             |    |
|-----------------------------|----|
| IUCN Category               | LC |
| Endemic                     | NO |
| Venomous                    | NO |
| Insular                     | NO |
| Present in a protected area | NO |

**D**

*Phrynocephalus arabicus*  
(N = 18)

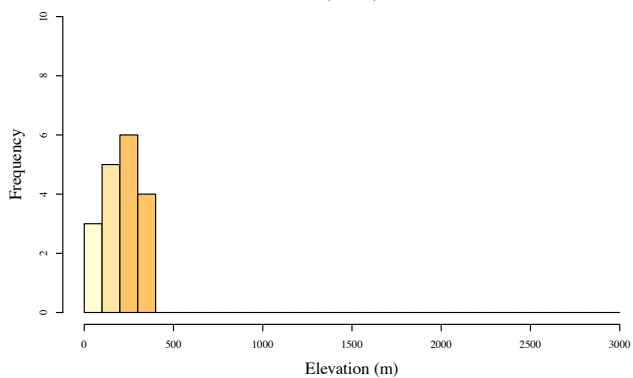

**F**

*Phrynocephalus arabicus*  
(N = 18)

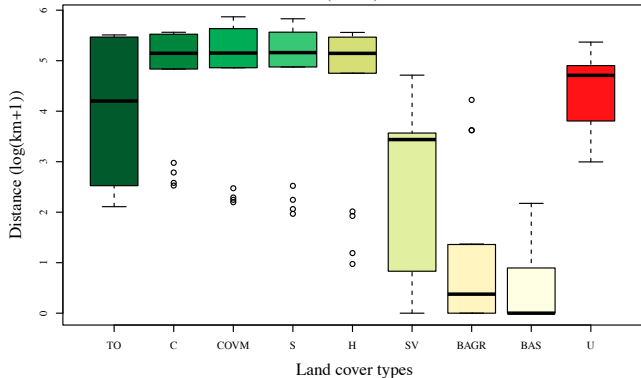

**E**

*Phrynocephalus arabicus*  
(N = 18)

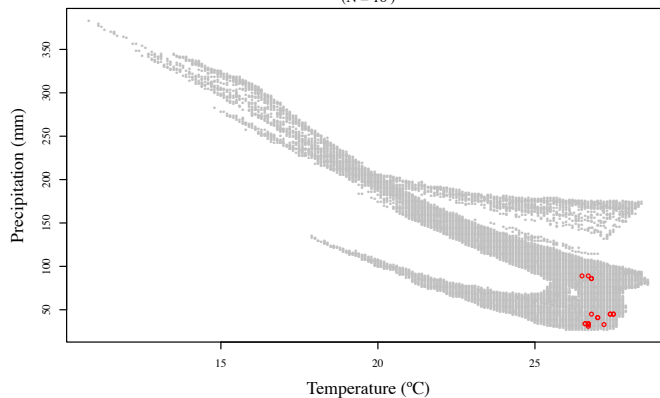

- Lizards
- Agamids
- Geckos
- Lacertids
- Skinks
- Amphisbaenids
- Varamids
- Snakes
- Boidae
- Colubridae
- Elapidae
- Lamprophiidae
- Leptotyphlopidae
- Typhlopidae
- Viperidae

***Phrynocephalus maculatus***  
Anderson, 1872

**S4: Species information**  
Lizards  
Agamids, Agamidae

A

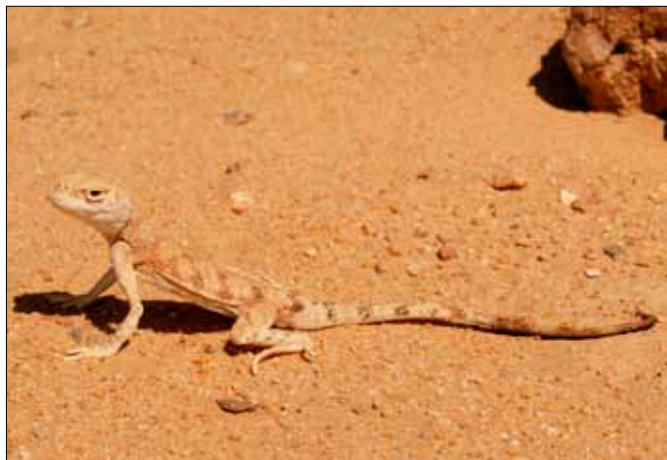

B

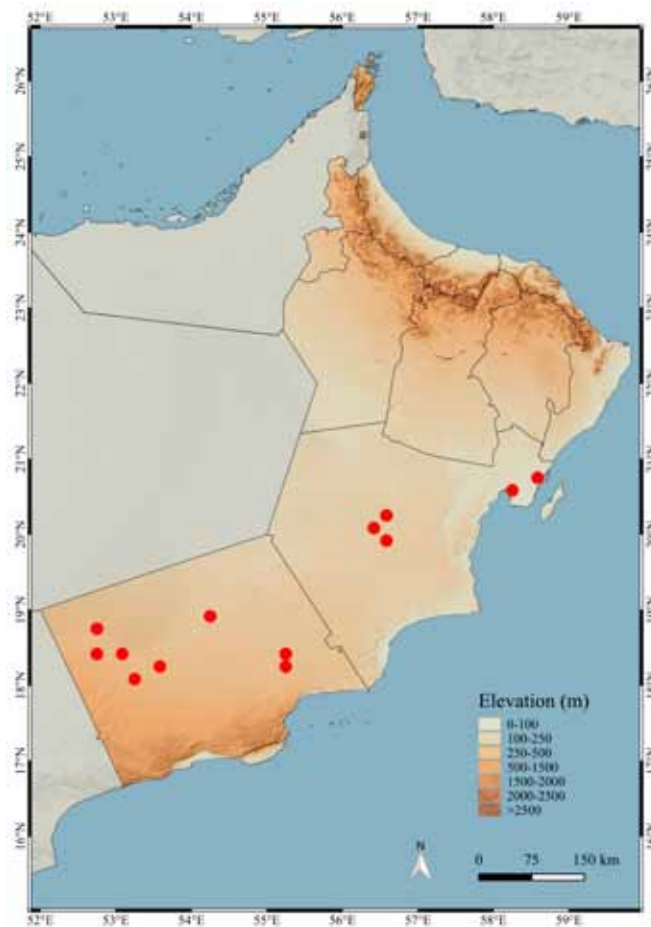

C

Useful information

|                             |     |
|-----------------------------|-----|
| IUCN Category               | LC* |
| Endemic                     | NO  |
| Venomous                    | NO  |
| Insular                     | NO  |
| Present in a protected area | YES |

\*Not available on the web

D

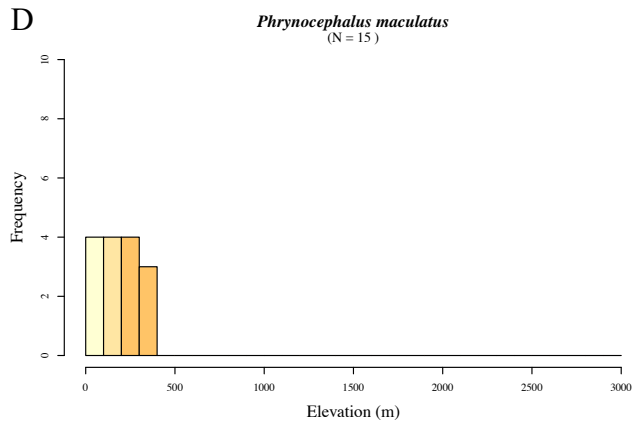

E

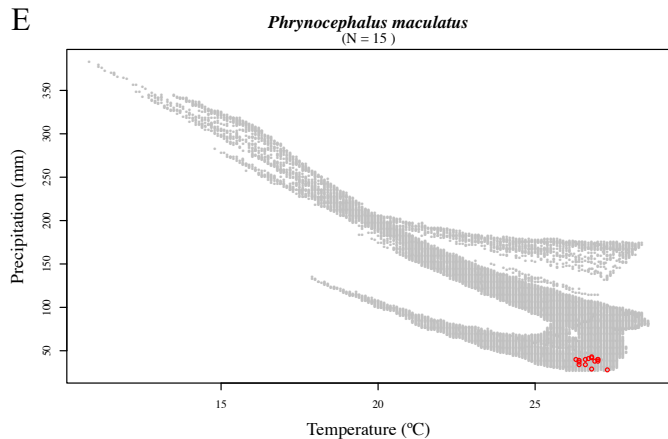

F

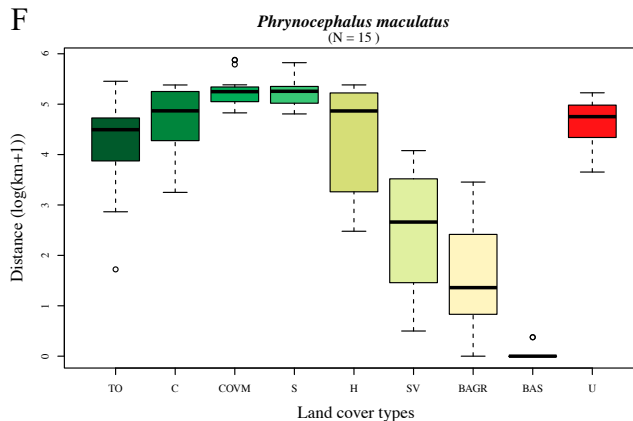

- Lizards
- Agamids
- Geckos
- Lacertids
- Skinks
- Amphisbaenids
- Varanids
- Snakes
- Boidae
- Colubridae
- Elapidae
- Lamprophiidae
- Leptotyphlopidae
- Typhlopidae
- Viperidae

**S5: Species information**

Lizards  
Agamids, Agamidae

*Phrynocephalus sakoi*  
Melnikov, Melnikova, Nazarov, Al-Johany &  
Ananjeva, 2015

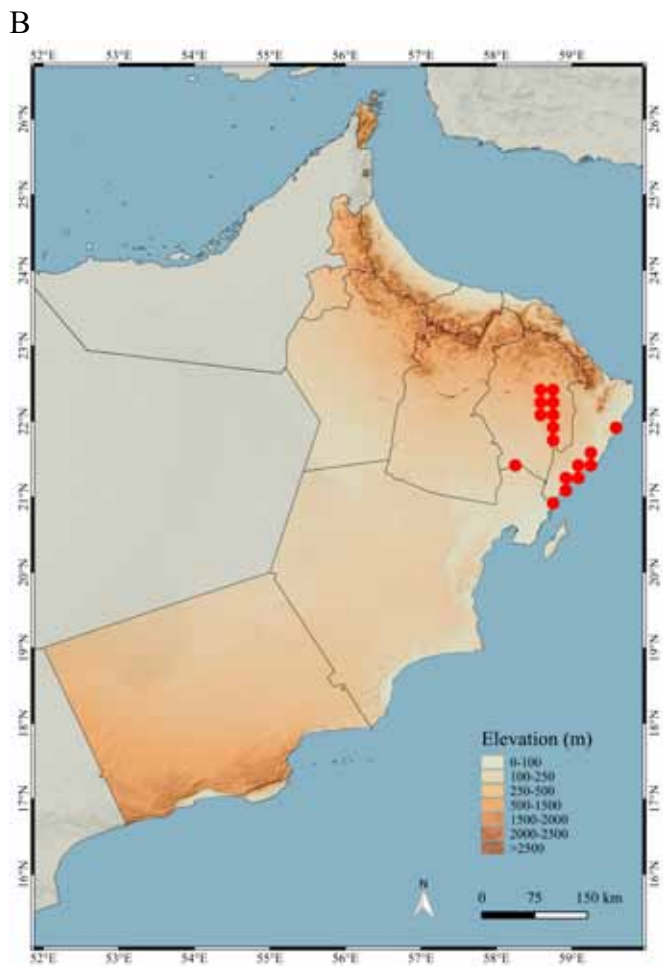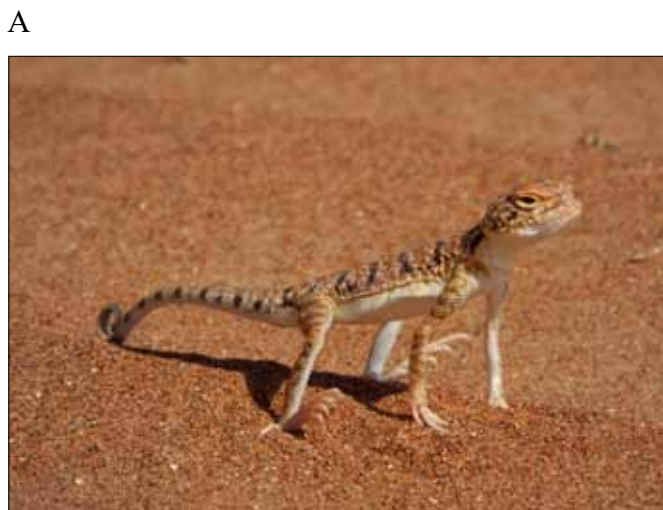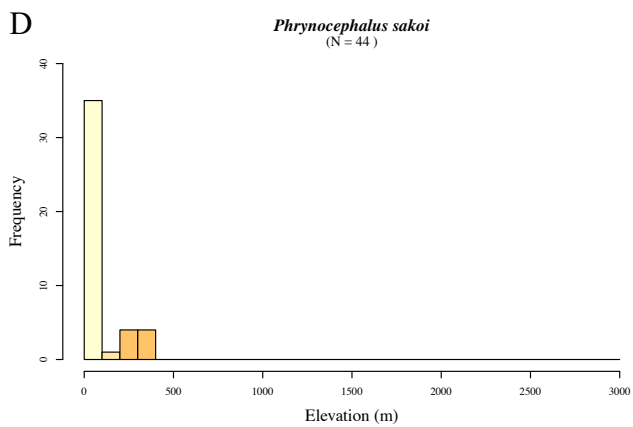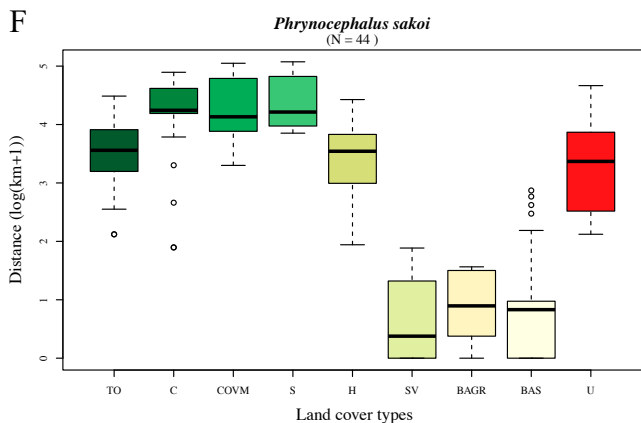

**C**

Useful information

|                             |     |
|-----------------------------|-----|
| IUCN Category               | NE  |
| Endemic                     | YES |
| Venomous                    | NO  |
| Insular                     | NO  |
| Present in a protected area | YES |

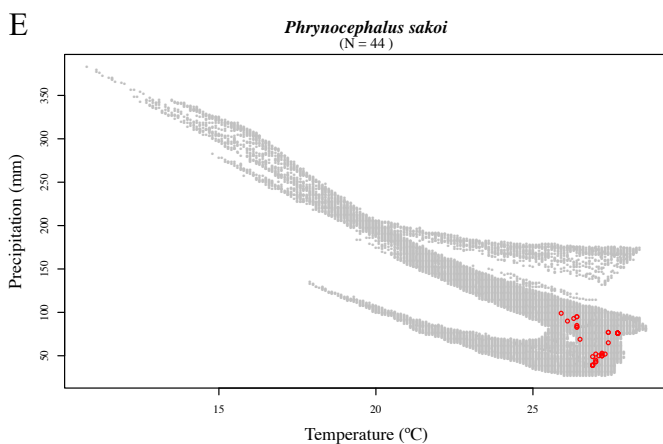

- Lizards
- Agamids
- Geckos
- Lacertids
- Skinks
- Amphisbaenids
- Varamids
- Snakes
- Boidae
- Colubridae
- Elapidae
- Lamprophiidae
- Leptotyphlopidae
- Typhlopidae
- Viperidae

***Pseudotrapelus dhofarensis***  
**Melnikov & Pierson, 2012**

**S6: Species information**

Lizards

Agamids, Agamidae

A

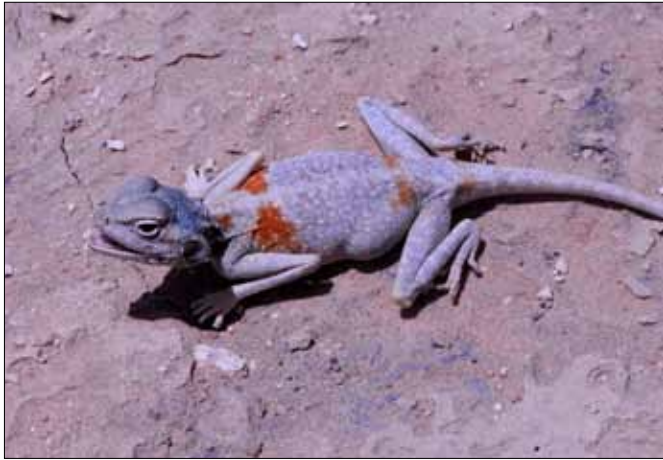

B

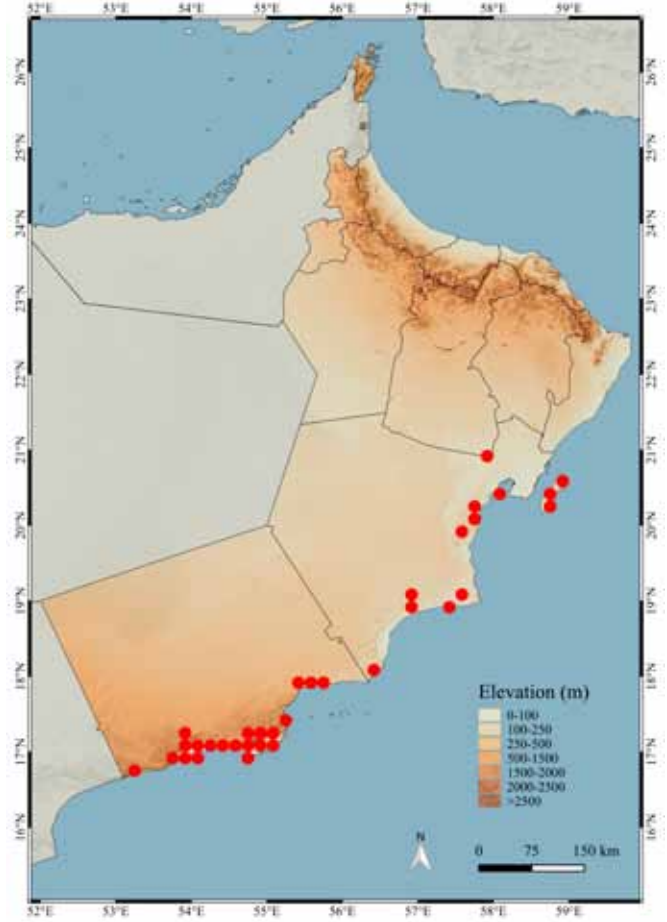

C

Useful information

|                             |     |
|-----------------------------|-----|
| IUCN Category               | NE  |
| Endemic                     | NO  |
| Venomous                    | NO  |
| Insular                     | YES |
| Present in a protected area | YES |

D

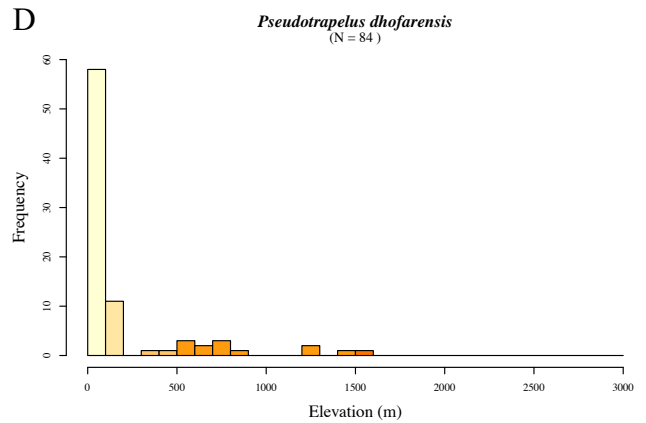

E

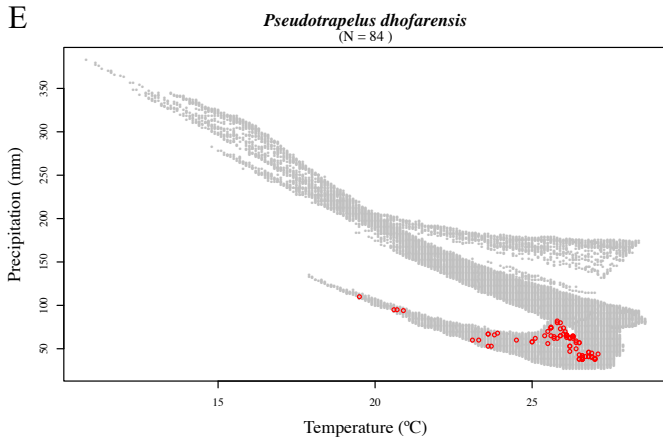

F

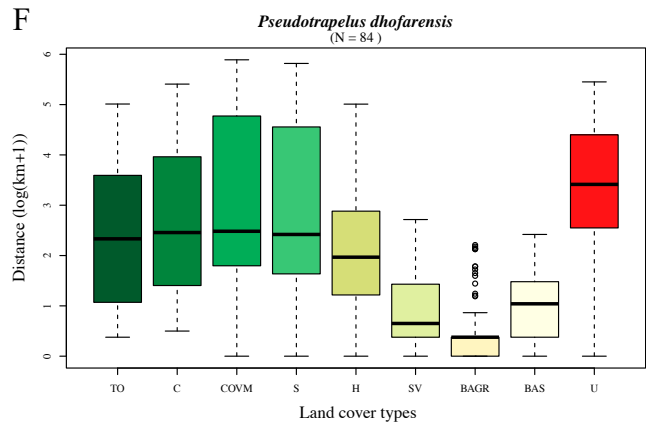

- Lizards
- Agamids
- Geckos
- Lacertids
- Skinks
- Amphisbaenids
- Varanids
- Snakes
- Boidae
- Colubridae
- Elapidae
- Lamprophiidae
- Leptotyphlopidae
- Typhlopidae
- Viperidae

**S7: Species information**

Lizards

Agamids, Agamidae

***Pseudotrapelus jensvindumi***  
Melnikov, Ananjeva & Papenfuss, 2013

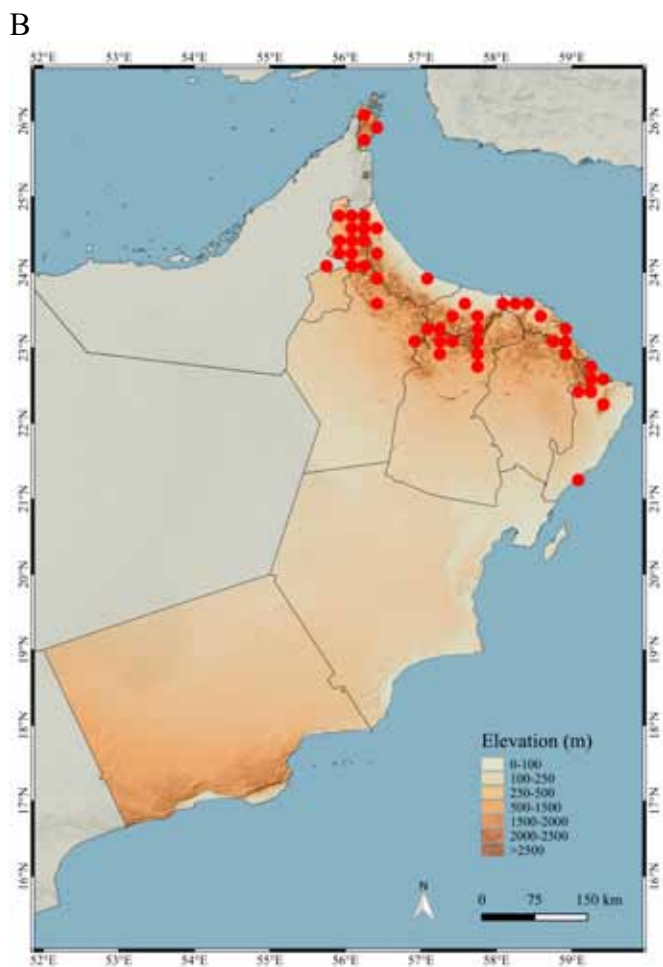

**A**

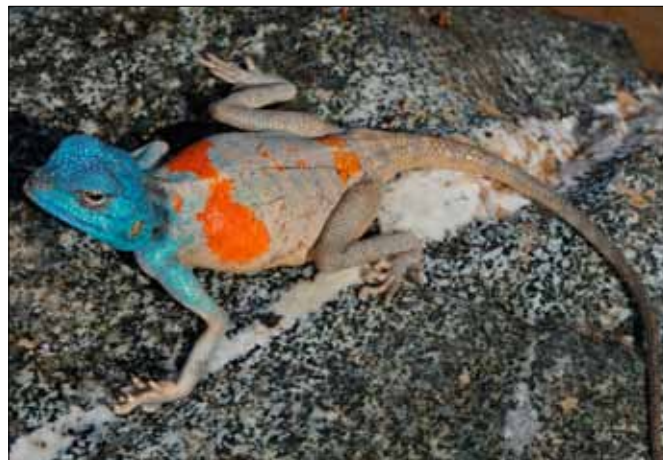

**C**

Useful information

|                             |     |
|-----------------------------|-----|
| IUCN Category               | NE  |
| Endemic                     | NO  |
| Venomous                    | NO  |
| Insular                     | NO  |
| Present in a protected area | YES |

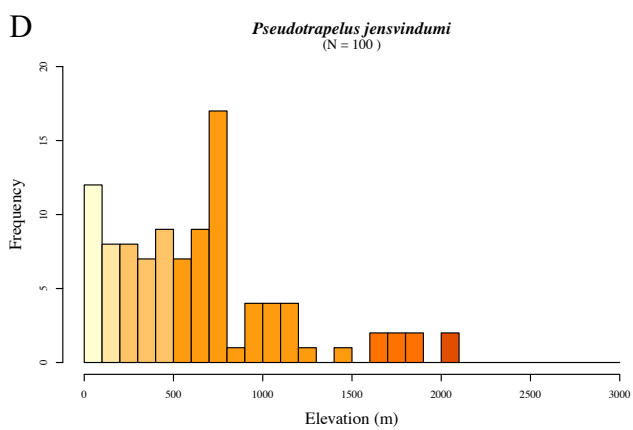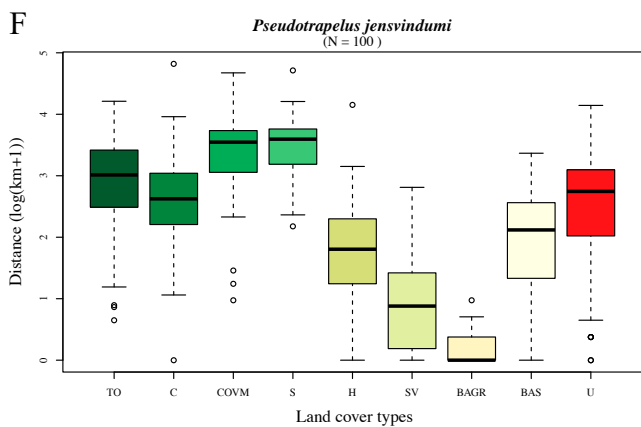

**E**

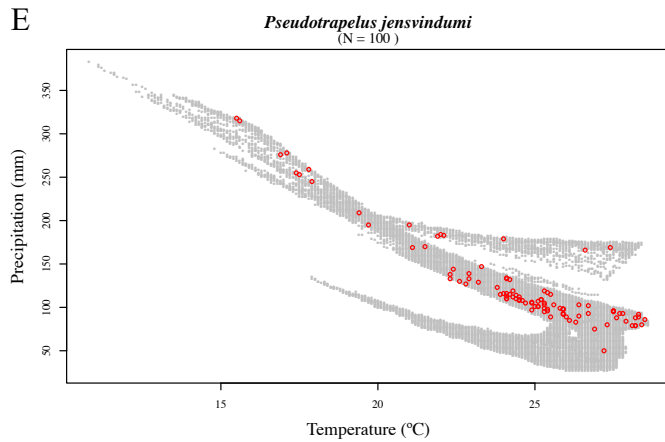

Lizards

Agamids

Geckos

Lacertids

Skinks

Amphisbaenids

Varamids

Snakes

Boidae

Colubridae

Elapidae

Lamprophiidae

Leptotyphlopidae

Typhlopidae

Viperidae

- Lizards
- Agamids
- Geckos
- Lacertids
- Skinks
- Amphisbaenids
- Varanids
- Snakes
- Boidae
- Colubridae
- Elapidae
- Lamprophiidae
- Leptotyphlopidae
- Typhlopidae
- Viperidae

***Trapelus flavimaculatus***  
Rüppell, 1835

**S8: Species information**  
Lizards  
Agamids, Agamidae

A

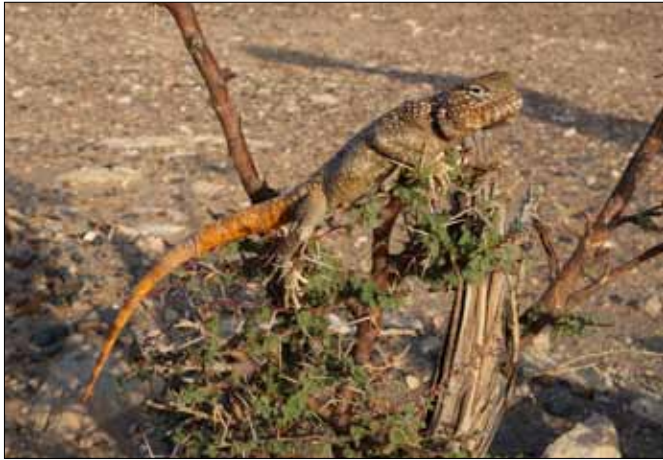

B

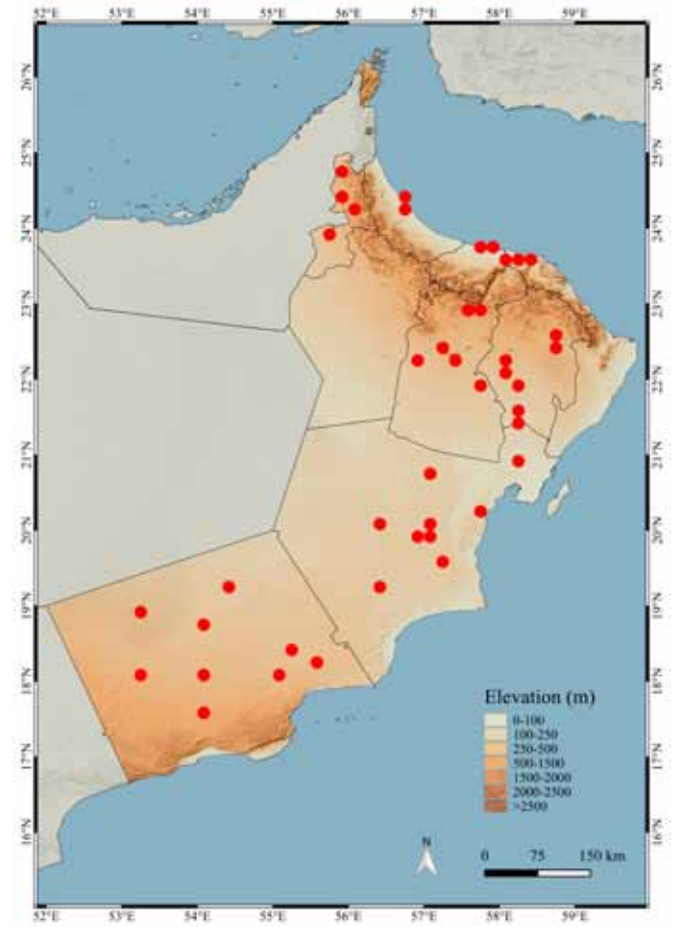

C

Useful information

|                             |     |
|-----------------------------|-----|
| IUCN Category               | LC  |
| Endemic                     | NO  |
| Venomous                    | NO  |
| Insular                     | NO  |
| Present in a protected area | YES |

D

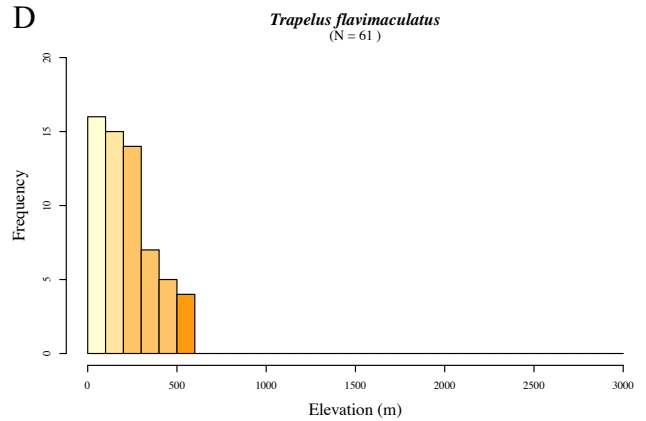

E

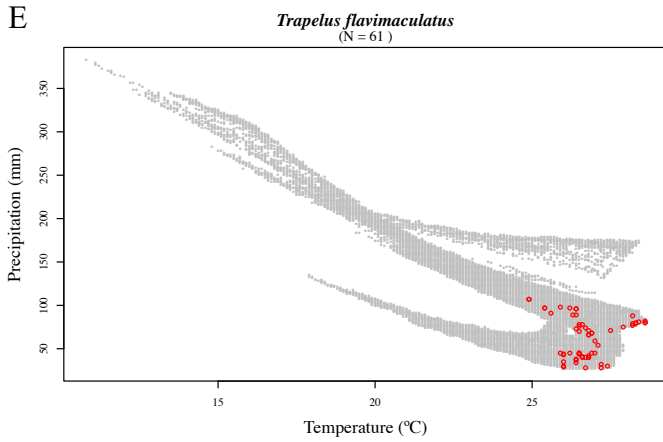

F

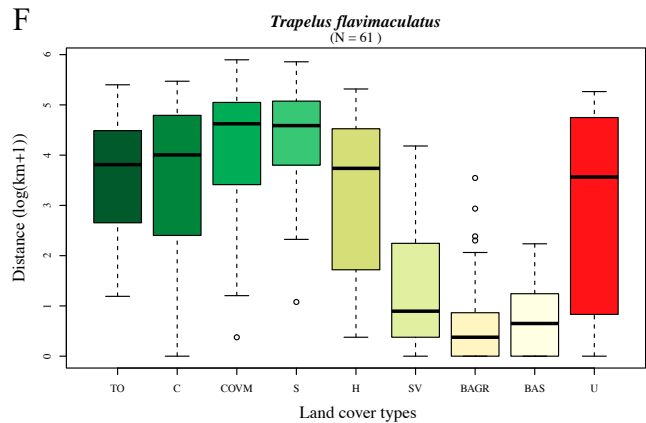



**S9: Species information**

Lizards

Agamids, Agamidae

***Uromastix aegyptia leptieni***  
Wilms & Böhme, 2000

**B**

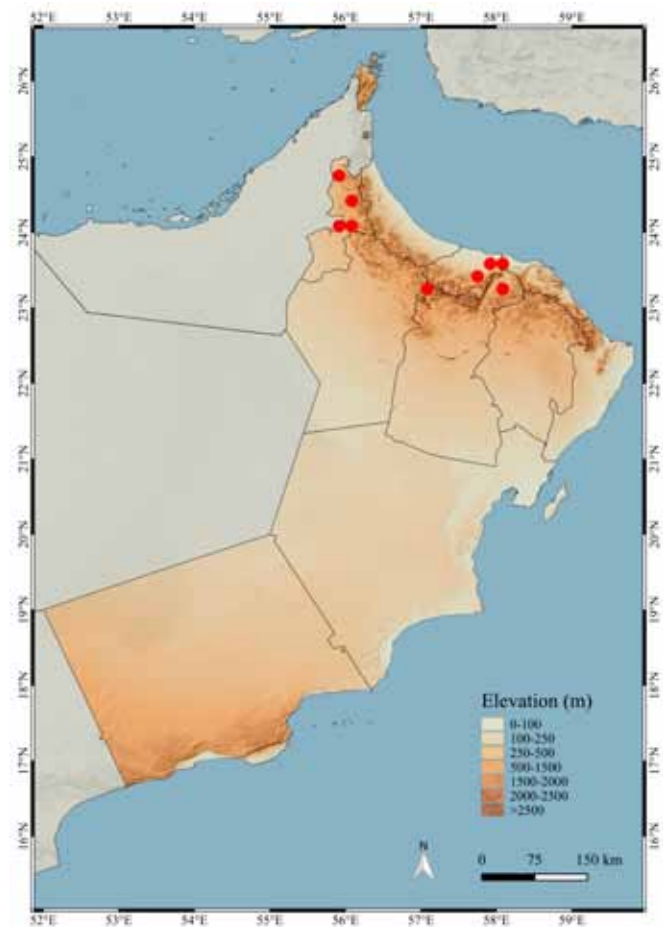

**A**

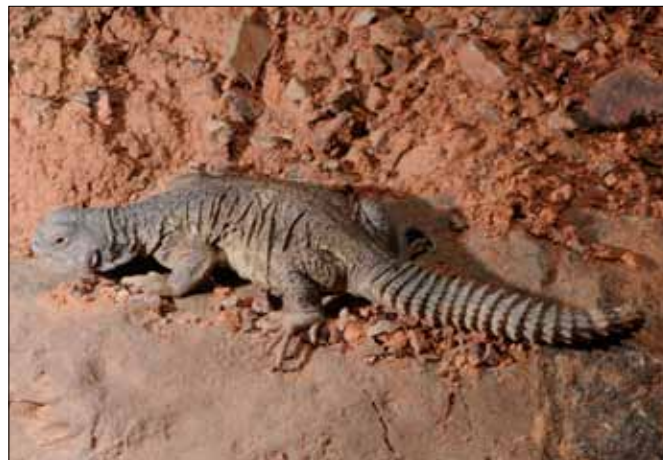

**C**

Useful information

|                             |    |
|-----------------------------|----|
| IUCN Category               | VU |
| Endemic                     | NO |
| Venomous                    | NO |
| Insular                     | NO |
| Present in a protected area | NO |

**D**

*Uromastix aegyptia leptieni*  
(N = 11)

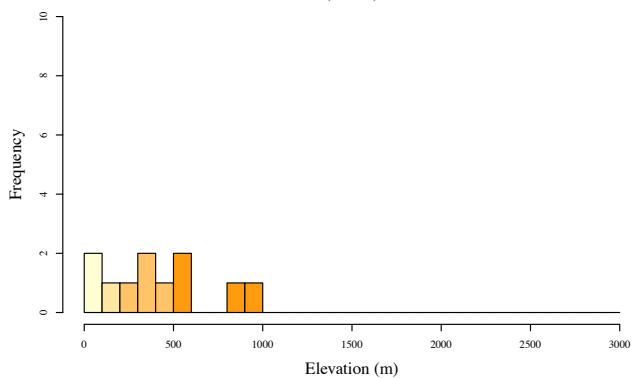

**F**

*Uromastix aegyptia leptieni*  
(N = 11)

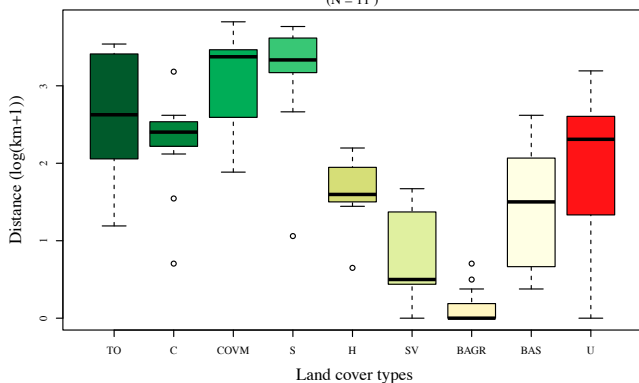

**E**

*Uromastix aegyptia leptieni*  
(N = 11)

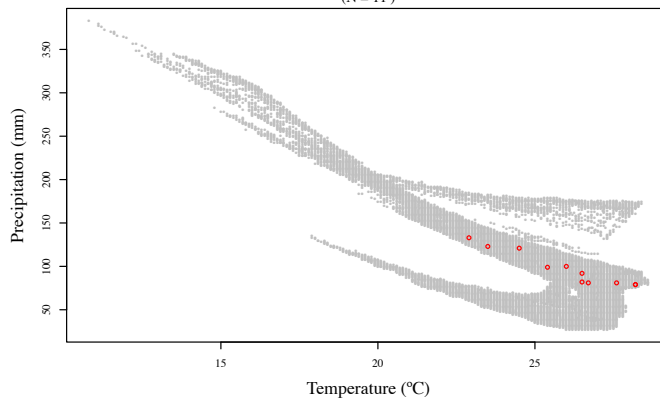

Lizards

Agamids

Geckos

Lacertids

Skinks

Amphisbaenids

Varamids

Snakes

Boidae

Colubridae

Elapidae

Lamprophiidae

Leptotyphlopidae

Typhlopidae

Viperidae

***Uromastix aegyptia microlepis***  
**Arnold, 1980**

**S10: Species information**

Lizards

Agamids, Agamidae

A

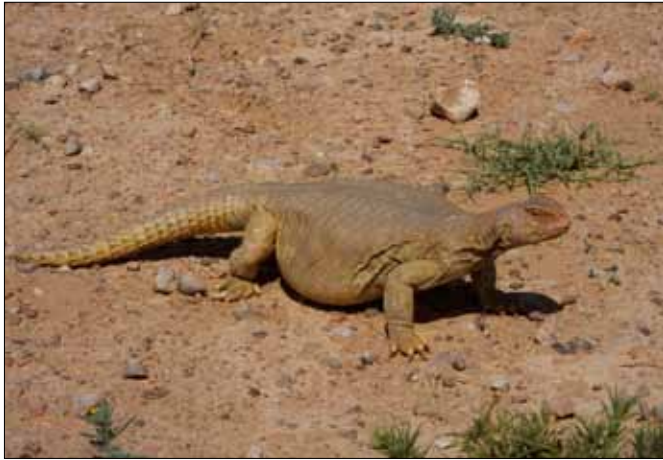

B

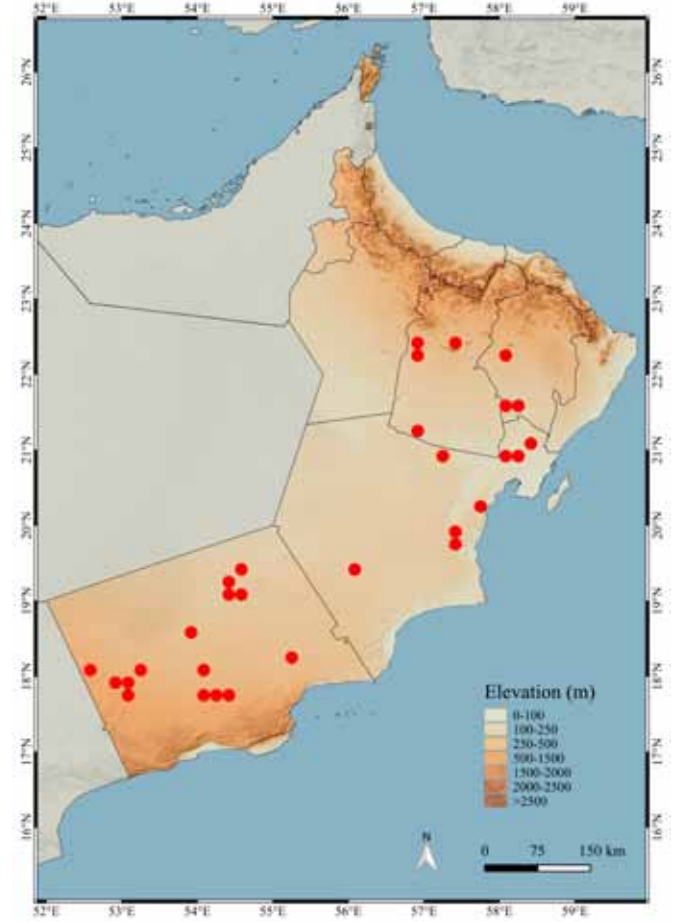

C

Useful information

|                             |     |
|-----------------------------|-----|
| IUCN Category               | VU  |
| Endemic                     | NO  |
| Venomous                    | NO  |
| Insular                     | NO  |
| Present in a protected area | YES |

D

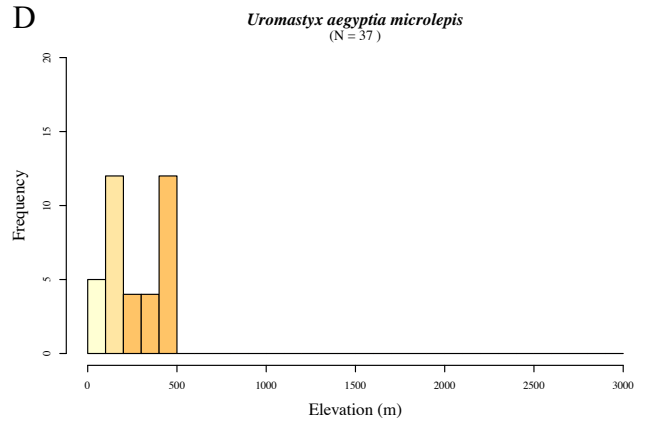

E

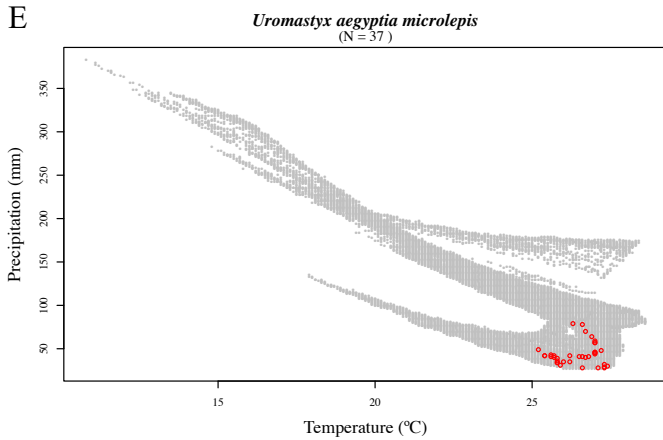

F

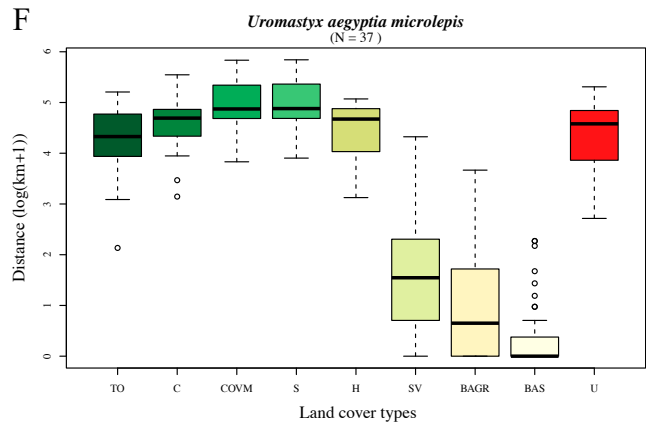

- Lizards
- Agamids
- Gekcos
- Lacertids
- Skinks
- Amphisbaenids
- Varanids
- Snakes
- Boidae
- Colubridae
- Elapidae
- Lamprophiidae
- Leptotyphlopidae
- Typhlopidae
- Viperidae

**S11: Species information**

Lizards

Agamids, Agamidae

***Uromastyx benti***  
(Anderson, 1894)

**B**

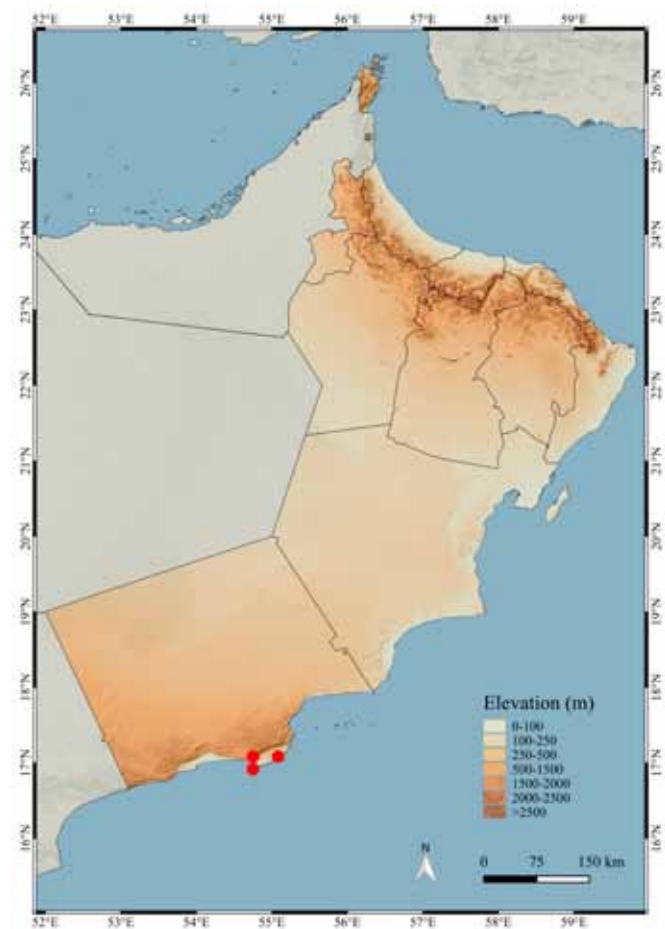

**A**

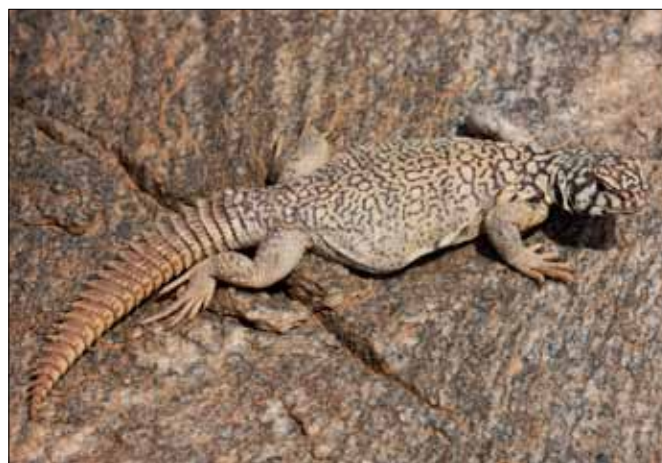

**C**

Useful information

|                             |    |
|-----------------------------|----|
| IUCN Category               | LC |
| Endemic                     | NO |
| Venomous                    | NO |
| Insular                     | NO |
| Present in a protected area | NO |

**D**

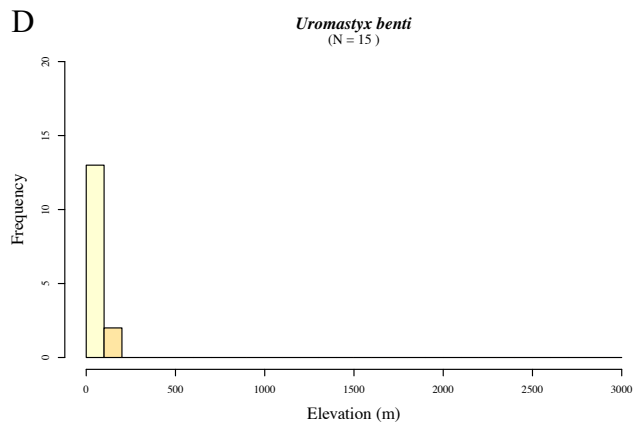

**F**

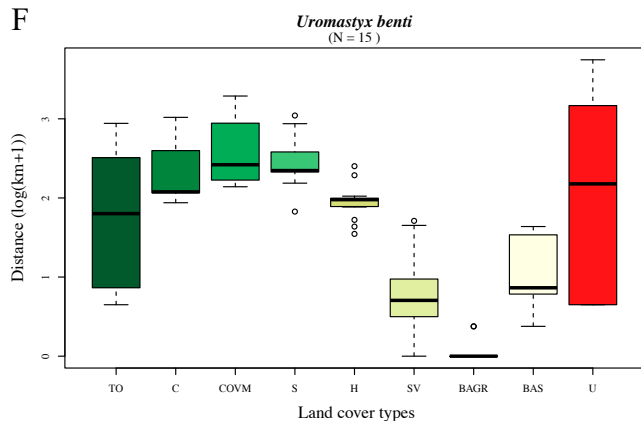

**E**

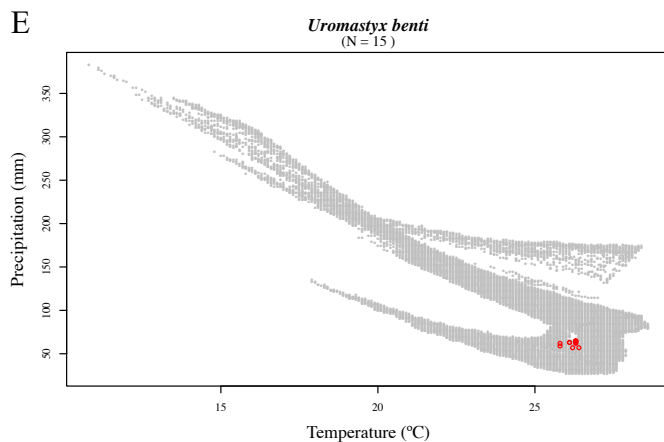

Lizards

Agamids

Geckos

Lacertids

Skinks

Amphisbaenids

Varamids

Snakes

Boidae

Colubridae

Elapidae

Lamprophiidae

Leptotyphlopidae

Typhlopidae

Viperidae

- Lizards
- Agamids
- Geckos
- Lacertids
- Skinks
- Amphisbaenids
- Varanids
- Snakes
- Boidae
- Colubridae
- Elapidae
- Lamprophiidae
- Leptotyphlopidae
- Typhlopidae
- Viperidae

***Uromastyx thomasi***  
Parker, 1930

**S12: Species information**

Lizards  
Agamids, Agamidae

A

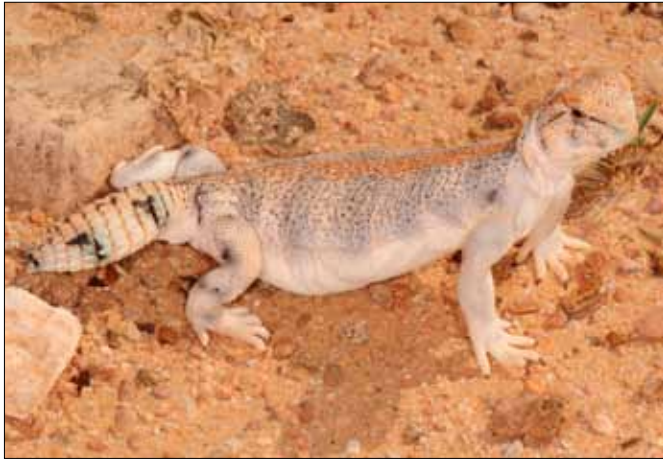

B

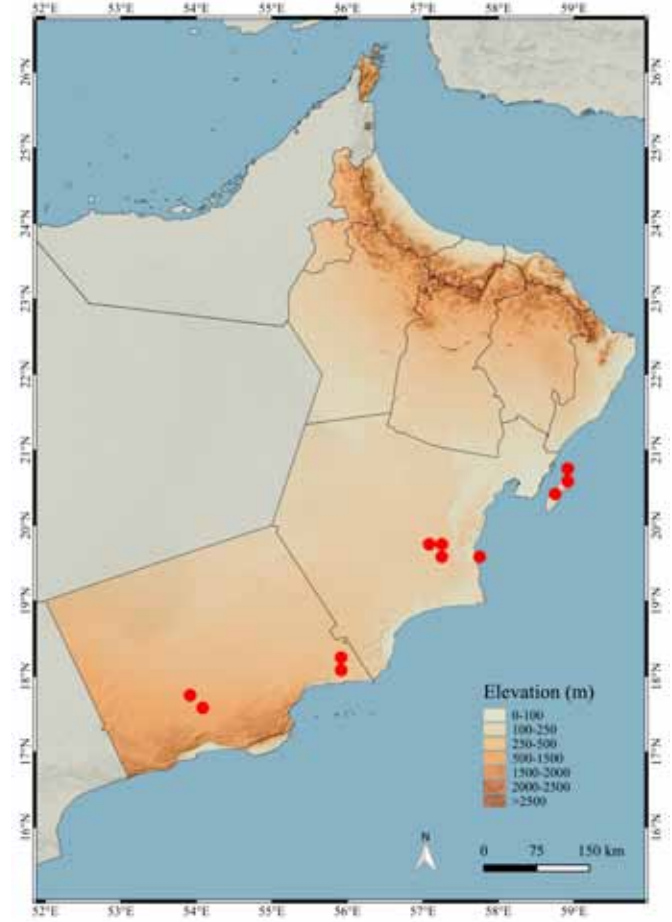

C

Useful information

|                             |     |
|-----------------------------|-----|
| IUCN Category               | VU  |
| Endemic                     | YES |
| Venomous                    | NO  |
| Insular                     | YES |
| Present in a protected area | YES |

E

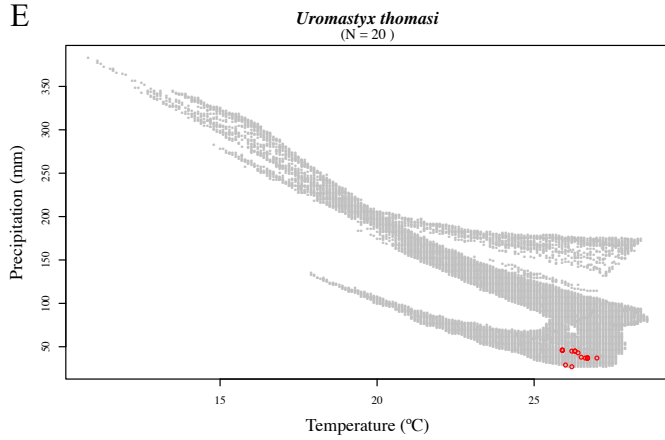

D

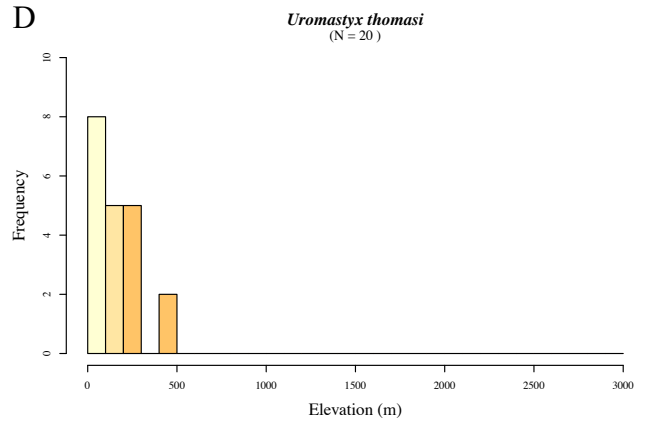

F

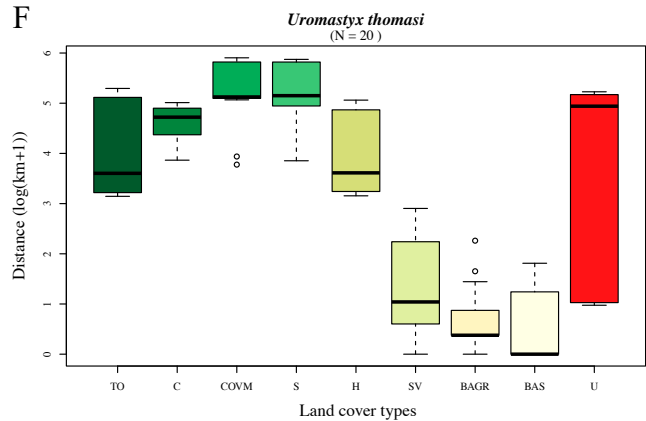

**S13: Species information**

Lizards

Agamids, Chamaeleonidae

*Chamaeleo arabicus*  
Matschie, 1893

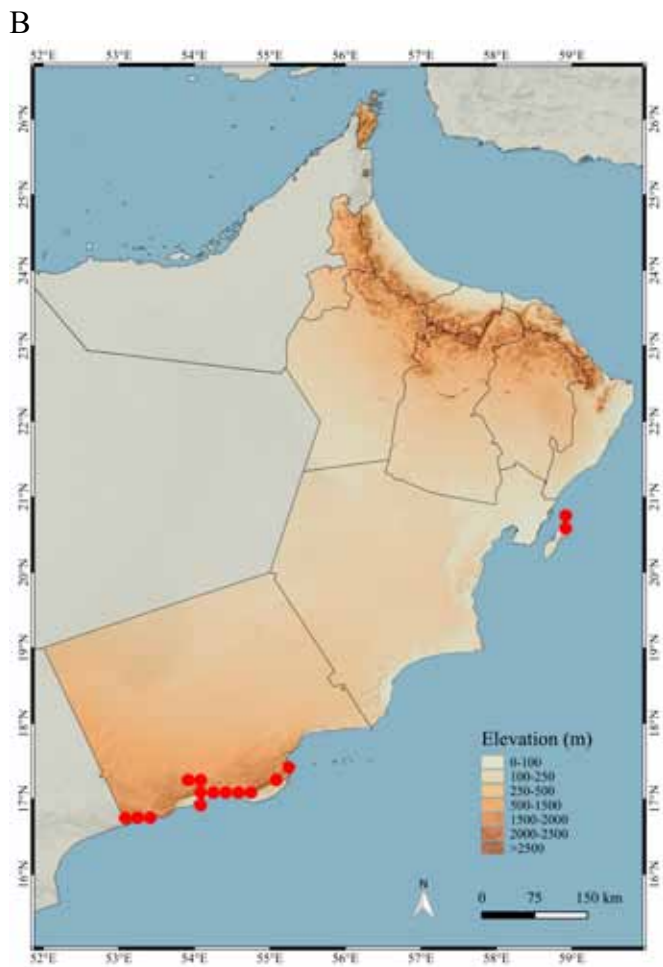

**A**

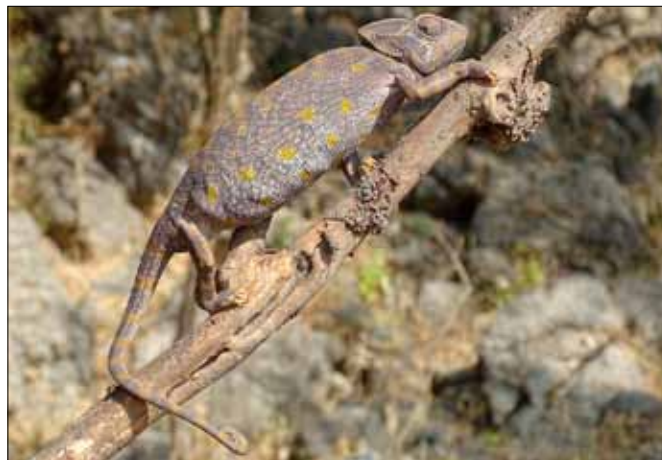

**C**

Useful information

|                             |     |
|-----------------------------|-----|
| IUCN Category               | LC  |
| Endemic                     | NO  |
| Venomous                    | NO  |
| Insular                     | YES |
| Present in a protected area | YES |

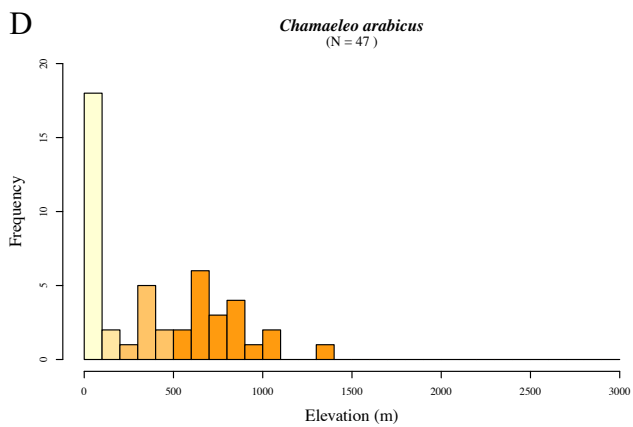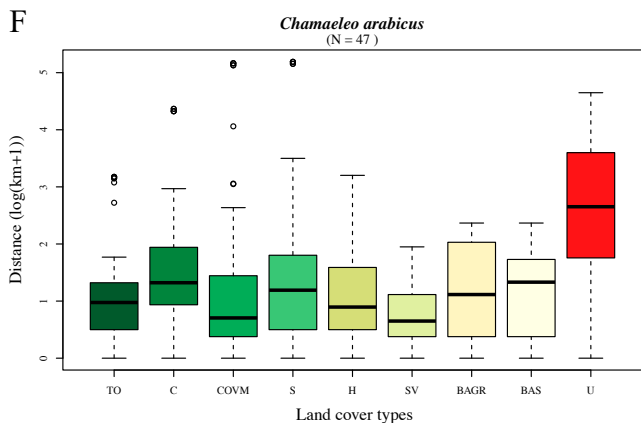

**E**

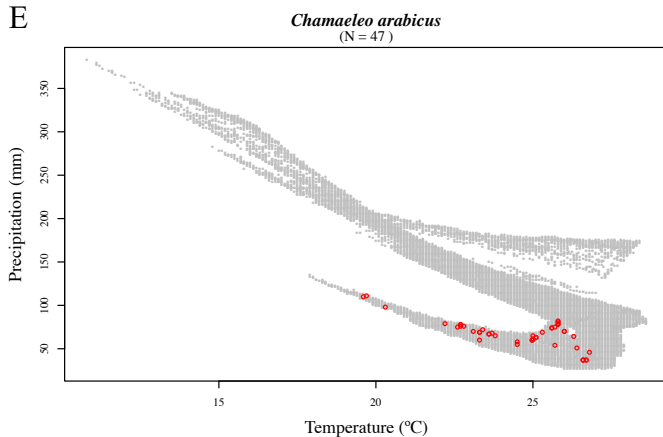

Lizards

Agamids

Geckos

Lacertids

Skinks

Amphisbaenids

Varamids

Snakes

Boidae

Colubridae

Elapidae

Lamprophiidae

Leptotyphlopidae

Typhlopidae

Viperidae

***Bunopus tuberculatus***  
**Blanford, 1874**

**S14: Species information**

Lizards  
 Geckos, Gekkonidae

A

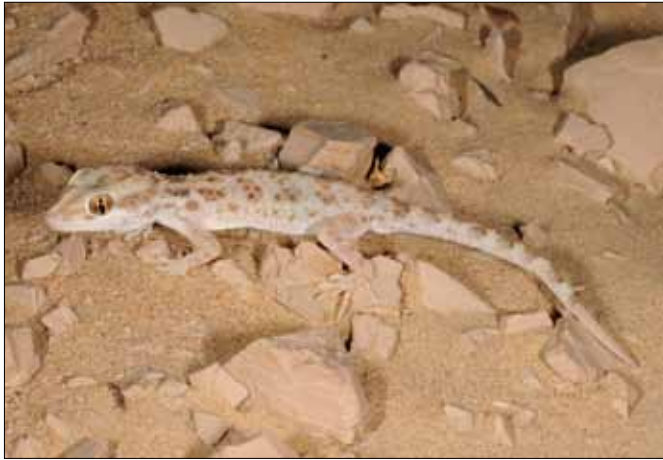

B

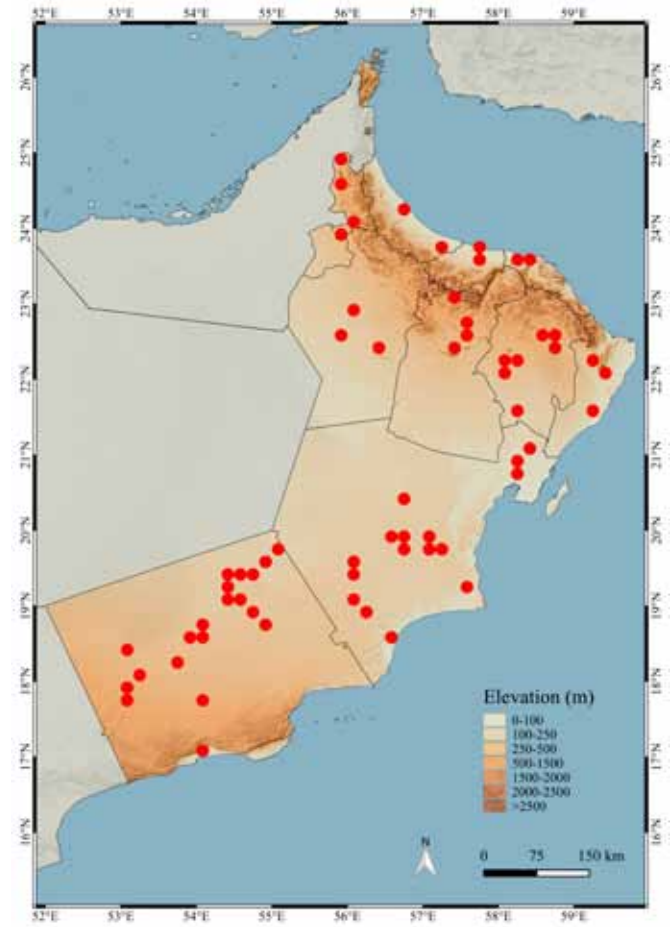

C

**Useful information**

|                             |     |
|-----------------------------|-----|
| IUCN Category               | LC  |
| Endemic                     | NO  |
| Venomous                    | NO  |
| Insular                     | NO  |
| Present in a protected area | YES |

D

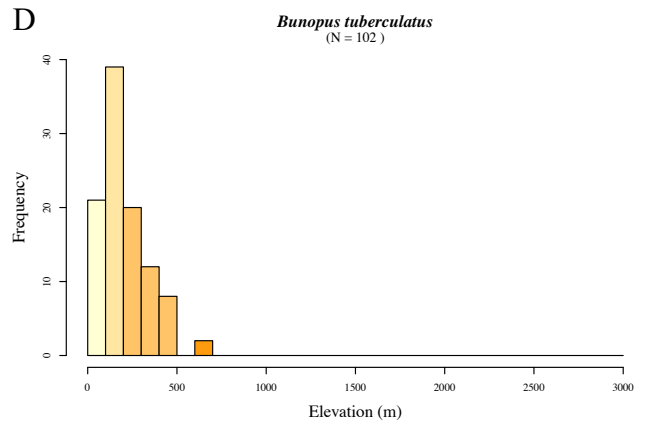

E

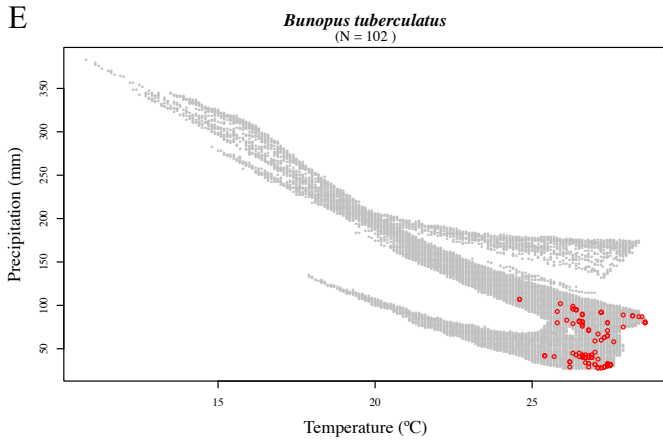

F

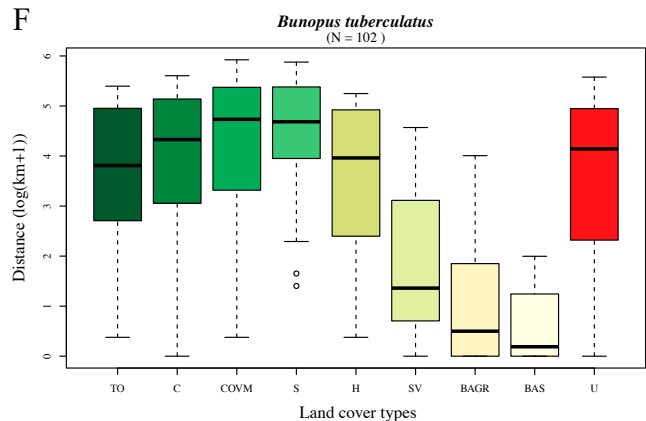

- Lizards
- Agamids
- Geckos**
- Lacertids
- Skinks
- Amphisbaenids
- Varanids
- Snakes
- Boidae
- Colubridae
- Elapidae
- Lamprophiidae
- Leptotyphlopidae
- Typhlopidae
- Viperidae

**S15: Species information**

Lizards

Geckos, Gekkonidae

*Cyrtopodion scabrum*  
(Heyden, 1827)

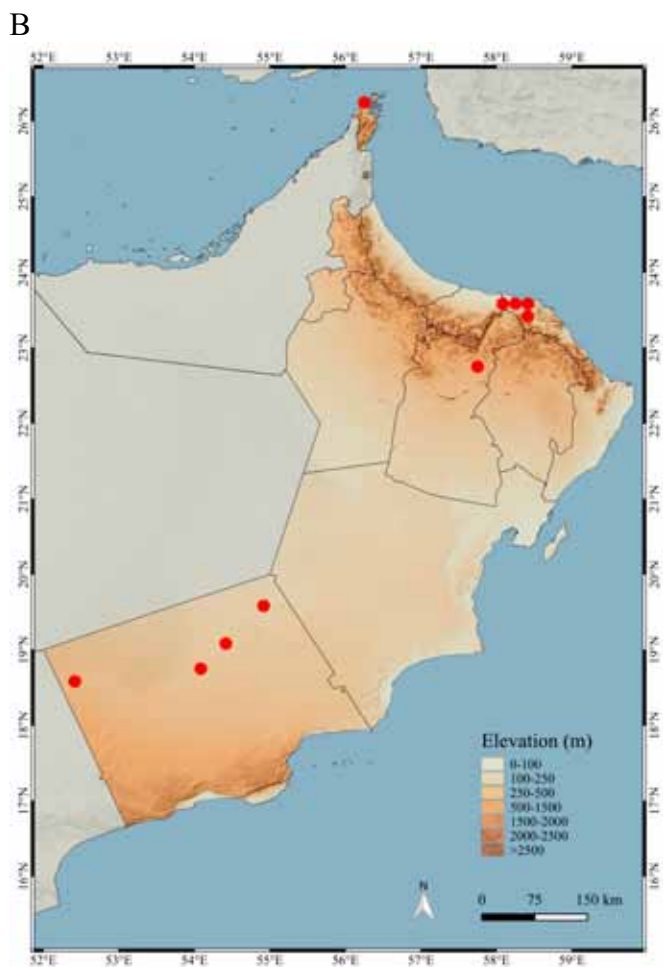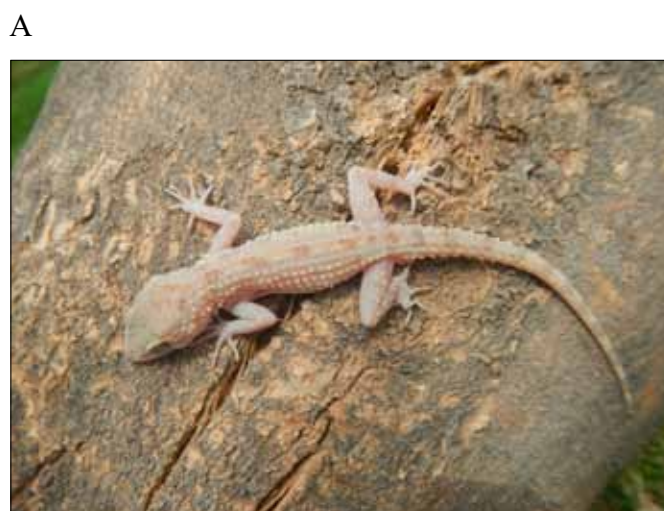

**C**

Useful information

|                             |    |
|-----------------------------|----|
| IUCN Category               | LC |
| Endemic                     | NO |
| Venomous                    | NO |
| Insular                     | NO |
| Present in a protected area | NO |

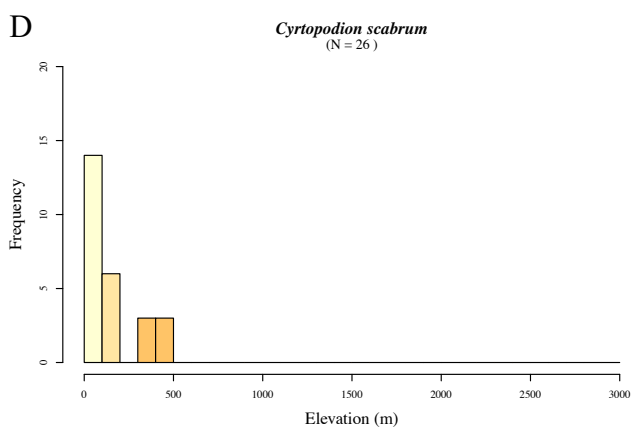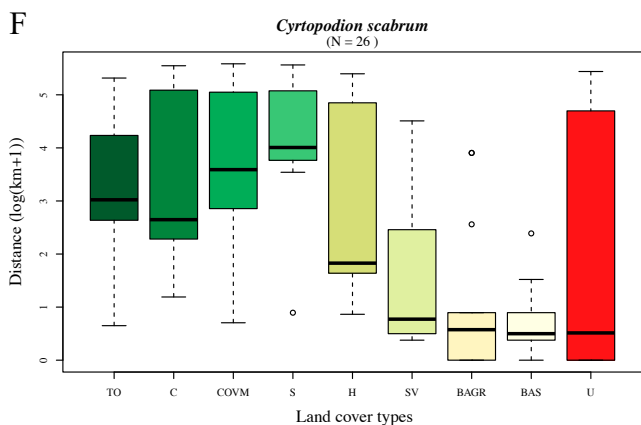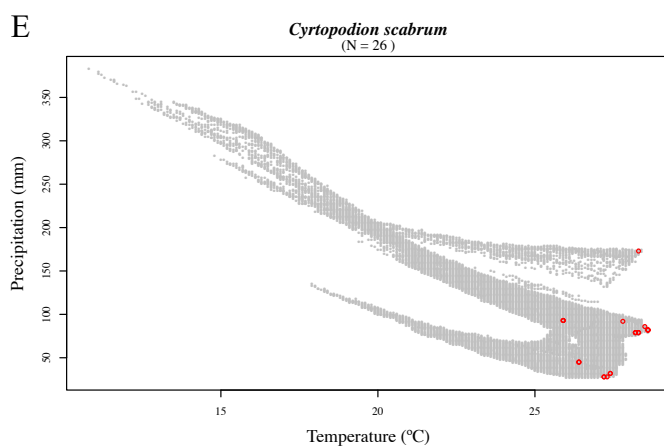

- Lizards
- Agamids
- Geckos**
- Lacertids
- Skinks
- Amphisbaenids
- Varamids
- Snakes
- Boidae
- Colubridae
- Elapidae
- Lamprophiidae
- Leptotyphlopidae
- Typhlopidae
- Viperidae

***Hemidactylus alkiyumii***  
Carranza & Arnold, 2012

**S16: Species information**

Lizards

Geckos, Gekkonidae

A

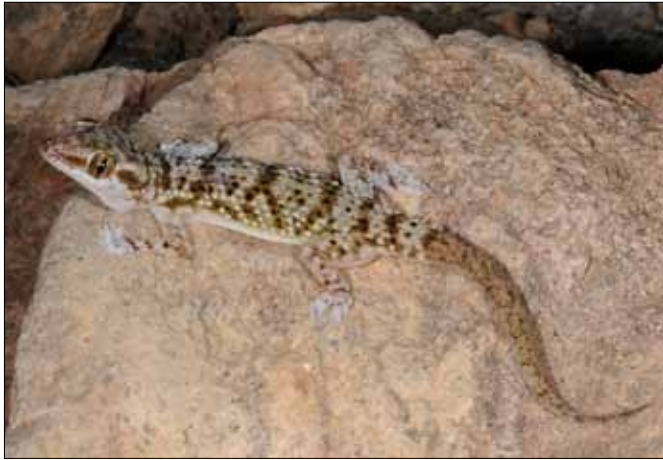

B

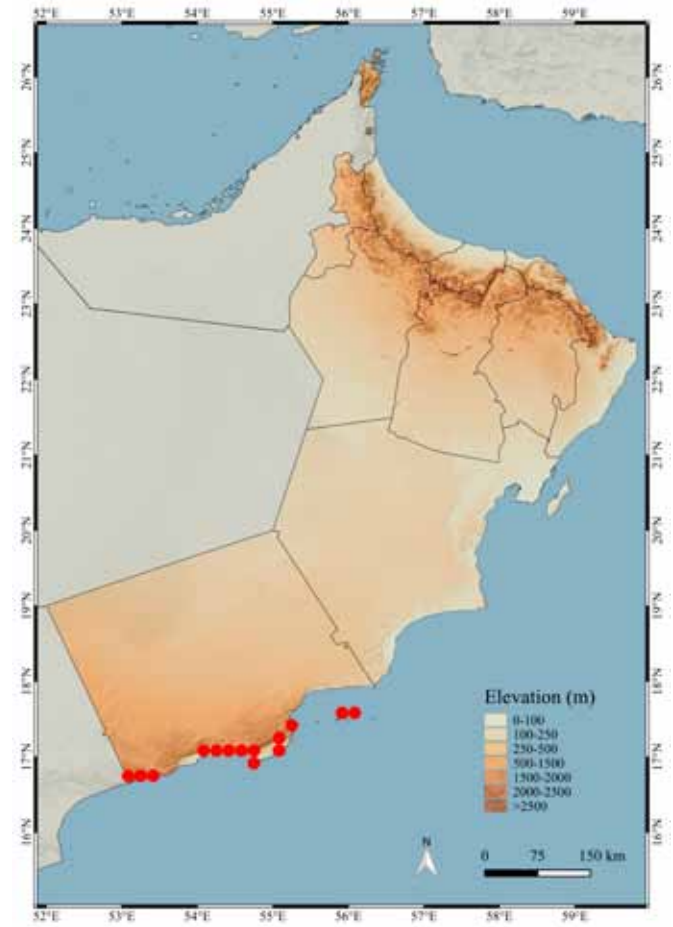

C

Useful information

|                             |     |
|-----------------------------|-----|
| IUCN Category               | NE  |
| Endemic                     | NO  |
| Venomous                    | NO  |
| Insular                     | YES |
| Present in a protected area | YES |

D

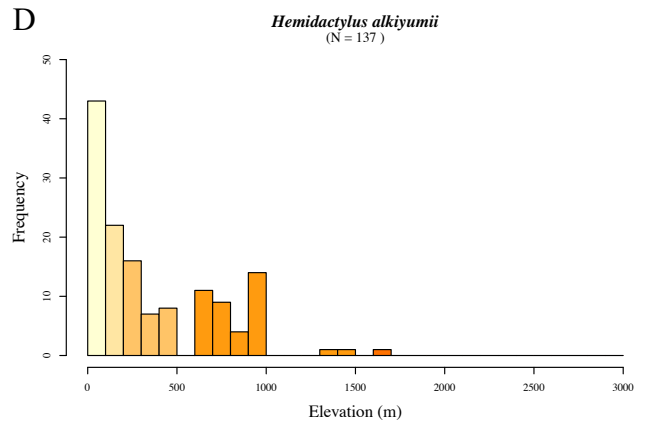

E

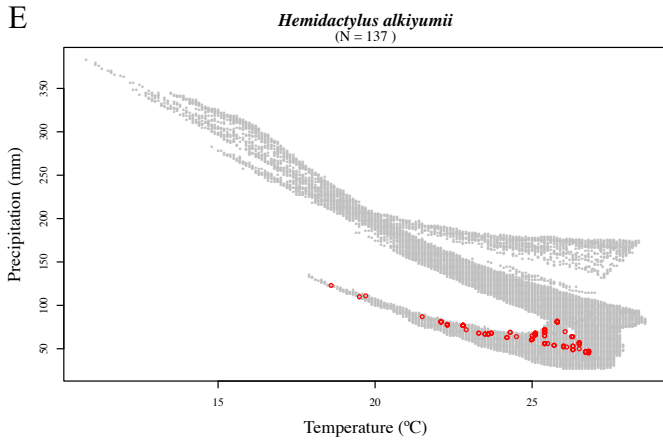

F

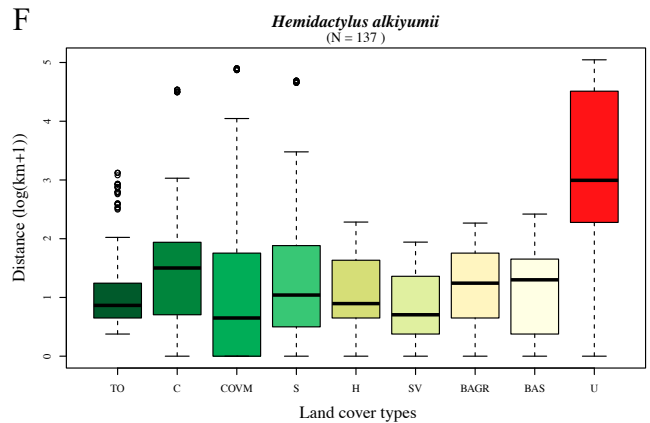

- Lizards
- Agamids
- Geckos
- Lacertids
- Skinks
- Amphisbaenids
- Varanids
- Snakes
- Boidae
- Colubridae
- Elapidae
- Lamprophiidae
- Leptotyphlopidae
- Typhlopidae
- Viperidae



**S17: Species information**

Lizards

Geckos, Gekkonidae

***Hemidactylus endophis***  
Carranza & Arnold, 2012

**B**

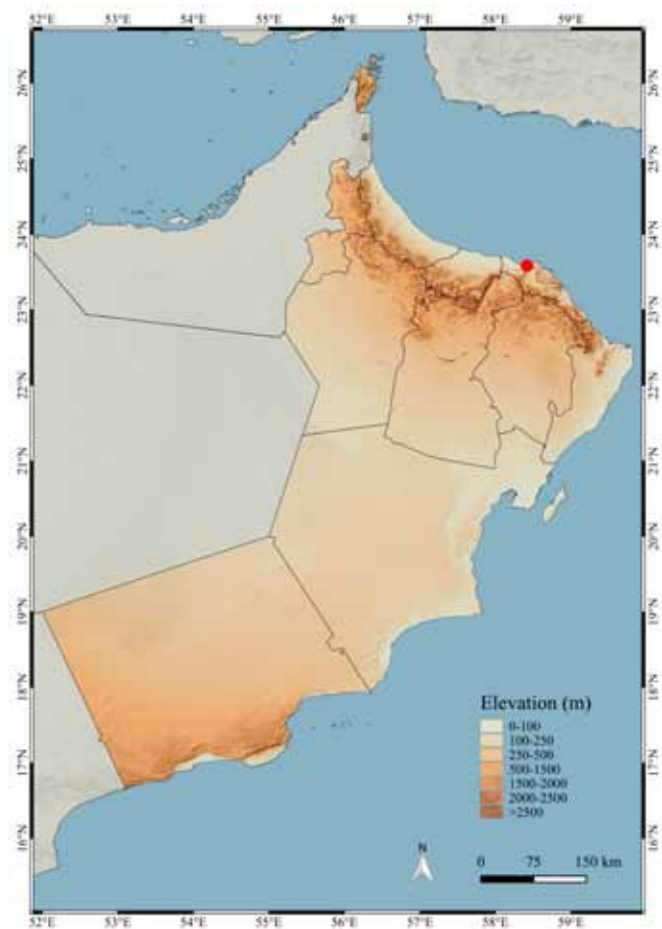

**A**

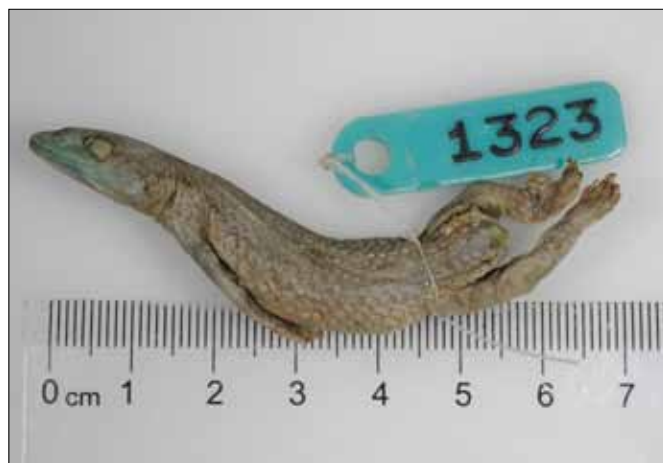

Specimen code: **BMNH1976.1323**

**C**

Useful information

|                             |     |
|-----------------------------|-----|
| IUCN Category               | NE  |
| Endemic                     | YES |
| Venomous                    | NO  |
| Insular                     | NO  |
| Present in a protected area | NO  |

**D**

*Hemidactylus endophis*  
(N = 1)

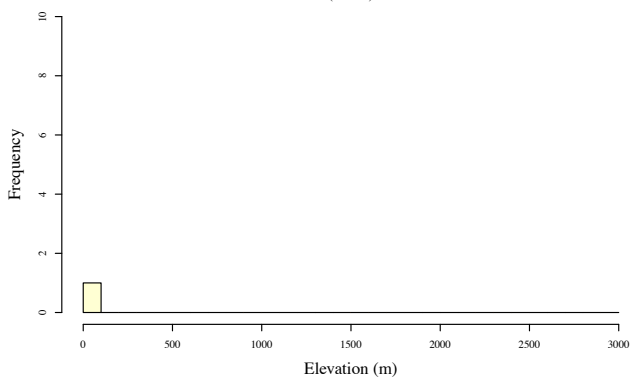

**F**

*Hemidactylus endophis*  
(N = 1)

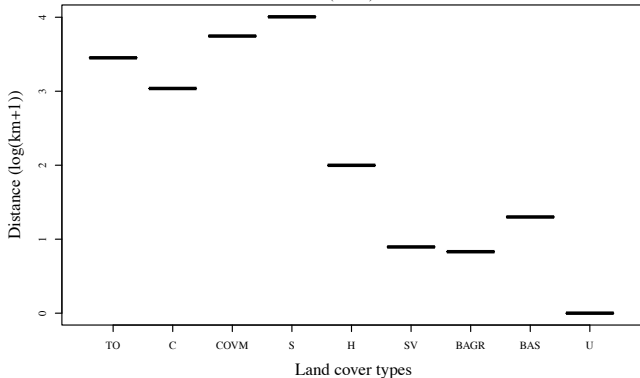

**E**

*Hemidactylus endophis*  
(N = 1)

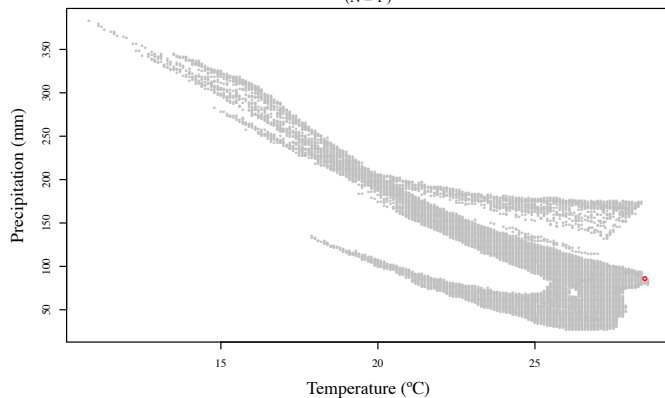

Lizards

Agamids

Geckos

Lacertids

Skinks

Amphisbaenids

Varamids

Snakes

Boidae

Colubridae

Elapidae

Lamprophiidae

Leptotyphlopidae

Typhlopidae

Viperidae

***Hemidactylus festivus***  
Carranza & Arnold, 2012

**S18: Species information**

Lizards  
Geckos, Gekkonidae

A

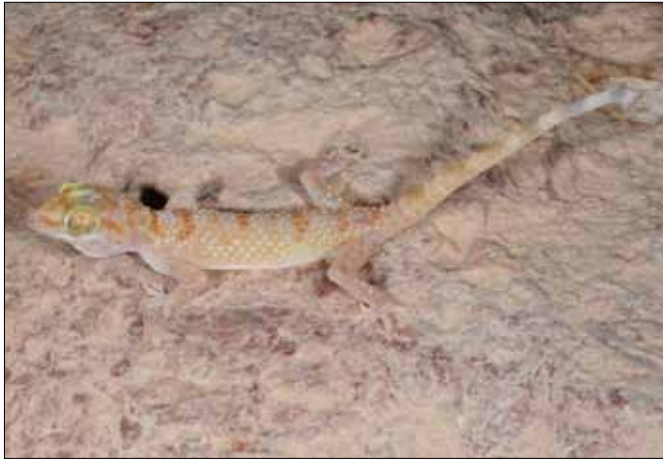

B

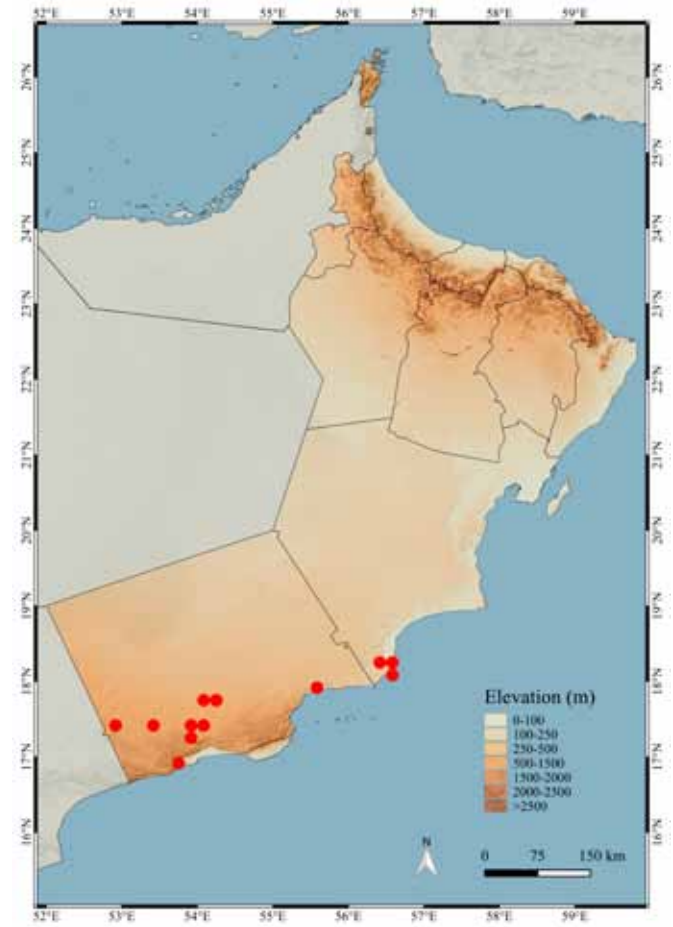

C

Useful information

|                             |    |
|-----------------------------|----|
| IUCN Category               | NE |
| Endemic                     | NO |
| Venomous                    | NO |
| Insular                     | NO |
| Present in a protected area | NO |

D

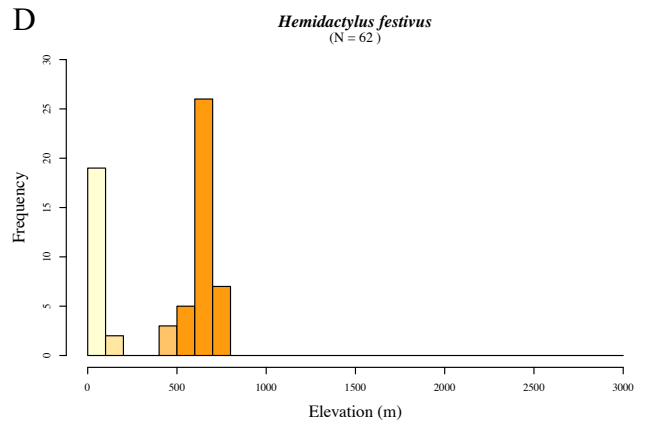

E

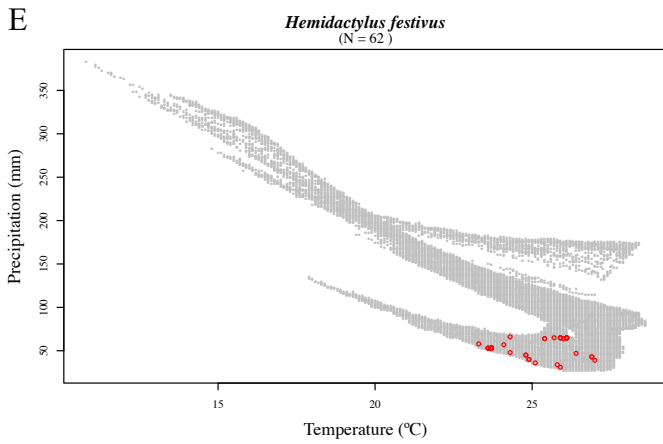

F

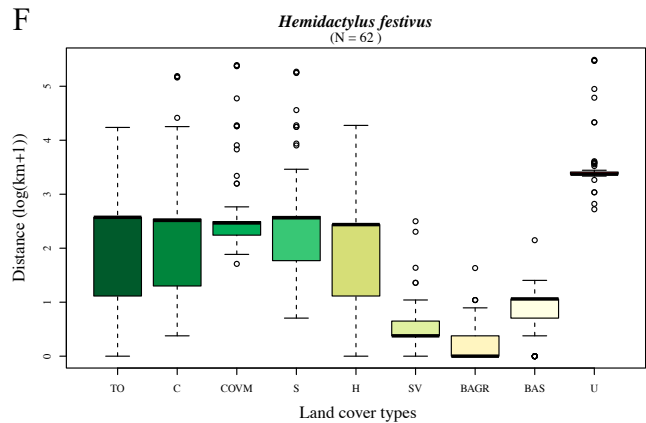

**S19: Species information**

Lizards

Geckos, Gekkonidae

*Hemidactylus flaviviridis*  
Rüppell, 1835

**B**

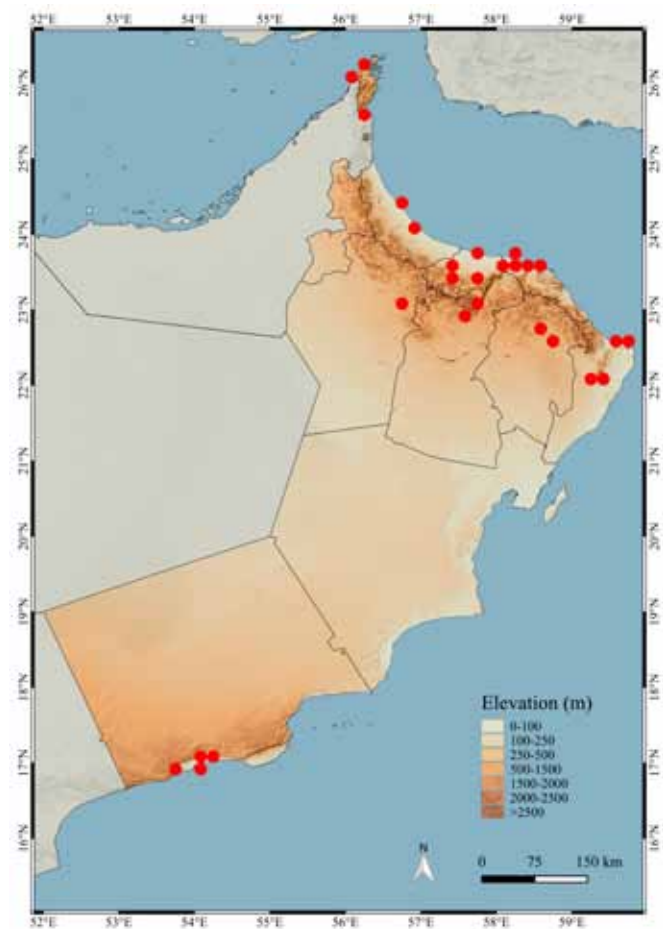

**A**

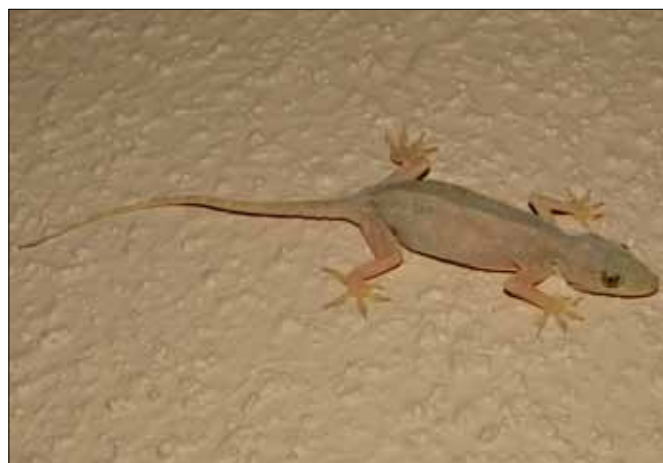

**C**

Useful information

|                             |     |
|-----------------------------|-----|
| IUCN Category               | LC* |
| Endemic                     | NO  |
| Venomous                    | NO  |
| Insular                     | NO  |
| Present in a protected area | YES |

\*Not available on the web

**D**

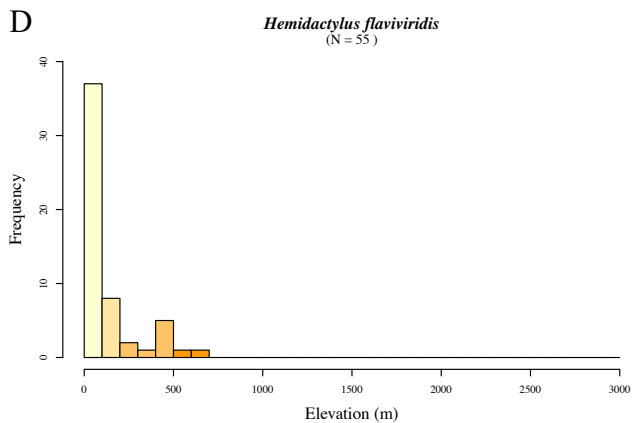

**F**

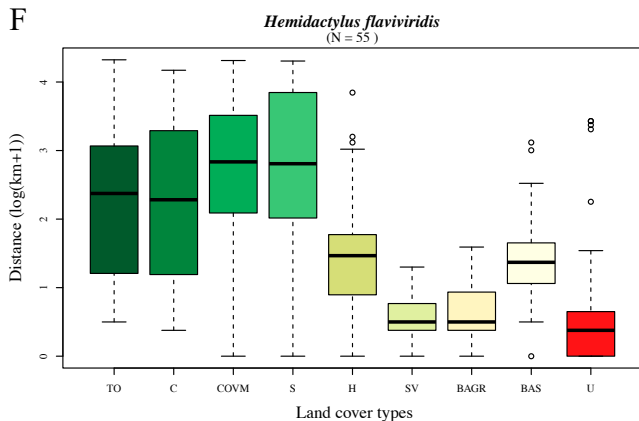

**E**

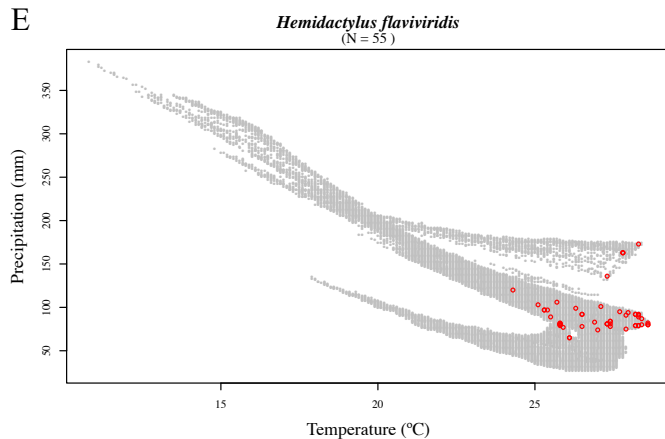

Lizards

Agamids

Geckos

Lacertids

Skinks

Amphisbaenids

Varamids

Snakes

Boidae

Colubridae

Elapidae

Lamprophiidae

Leptotyphlopidae

Typhlopidae

Viperidae

***Hemidactylus hajarensis***  
Carranza & Arnold, 2012

**S20: Species information**

Lizards

Geckos, Gekkonidae

A

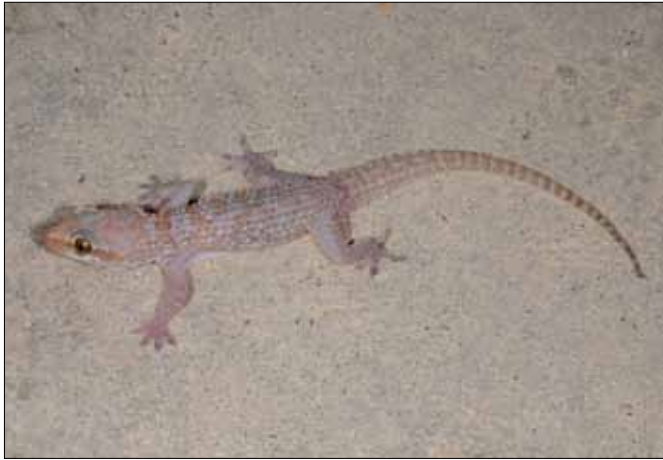

B

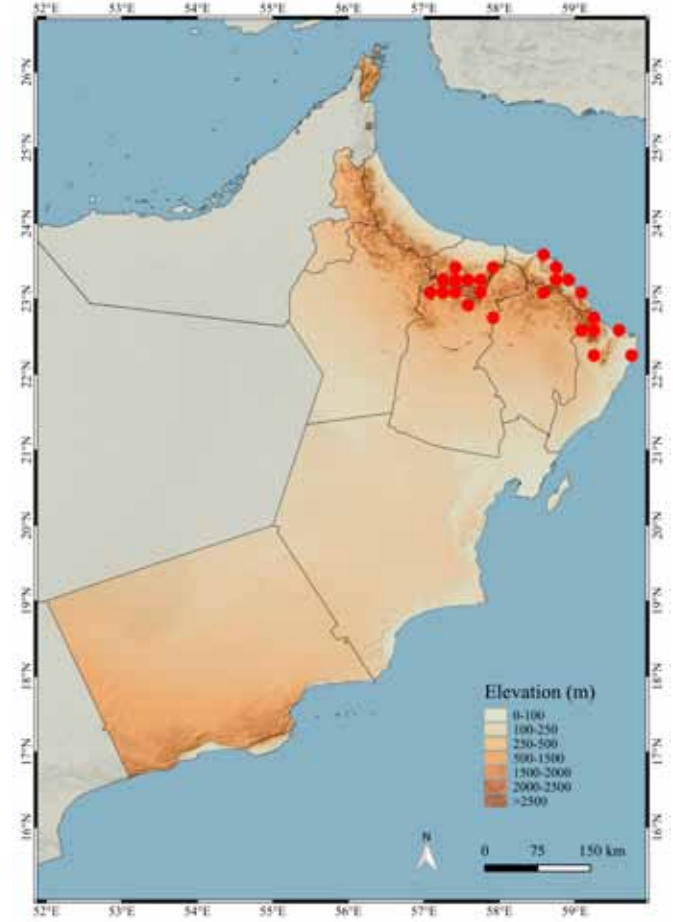

C

Useful information

|                             |     |
|-----------------------------|-----|
| IUCN Category               | NE  |
| Endemic                     | YES |
| Venomous                    | NO  |
| Insular                     | NO  |
| Present in a protected area | YES |

D

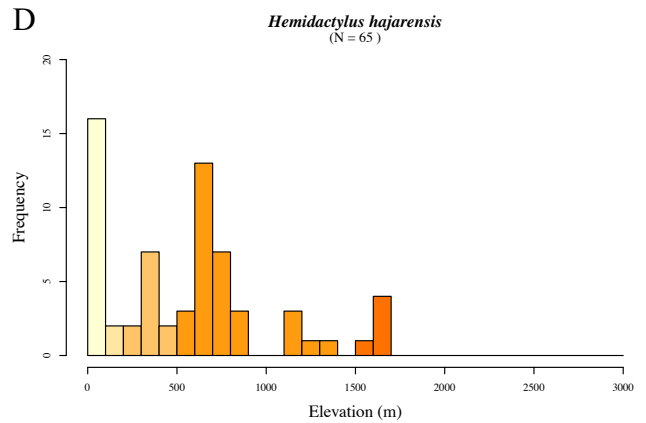

E

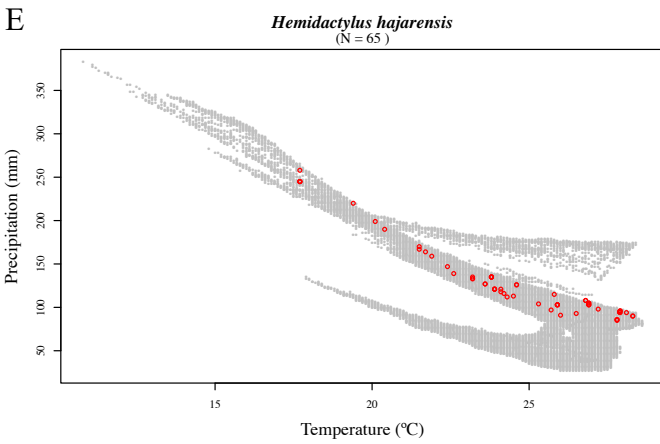

F

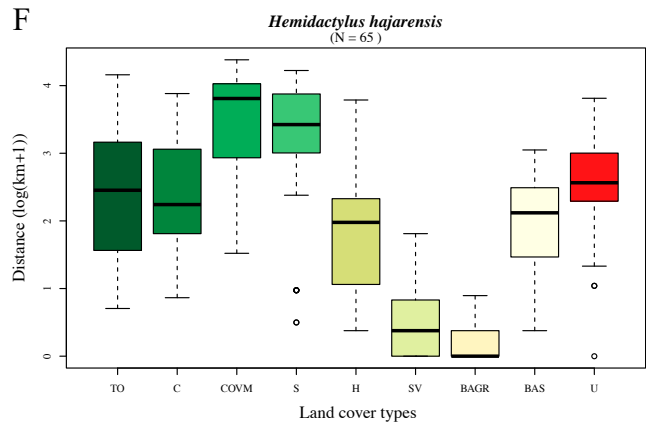

- Lizards
- Agamids
- Geckos
- Lacertids
- Skinks
- Amphisbaenids
- Varanids
- Snakes
- Boidae
- Colubridae
- Elapidae
- Lamprophiidae
- Leptotyphlopidae
- Typhlopidae
- Viperidae

**S21: Species information**

Lizards

Geckos, Gekkonidae

*Hemidactylus inexpectatus*  
Carranza & Arnold, 2012

**B**

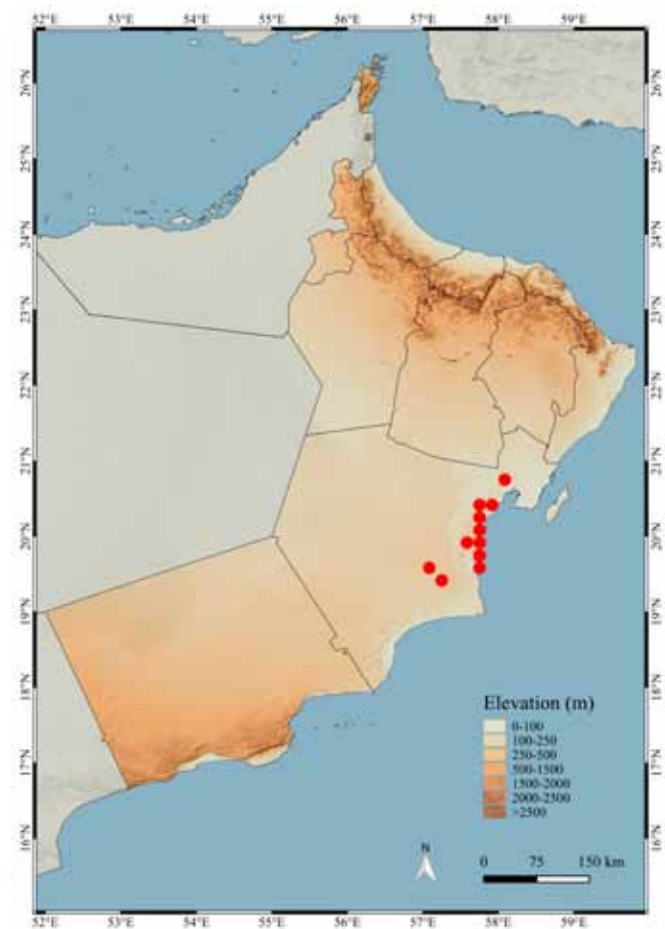

**A**

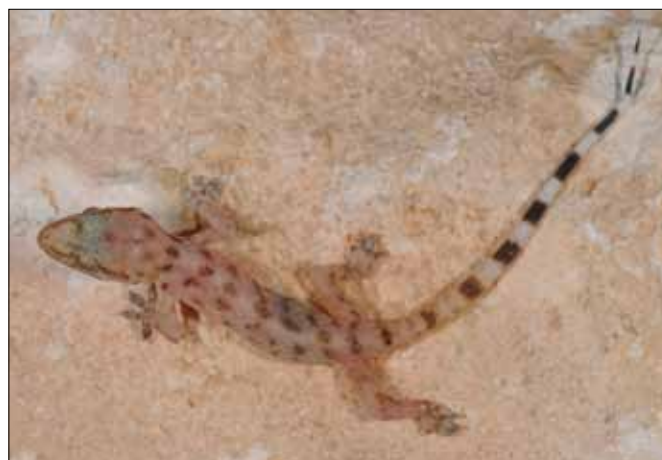

**C**

Useful information

|                             |     |
|-----------------------------|-----|
| IUCN Category               | NE  |
| Endemic                     | YES |
| Venomous                    | NO  |
| Insular                     | YES |
| Present in a protected area | NO  |

**D**

*Hemidactylus inexpectatus*  
(N = 33)

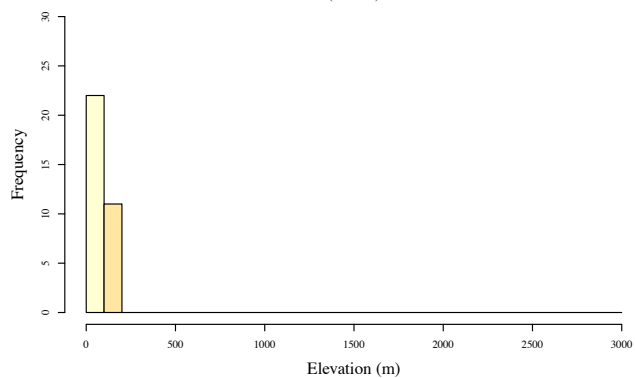

**F**

*Hemidactylus inexpectatus*  
(N = 33)

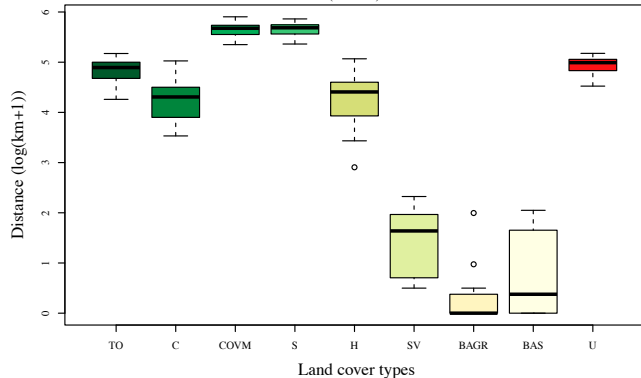

**E**

*Hemidactylus inexpectatus*  
(N = 33)

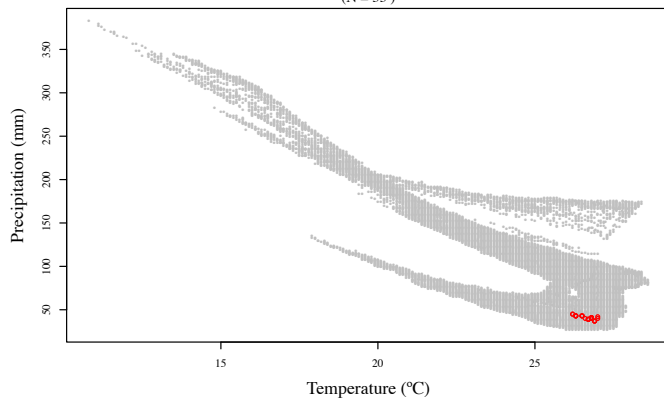

- Lizards
- Agamids
- Geckos**
- Lacertids
- Skinks
- Amphisbaenids
- Varamids
- Snakes
- Boidae
- Colubridae
- Elapidae
- Lamprophiidae
- Leptotyphlopidae
- Typhlopidae
- Viperidae

***Hemidactylus lemurinus***  
**Arnold, 1980**

**S22: Species information**

Lizards  
 Geckos, Gekkonidae

A

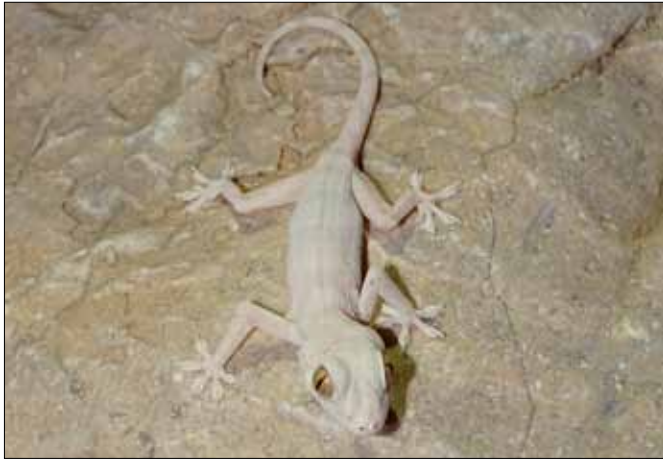

B

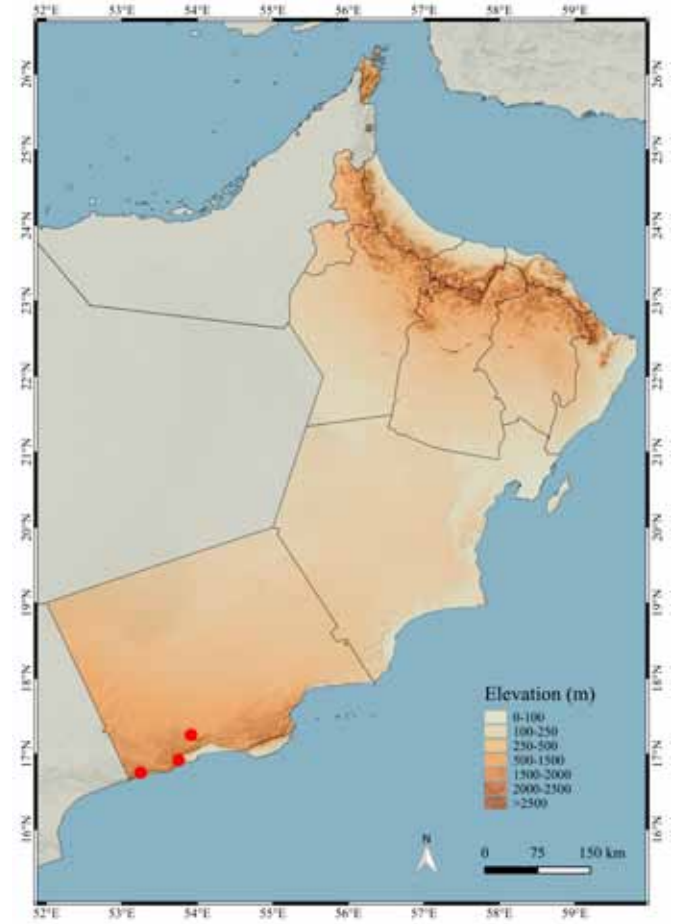

C

Useful information

|                             |    |
|-----------------------------|----|
| IUCN Category               | DD |
| Endemic                     | NO |
| Venomous                    | NO |
| Insular                     | NO |
| Present in a protected area | NO |

D

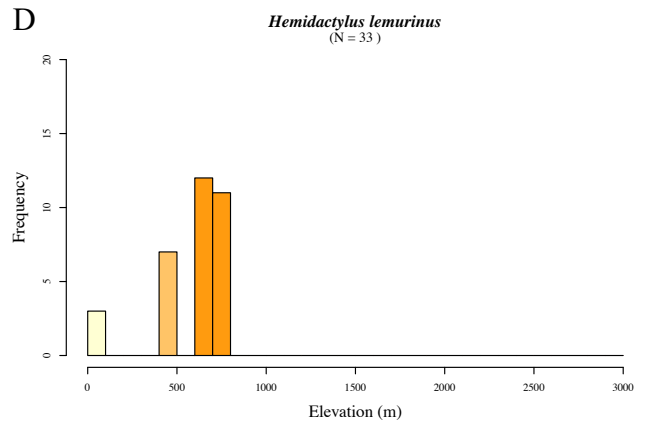

E

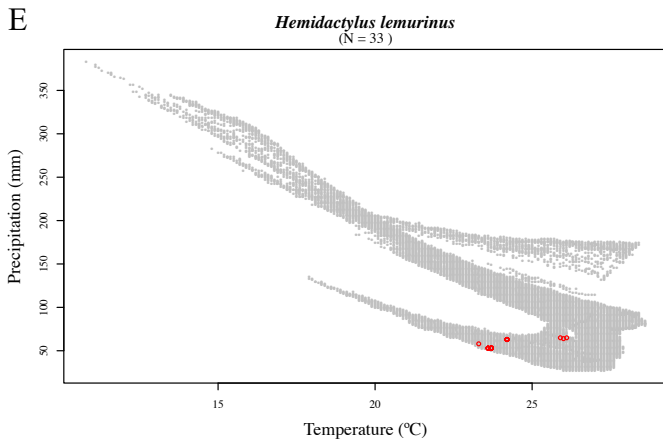

F

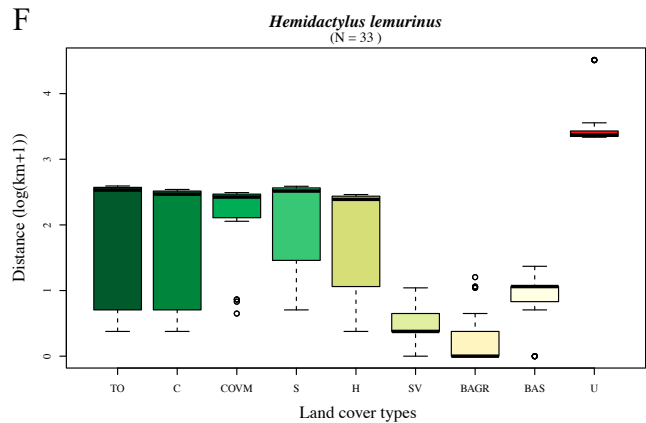

- Lizards
- Agamids
- Geckos
- Lacertids
- Skinks
- Amphisbaenids
- Varanids
- Snakes
- Boidae
- Colubridae
- Elapidae
- Lamprophiidae
- Leptotyphlopidae
- Typhlopidae
- Viperidae

**S23: Species information**

Lizards

Geckos, Gekkonidae

*Hemidactylus leschenaultii*  
Duméril & Bibron, 1836

**B**

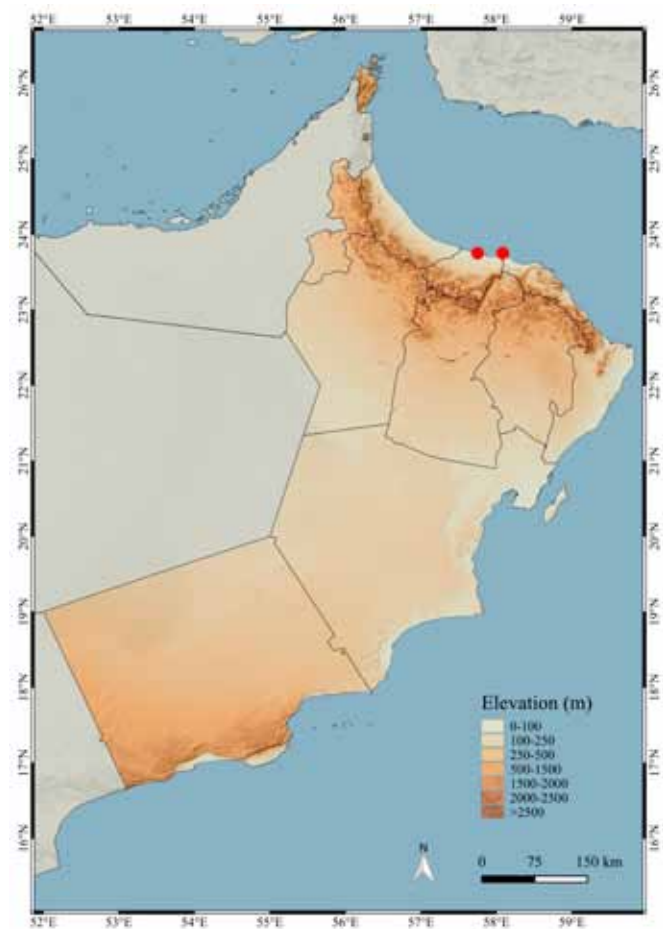

**A**

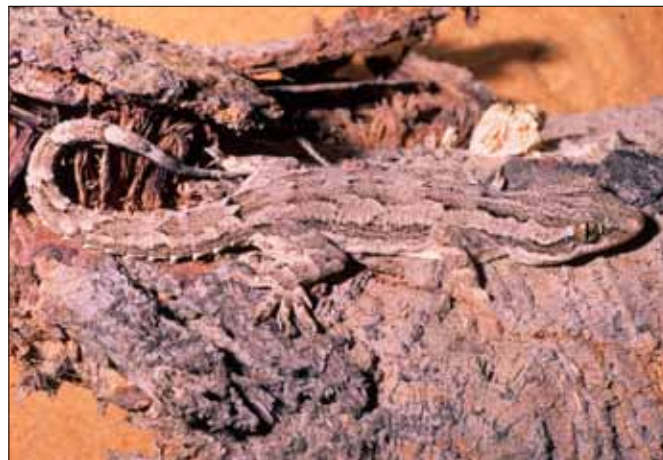

**C**

Useful information

|                             |     |
|-----------------------------|-----|
| IUCN Category               | LC* |
| Endemic                     | NO  |
| Venomous                    | NO  |
| Insular                     | NO  |
| Present in a protected area | NO  |

\*Not available on the web

**D**

*Hemidactylus leschenaultii*  
(N = 3)

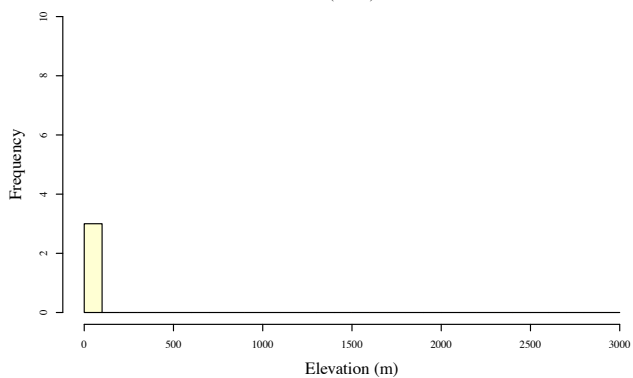

**F**

*Hemidactylus leschenaultii*  
(N = 3)

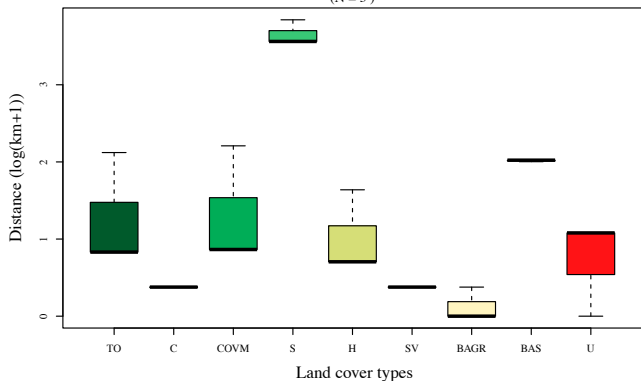

**E**

*Hemidactylus leschenaultii*  
(N = 3)

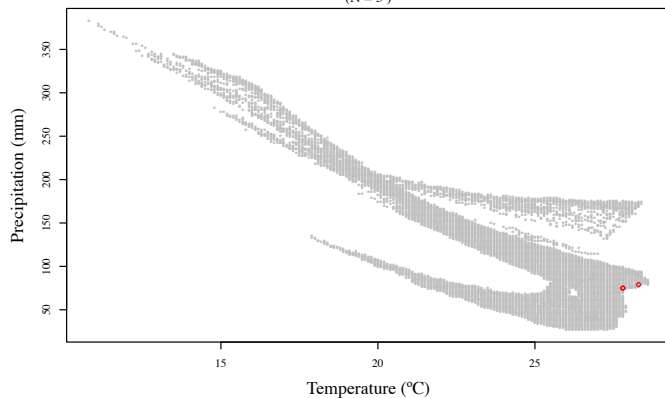

Lizards

Agamids

Geckos

Lacertids

Skinks

Amphisbaenids

Varamids

Snakes

Boidae

Colubridae

Elapidae

Lamprophiidae

Leptotyphlopidae

Typhlopidae

Viperidae

***Hemidactylus luqueorum***  
Carranza & Arnold, 2012

**S24: Species information**

Lizards

Geckos, Gekkonidae

A

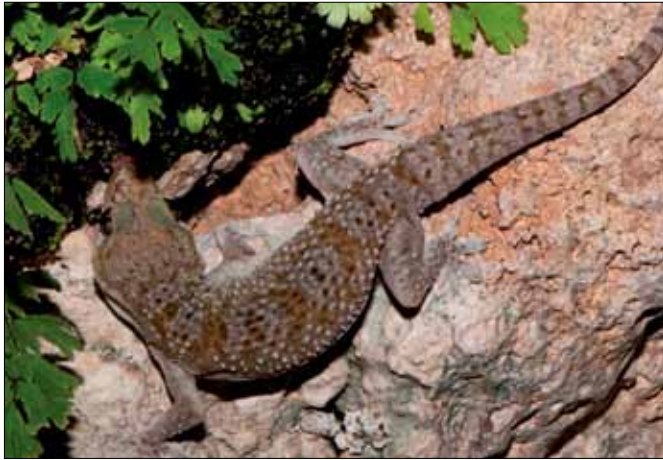

B

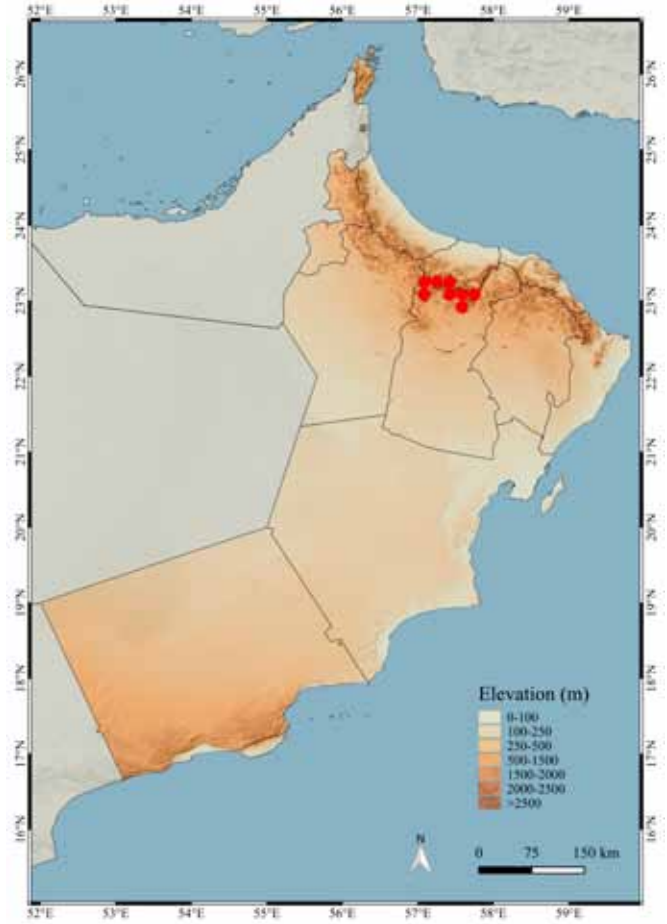

C

Useful information

|                             |     |
|-----------------------------|-----|
| IUCN Category               | NE  |
| Endemic                     | YES |
| Venomous                    | NO  |
| Insular                     | NO  |
| Present in a protected area | NO  |

D

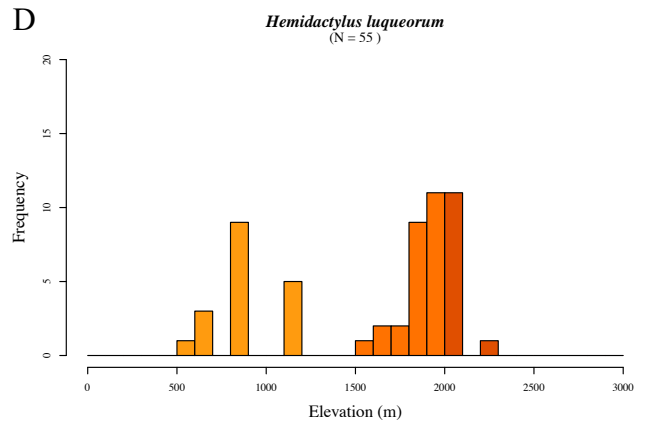

E

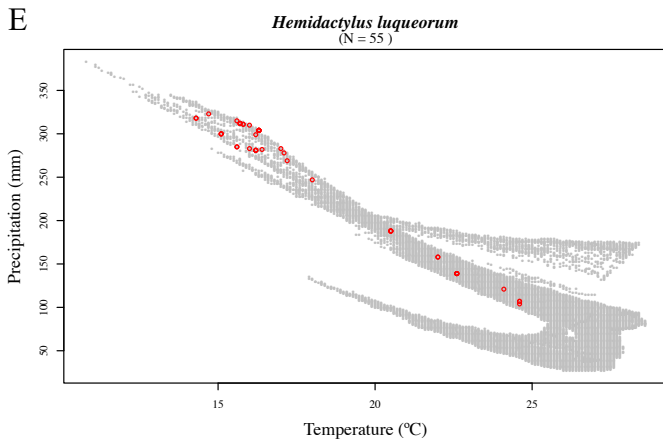

F

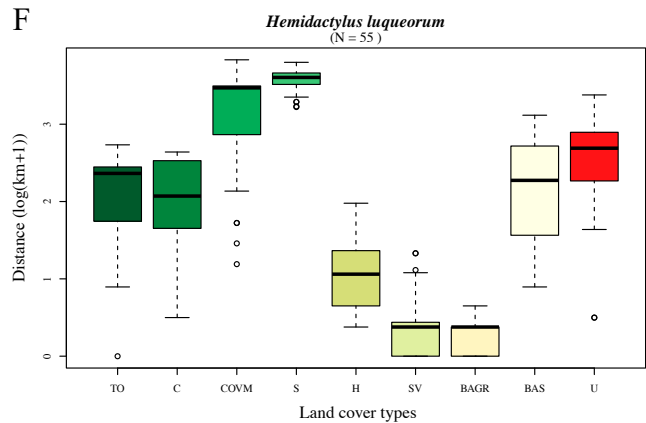



**S25: Species information**

Lizards

Geckos, Gekkonidae

*Hemidactylus masirahensis*  
Carranza & Arnold, 2012

**B**

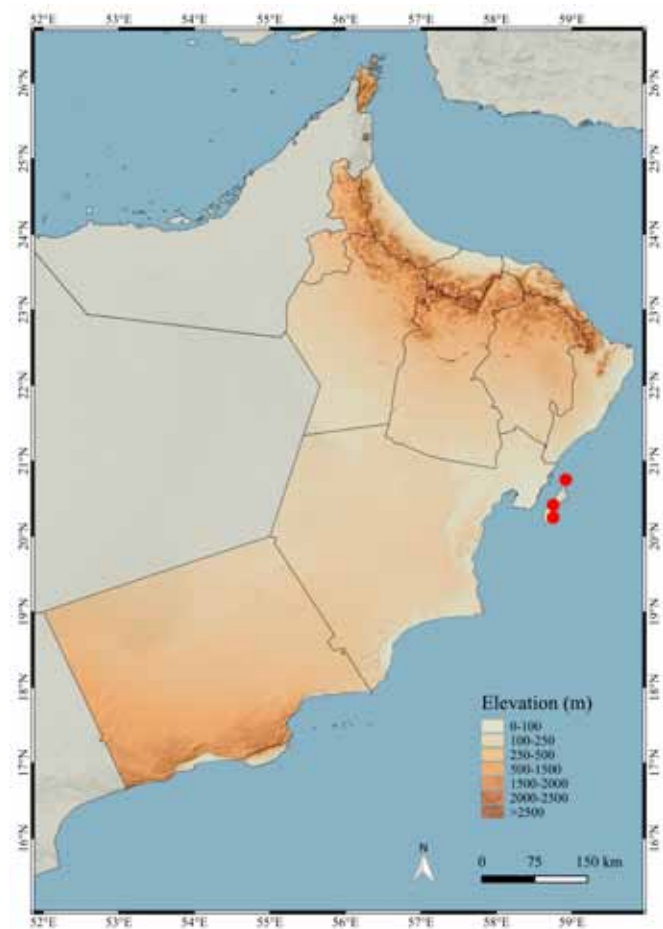

**A**

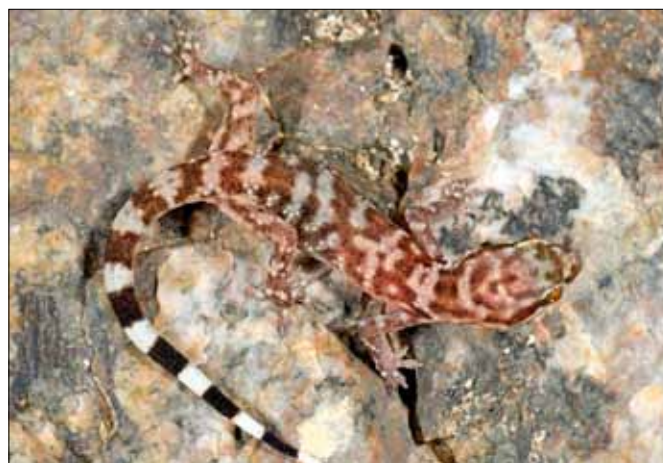

**C**

Useful information

|                             |     |
|-----------------------------|-----|
| IUCN Category               | NE  |
| Endemic                     | YES |
| Venomous                    | NO  |
| Insular                     | YES |
| Present in a protected area | NO  |

**D**

*Hemidactylus masirahensis*  
(N = 10)

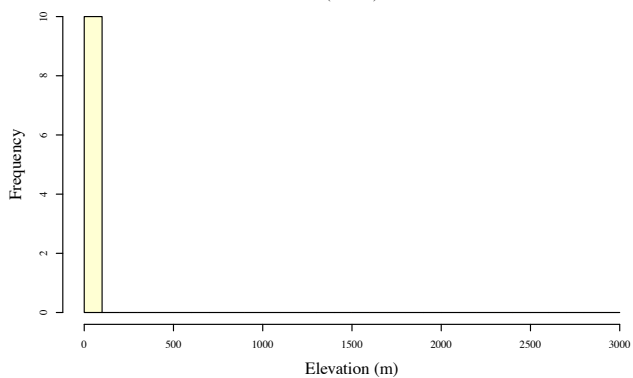

**E**

*Hemidactylus masirahensis*  
(N = 10)

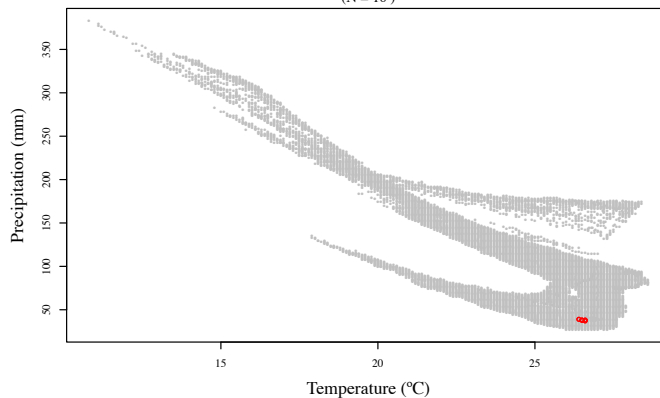

**F**

*Hemidactylus masirahensis*  
(N = 10)

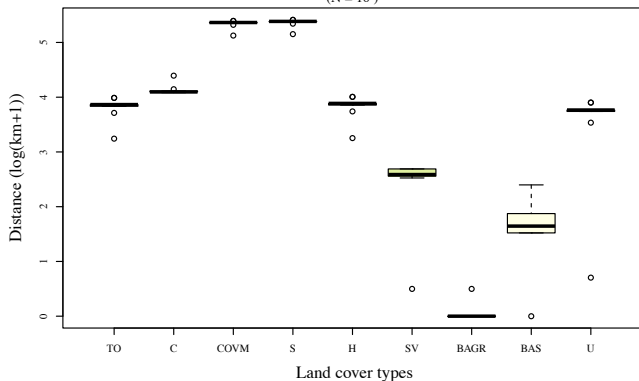

Lizards

Agamids

Geckos

Lacertids

Skinks

Amphisbaenids

Varamids

Snakes

Boidae

Colubridae

Elapidae

Lamprophiidae

Leptotyphlopidae

Typhlopidae

Viperidae

***Hemidactylus minutus***  
**Vasconcelos & Carranza, 2014**

**S26: Species information**

Lizards  
 Geckos, Gekkonidae

A

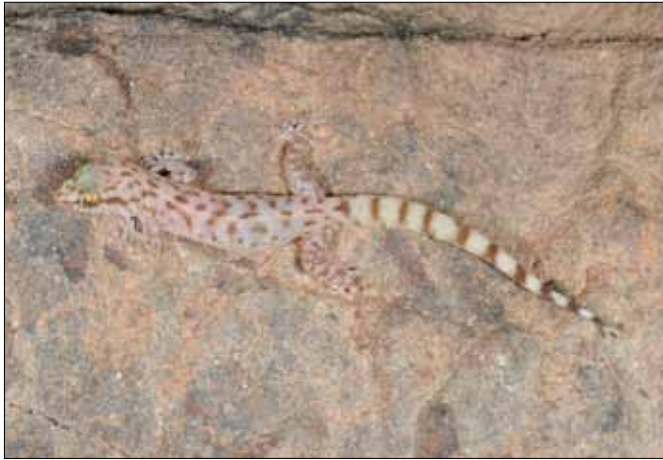

B

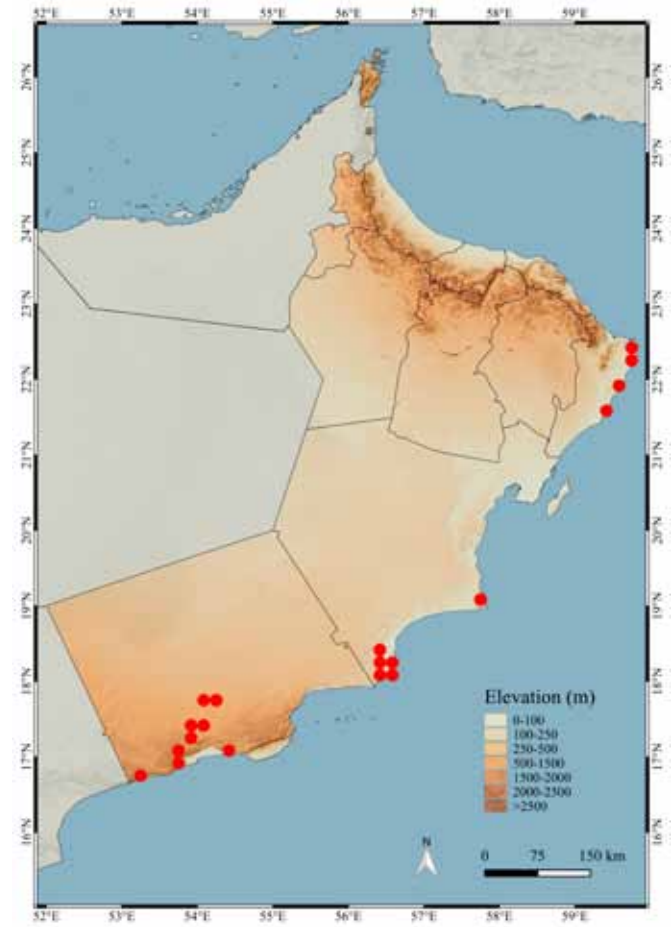

C

Useful information

|                             |     |
|-----------------------------|-----|
| IUCN Category               | NE  |
| Endemic                     | NO  |
| Venomous                    | NO  |
| Insular                     | NO  |
| Present in a protected area | YES |

D

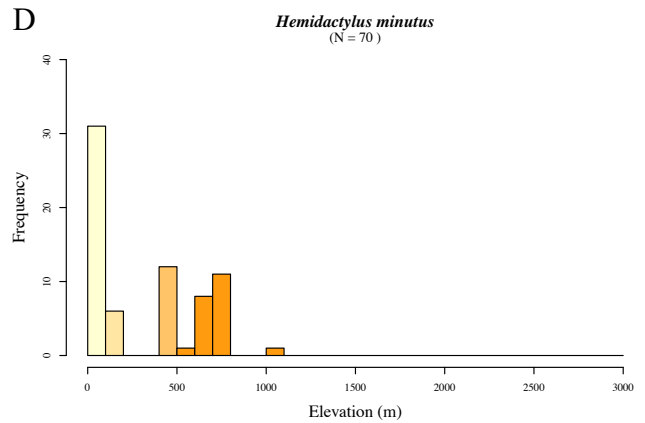

E

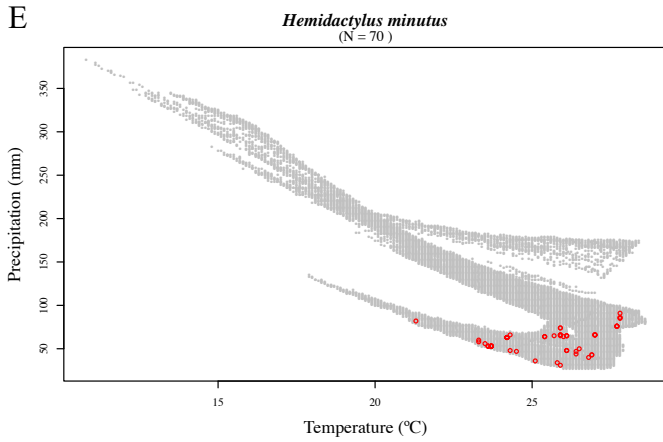

F

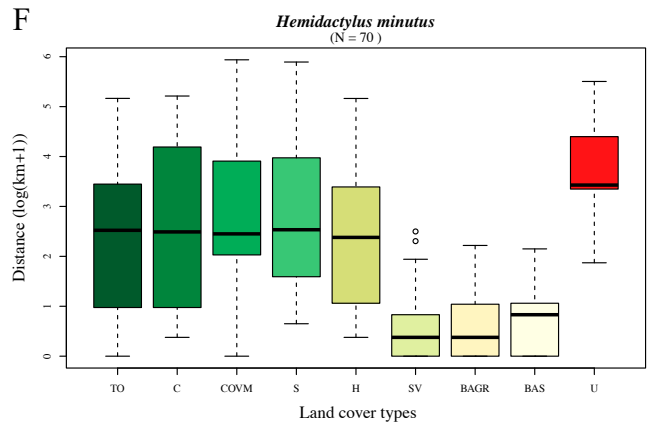

**S27: Species information**

Lizards

Geckos, Gekkonidae

*Hemidactylus paucituberculatus*  
Carranza & Arnold, 2012

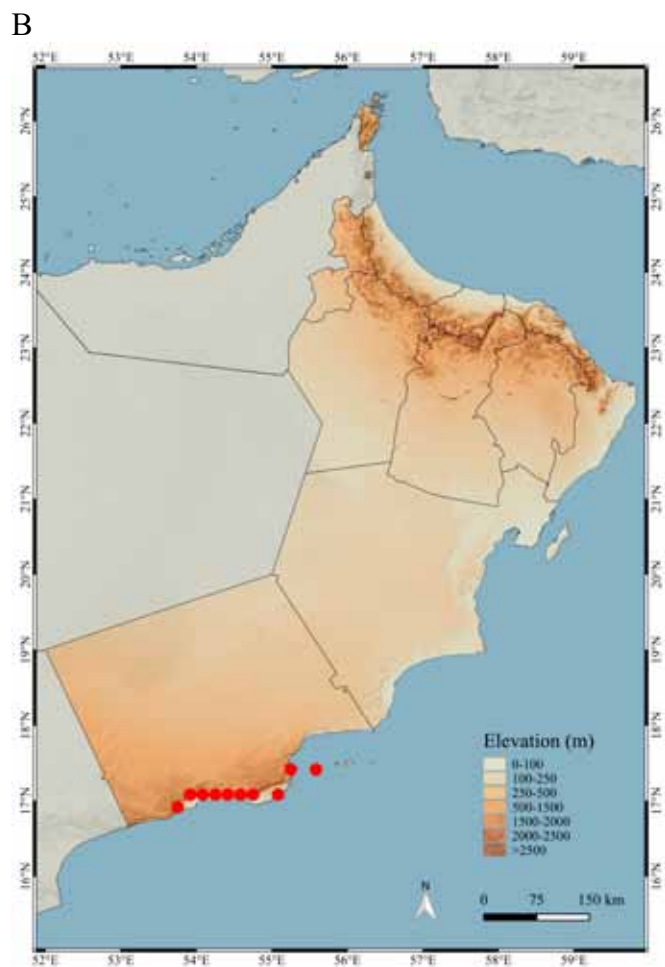

**A**

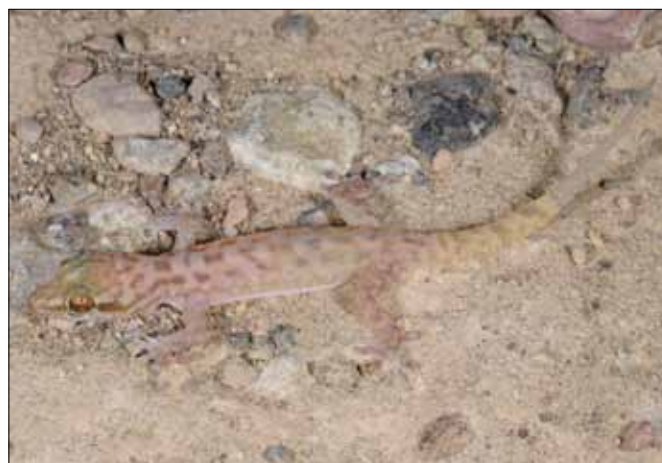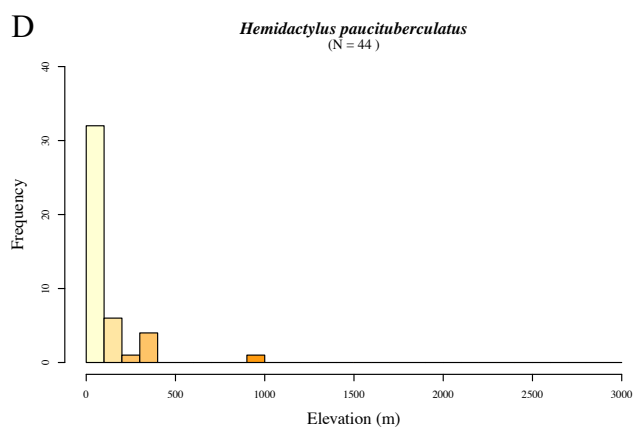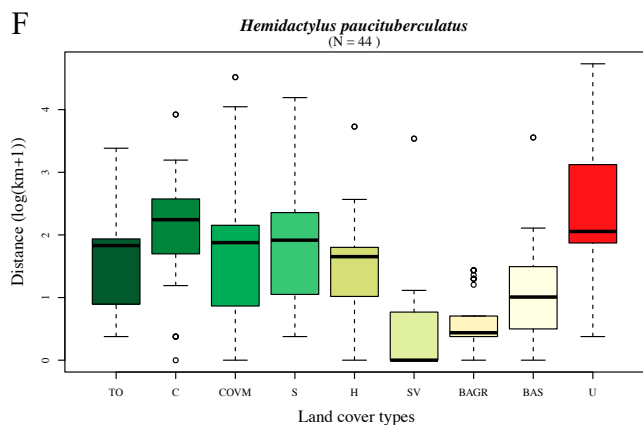

**C**

Useful information

|                             |     |
|-----------------------------|-----|
| IUCN Category               | NE  |
| Endemic                     | YES |
| Venomous                    | NO  |
| Insular                     | YES |
| Present in a protected area | YES |

**E**

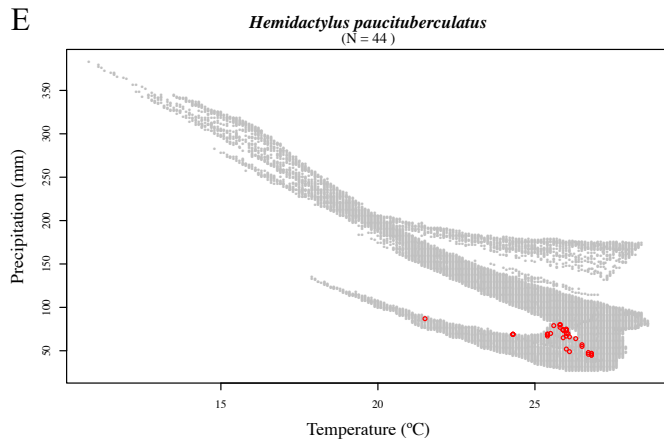

Lizards

Agamids

Geckos

Lacertids

Skinks

Amphisbaenids

Varamids

Snakes

Boidae

Colubridae

Elapidae

Lamprophiidae

Leptotyphlopidae

Typhlopidae

Viperidae

***Hemidactylus persicus***  
Anderson, 1872

**S28: Species information**

Lizards  
Geckos, Gekkonidae

A

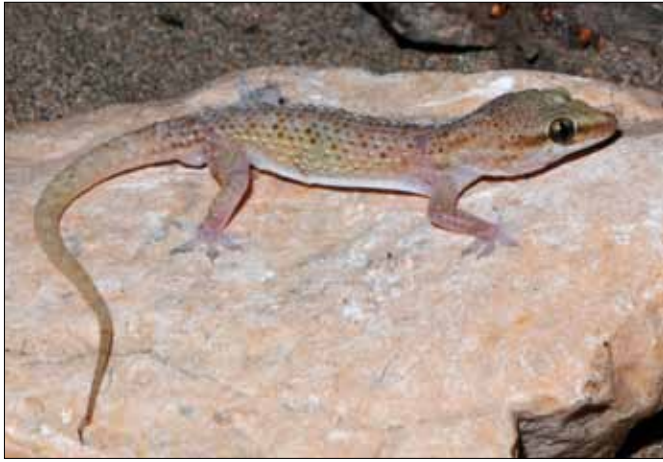

B

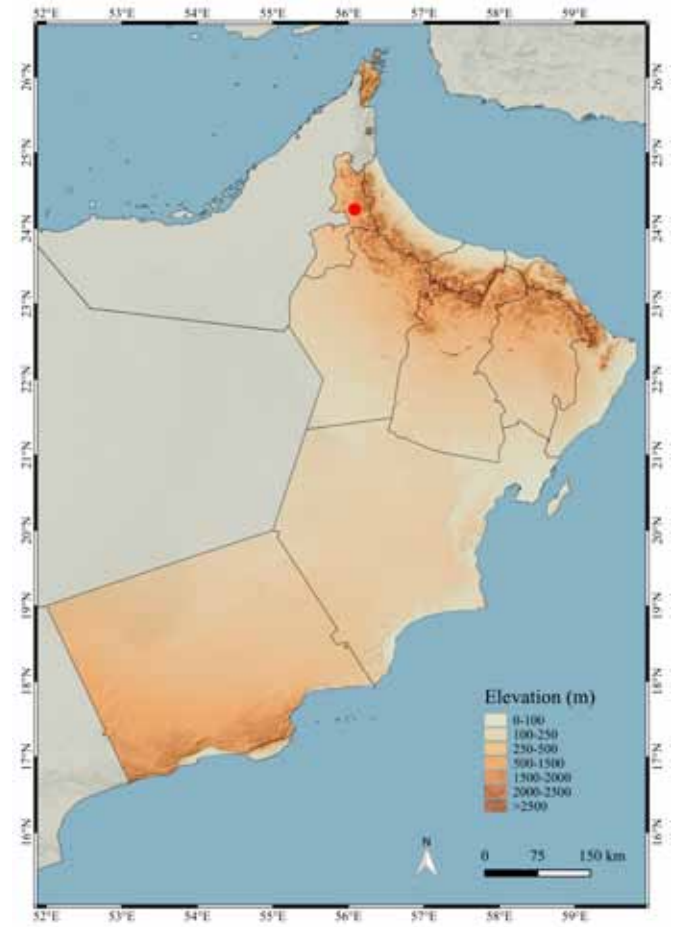

C

Useful information

|                             |     |
|-----------------------------|-----|
| IUCN Category               | LC* |
| Endemic                     | NO  |
| Venomous                    | NO  |
| Insular                     | NO  |
| Present in a protected area | NO  |

\*Not available on the web

D

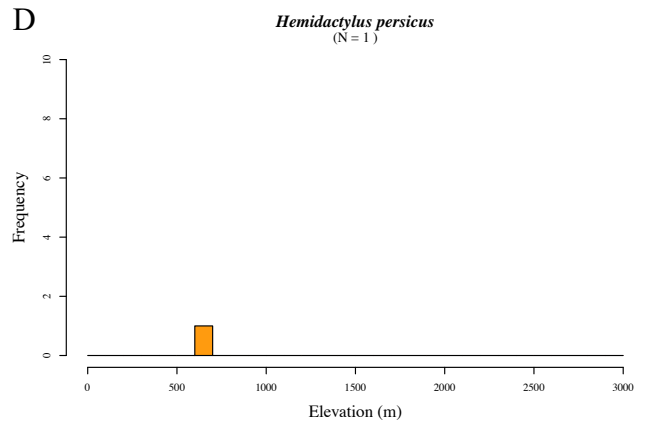

E

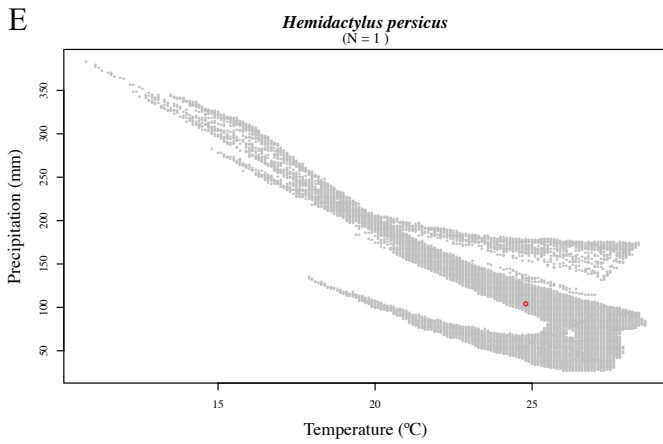

F

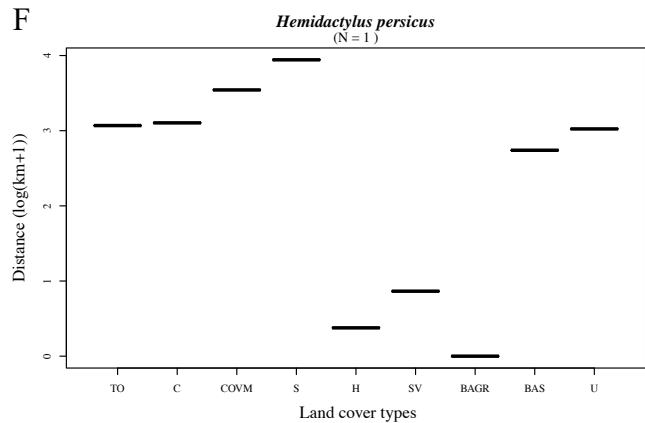

- Lizards
- Agamids
- Geckos**
- Lacertids
- Skinks
- Amphisbaenids
- Varanids
- Snakes
- Boidae
- Colubridae
- Elapidae
- Lamprophiidae
- Leptotyphlopidae
- Typhlopidae
- Viperidae

**S29: Species information**

Lizards  
Geckos, Gekkonidae

*Hemidactylus robustus*  
Heyden, 1827

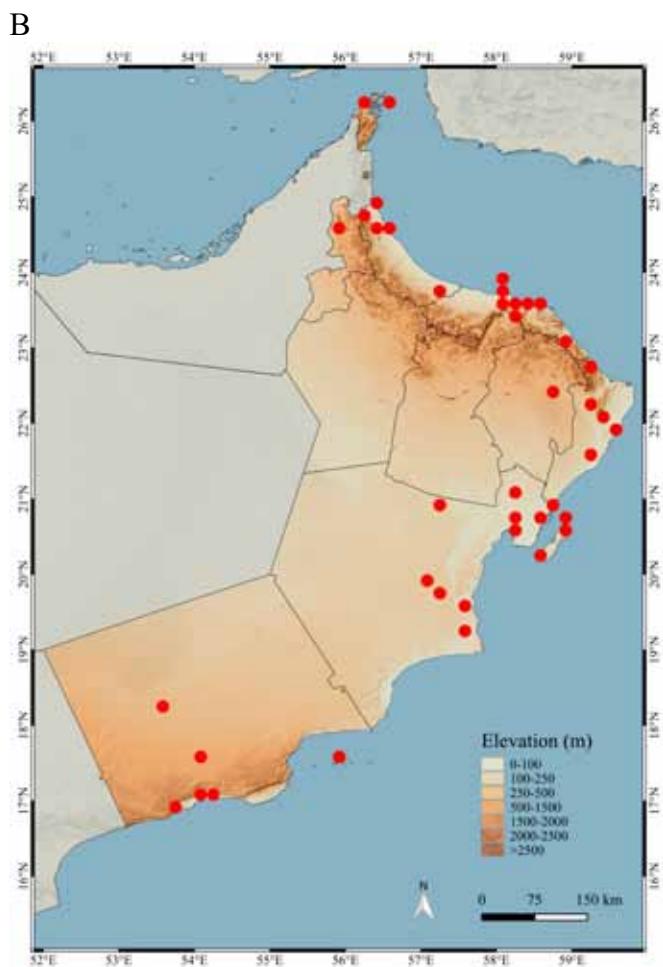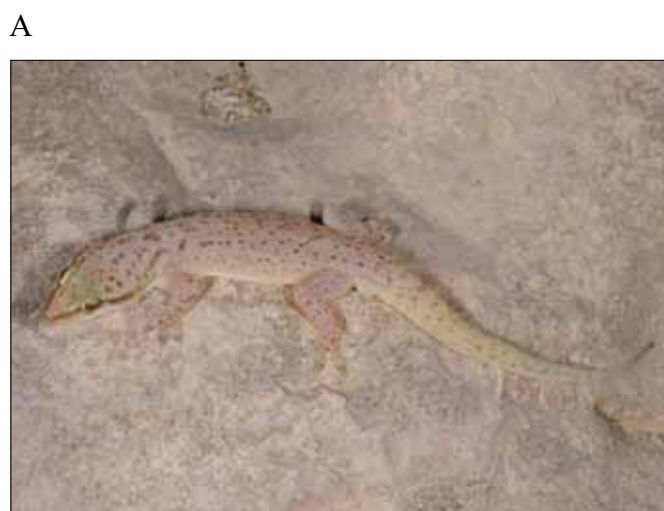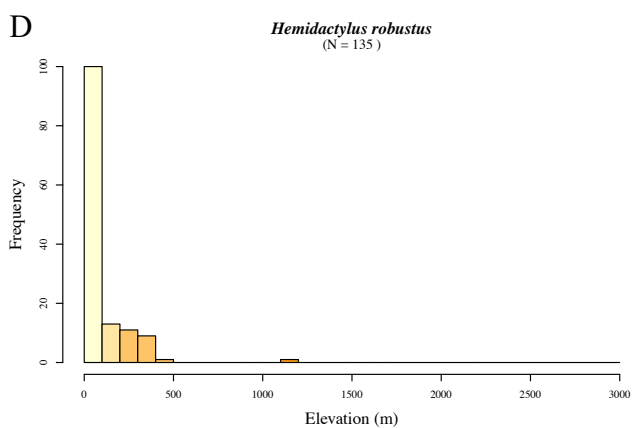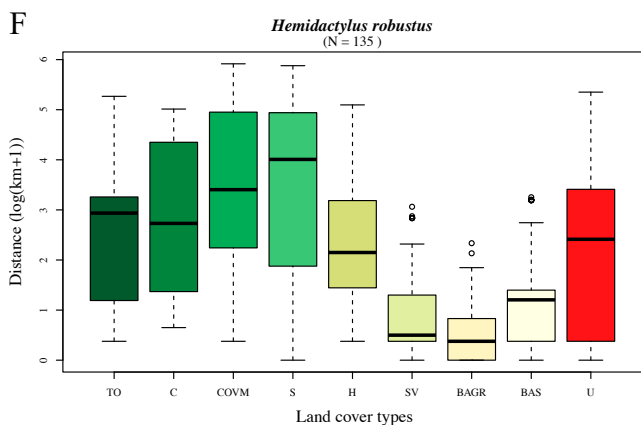

**C**

Useful information

|                             |     |
|-----------------------------|-----|
| IUCN Category               | LC* |
| Endemic                     | NO  |
| Venomous                    | NO  |
| Insular                     | YES |
| Present in a protected area | YES |

\*Not available on the web

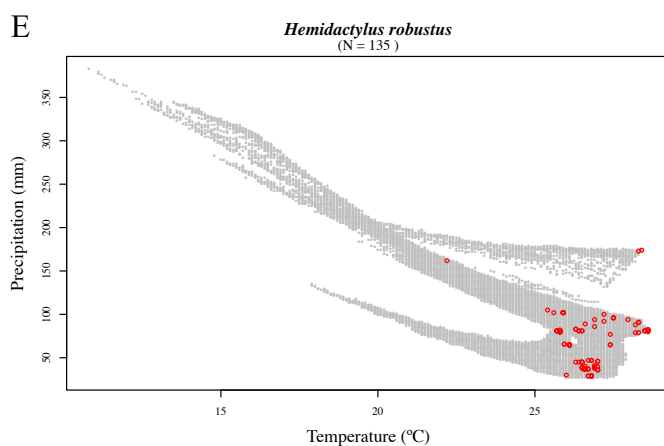

- Lizards
- Agamids
- Geckos**
- Lacertids
- Skinks
- Amphisbaenids
- Varamids
- Snakes
- Boidae
- Colubridae
- Elapidae
- Lamprophiidae
- Leptotyphlopidae
- Typhlopidae
- Viperidae

- Lizards
- Agamids
- Gekkos
- Lacertids
- Skinks
- Amphisbaenids
- Varanids
- Snakes
- Boidae
- Colubridae
- Elapidae
- Lamprophiidae
- Leptotyphlopidae
- Typhlopidae
- Viperidae

***Hemidactylus* sp.**  
**Undescribed**

**S30: Species information**

Lizards  
Gekkos, Gekkonidae

A

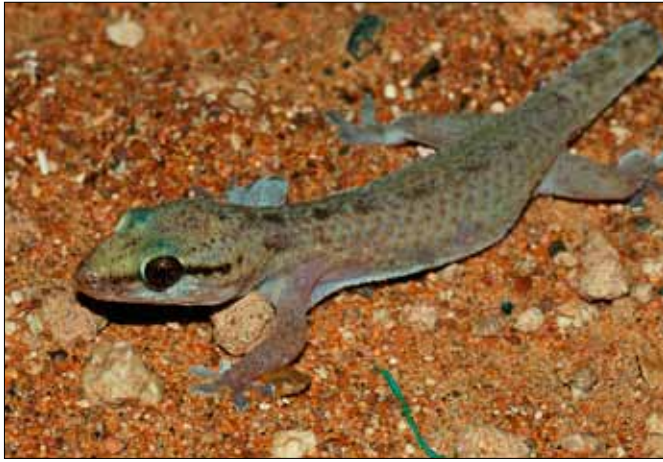

B

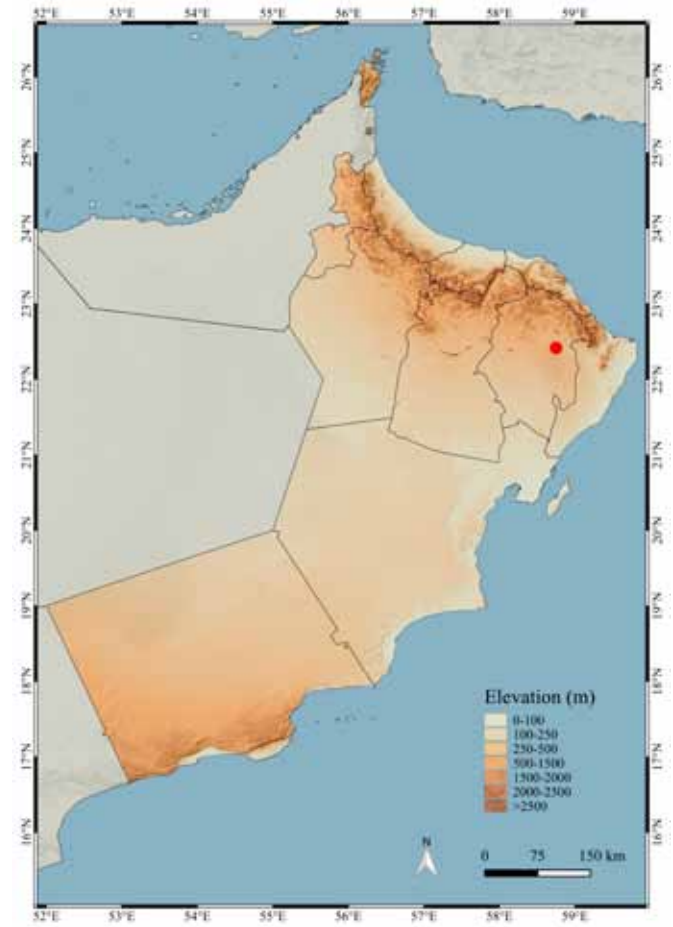

C

Useful information

|                             |     |
|-----------------------------|-----|
| IUCN Category               | NE  |
| Endemic                     | YES |
| Venomous                    | NO  |
| Insular                     | NO  |
| Present in a protected area | NO  |

D

*Hemidactylus* sp.  
(N = 1)

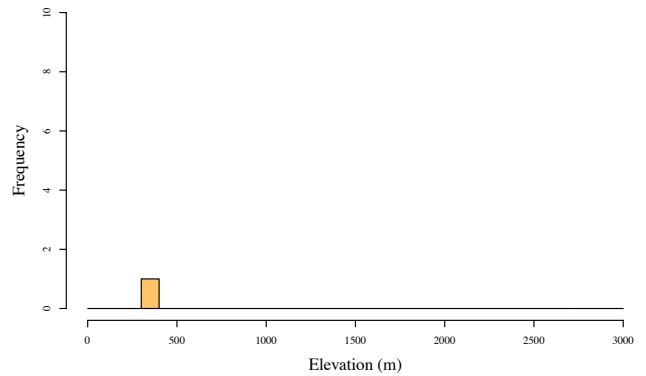

E

*Hemidactylus* sp.  
(N = 1)

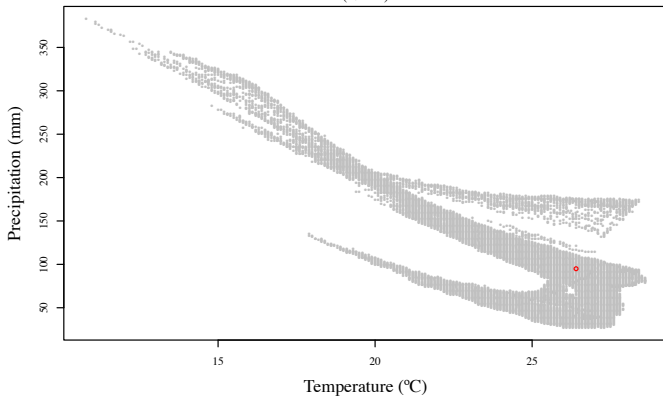

F

*Hemidactylus* sp.  
(N = 1)

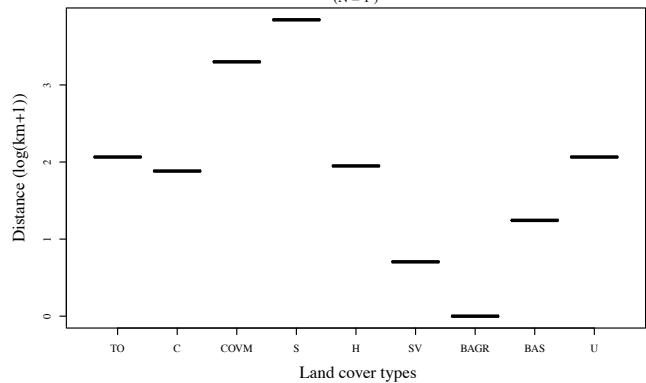

### S31: Species information

Lizards

Geckos, Gekkonidae

### *Pseudoceramodactylus khobarensis*

Haas, 1857

B

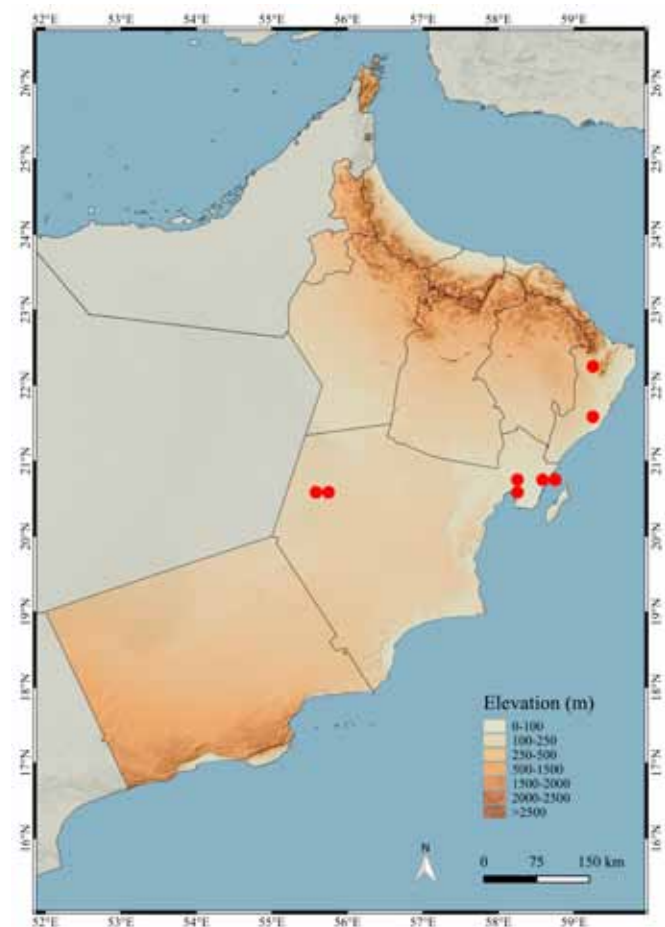

A

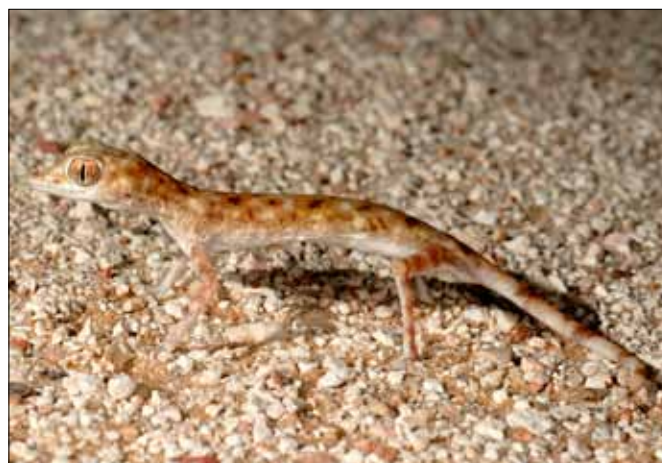

D

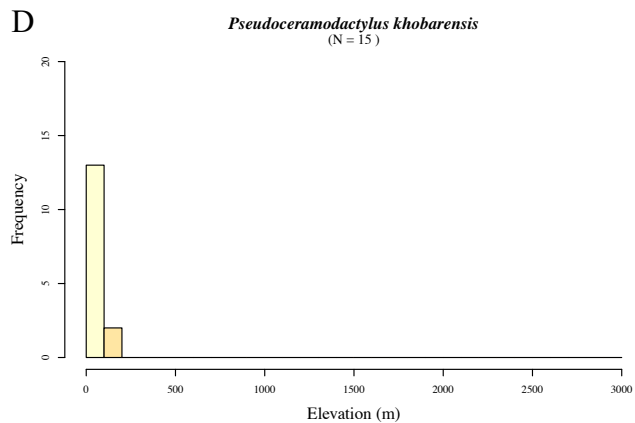

F

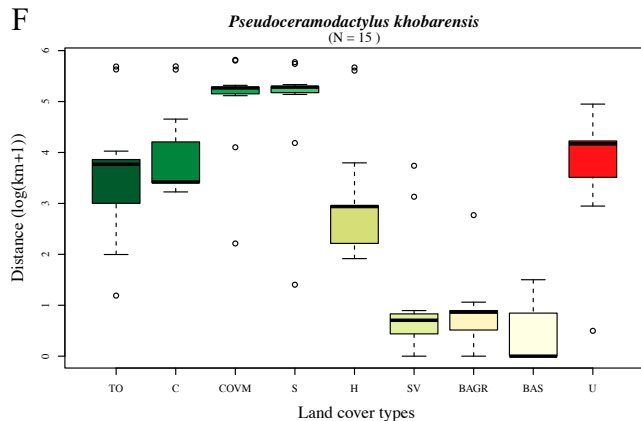

C

Useful information

|                             |     |
|-----------------------------|-----|
| IUCN Category               | LC  |
| Endemic                     | NO  |
| Venomous                    | NO  |
| Insular                     | NO  |
| Present in a protected area | YES |

E

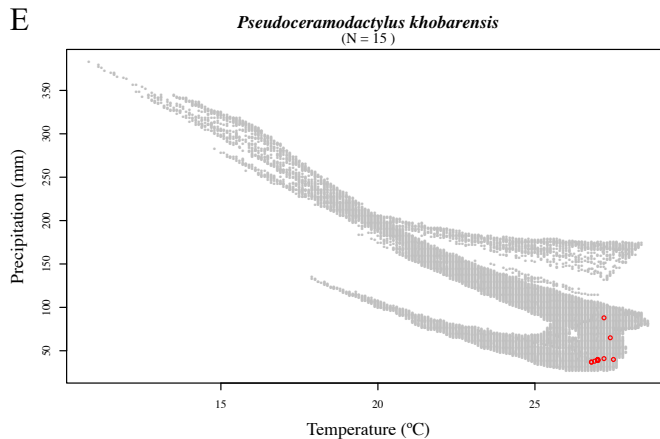

Lizards

Agamids

Geckos

Lacertids

Skinks

Amphisbaenids

Varamids

Snakes

Boidae

Colubridae

Elapidae

Lamprophiidae

Leptotyphlopidae

Typhlopidae

Viperidae

***Stenodactylus arabicus***  
(Haas, 1957)

**S32: Species information**

Lizards  
Geckos, Gekkonidae

A

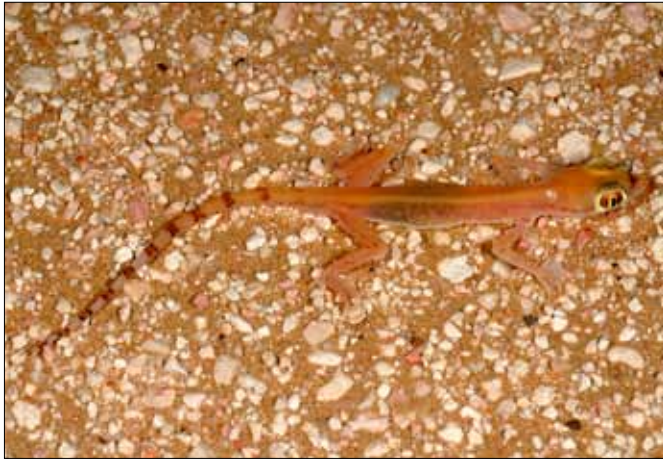

B

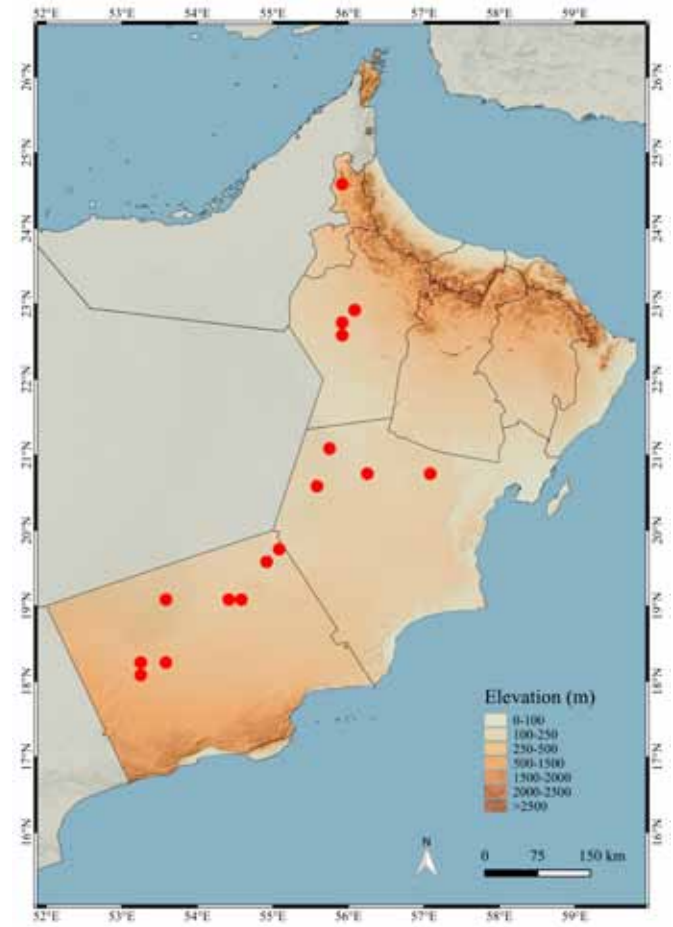

C

Useful information

|                             |    |
|-----------------------------|----|
| IUCN Category               | LC |
| Endemic                     | NO |
| Venomous                    | NO |
| Insular                     | NO |
| Present in a protected area | NO |

D

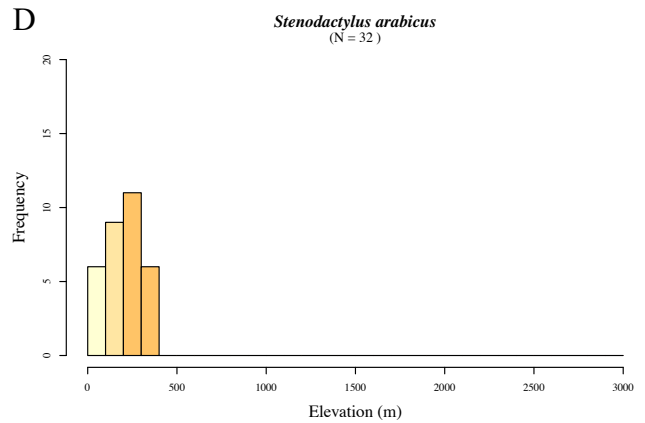

E

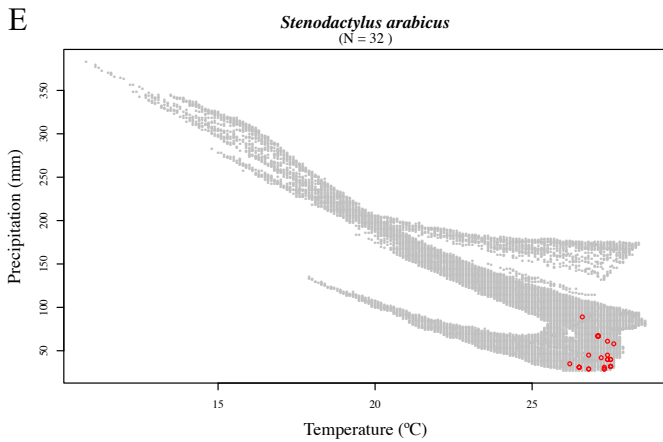

F

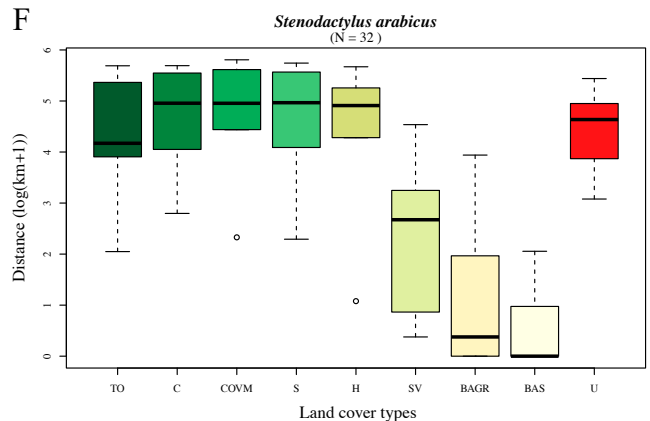



### S33: Species information

Lizards

Geckos, Gekkonidae

## *Stenodactylus doriae* (Blanford, 1874)

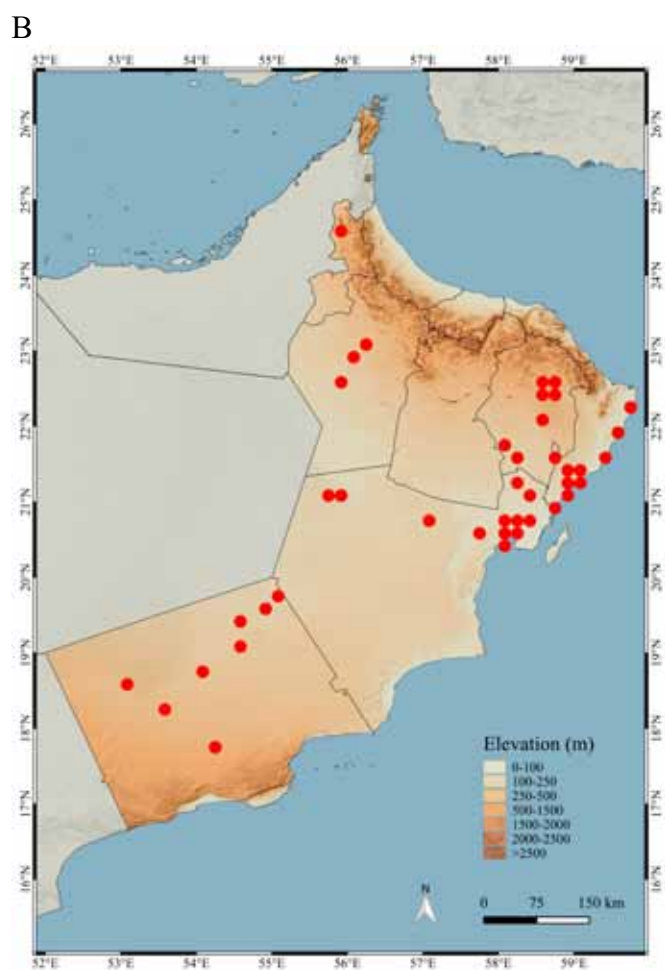

**A**

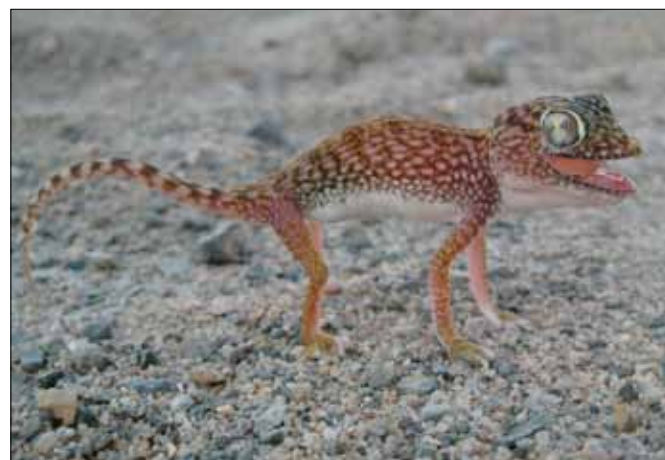

**C**

#### Useful information

|                             |     |
|-----------------------------|-----|
| IUCN Category               | LC  |
| Endemic                     | NO  |
| Venomous                    | NO  |
| Insular                     | NO  |
| Present in a protected area | YES |

**D**

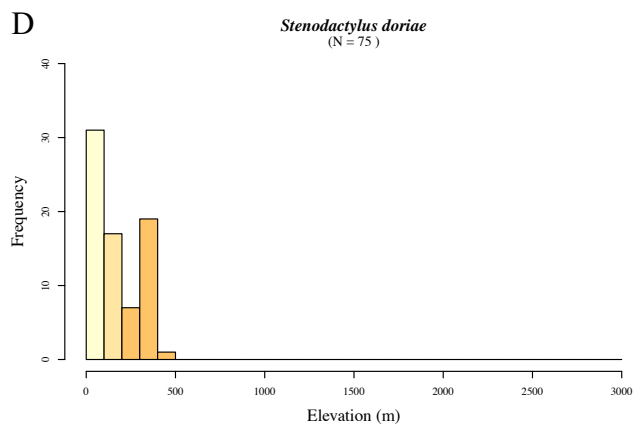

**F**

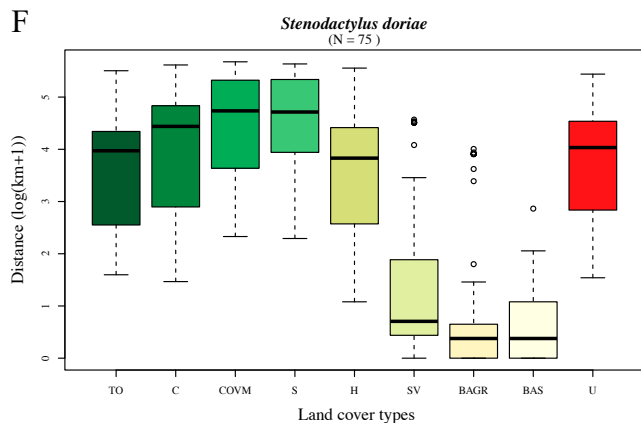

**E**

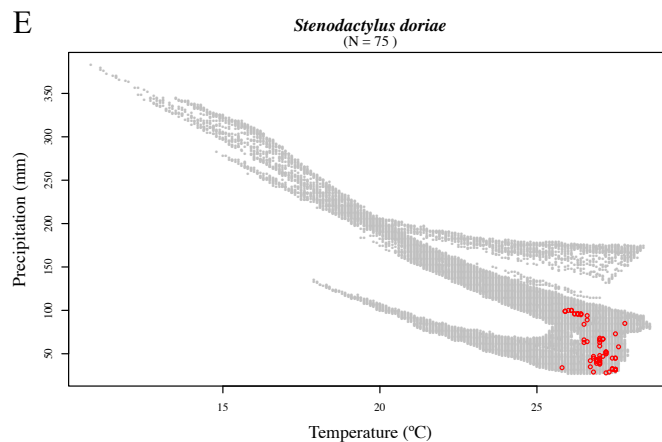

Lizards

Agamids

Geckos

Lacertids

Skinks

Amphisbaenids

Varamids

Snakes

Boidae

Colubridae

Elapidae

Lamprophiidae

Leptotyphlopidae

Typhlopidae

Viperidae

***Stenodactylus leptocosymbotes***  
 Leviton & Anderson, 1967

**S34: Species information**

Lizards

Geckos, Gekkonidae

A

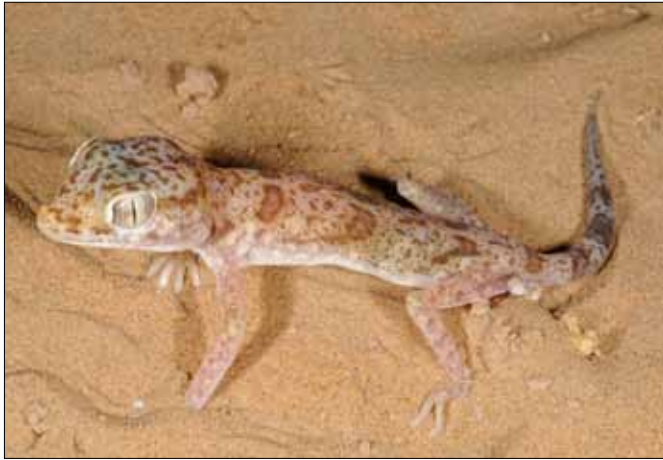

B

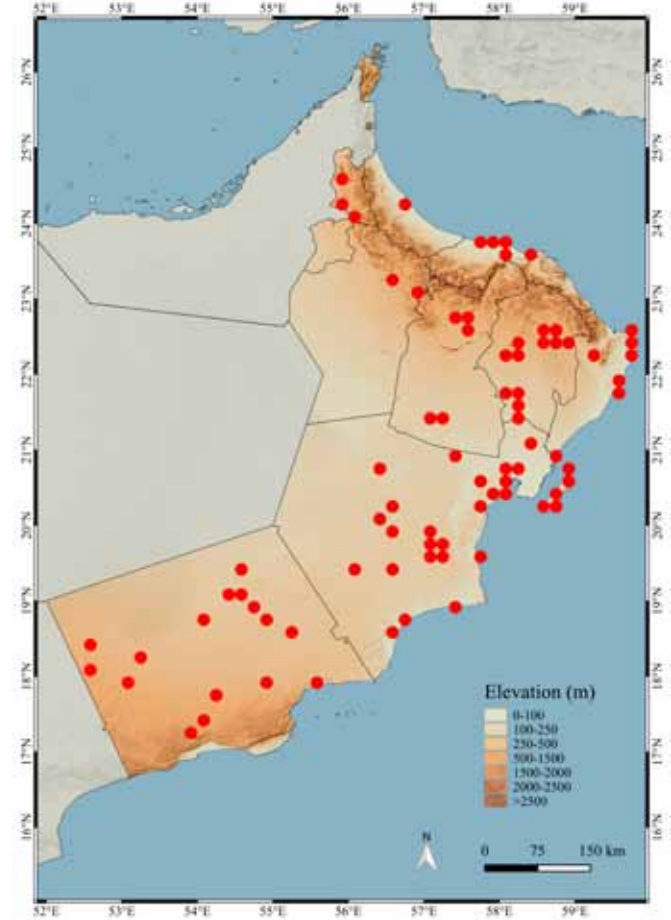

C

Useful information

|                             |     |
|-----------------------------|-----|
| IUCN Category               | LC* |
| Endemic                     | NO  |
| Venomous                    | NO  |
| Insular                     | YES |
| Present in a protected area | YES |

\*Not available on the web

D

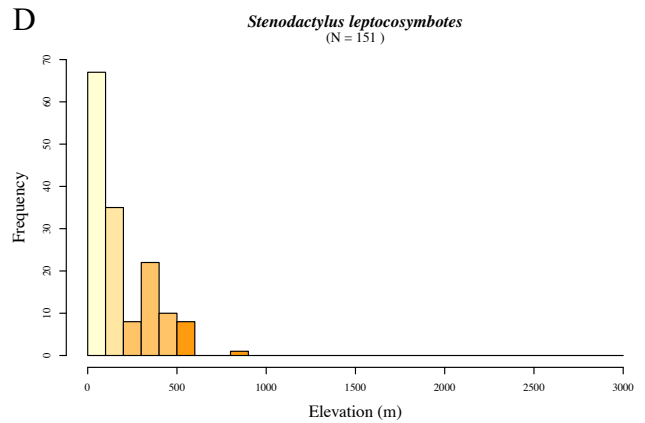

E

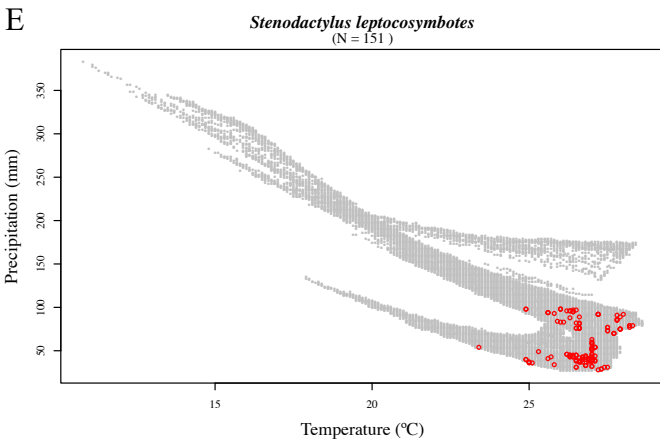

F

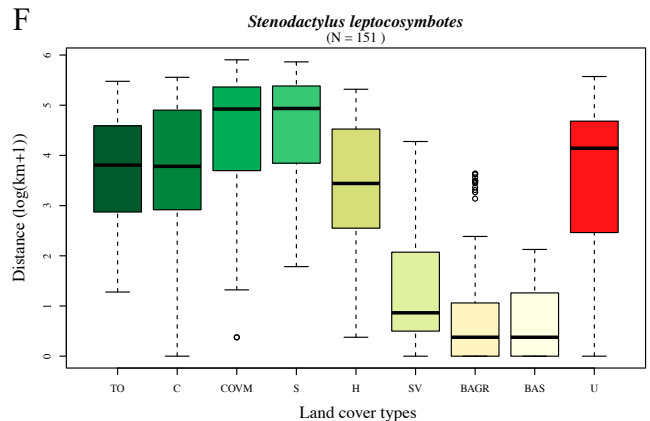

- Lizards
- Agamids
- Geckos
- Lacertids
- Skinks
- Amphisbaenids
- Varanids
- Snakes
- Boidae
- Colubridae
- Elapidae
- Lamprophiidae
- Leptotyphlopidae
- Typhlopidae
- Viperidae

**S35: Species information**

Lizards

Geckos, Gekkonidae

*Stenodactylus sharqiyahensis*  
Metallinou & Carranza, 2013

**B**

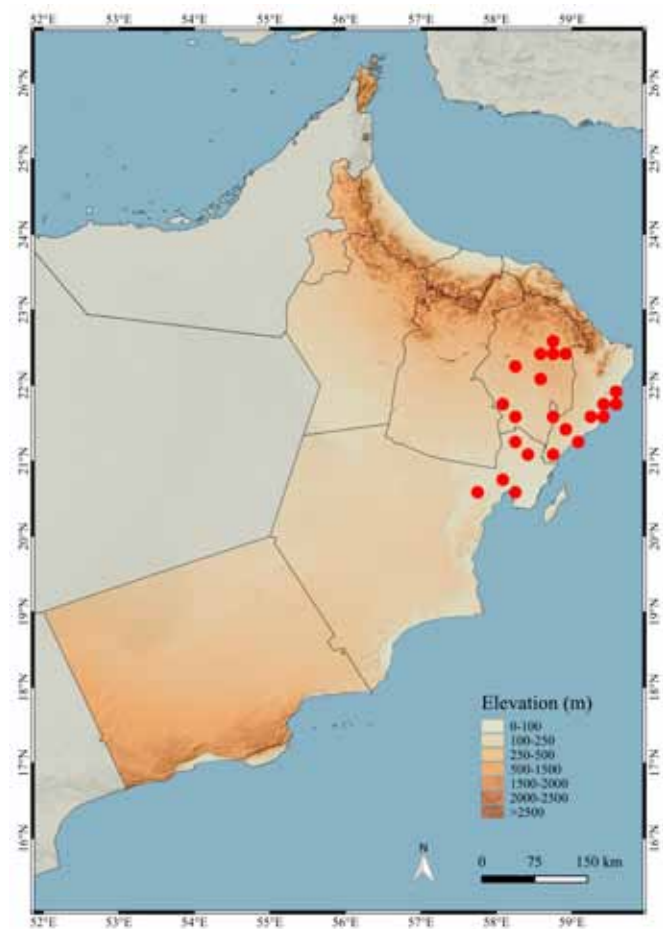

**A**

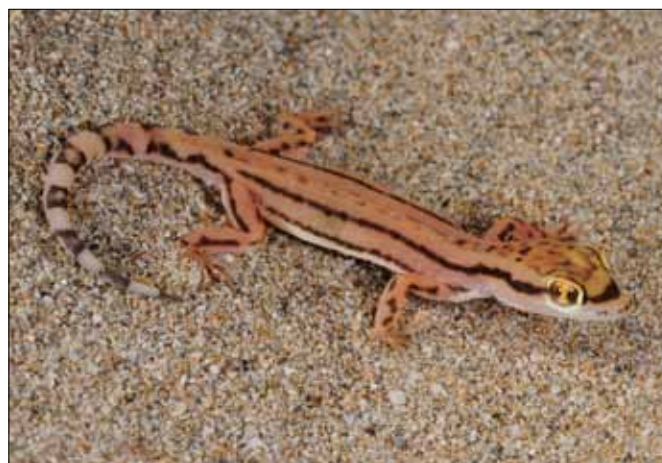

**C**

Useful information

|                             |     |
|-----------------------------|-----|
| IUCN Category               | NE  |
| Endemic                     | YES |
| Venomous                    | NO  |
| Insular                     | NO  |
| Present in a protected area | YES |

**D**

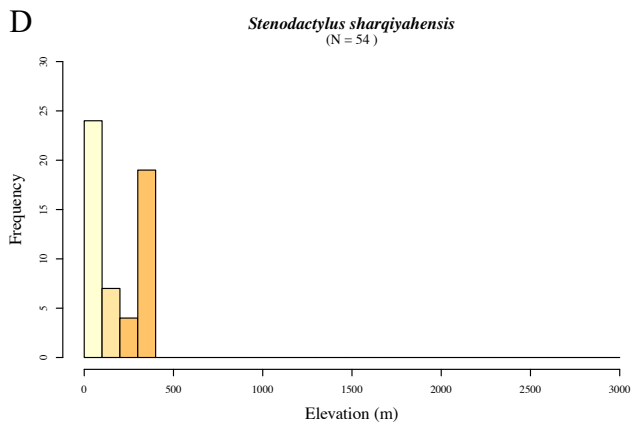

**F**

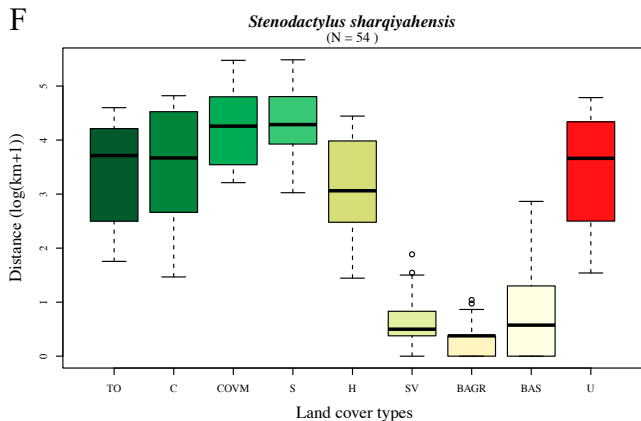

**E**

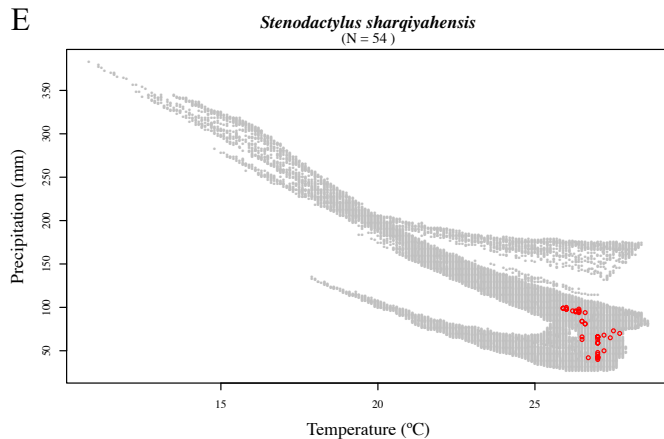

Lizards

Agamids

Geckos

Lacertids

Skinks

Amphisbaenids

Varamids

Snakes

Boidae

Colubridae

Elapidae

Lamprophiidae

Leptotyphlopidae

Typhlopidae

Viperidae

***Trachydactylus hajarensis***  
(Arnold, 1980)

**S36: Species information**

Lizards  
Geckos, Gekkonidae

A

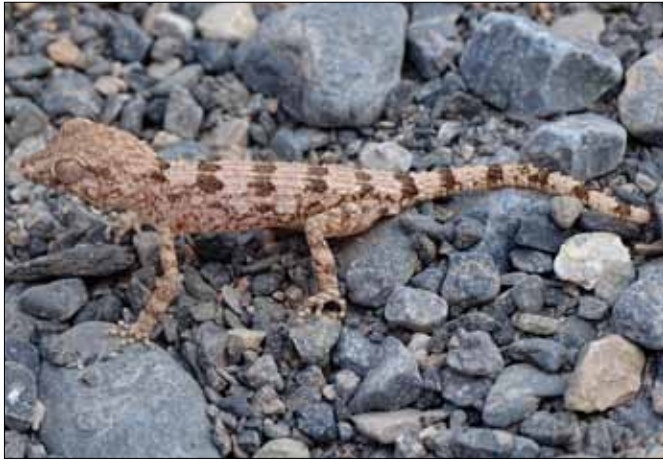

B

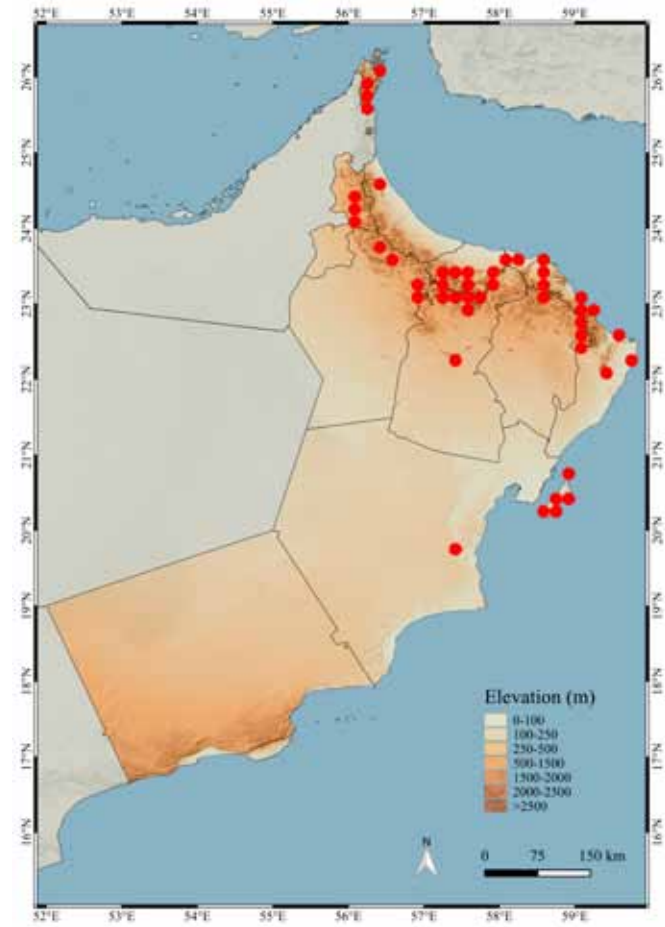

C

Useful information

|                             |     |
|-----------------------------|-----|
| IUCN Category               | NE  |
| Endemic                     | NO  |
| Venomous                    | NO  |
| Insular                     | YES |
| Present in a protected area | YES |

D

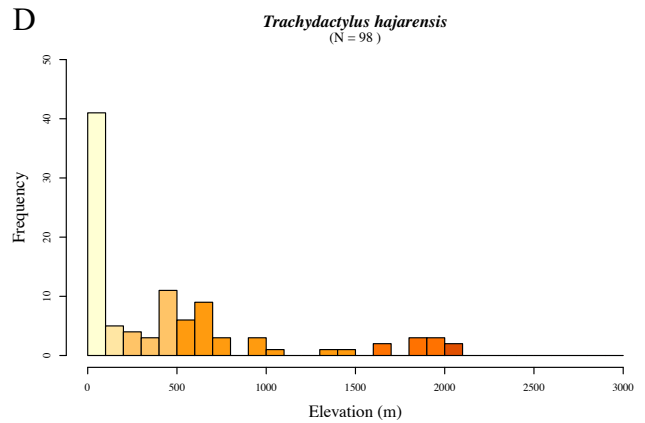

E

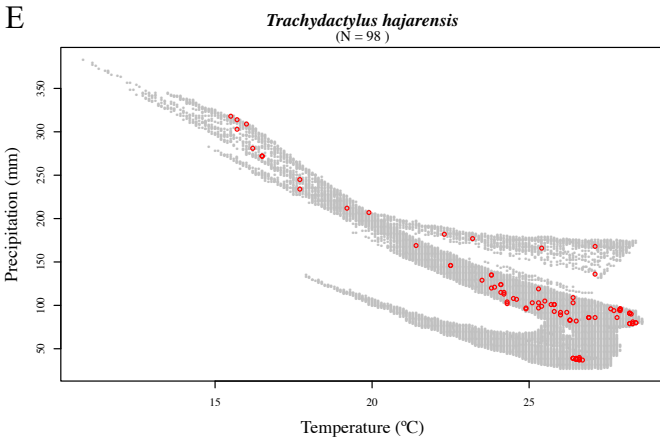

F

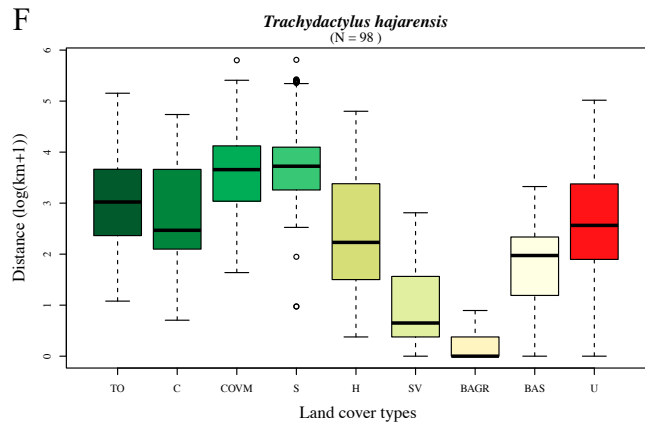

**S37: Species information**

Lizards

Geckos, Gekkonidae

*Trachydactylus spatalurus*  
(Anderson, 1901)

**B**

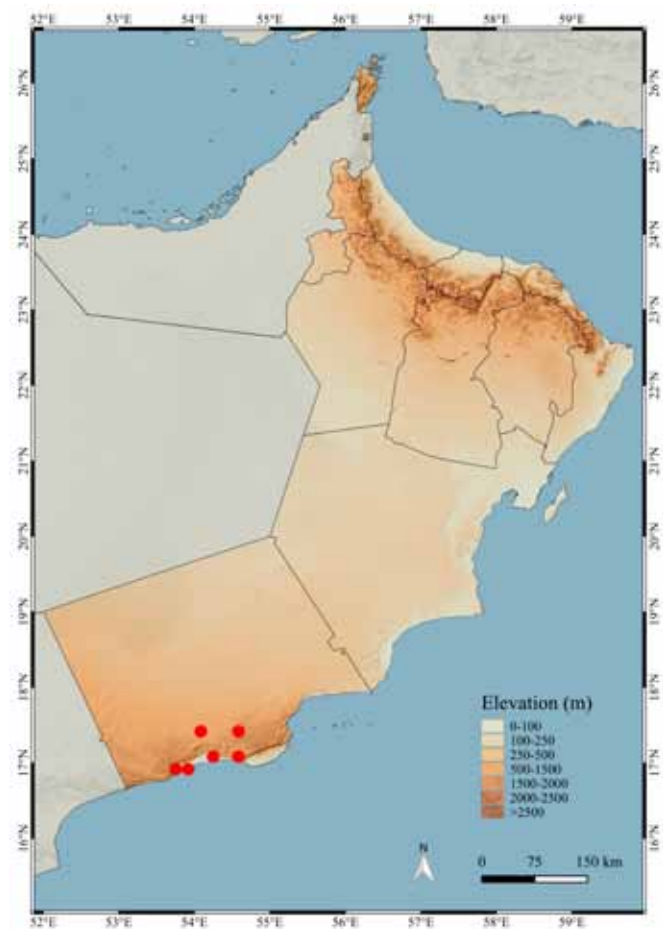

**A**

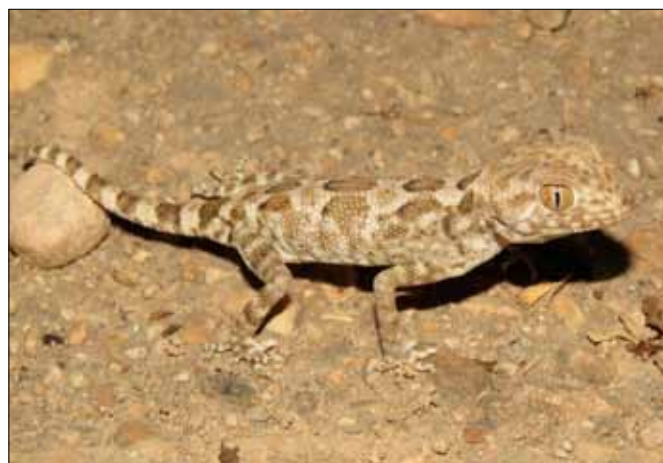

**C**

Useful information

|                             |     |
|-----------------------------|-----|
| IUCN Category               | NE  |
| Endemic                     | NO  |
| Venomous                    | NO  |
| Insular                     | NO  |
| Present in a protected area | YES |

**D**

*Trachydactylus spatalurus*  
(N = 6)

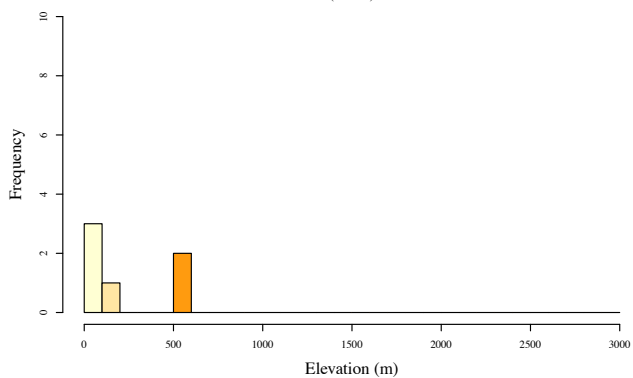

**F**

*Trachydactylus spatalurus*  
(N = 6)

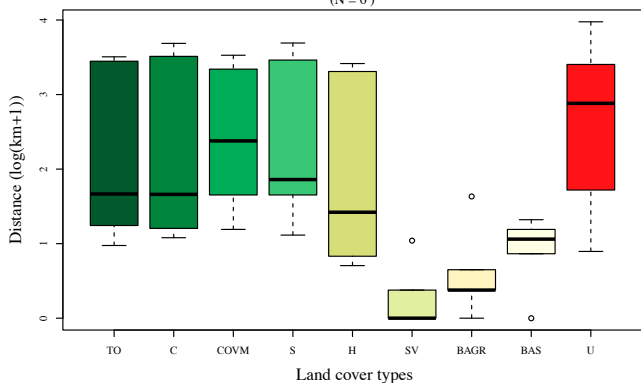

**E**

*Trachydactylus spatalurus*  
(N = 6)

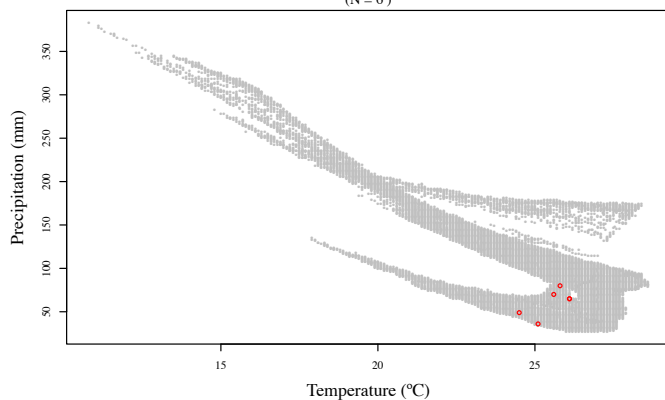

Lizards

Agamids

Geckos

Lacertids

Skinks

Amphisbaenids

Varamids

Snakes

Boidae

Colubridae

Elapidae

Lamprophiidae

Leptotyphlopidae

Typhlopidae

Viperidae

***Tropicolotes scortecci***  
Cherchi & Spano, 1963

**S38: Species information**

Lizards

Geckos, Gekkonidae

A

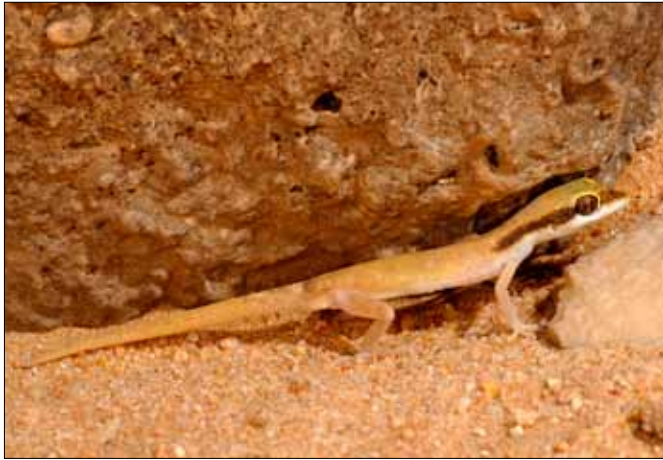

B

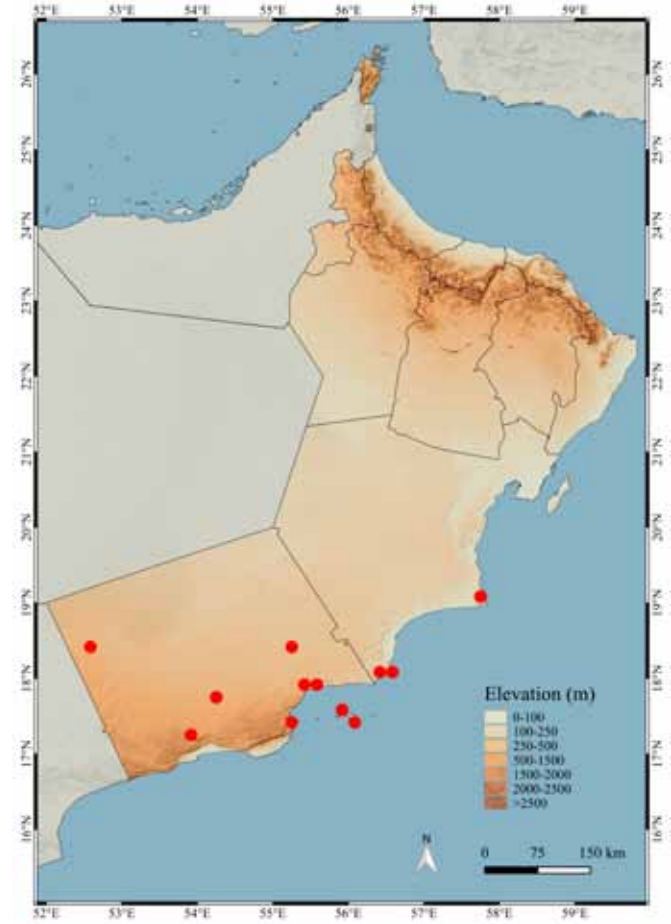

C

Useful information

|                             |     |
|-----------------------------|-----|
| IUCN Category               | LC  |
| Endemic                     | NO  |
| Venomous                    | NO  |
| Insular                     | YES |
| Present in a protected area | YES |

D

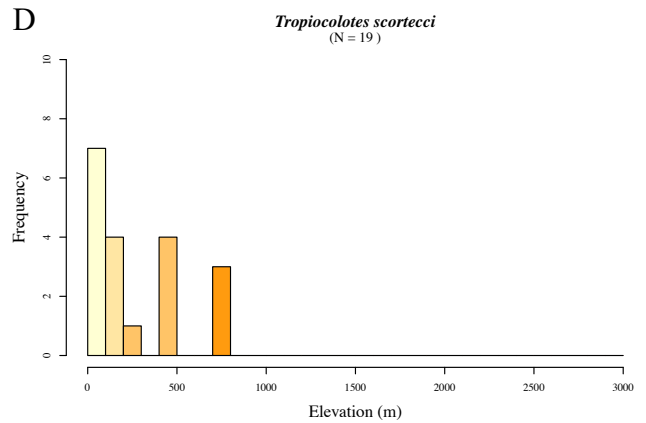

E

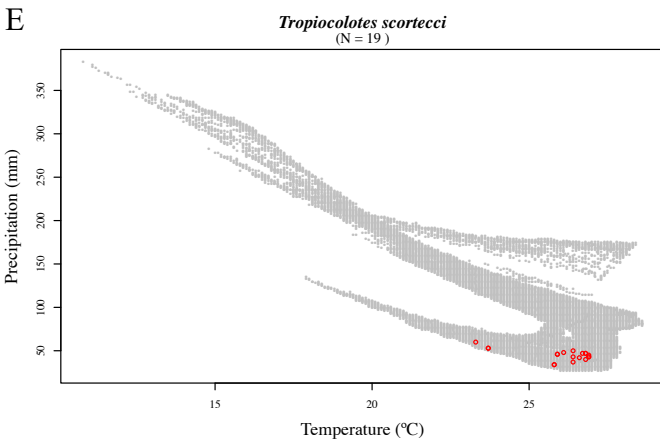

F

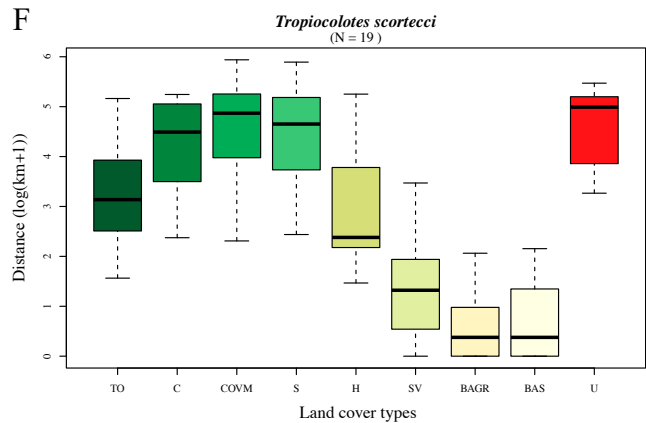

- Lizards
- Agamids
- Geckos
- Lacertids
- Skinks
- Amphisbaenids
- Varanids
- Snakes
- Boidae
- Colubridae
- Elapidae
- Lamprophiidae
- Leptotyphlopidae
- Typhlopidae
- Viperidae

**S39: Species information**

Lizards  
Geckos, Gekkonidae

***Tropicolotes sp.*  
Undescribed**

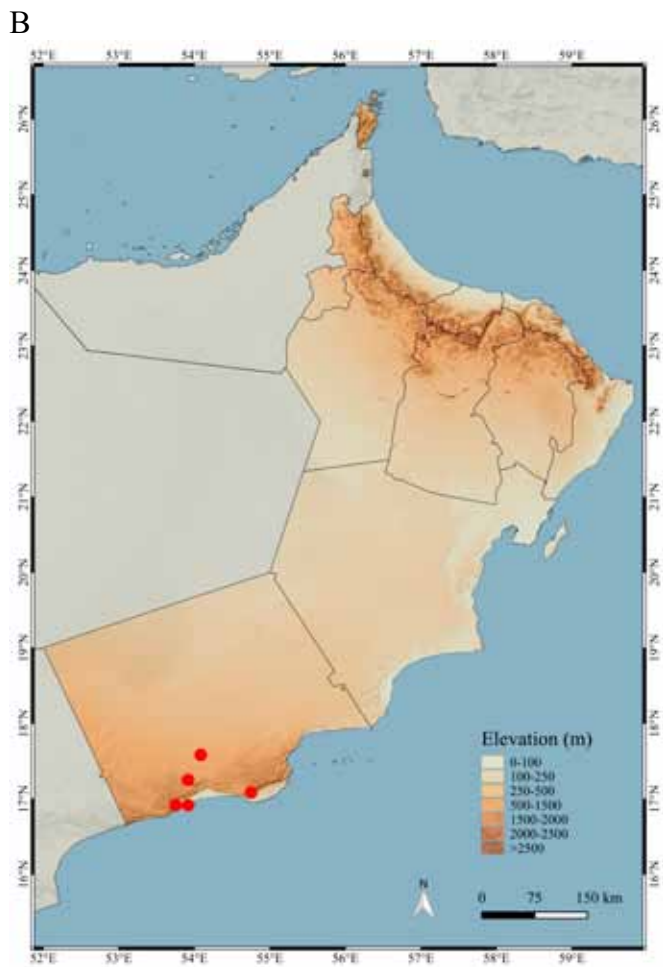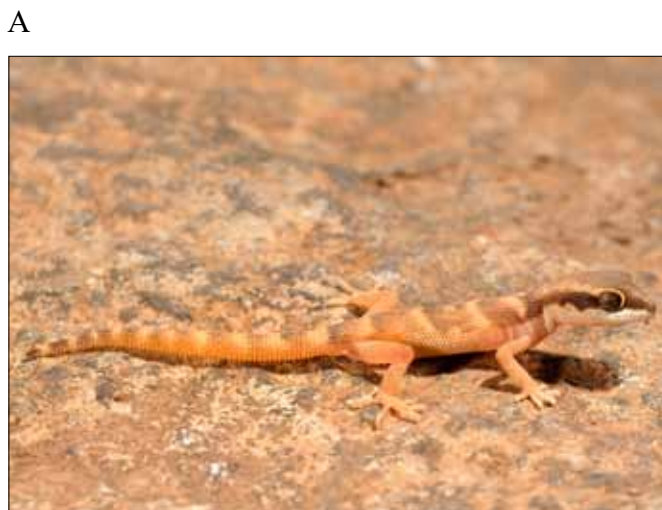

**C**

Useful information

|                             |     |
|-----------------------------|-----|
| IUCN Category               | NE  |
| Endemic                     | YES |
| Venomous                    | NO  |
| Insular                     | NO  |
| Present in a protected area | NO  |

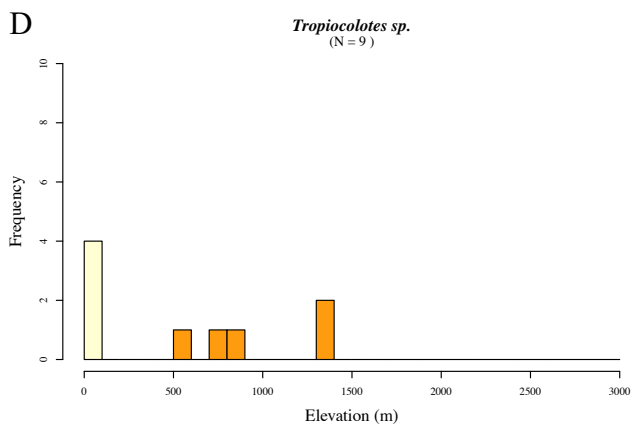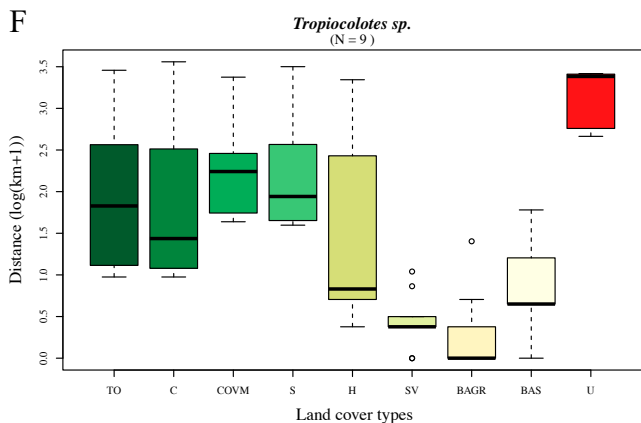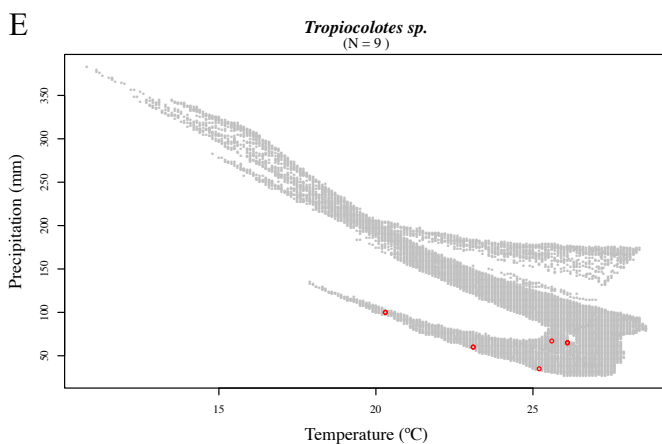

- Lizards
- Agamids
- Geckos**
- Lacertids
- Skinks
- Amphisbaenids
- Varamids
- Snakes
- Boidae
- Colubridae
- Elapidae
- Lamprophiidae
- Leptotyphlopidae
- Typhlopidae
- Viperidae

***Asaccus gallagheri***  
(Arnold, 1972)

**S40: Species information**

Lizards

Geckos, Phyllodactylidae

A

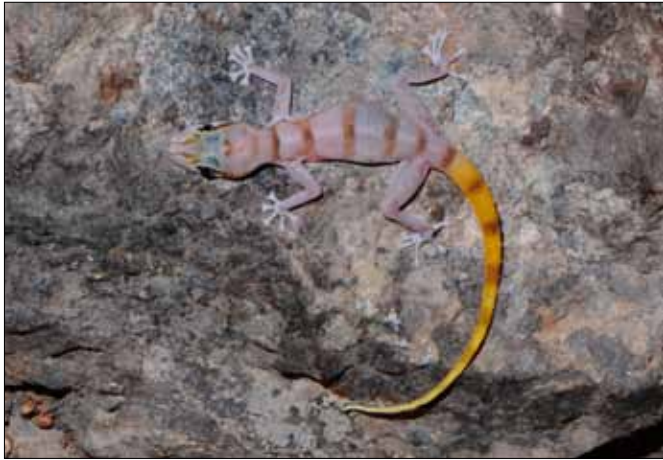

B

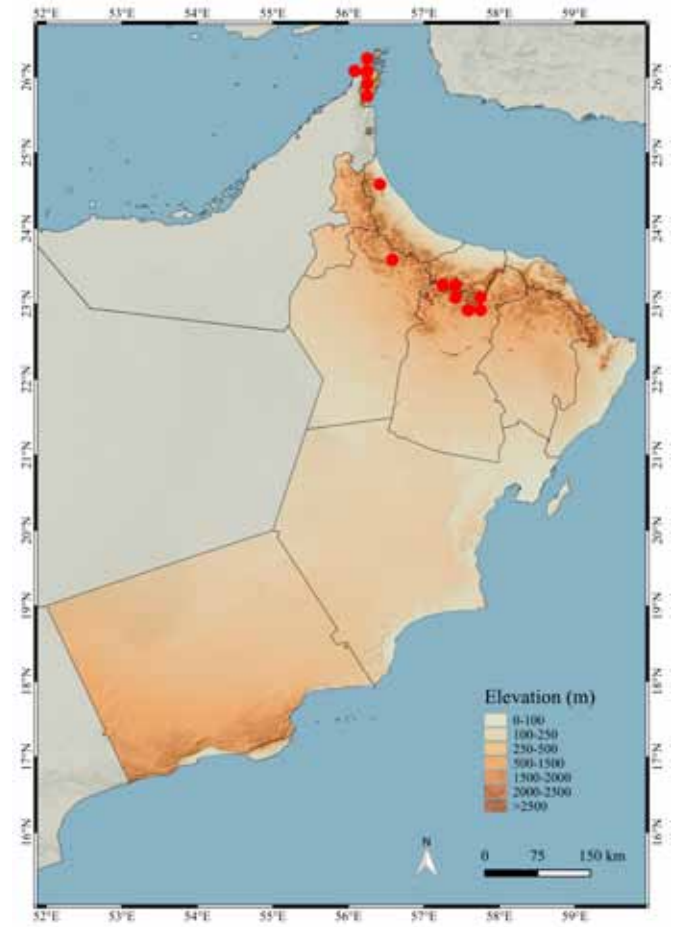

C

Useful information

|                             |    |
|-----------------------------|----|
| IUCN Category               | NE |
| Endemic                     | NO |
| Venomous                    | NO |
| Insular                     | NO |
| Present in a protected area | NO |

D

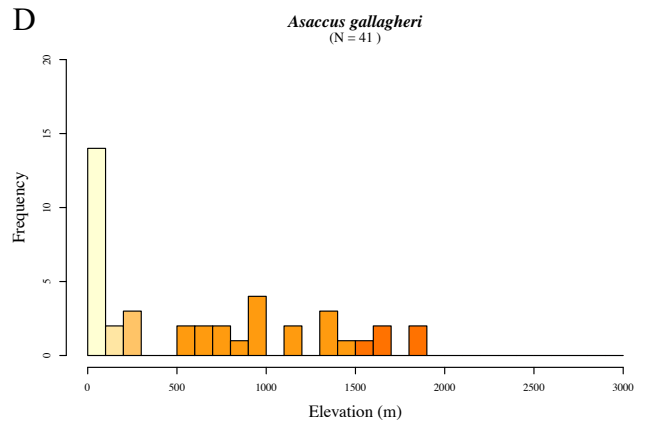

E

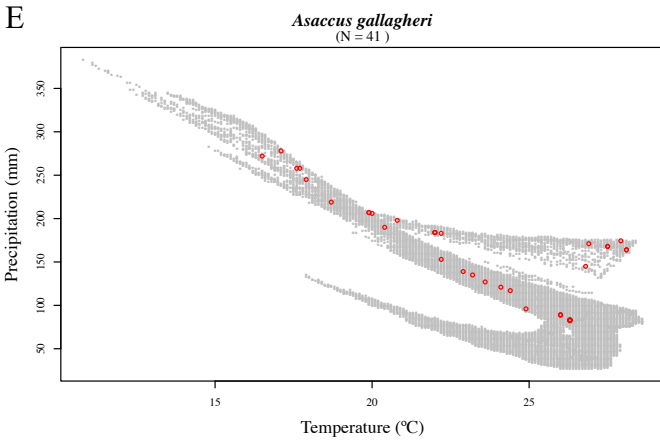

F

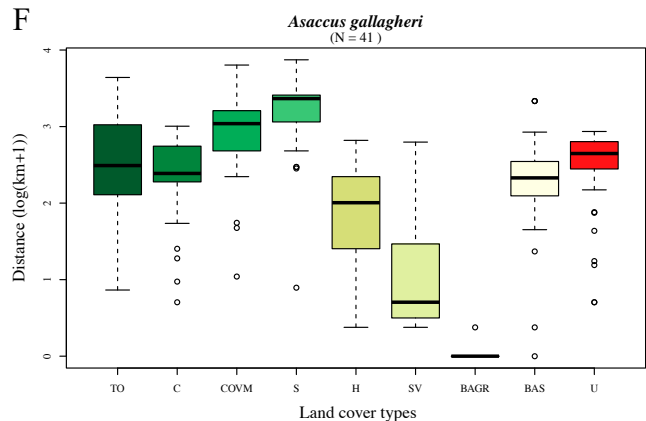

- Lizards
- Agamids
- Geckos
- Lacertids
- Skinks
- Amphisbaenids
- Varanids
- Snakes
- Boidae
- Colubridae
- Elapidae
- Lamprophiidae
- Leptotyphlopidae
- Typhlopidae
- Viperidae



**S41: Species information**

Lizards

Geckos, Phyllodactylidae

*Asaccus gardneri*  
Carranza, Simó-Riudalbas, Jayasinghe, Wilms  
& Els, 2016

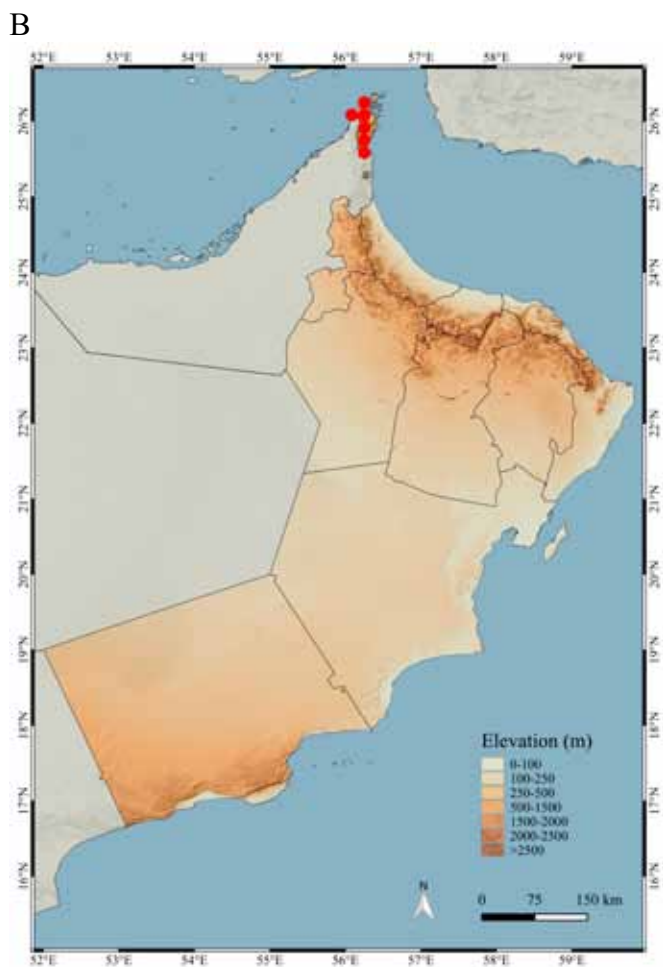

**A**

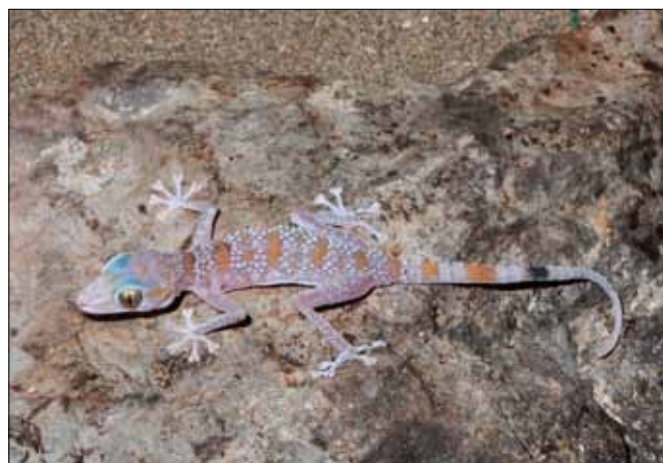

**C**

Useful information

|                             |    |
|-----------------------------|----|
| IUCN Category               | NE |
| Endemic                     | NO |
| Venomous                    | NO |
| Insular                     | NO |
| Present in a protected area | NO |

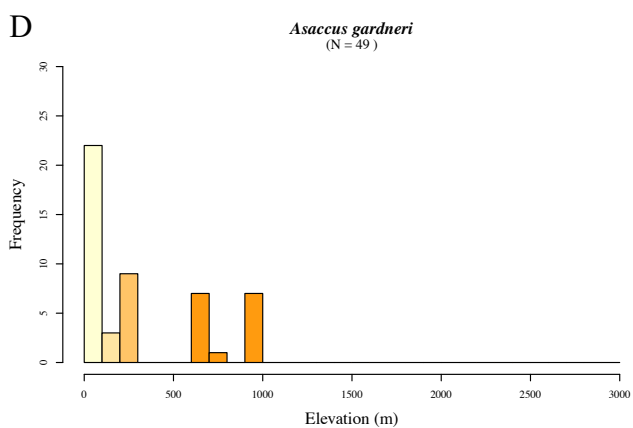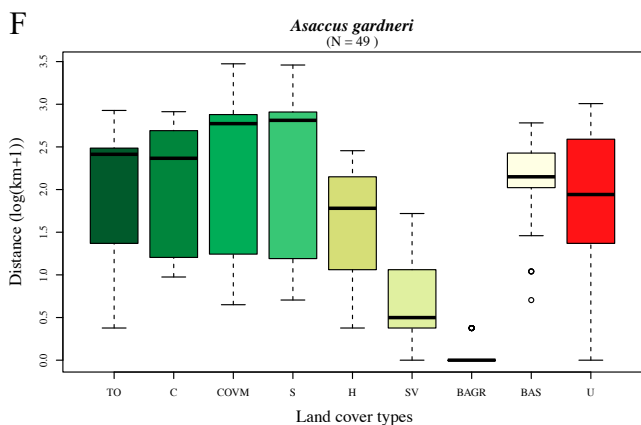

**E**

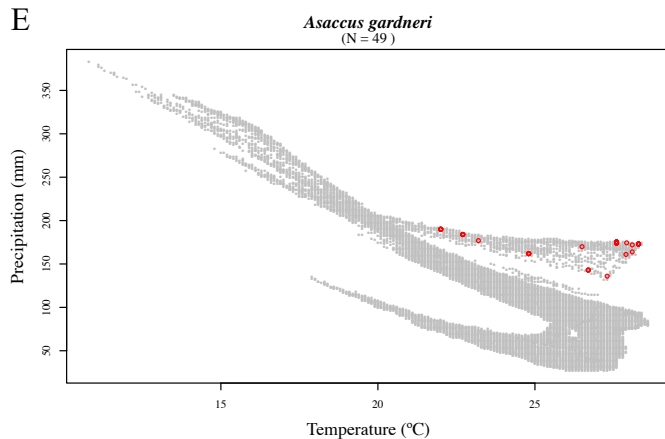

Lizards

Agamids

Geckos

Lacertids

Skinks

Amphisbaenids

Varamids

Snakes

Boidae

Colubridae

Elapidae

Lamprophiidae

Leptotyphlopidae

Typhlopidae

Viperidae

***Asaccus margaritae***  
 Carranza, Simó-Riudalbas, Jayasinghe, Wilms  
 & Els, 2016

**S42: Species information**

Lizards  
 Geckos, Phyllodactylidae

A

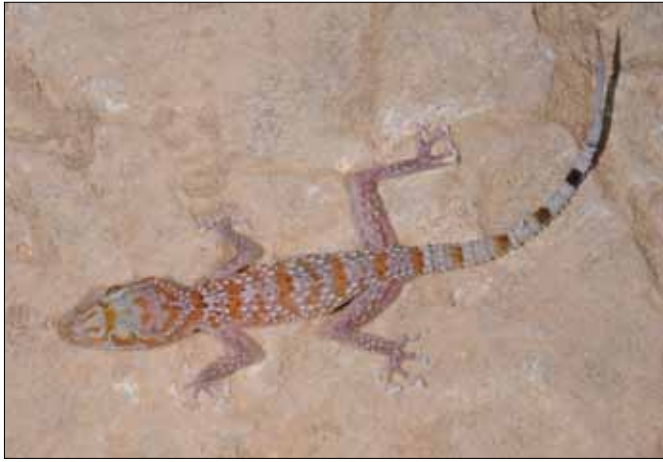

B

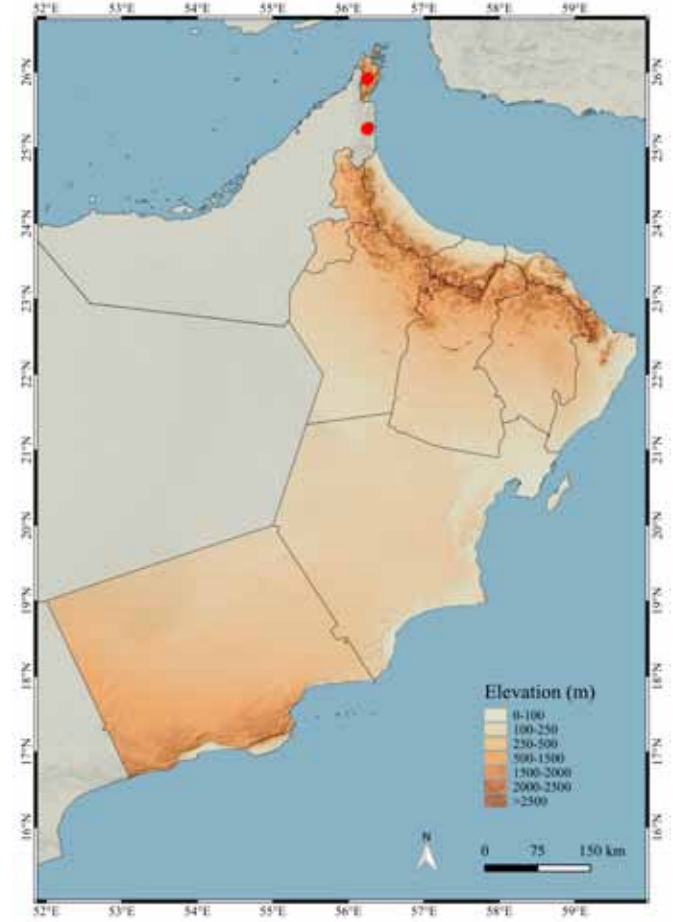

C

Useful information

|                             |    |
|-----------------------------|----|
| IUCN Category               | NE |
| Endemic                     | NO |
| Venomous                    | NO |
| Insular                     | NO |
| Present in a protected area | NO |

D

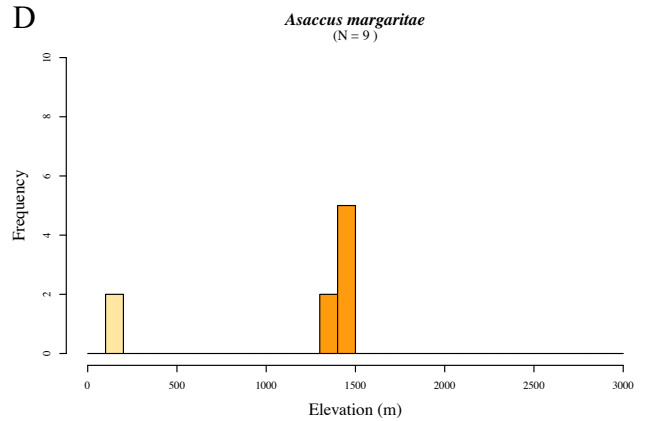

E

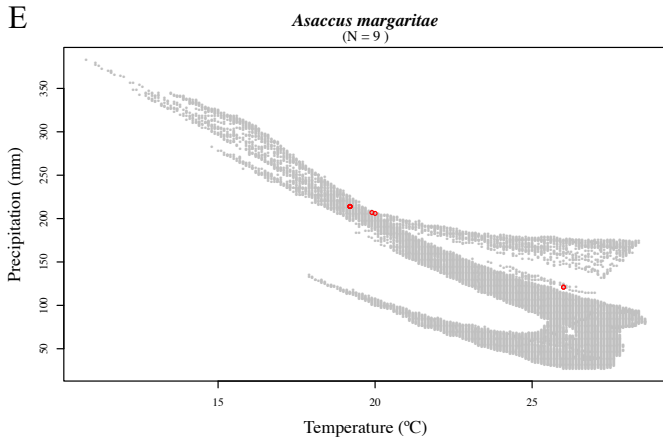

F

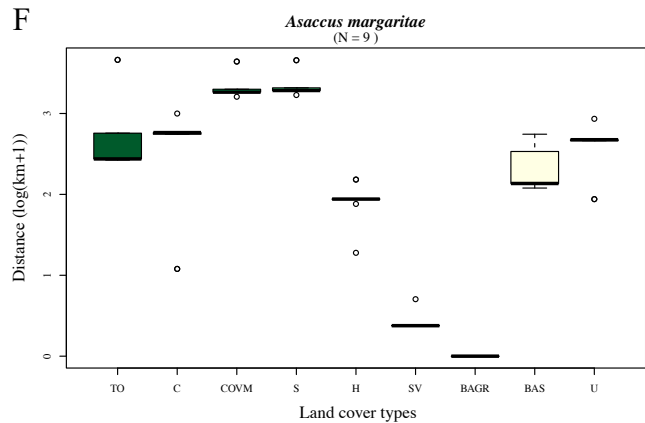

- Lizards
- Agamids
- Geckos
- Lacertids
- Skinks
- Amphisbaenids
- Varanids
- Snakes
- Boidae
- Colubridae
- Elapidae
- Lamprophiidae
- Leptotyphlopidae
- Typhlopidae
- Viperidae

**S43: Species information**

Lizards

Geckos, Phyllodactylidae

*Asaccus montanus*  
Gardner, 1994

**B**

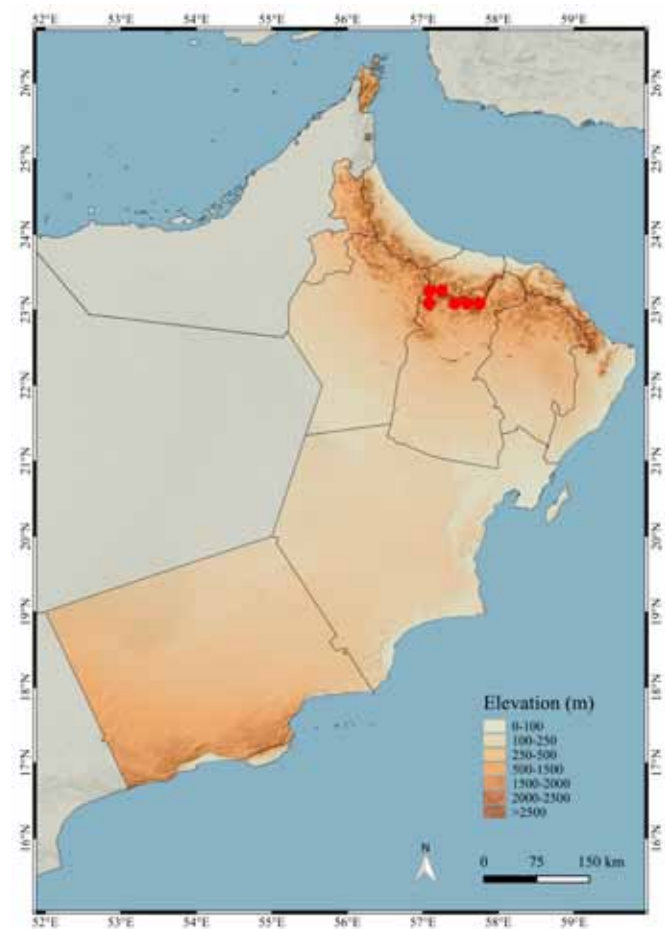

**A**

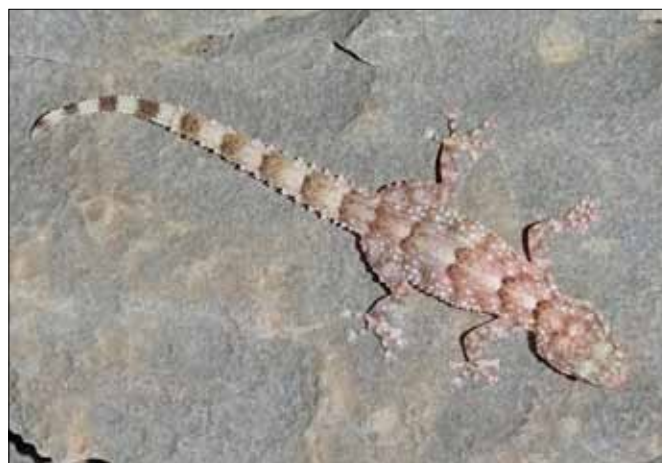

**C**

Useful information

|                             |     |
|-----------------------------|-----|
| IUCN Category               | VU  |
| Endemic                     | YES |
| Venomous                    | NO  |
| Insular                     | NO  |
| Present in a protected area | NO  |

**D**

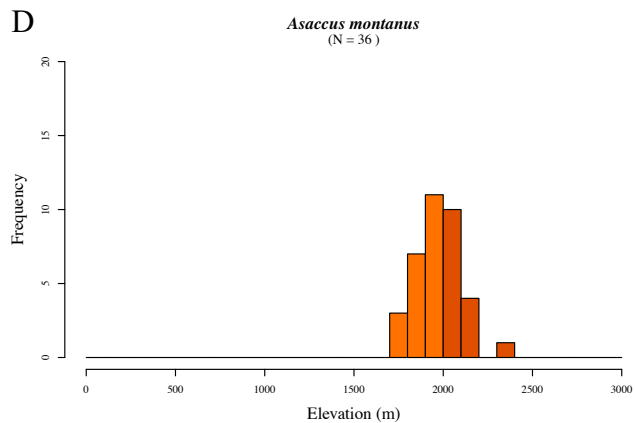

**F**

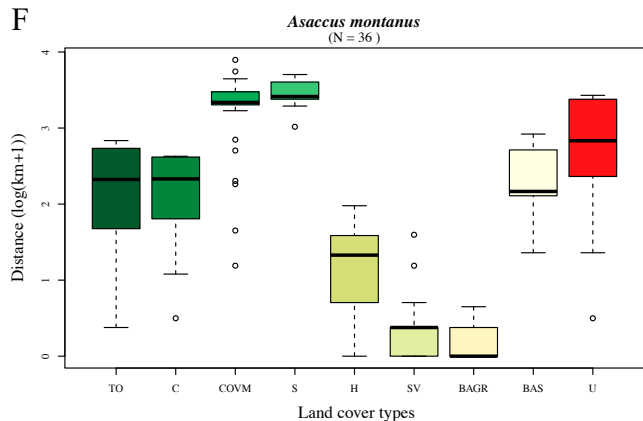

**E**

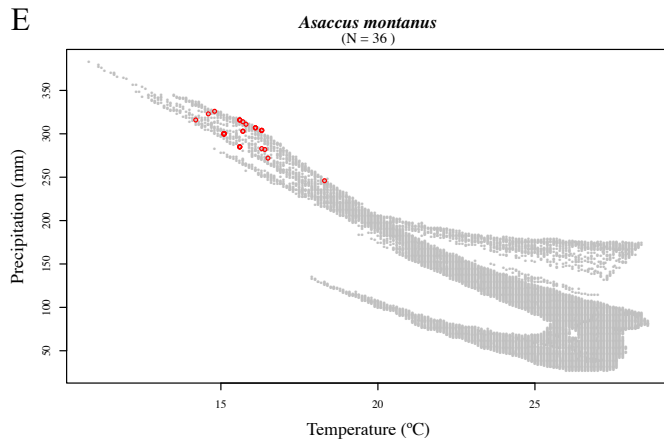

Lizards

Agamids

Geckos

Lacertids

Skinks

Amphisbaenids

Varamids

Snakes

Boidae

Colubridae

Elapidae

Lamprophiidae

Leptotyphlopidae

Typhlopidae

Viperidae

***Asaccus platyrhynchus***  
**Arnold & Gardner, 1994**

**S44: Species information**

Lizards

Geckos, Phyllodactylidae

A

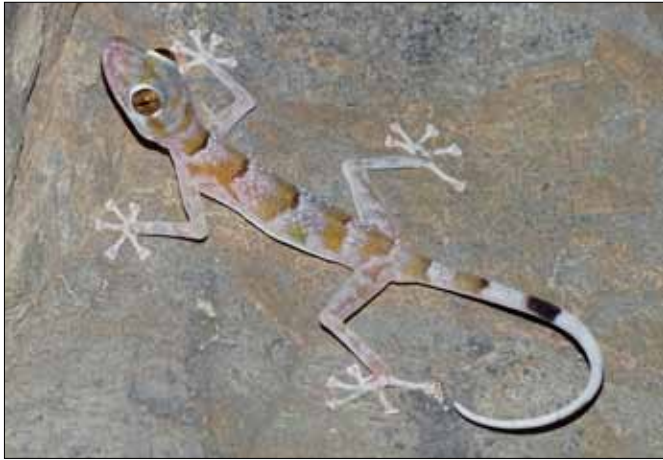

B

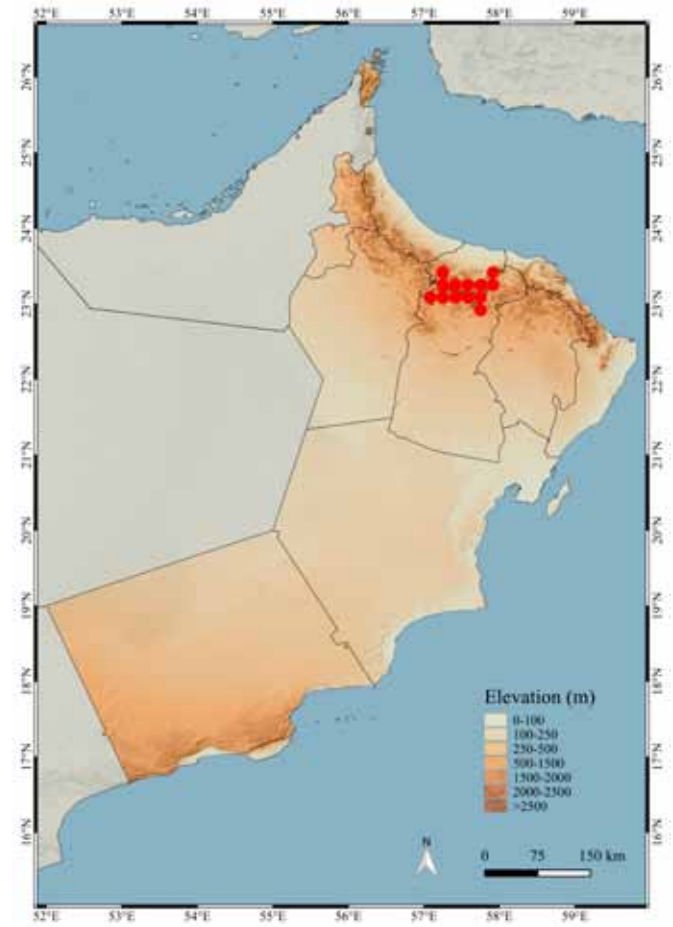

C

Useful information

|                             |     |
|-----------------------------|-----|
| IUCN Category               | LC  |
| Endemic                     | YES |
| Venomous                    | NO  |
| Insular                     | NO  |
| Present in a protected area | NO  |

D

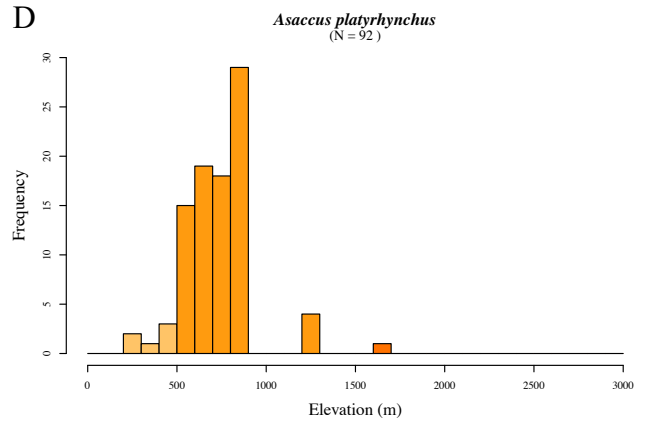

E

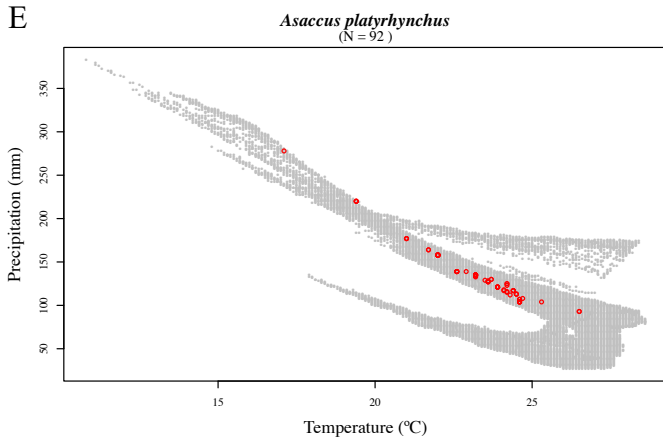

F

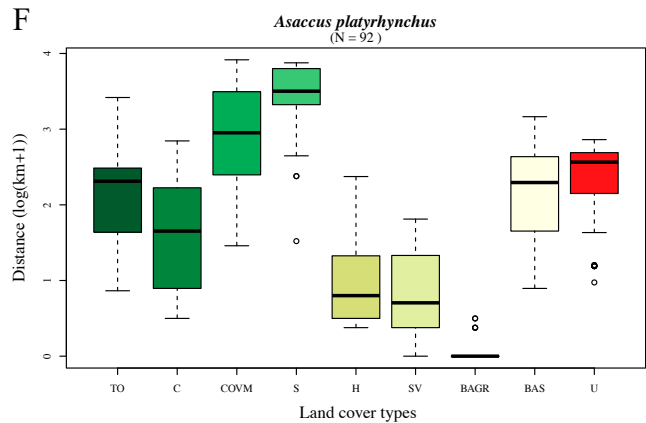

- Lizards
- Agamids
- Geckos
- Lacertids
- Skinks
- Amphisbaenids
- Varanids
- Snakes
- Boidae
- Colubridae
- Elapidae
- Lamprophiidae
- Leptotyphlopidae
- Typhlopidae
- Viperidae

**S45: Species information**

Lizards

Geckos, Phyllodactylidae

*Asaccus arnoldi*  
 Simó-Riudalbas, Tarroso, Papenfuss, Al-Sariri  
 & Carranza, 2017

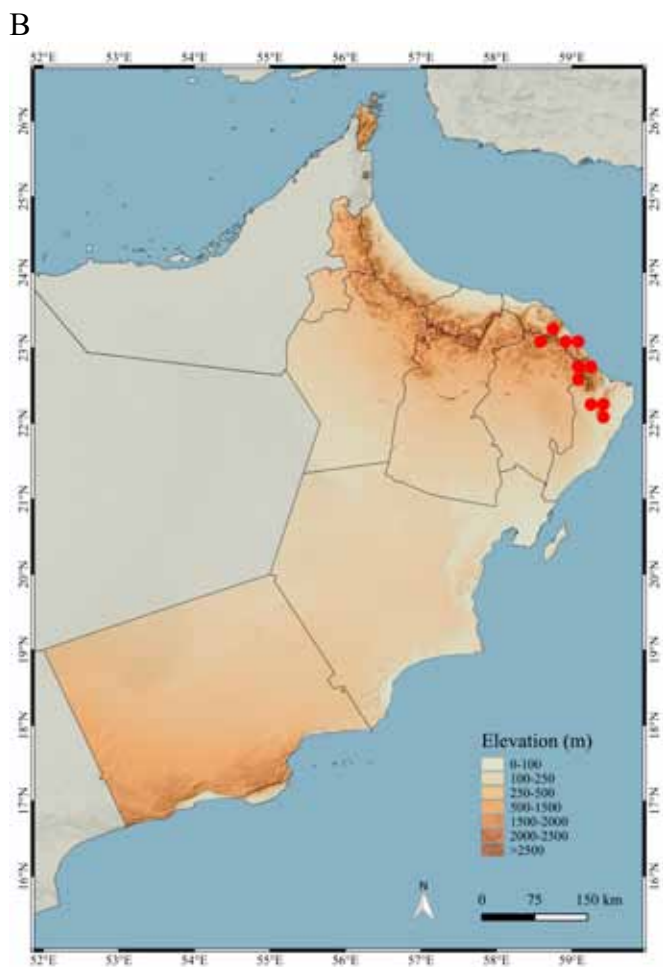

**A**

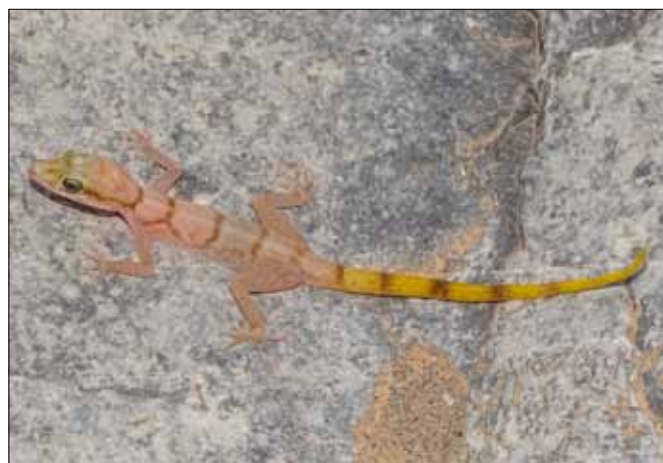

**C**

Useful information

|                             |     |
|-----------------------------|-----|
| IUCN Category               | NE  |
| Endemic                     | YES |
| Venomous                    | NO  |
| Insular                     | NO  |
| Present in a protected area | YES |

**D** *Asaccus arnoldi*  
(N = 18)

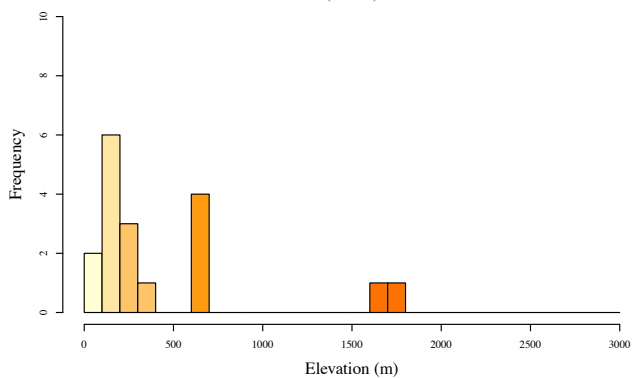

**F** *Asaccus arnoldi*  
(N = 18)

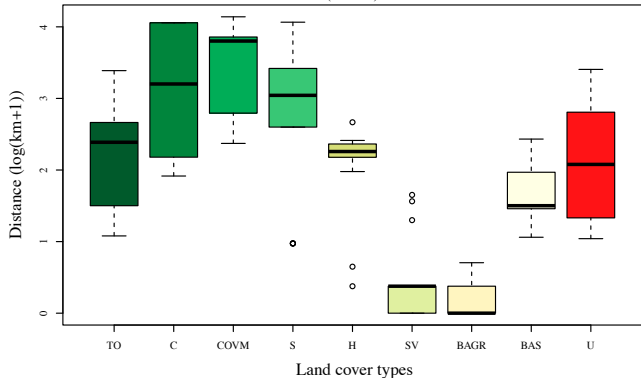

**E**

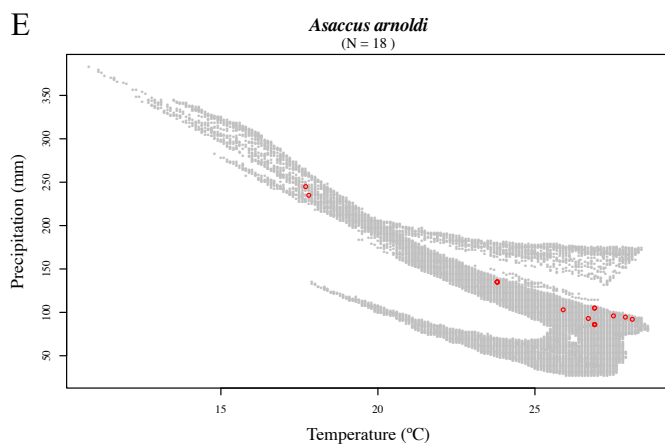

Lizards

Agamids

Geckos

Lacertids

Skinks

Amphisbaenids

Varamids

Snakes

Boidae

Colubridae

Elapidae

Lamprophiidae

Leptotyphlopidae

Typhlopidae

Viperidae

***Ptyodactylus dhofarensis***  
 Nazarov, Melnikov & Melnikova, 2013

**S46: Species information**

Lizards

Geckos, Phyllodactylidae

A

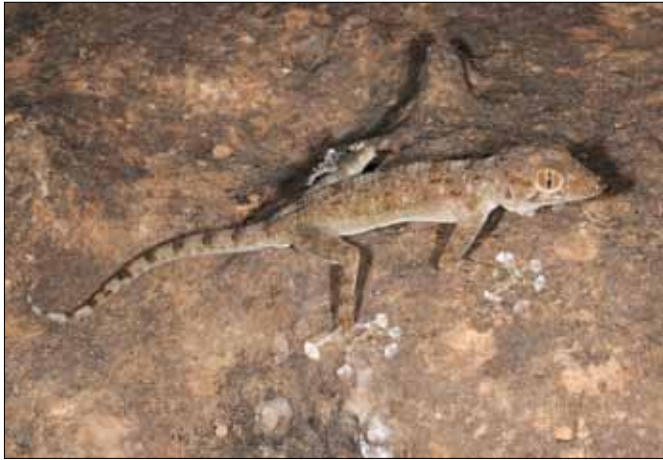

B

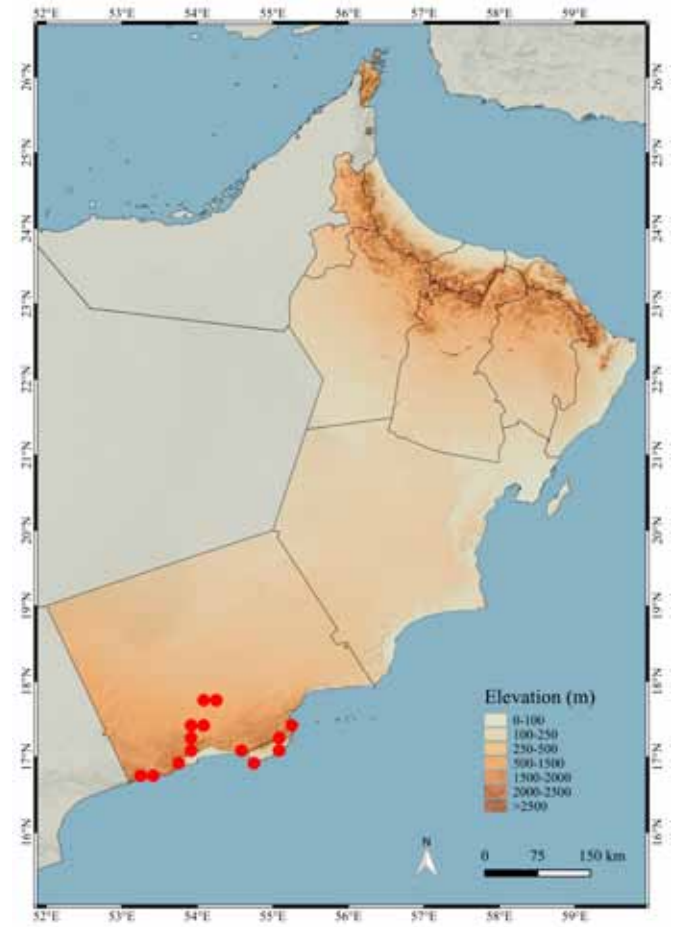

C

Useful information

|                             |     |
|-----------------------------|-----|
| IUCN Category               | NE  |
| Endemic                     | NO  |
| Venomous                    | NO  |
| Insular                     | NO  |
| Present in a protected area | YES |

D

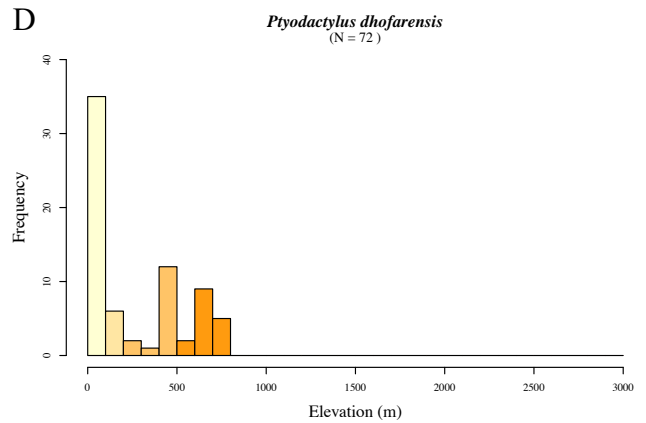

E

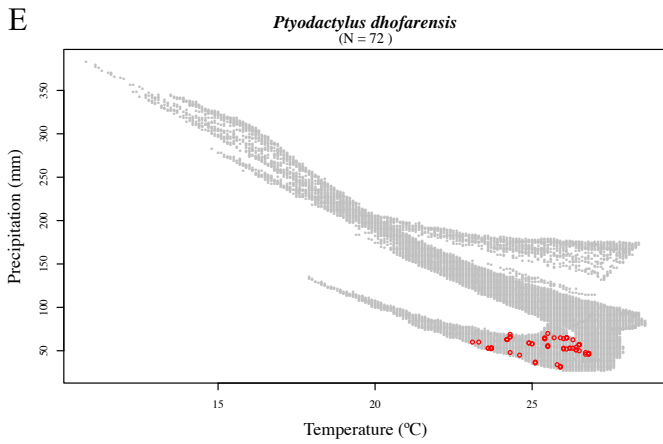

F

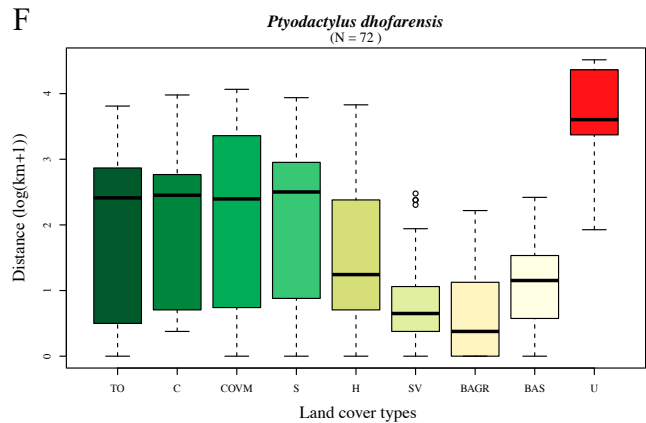

**S47: Species information**

Lizards

Geckos, Phyllodactylidae

*Ptyodactylus orlovi*  
Nazarov, Melnikov & Melnikova, 2013

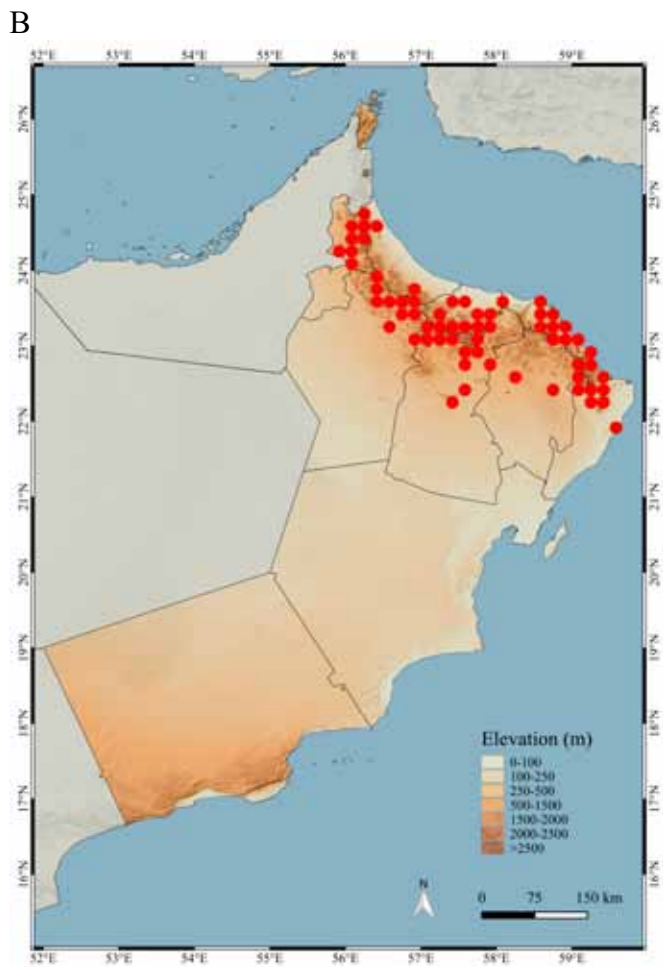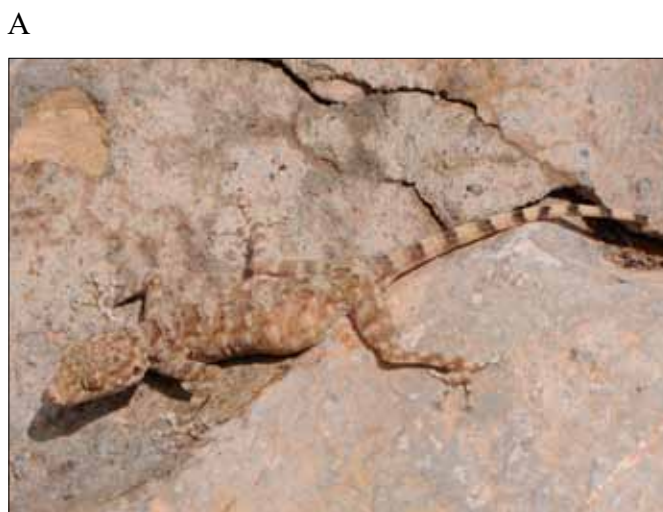

**C**

| Useful information          |     |
|-----------------------------|-----|
| IUCN Category               | NE  |
| Endemic                     | NO  |
| Venomous                    | NO  |
| Insular                     | NO  |
| Present in a protected area | YES |

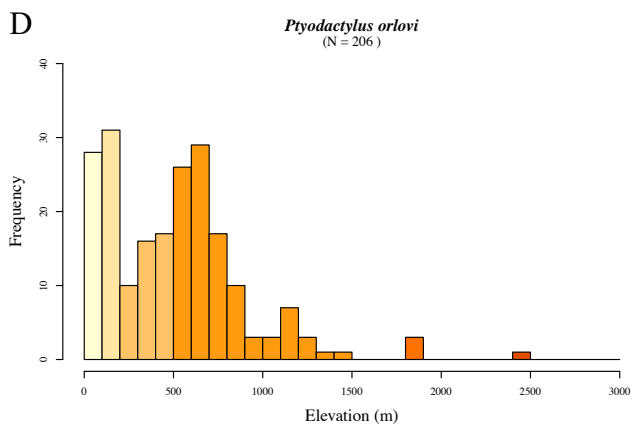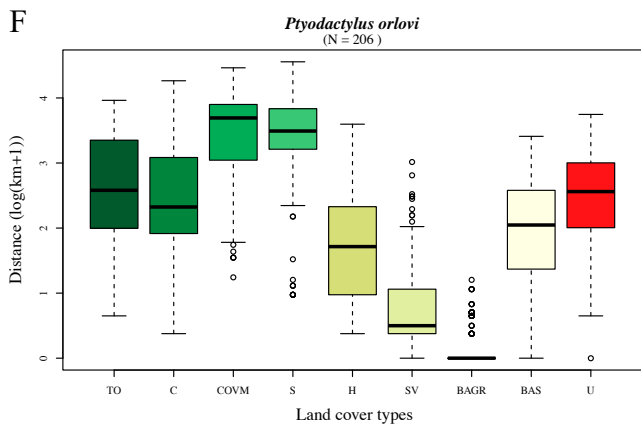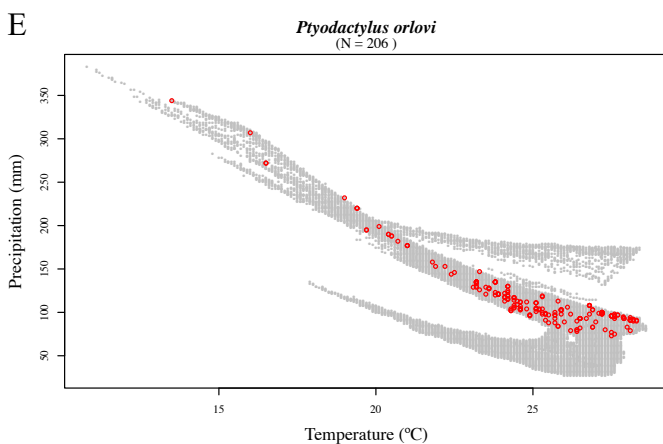

- Lizards
- Agamids
- Geckos**
- Lacertids
- Skinks
- Amphisbaenids
- Varamids
- Snakes
- Boidae
- Colubridae
- Elapidae
- Lamprophiidae
- Leptotyphlopidae
- Typhlopidae
- Viperidae

***Ptyodactylus ruusaljibalicus***  
Undescribed

**S48: Species information**

Lizards  
Geckos, Phyllodactylidae

A

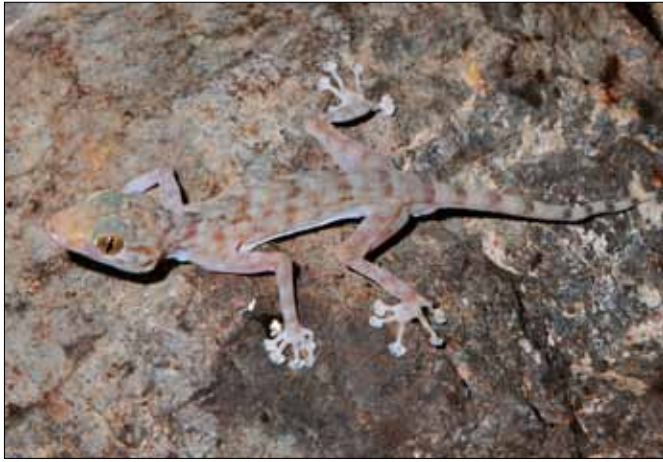

B

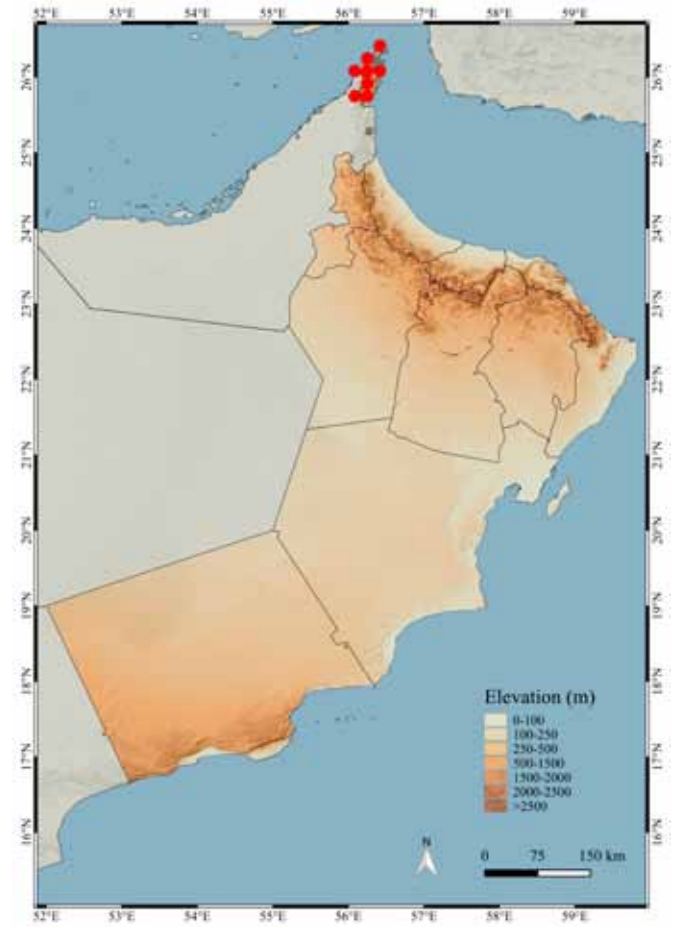

C

Useful information

|                             |     |
|-----------------------------|-----|
| IUCN Category               | NE  |
| Endemic                     | NO  |
| Venomous                    | NO  |
| Insular                     | YES |
| Present in a protected area | NO  |

D

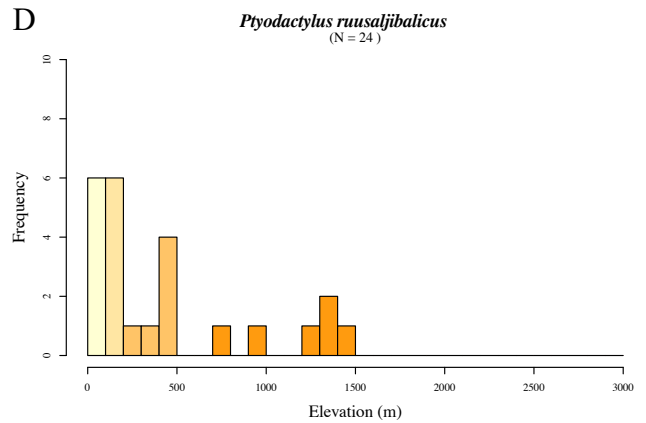

E

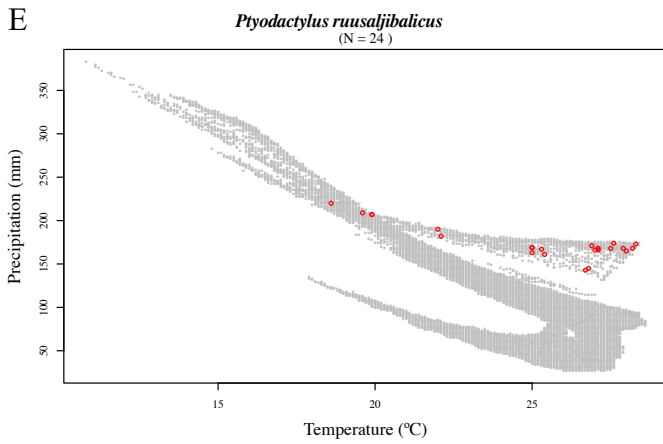

F

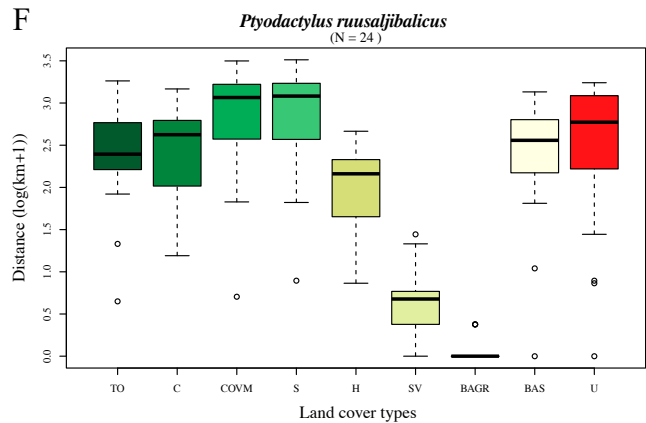



**S49: Species information**

Lizards

Geckos, Sphaerodactylidae

*Pristurus carteri*  
(Gray, 1863)

**B**

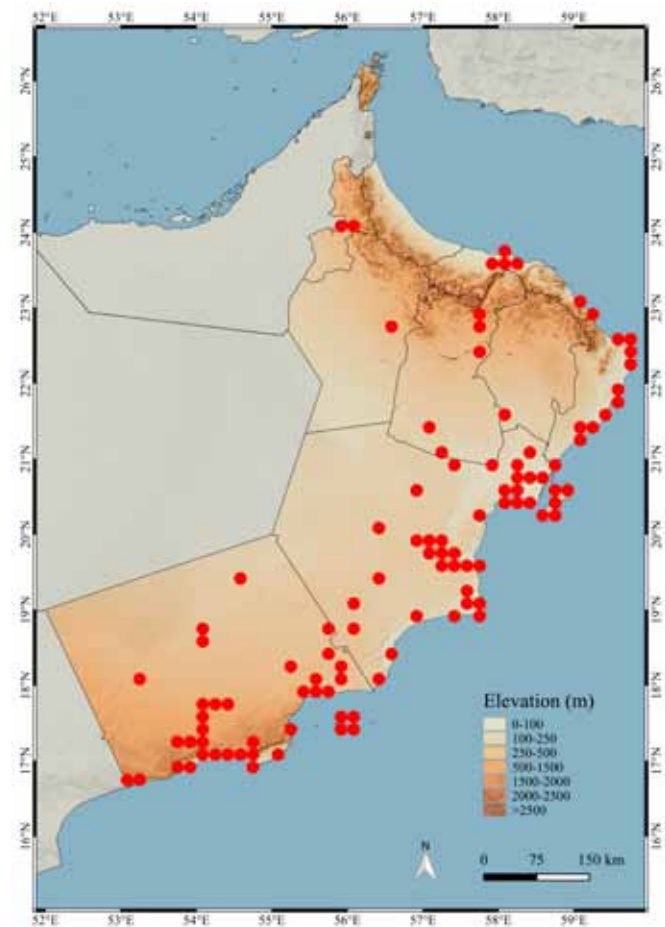

**A**

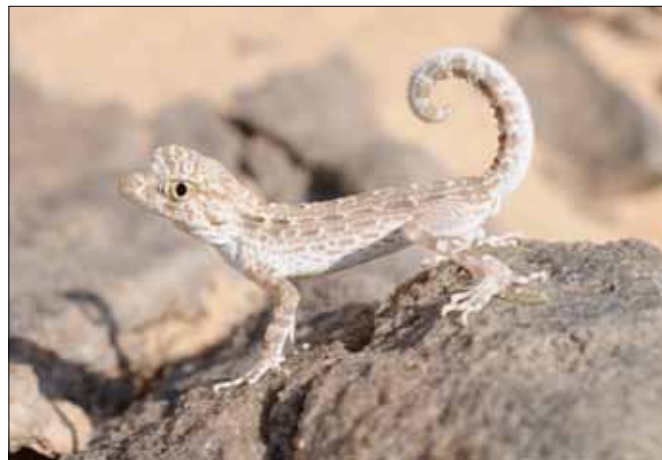

**C**

Useful information

|                             |     |
|-----------------------------|-----|
| IUCN Category               | LC  |
| Endemic                     | NO  |
| Venomous                    | NO  |
| Insular                     | YES |
| Present in a protected area | YES |

**D**

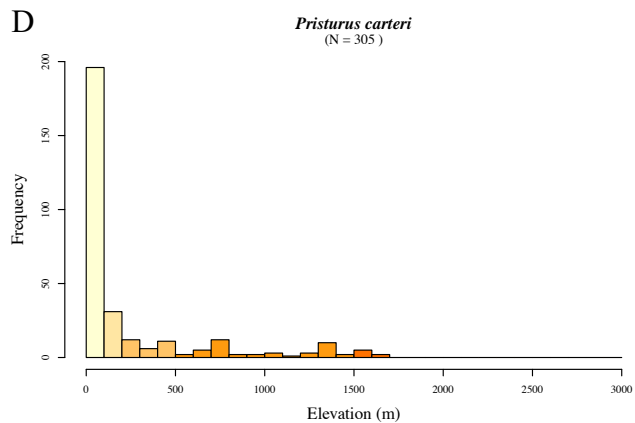

**F**

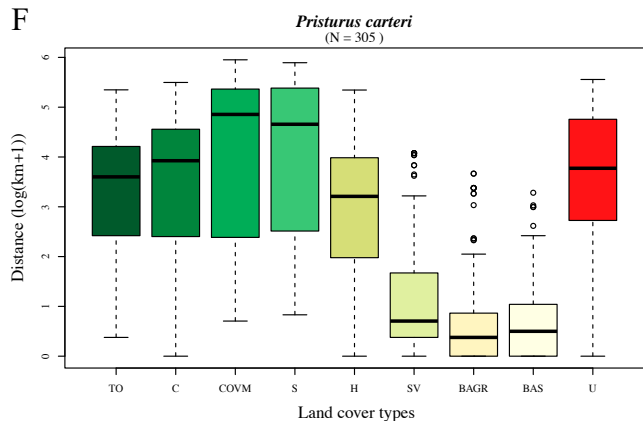

**E**

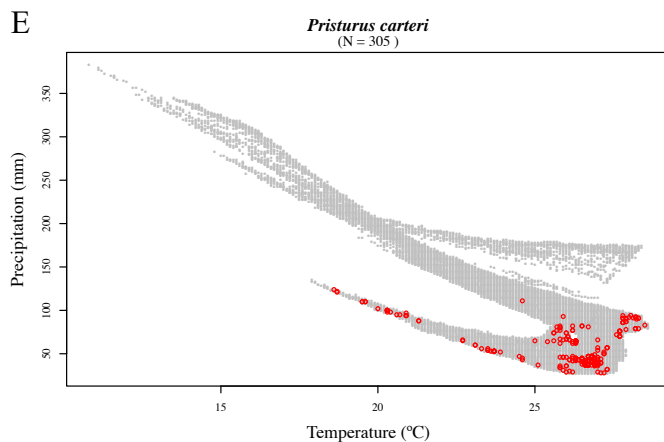

Lizards

Agamids

Geckos

Lacertids

Skinks

Amphisbaenids

Varamids

Snakes

Boidae

Colubridae

Elapidae

Lamprophiidae

Leptotyphlopidae

Typhlopidae

Viperidae

***Pristurus celerrimus***  
**Arnold, 1977**

**S50: Species information**  
 Lizards  
 Geckos, Sphaerodactylidae

A

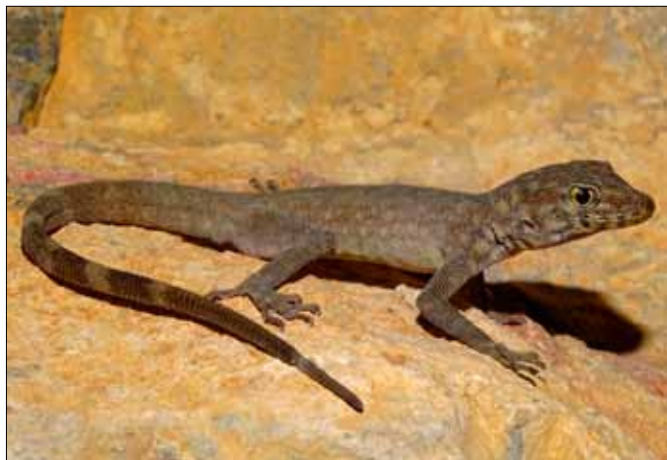

B

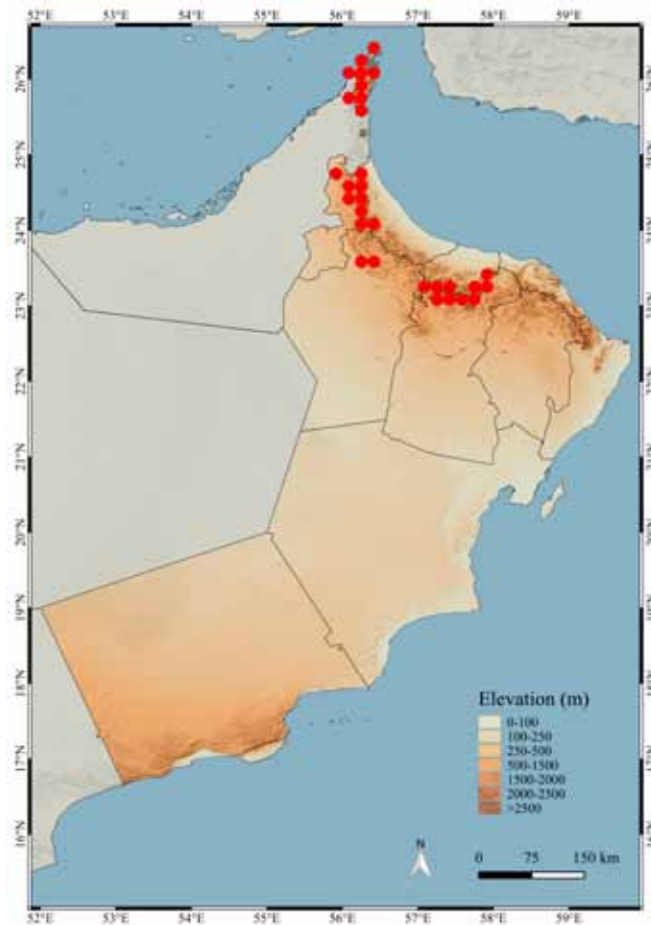

C

Useful information

|                             |     |
|-----------------------------|-----|
| IUCN Category               | LC  |
| Endemic                     | NO  |
| Venomous                    | NO  |
| Insular                     | YES |
| Present in a protected area | YES |

D

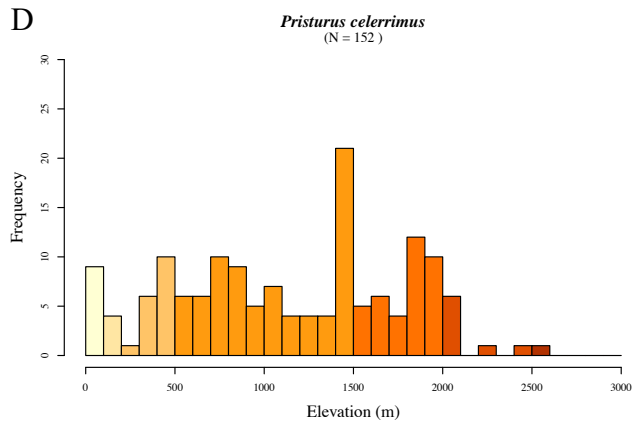

E

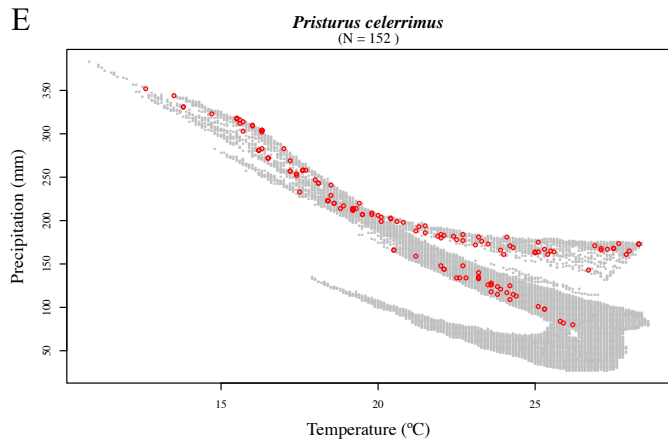

F

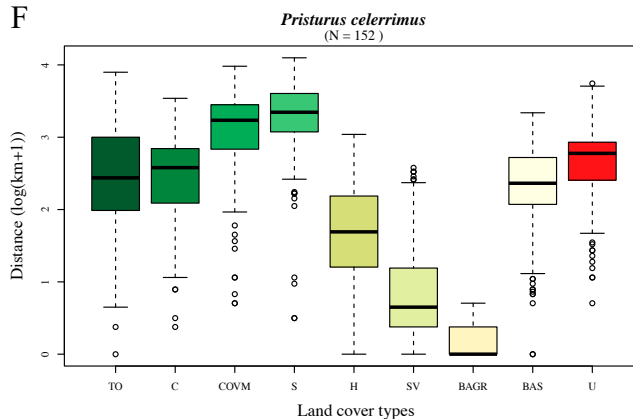

**S51: Species information**

Lizards

Geckos, Sphaerodactylidae

*Pristurus gallagheri*  
Arnold, 1986

**B**

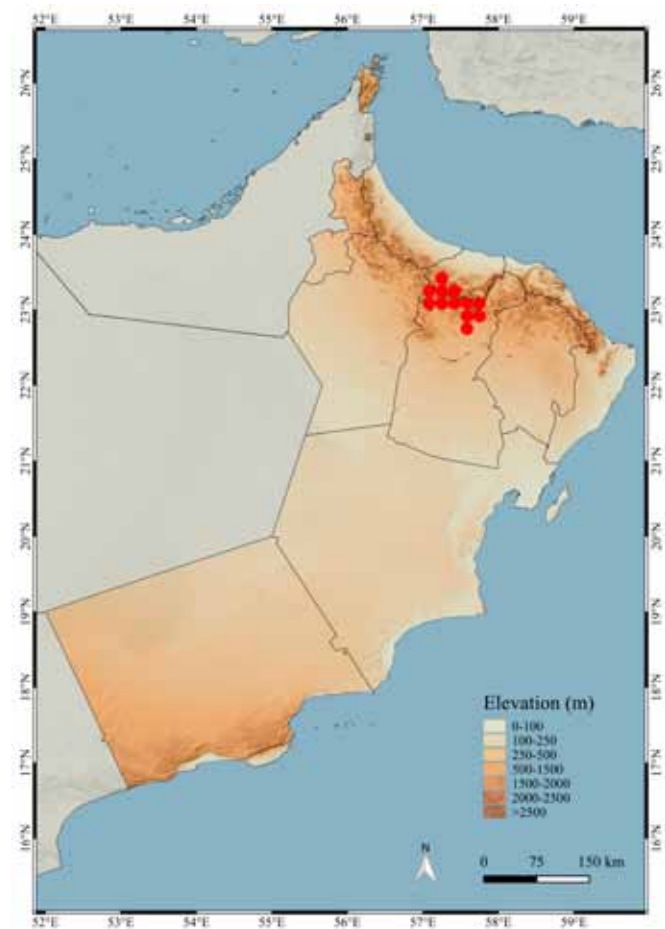

**A**

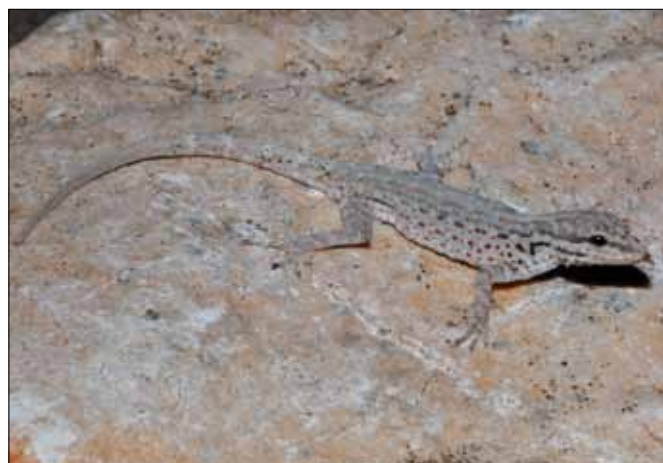

**C**

Useful information

|                             |     |
|-----------------------------|-----|
| IUCN Category               | NT  |
| Endemic                     | YES |
| Venomous                    | NO  |
| Insular                     | NO  |
| Present in a protected area | YES |

**D**

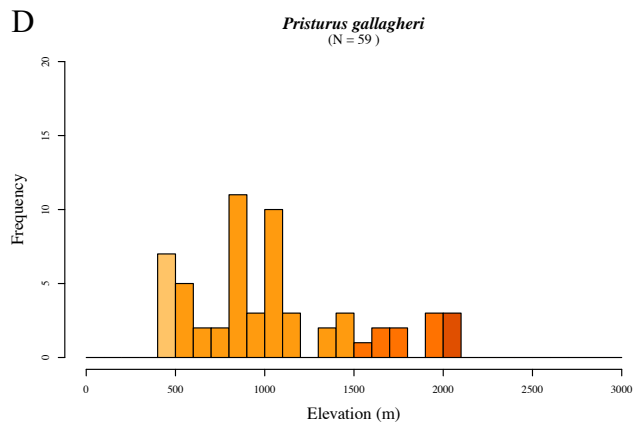

**F**

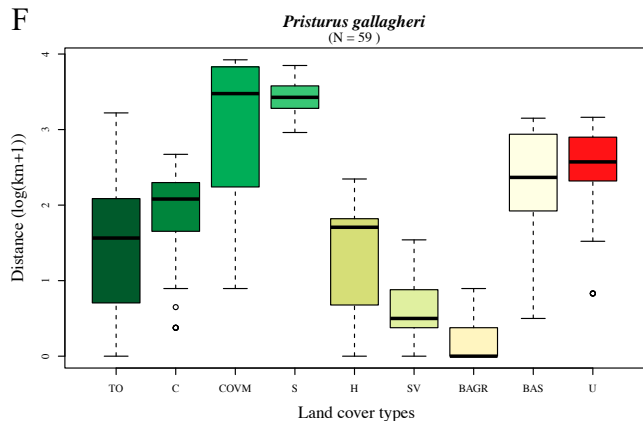

**E**

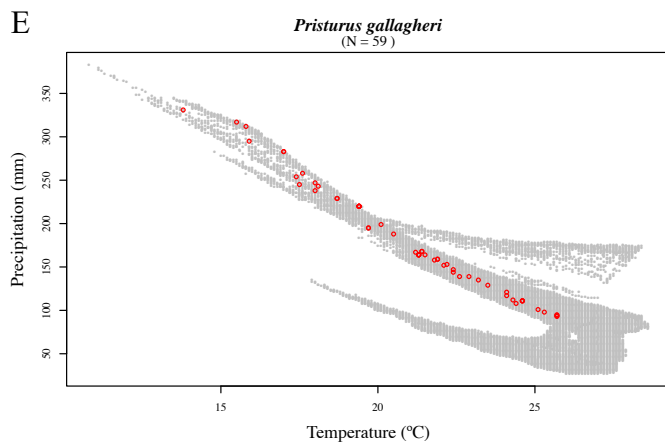

Lizards

Agamids

Geckos

Lacertids

Skinks

Amphisbaenids

Varamids

Snakes

Boidae

Colubridae

Elapidae

Lamprophiidae

Leptotyphlopidae

Typhlopidae

Viperidae

***Pristurus minimus***  
**Arnold, 1977**

**S52: Species information**

Lizards

Geckos, Sphaerodactylidae

A

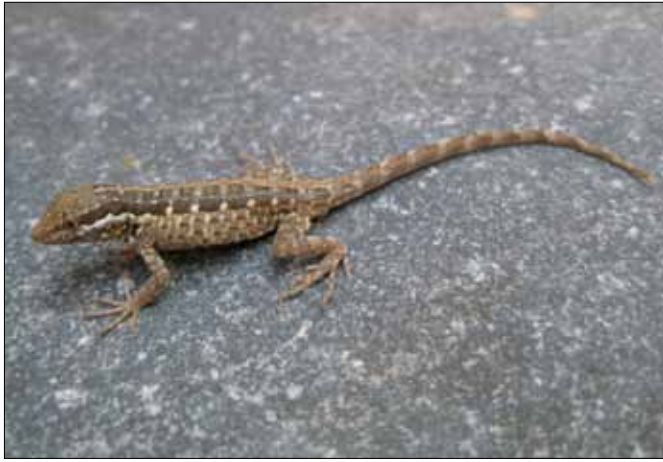

B

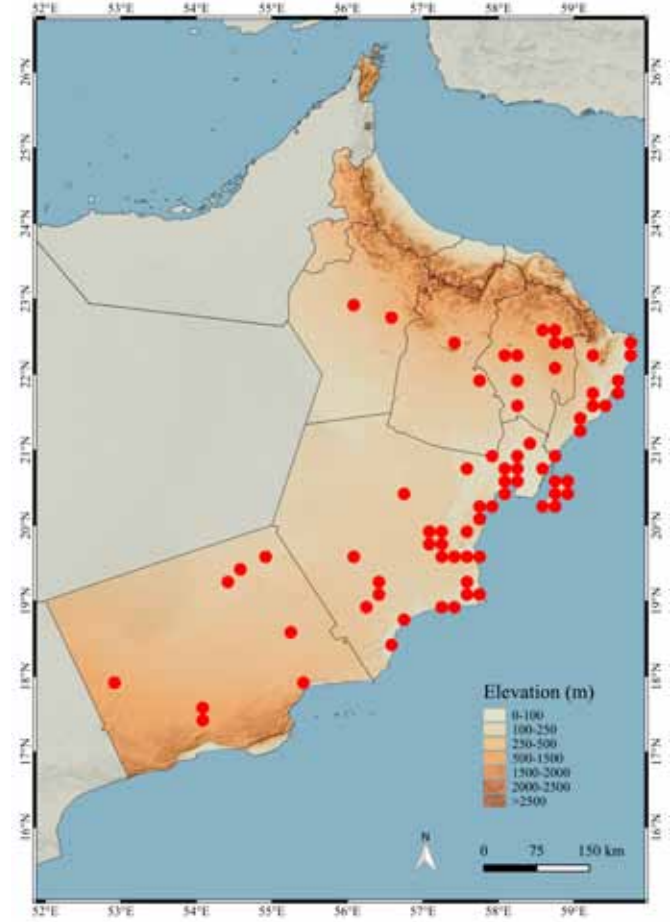

C

Useful information

|                             |     |
|-----------------------------|-----|
| IUCN Category               | LC  |
| Endemic                     | NO  |
| Venomous                    | NO  |
| Insular                     | YES |
| Present in a protected area | YES |

D

*Pristurus minimus*  
(N = 155)

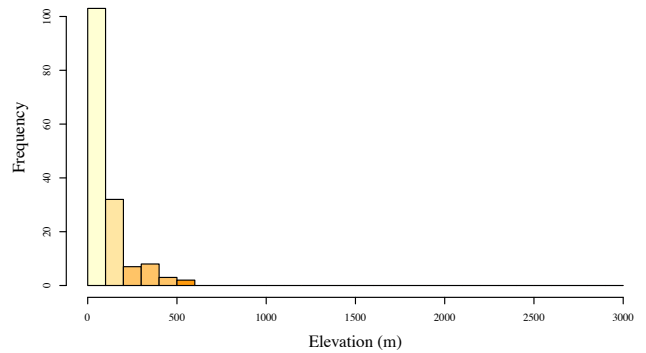

E

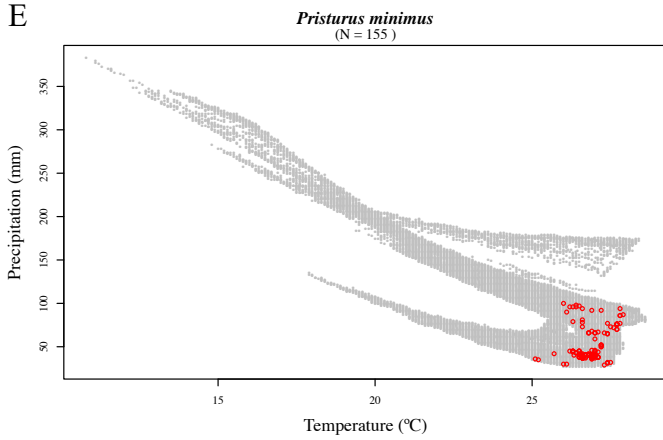

F

*Pristurus minimus*  
(N = 155)

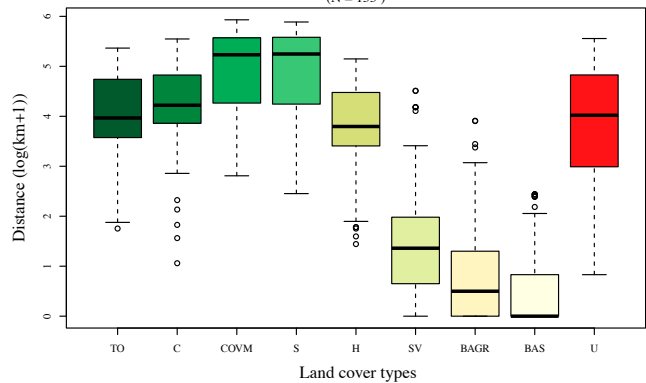

- Lizards
- Agamids
- Geckos
- Lacertids
- Skinks
- Amphisbaenids
- Varanids
- Snakes
- Boidae
- Colubridae
- Elapidae
- Lamprophiidae
- Leptotyphlopidae
- Typhlopidae
- Viperidae

**S53: Species information**

Lizards

Geckos, Sphaerodactylidae

*Pristurus rupestris rupestris*  
Blanford, 1874

**B**

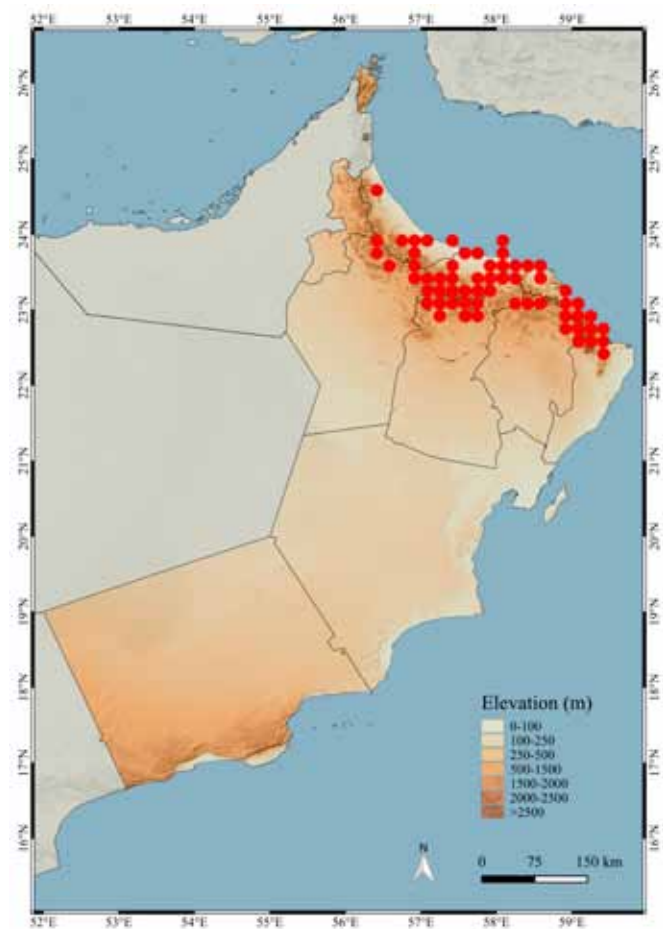

**A**

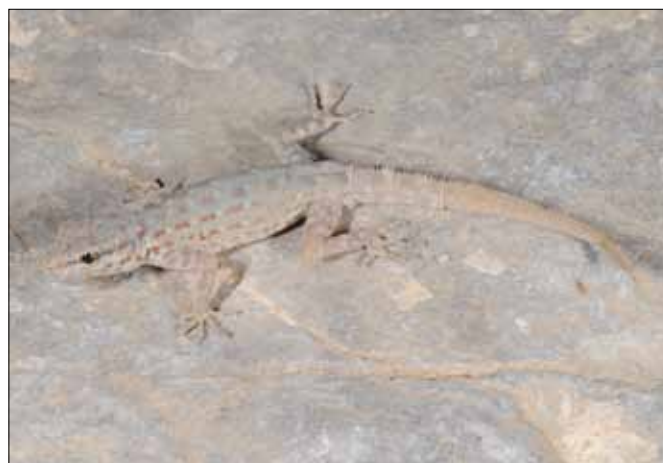

**C**

Useful information

|                             |     |
|-----------------------------|-----|
| IUCN Category               | NE  |
| Endemic                     | NO  |
| Venomous                    | NO  |
| Insular                     | YES |
| Present in a protected area | YES |

**D**

*Pristurus rupestris rupestris*  
(N = 297)

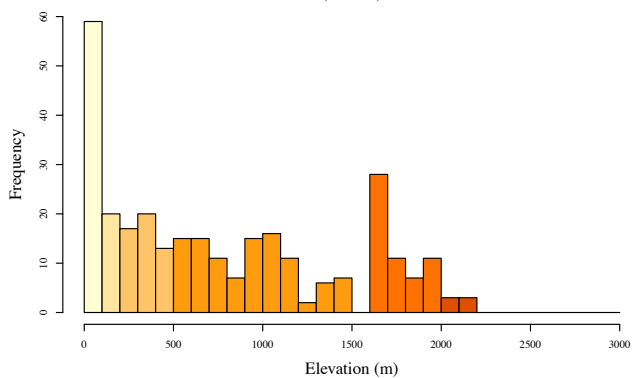

**F**

*Pristurus rupestris rupestris*  
(N = 297)

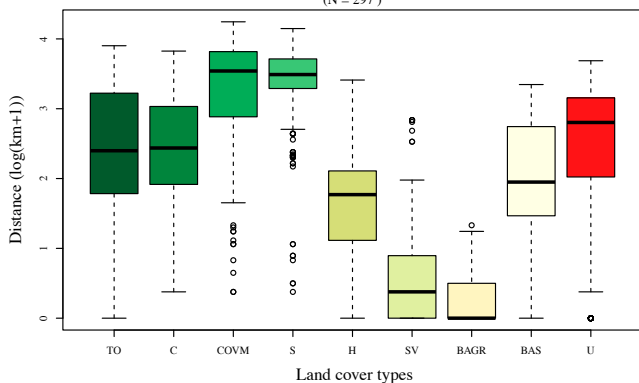

**E**

*Pristurus rupestris rupestris*  
(N = 297)

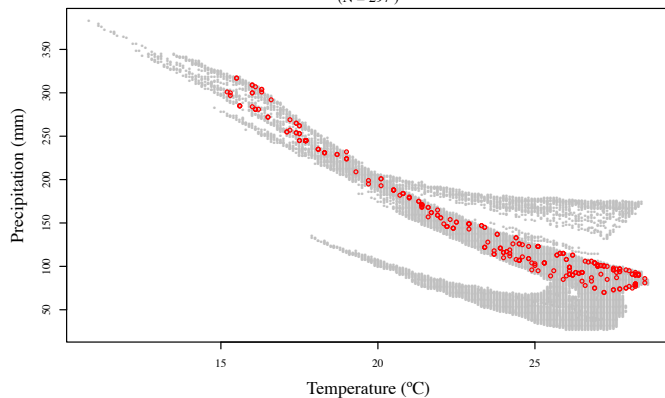

Lizards

Agamids

Geckos

Lacertids

Skinks

Amphisbaenids

Varamids

Snakes

Boidae

Colubridae

Elapidae

Lamprophiidae

Leptotyphlopidae

Typhlopidae

Viperidae

***Pristurus sp. 1***  
**Undescribed**

**S54: Species information**

Lizards

Geckos, Sphaerodactylidae

A

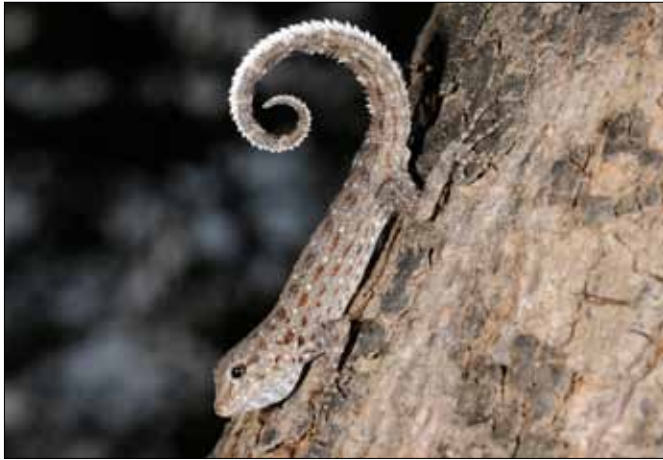

B

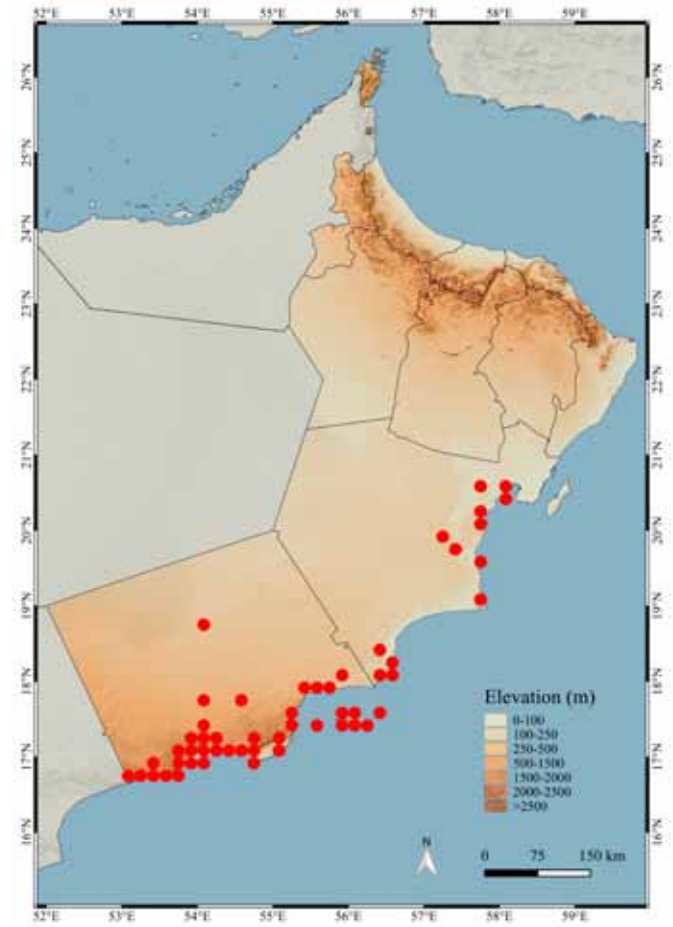

C

Useful information

|                             |     |
|-----------------------------|-----|
| IUCN Category               | NE  |
| Endemic                     | NO  |
| Venomous                    | NO  |
| Insular                     | YES |
| Present in a protected area | YES |

D

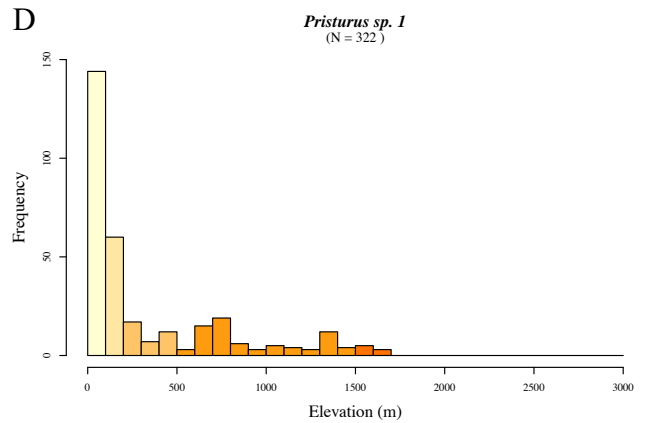

E

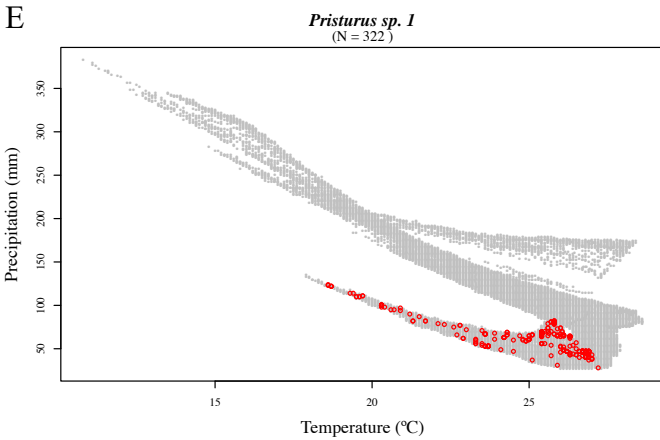

F

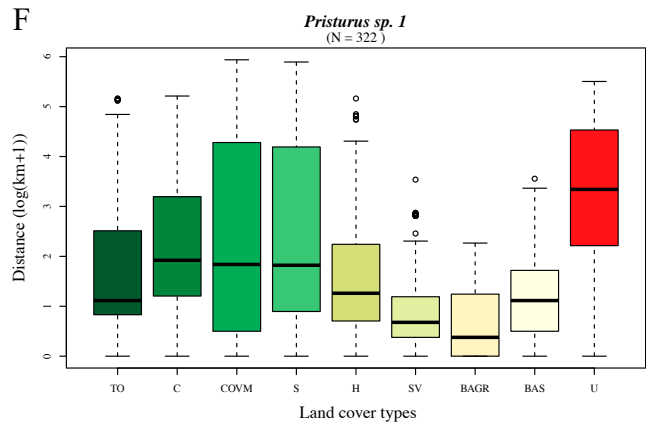

**S55: Species information**

Lizards

Geckos, Sphaerodactylidae

***Pristurus sp. 2***  
**Undescribed**

**B**

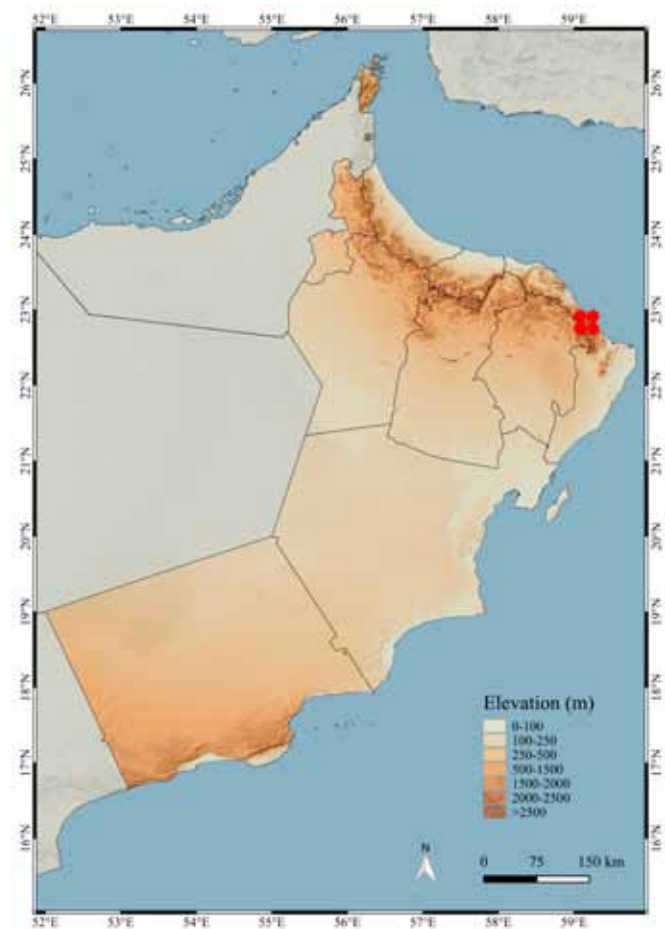

**A**

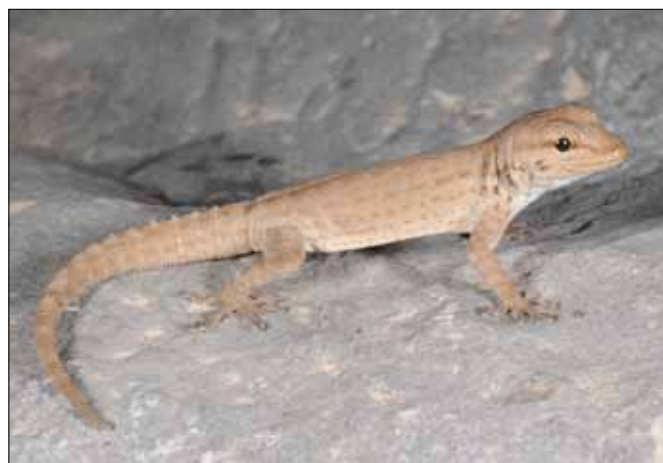

**C**

Useful information

|                             |     |
|-----------------------------|-----|
| IUCN Category               | NE  |
| Endemic                     | YES |
| Venomous                    | NO  |
| Insular                     | NO  |
| Present in a protected area | NO  |

**D**

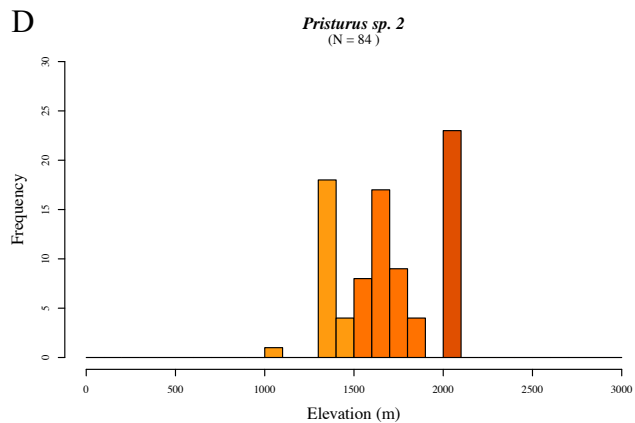

**F**

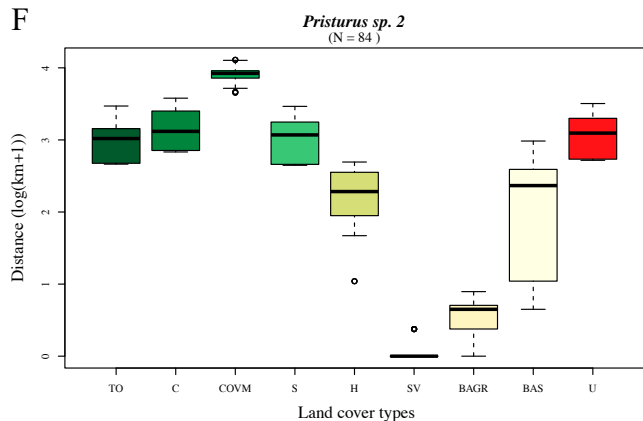

**E**

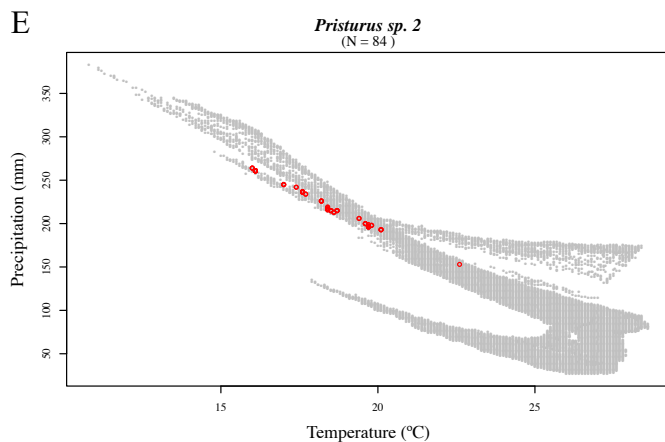

Lizards

Agamids

Geckos

Lacertids

Skinks

Amphisbaenids

Varamids

Snakes

Boidae

Colubridae

Elapidae

Lamprophiidae

Leptotyphlopidae

Typhlopidae

Viperidae

***Pristurus sp. 3***  
**Undescribed**

**S56: Species information**

Lizards

Geckos, Sphaerodactylidae

A

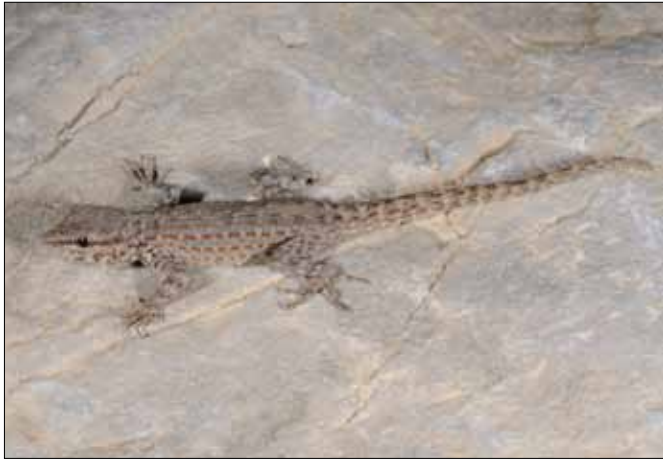

B

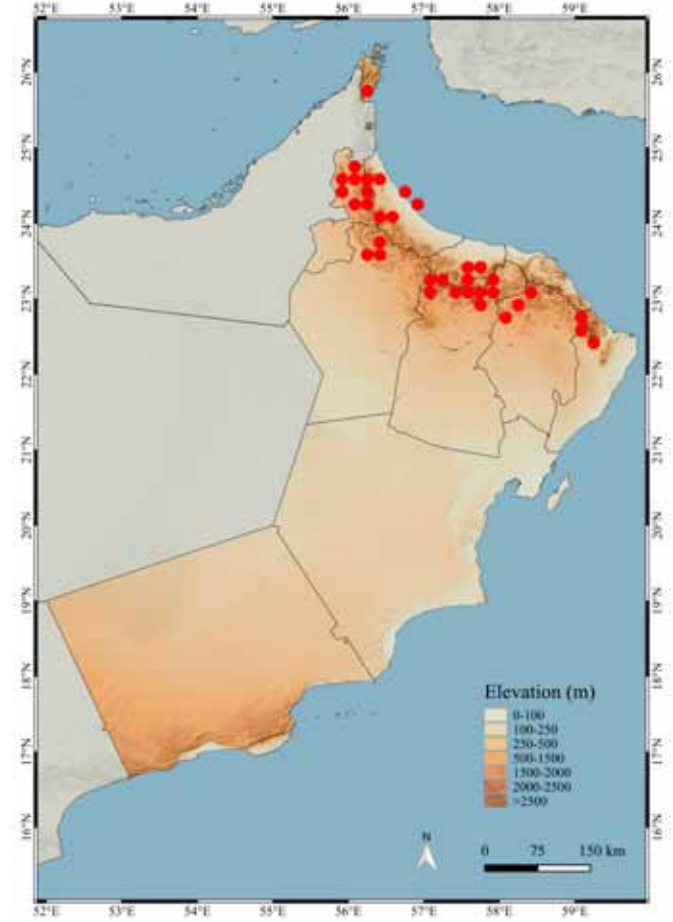

C

Useful information

|                             |    |
|-----------------------------|----|
| IUCN Category               | NE |
| Endemic                     | NO |
| Venomous                    | NO |
| Insular                     | NO |
| Present in a protected area | NO |

D

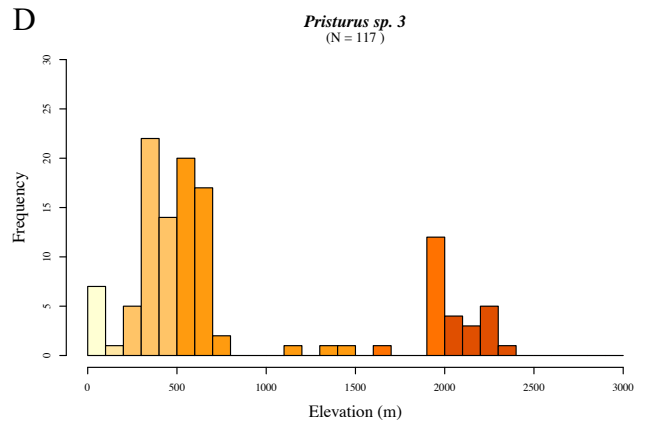

E

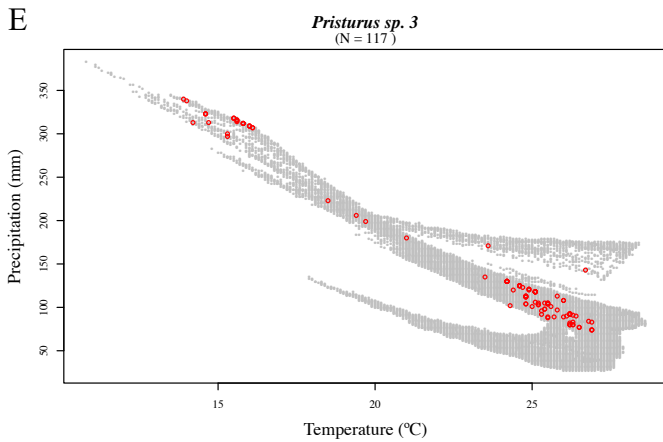

F

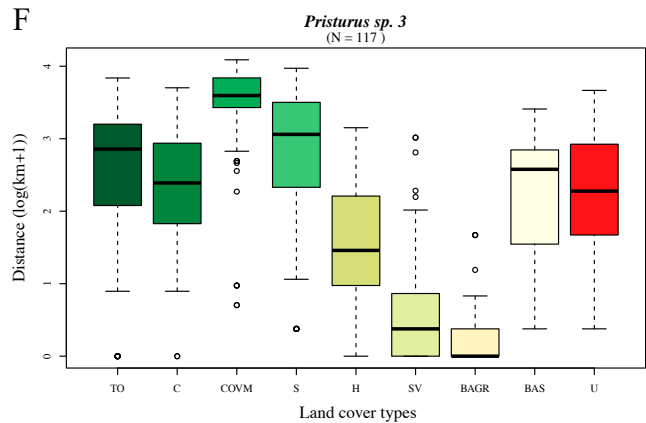

- Lizards
- Agamids
- Geckos
- Lacertids
- Skinks
- Amphisbaenids
- Varanids
- Snakes
- Boidae
- Colubridae
- Elapidae
- Lamprophiidae
- Leptotyphlopidae
- Typhlopidae
- Viperidae



**S57: Species information**

Lizards

Geckos, Sphaerodactylidae

***Pristurus sp. 4*  
Undescribed**

**B**

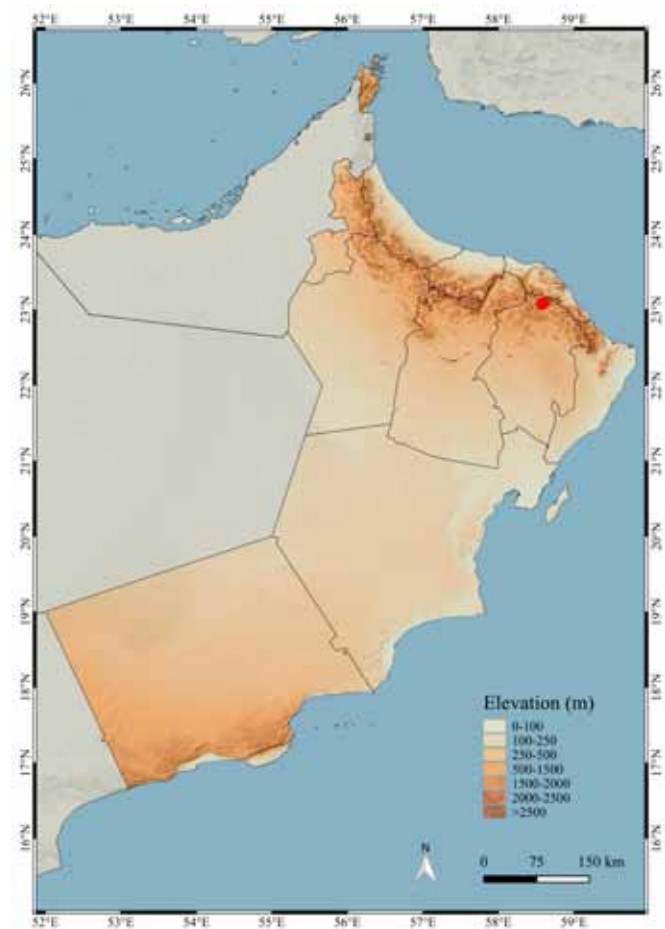

**A**

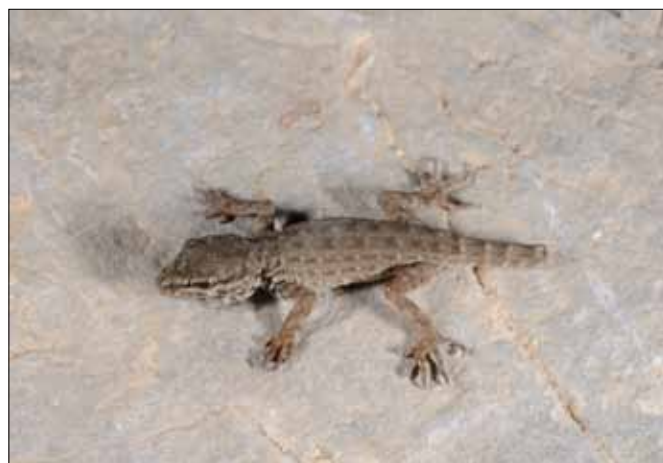

**C**

Useful information

|                             |     |
|-----------------------------|-----|
| IUCN Category               | NE  |
| Endemic                     | YES |
| Venomous                    | NO  |
| Insular                     | NO  |
| Present in a protected area | YES |

**D**

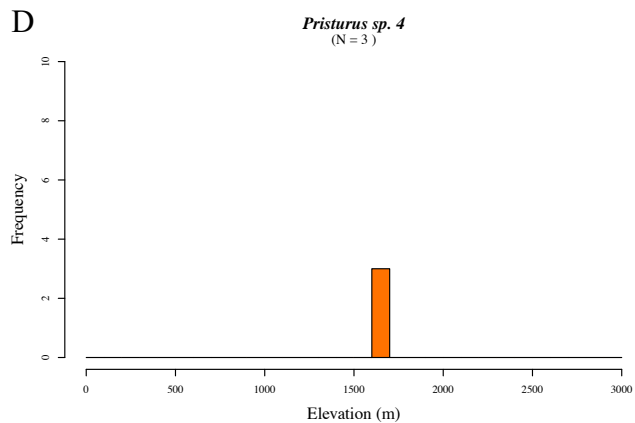

**F**

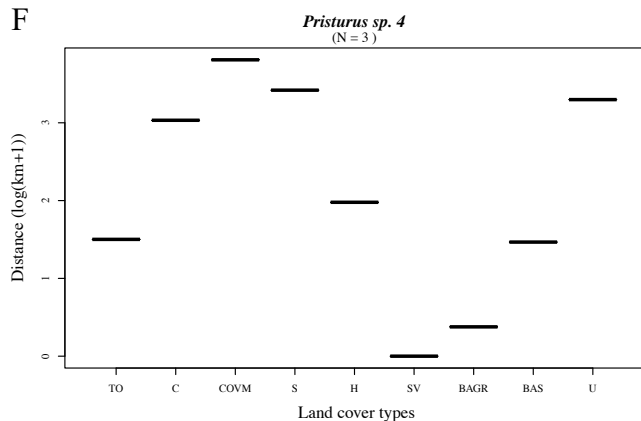

**E**

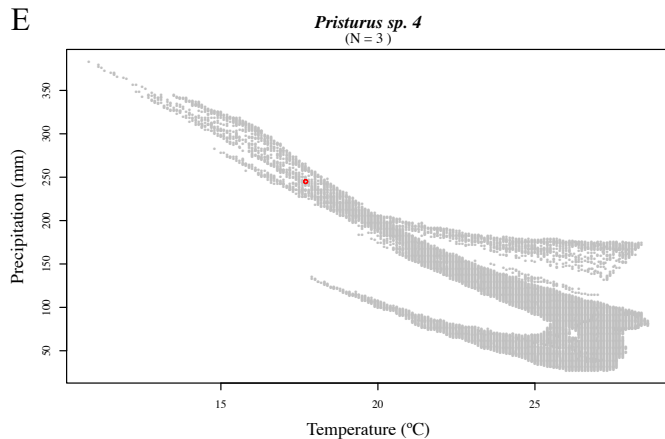

Lizards

Agamids

Geckos

Lacertids

Skinks

Amphisbaenids

Varamids

Snakes

Boidae

Colubridae

Elapidae

Lamprophiidae

Leptotyphlopidae

Typhlopidae

Viperidae

***Pristurus sp. 5***  
**Undescribed**

**S58: Species information**

Lizards

Geckos, Sphaerodactylidae

A

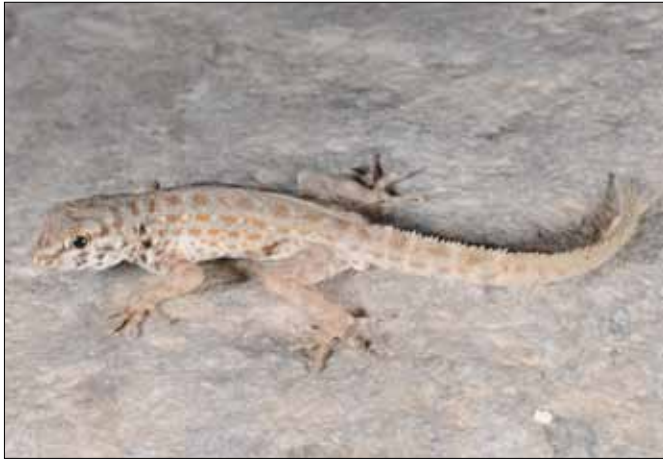

B

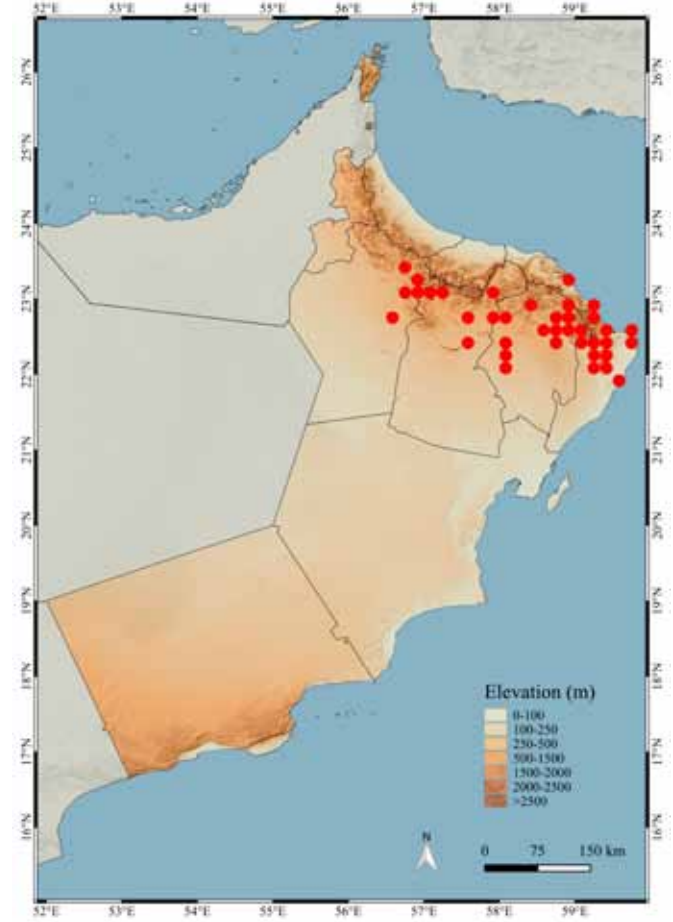

C

Useful information

|                             |     |
|-----------------------------|-----|
| IUCN Category               | NE  |
| Endemic                     | YES |
| Venomous                    | NO  |
| Insular                     | NO  |
| Present in a protected area | YES |

E

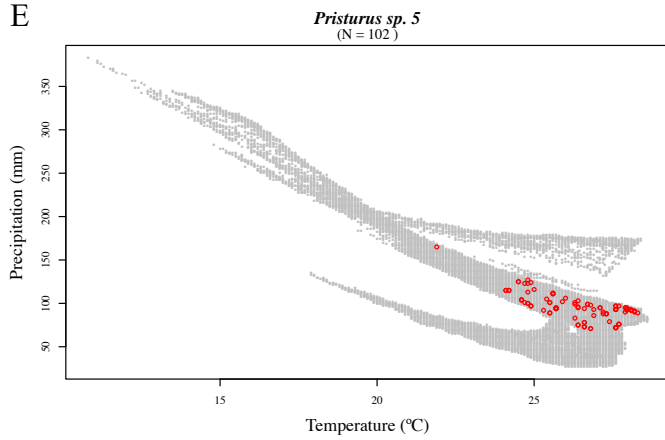

D

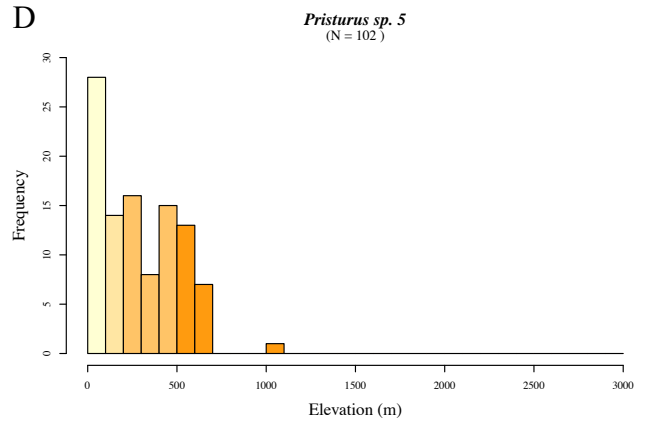

F

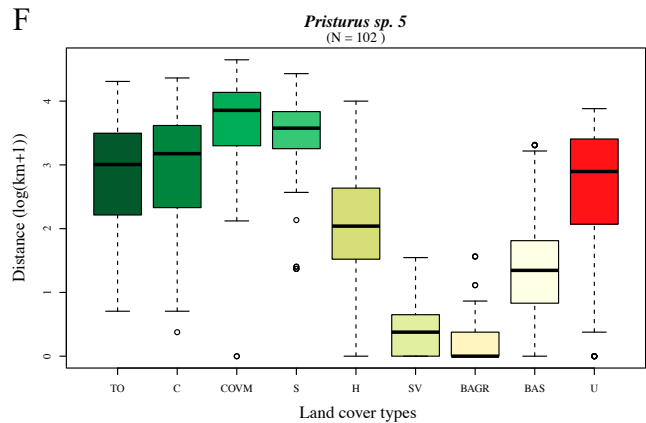

- Lizards
- Agamids
- Geckos
- Laecetids
- Skinks
- Amphisbaenids
- Varanids
- Snakes
- Boidae
- Colubridae
- Elapidae
- Lamprophiidae
- Leptotyphlopidae
- Typhlopidae
- Viperidae

**S59: Species information**

Lizards

Lacertids, Lacertidae

*Acanthodactylus blanfordii*  
Boulanger, 1918

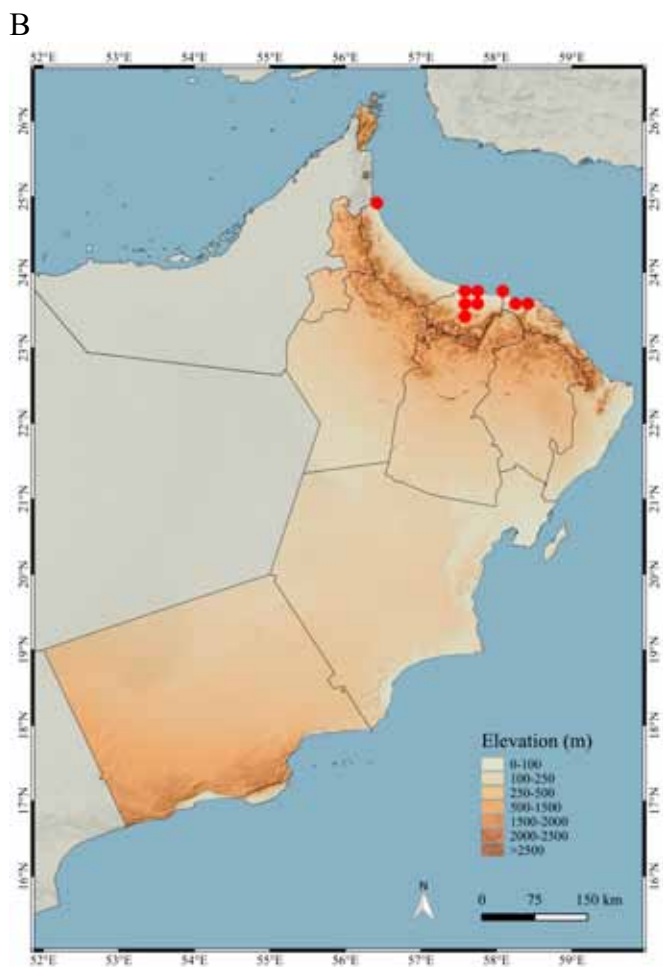

**A**

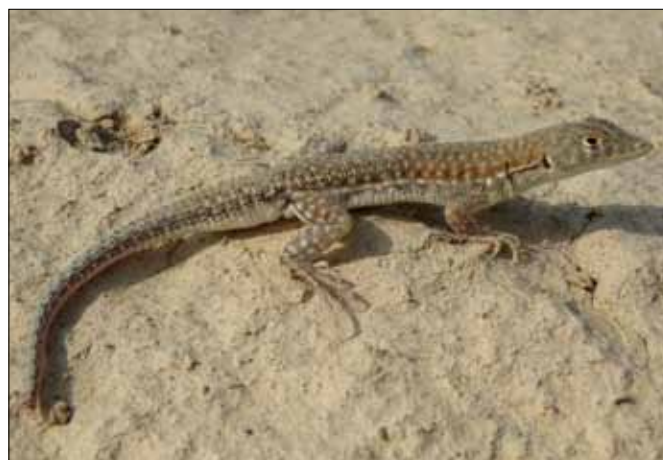

**C**

Useful information

|                             |     |
|-----------------------------|-----|
| IUCN Category               | LC* |
| Endemic                     | NO  |
| Venomous                    | NO  |
| Insular                     | NO  |
| Present in a protected area | YES |

\*Not available on the web

**D**

*Acanthodactylus blanfordii*  
(N = 27)

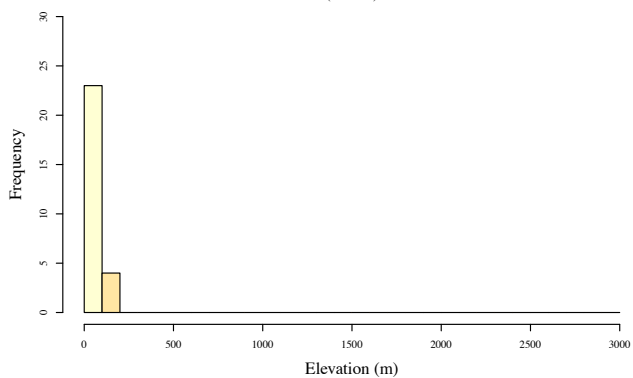

**F**

*Acanthodactylus blanfordii*  
(N = 27)

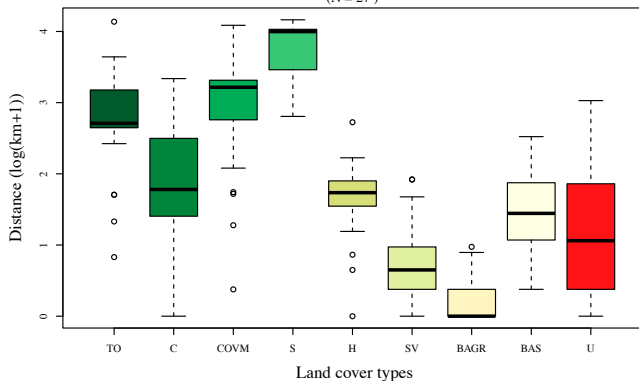

**E**

*Acanthodactylus blanfordii*  
(N = 27)

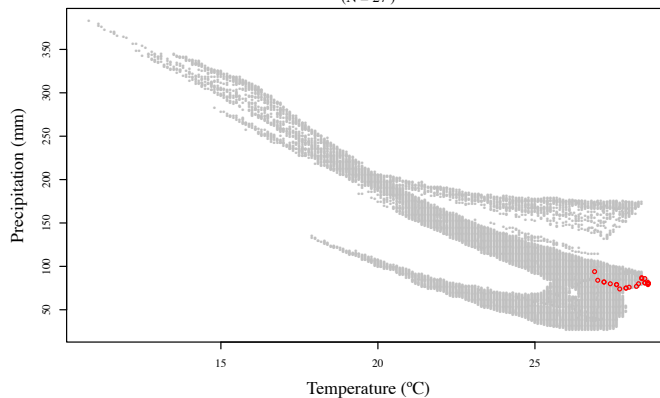

Lizards

Agamids

Geckos

Lacertids

Skinks

Amphisbaenids

Varamids

Snakes

Boidae

Colubridae

Elapidae

Lamprophidae

Leptotyphlopidae

Typhlopidae

Viperidae

***Acanthodactylus boskianus***  
(Daudin, 1802)

**S60: Species information**

Lizards

Lacertids, Lacertidae

A

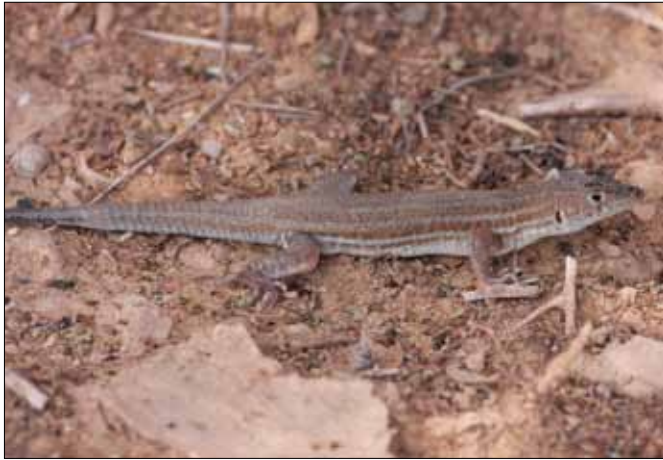

B

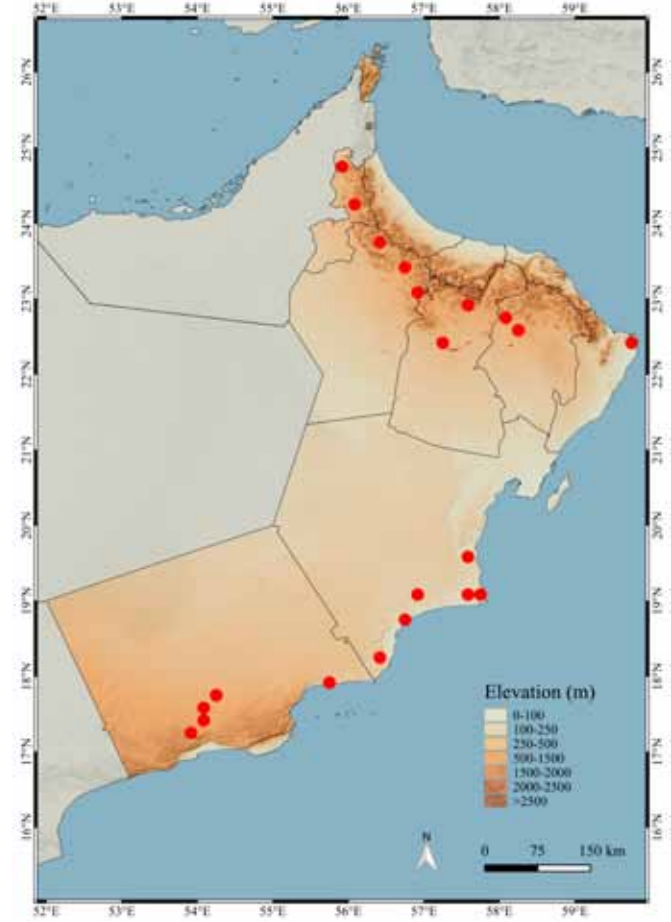

C

Useful information

|                             |     |
|-----------------------------|-----|
| IUCN Category               | LC* |
| Endemic                     | NO  |
| Venomous                    | NO  |
| Insular                     | NO  |
| Present in a protected area | NO  |

\*Not available on the web

D

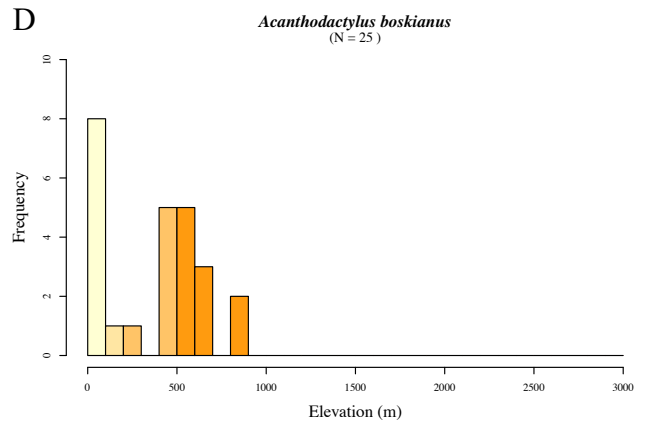

E

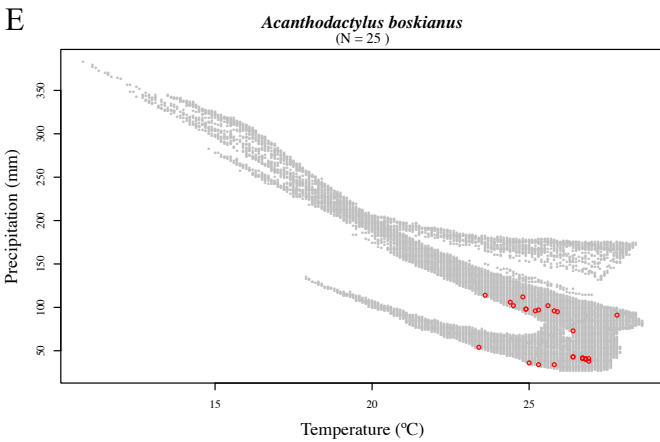

F

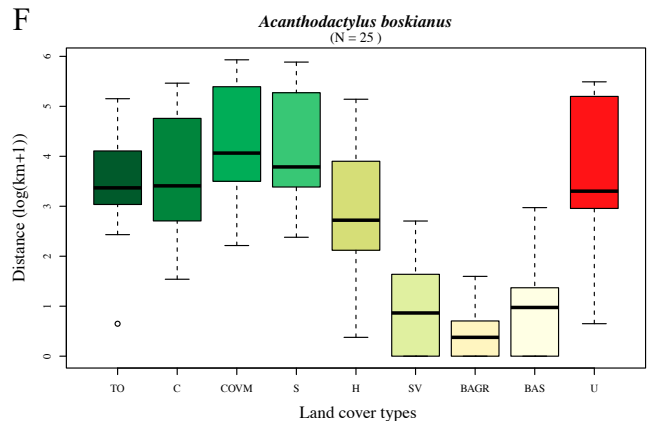

- Lizards
- Agamids
- Geckos
- Lacertids
- Skinks
- Amphisbaenids
- Varanids
- Snakes
- Boidae
- Colubridae
- Elapidae
- Lamprophiidae
- Leptotyphlopidae
- Typhlopidae
- Viperidae

**S61: Species information**

Lizards  
 Lacertids, Lacertidae

*Acanthodactylus felicitis*  
 Arnold, 1980

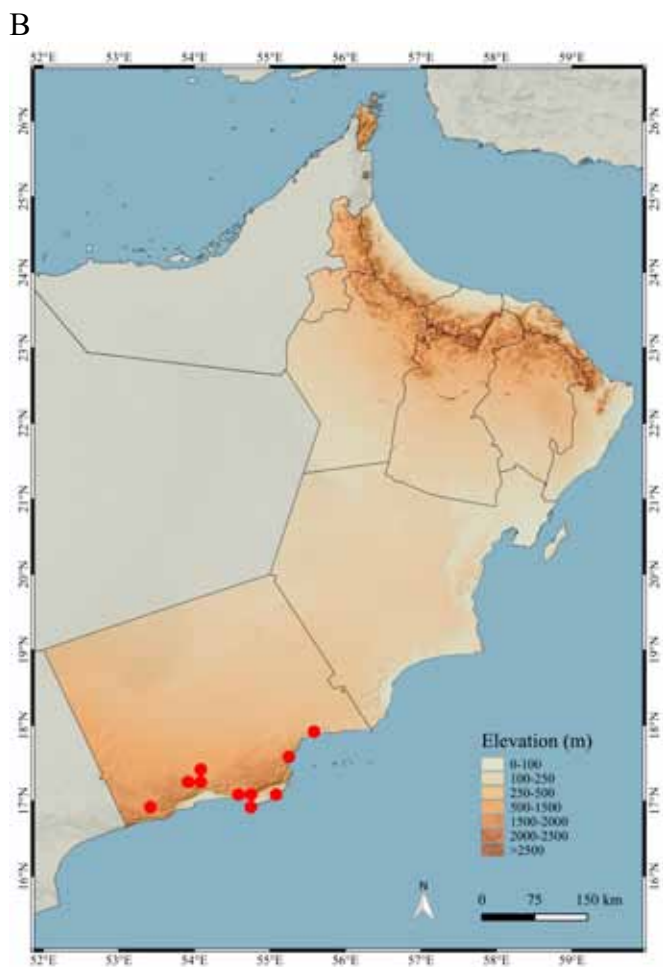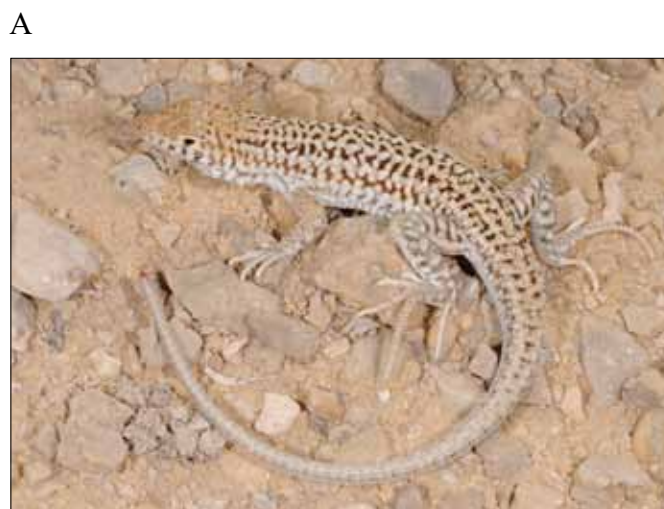

**C**

| Useful information          |     |
|-----------------------------|-----|
| IUCN Category               | VU  |
| Endemic                     | NO  |
| Venomous                    | NO  |
| Insular                     | NO  |
| Present in a protected area | YES |

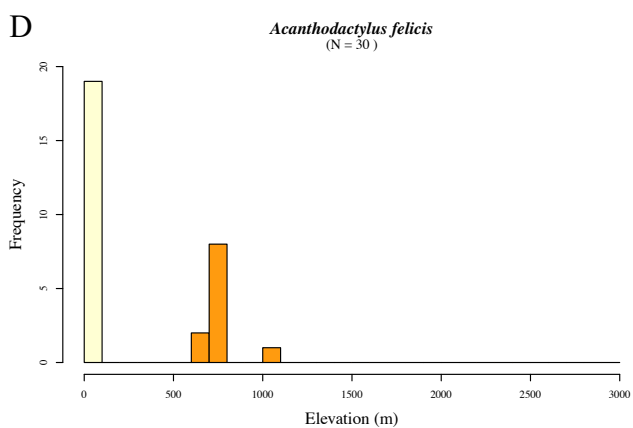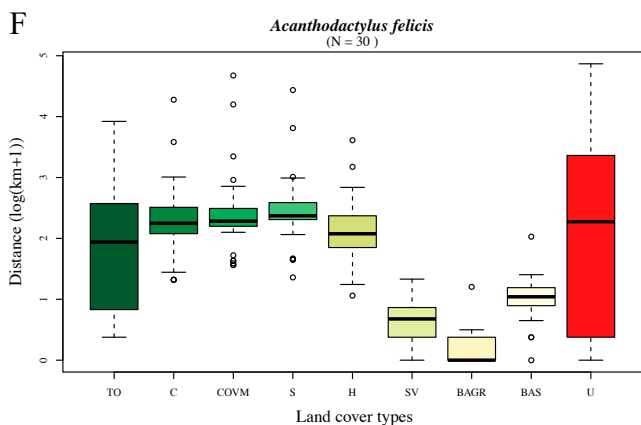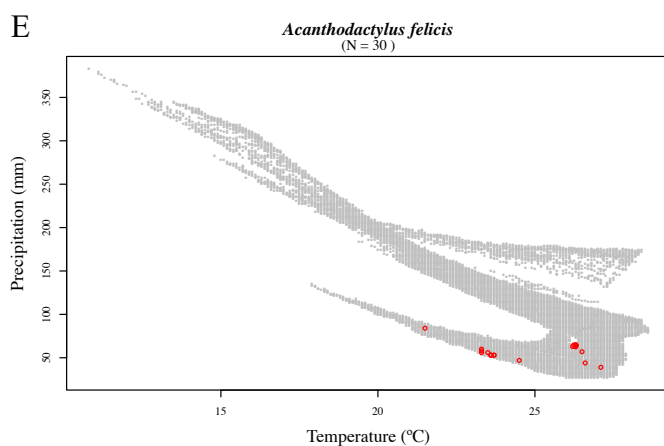

- Lizards
- Agamids
- Geckos
- Lacertids**
- Skinks
- Amphisbaenids
- Varamids
- Snakes
- Boidae
- Colubridae
- Elapidae
- Lamprophiidae
- Leptotyphlopidae
- Typhlopidae
- Viperidae

***Acanthodactylus haasi***  
 Leviton & Anderson, 1967

**S62: Species information**

Lizards

Lacertids, Lacertidae

A

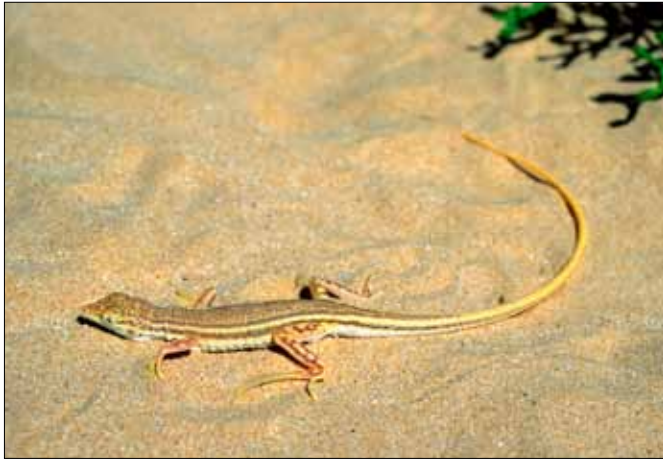

B

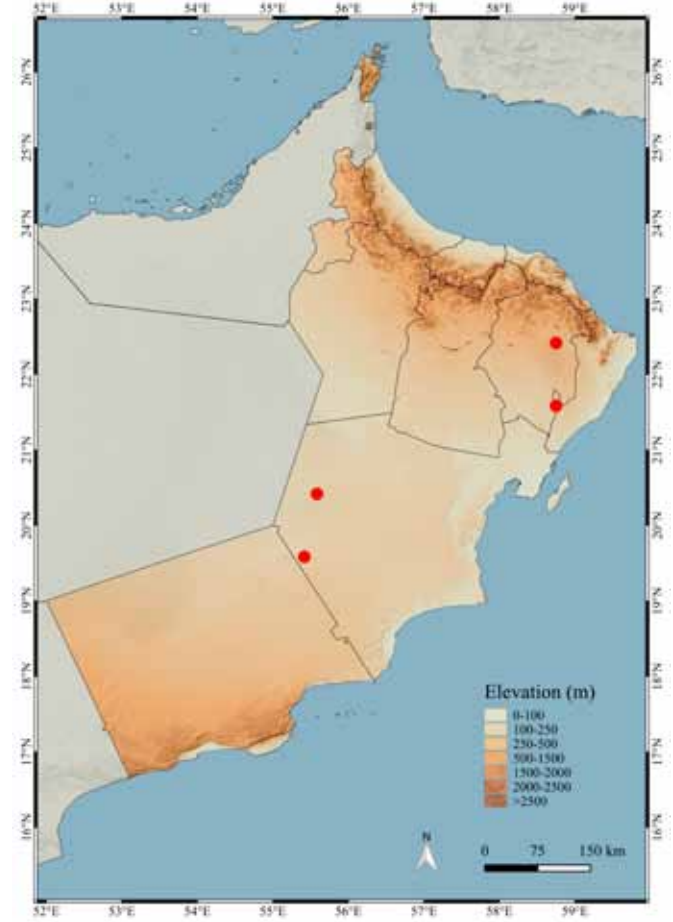

C

Useful information

|                             |    |
|-----------------------------|----|
| IUCN Category               | LC |
| Endemic                     | NO |
| Venomous                    | NO |
| Insular                     | NO |
| Present in a protected area | NO |

D

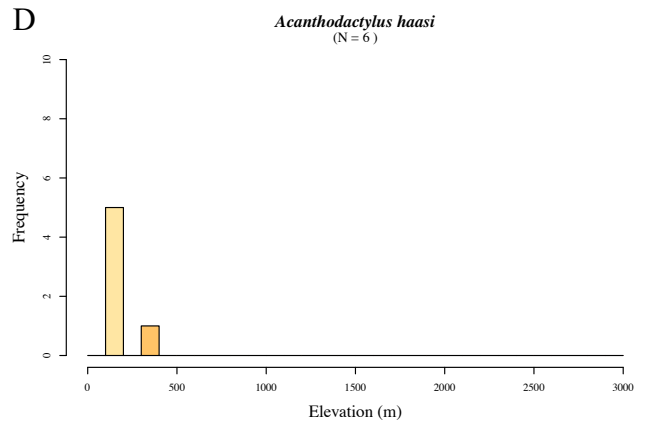

E

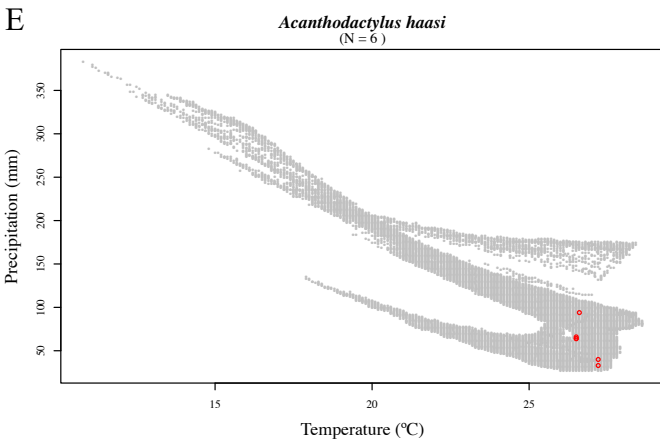

F

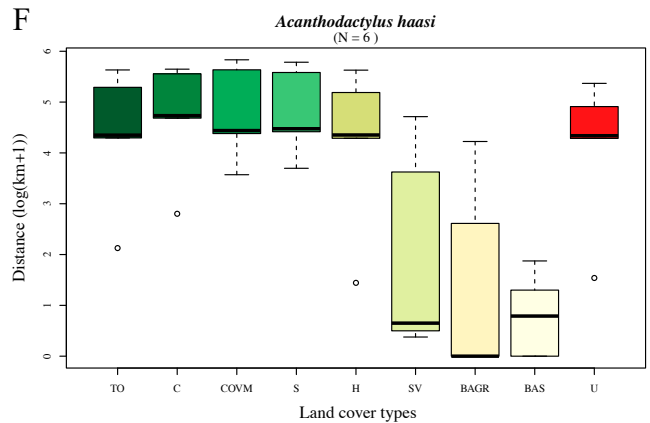

**S63: Species information**

Lizards

Lacertids, Lacertidae

*Acanthodactylus masirae*  
Arnold, 1980

**B**

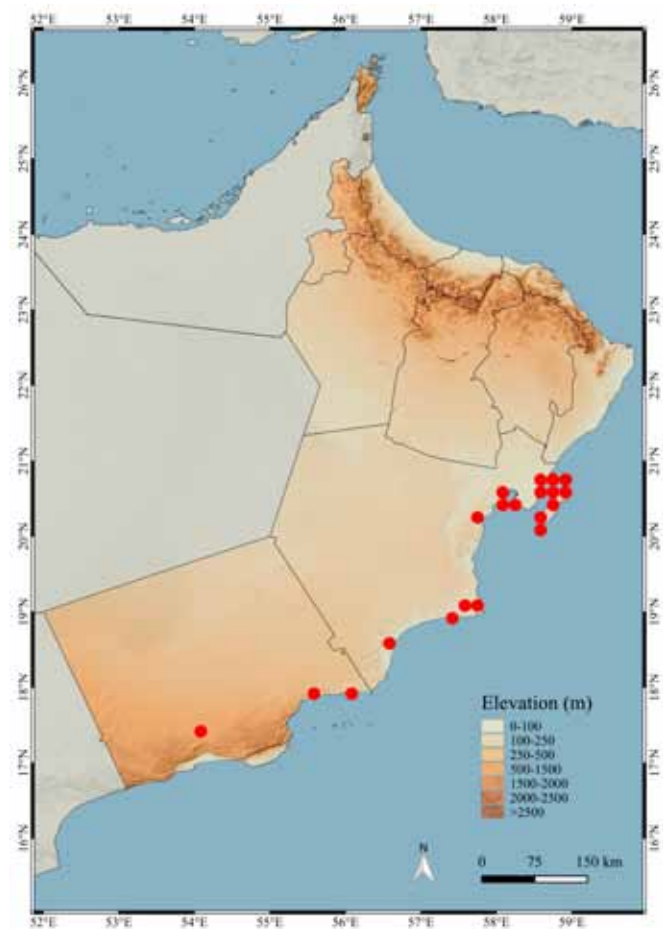

**A**

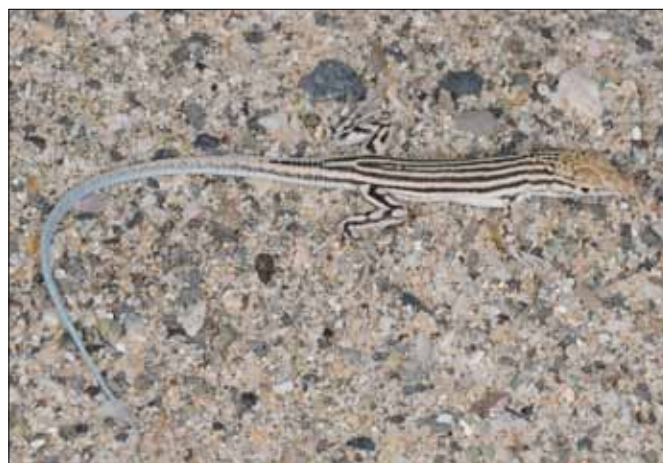

**C**

Useful information

|                             |     |
|-----------------------------|-----|
| IUCN Category               | DD  |
| Endemic                     | YES |
| Venomous                    | NO  |
| Insular                     | YES |
| Present in a protected area | YES |

**D**

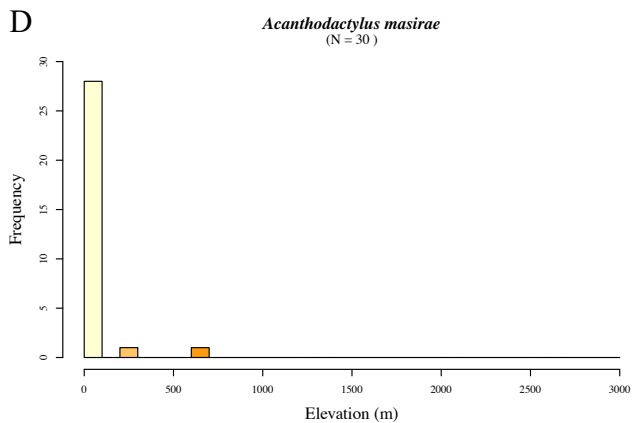

**F**

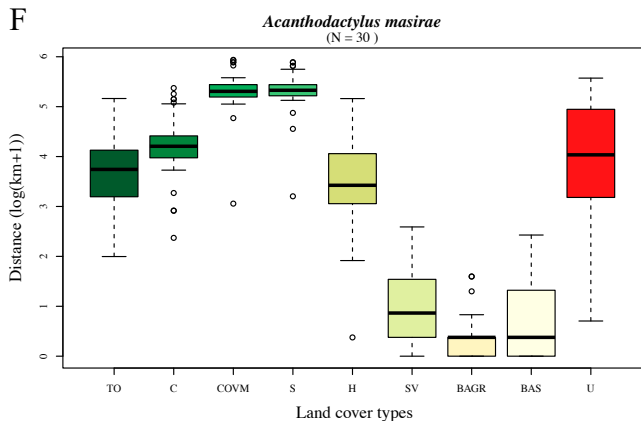

**E**

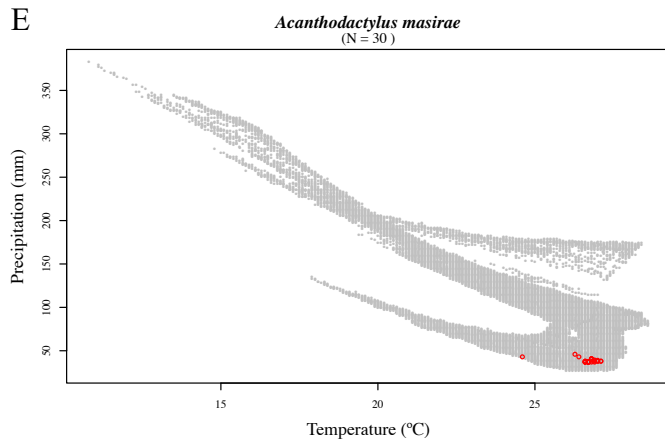

Lizards

Agamids

Geckos

**Lacertids**

Skinks

Amphisbaenids

Varamids

Snakes

Boidae

Colubridae

Elapidae

Lamprophiidae

Leptotyphlopidae

Typhlopidae

Viperidae

***Acanthodactylus ophiodurus***  
**Arnold, 1980**

**S64: Species information**

Lizards

Lacertids, Lacertidae

A

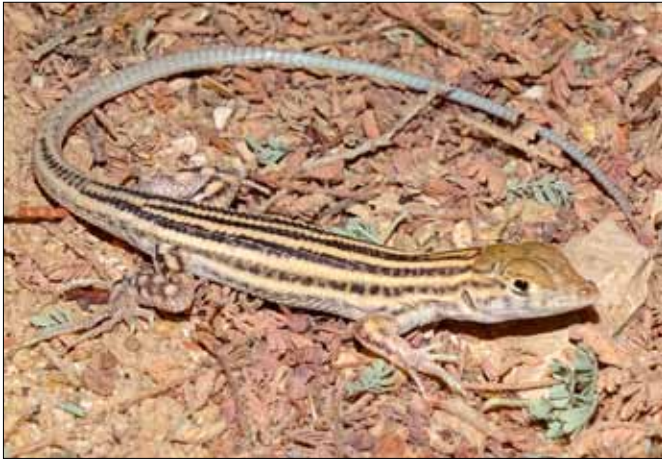

B

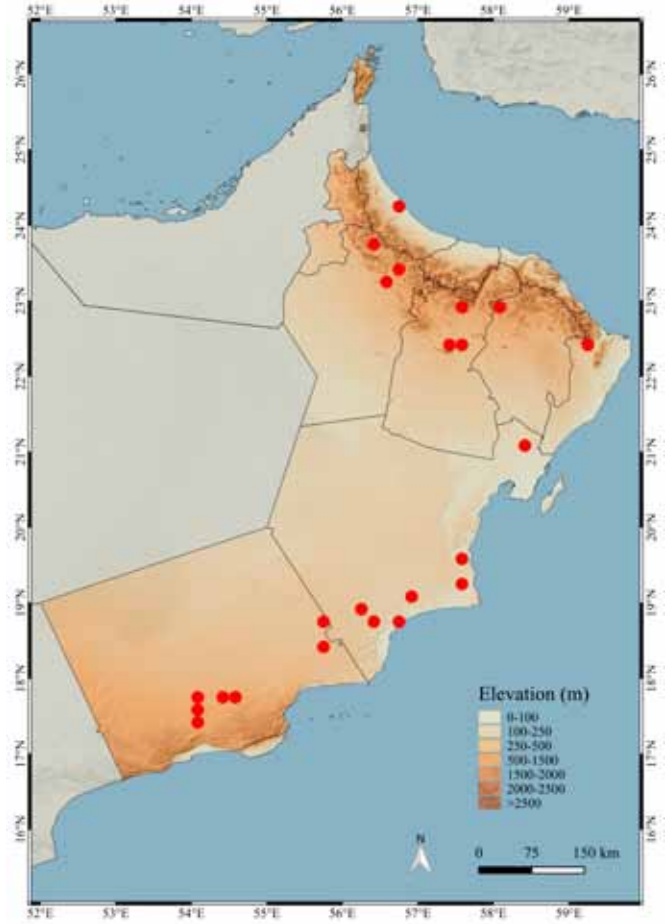

C

Useful information

|                             |    |
|-----------------------------|----|
| IUCN Category               | LC |
| Endemic                     | NO |
| Venomous                    | NO |
| Insular                     | NO |
| Present in a protected area | NO |

D

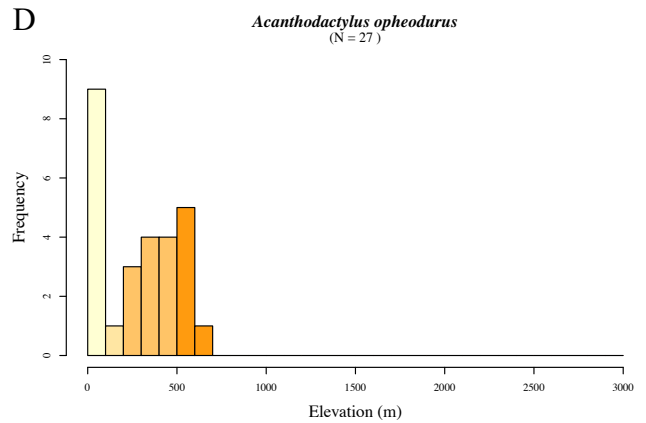

E

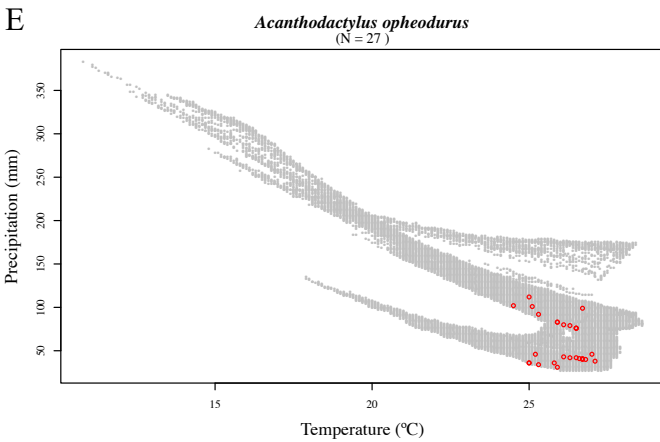

F

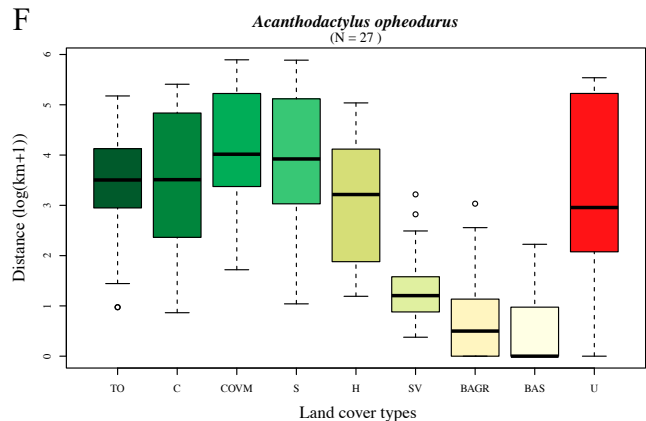

- Lizards
- Agamids
- Gekkos
- Lacertids
- Skinks
- Amphisbaenids
- Varanids
- Snakes
- Boidae
- Colubridae
- Elapidae
- Lamprophiidae
- Leptotyphlopidae
- Typhlopidae
- Viperidae



**S65: Species information**

Lizards

Lacertids, Lacertidae

*Acanthodactylus schmidti*

Haas, 1957

**B**

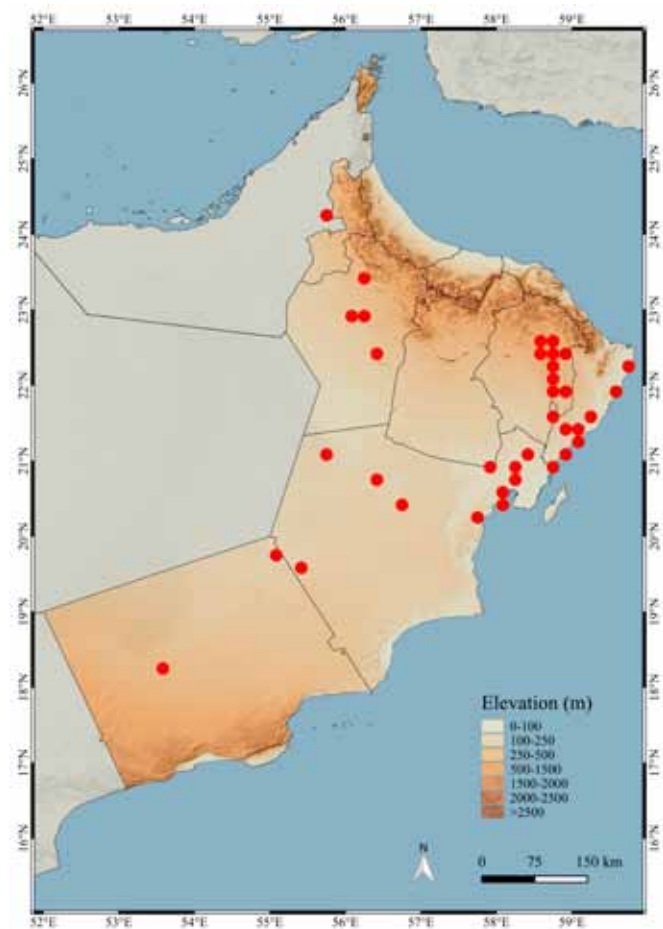

**A**

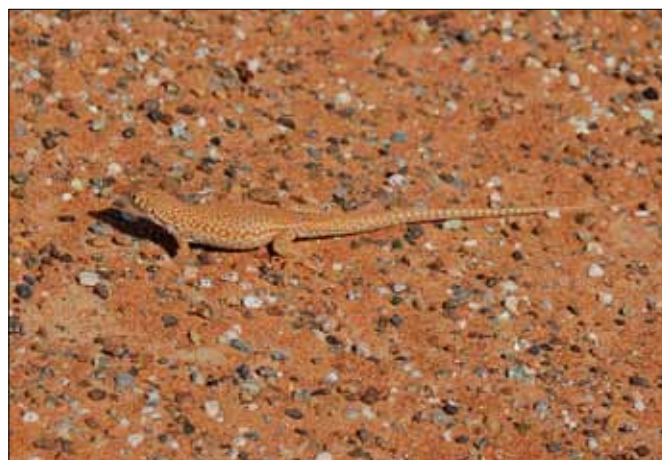

**C**

Useful information

|                             |     |
|-----------------------------|-----|
| IUCN Category               | LC  |
| Endemic                     | NO  |
| Venomous                    | NO  |
| Insular                     | NO  |
| Present in a protected area | YES |

**D**

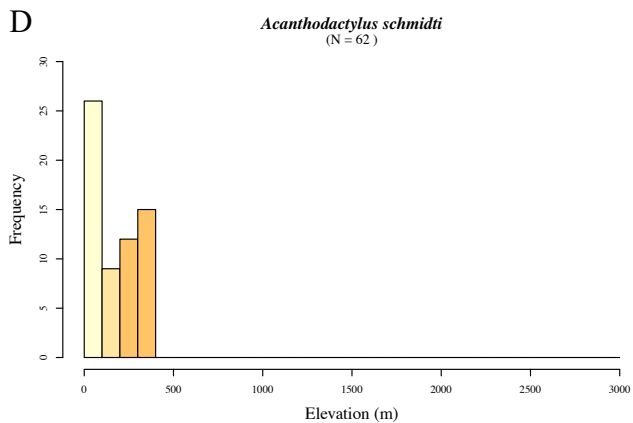

**F**

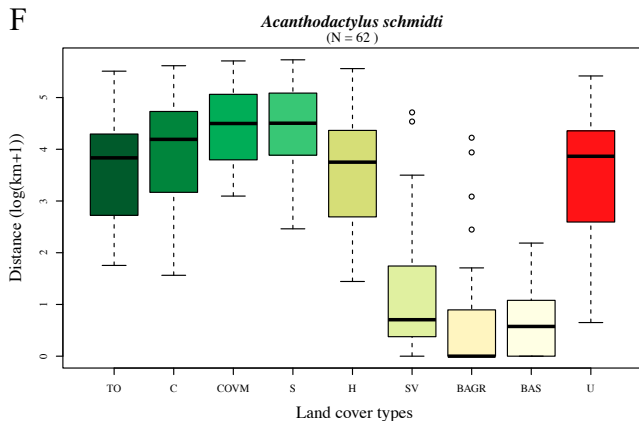

**E**

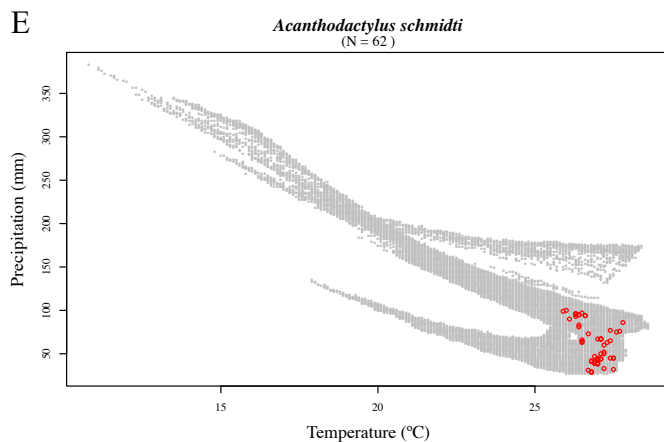

Lizards

Agamids

Geckos

Lacertids

Skinks

Amphisbaenids

Varamids

Snakes

Boidae

Colubridae

Elapidae

Lamprophiidae

Leptotyphlopidae

Typhlopidae

Viperidae

**Mesalina adramitana**  
(Boulenger, 1917)

**S66: Species information**

Lizards

Lacertids, Lacertidae

A

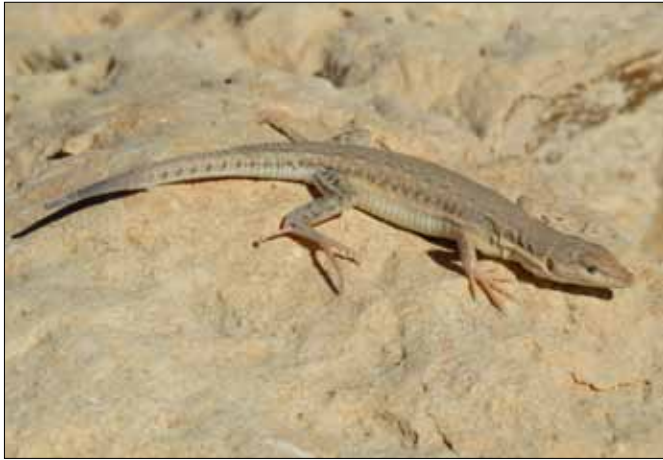

B

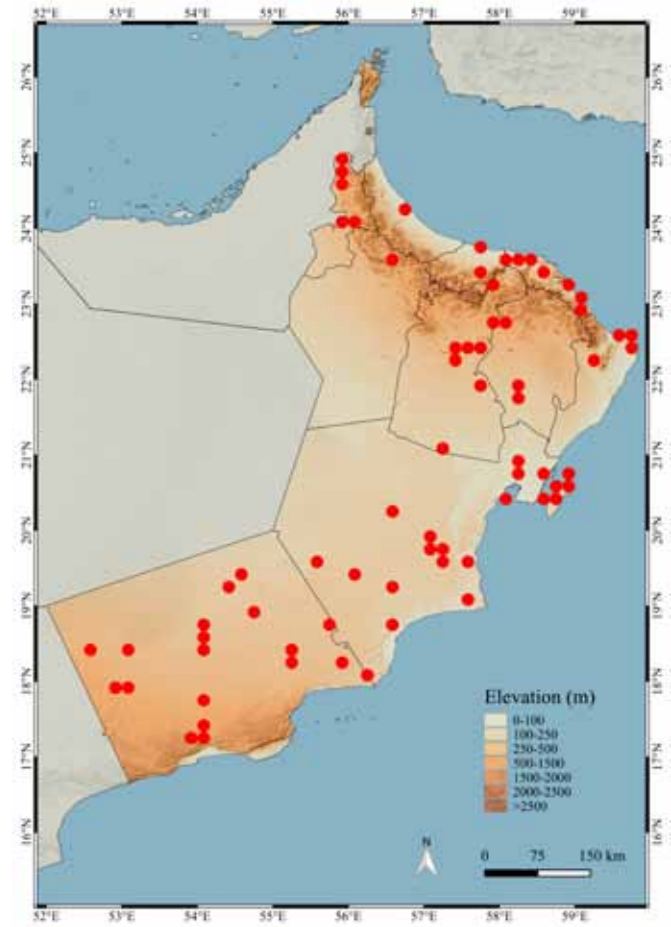

C

Useful information

|                             |     |
|-----------------------------|-----|
| IUCN Category               | LC  |
| Endemic                     | NO  |
| Venomous                    | NO  |
| Insular                     | YES |
| Present in a protected area | YES |

D

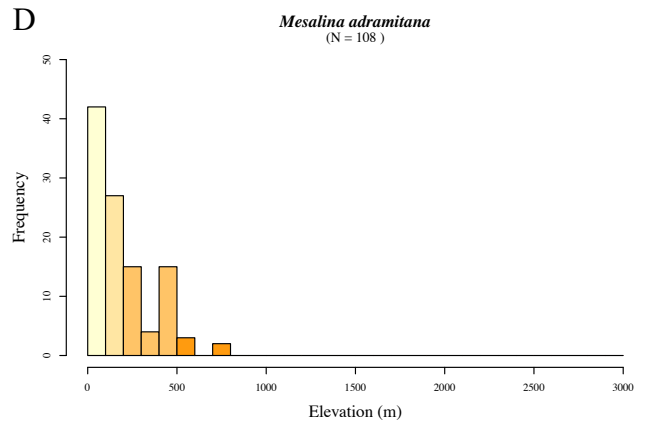

E

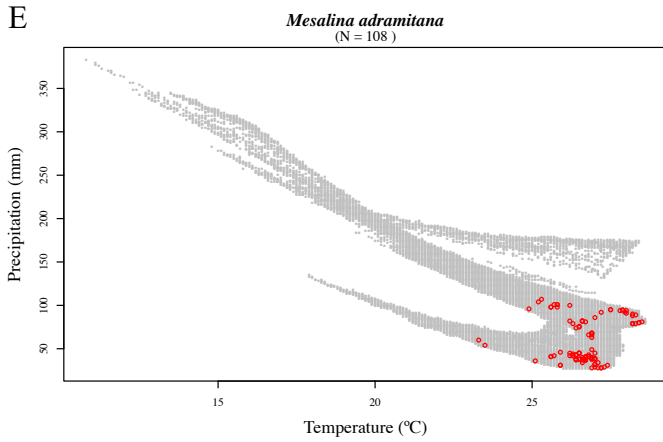

F

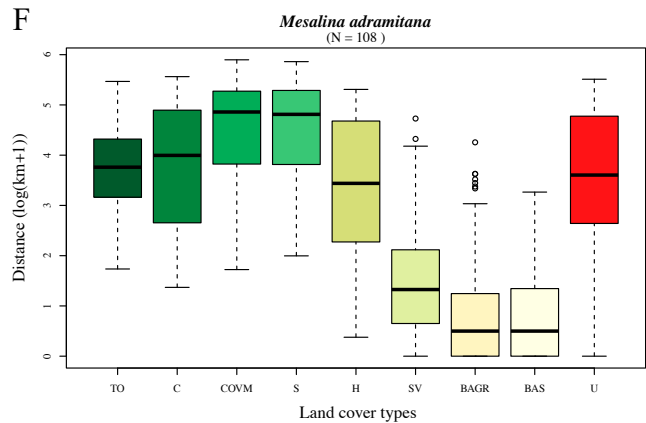

- Lizards
- Agamids
- Geckos
- Lacertids
- Skinks
- Amphisbaenids
- Varanids
- Snakes
- Boidae
- Colubridae
- Elapidae
- Lamprophiidae
- Leptotyphlopidae
- Typhlopidae
- Viperidae

**S67: Species information**

Lizards

Lacertids, Lacertidae

***Mesalina ayunensis*  
Arnold, 1980**

**B**

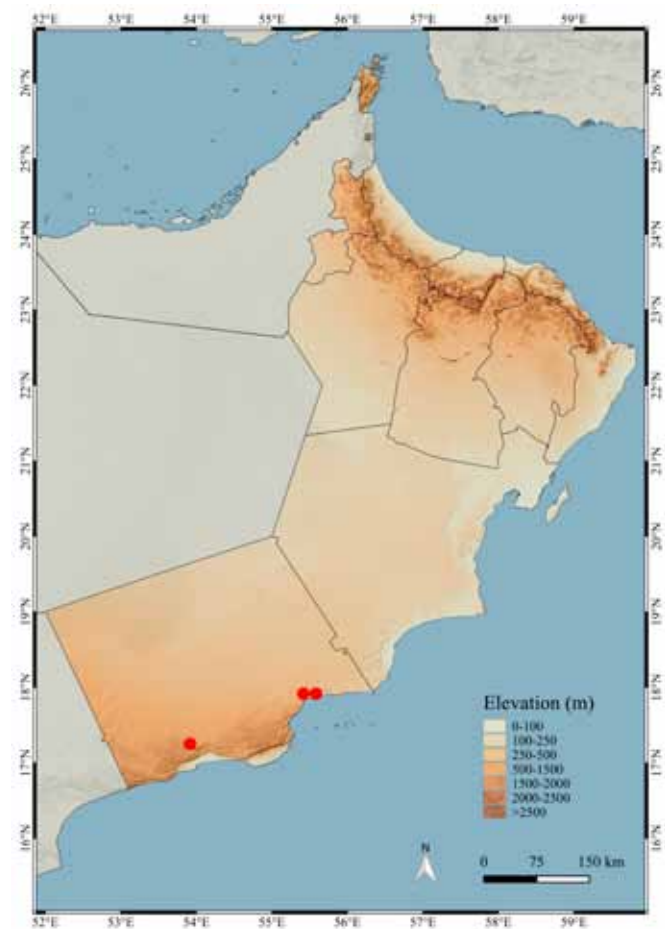

**A**

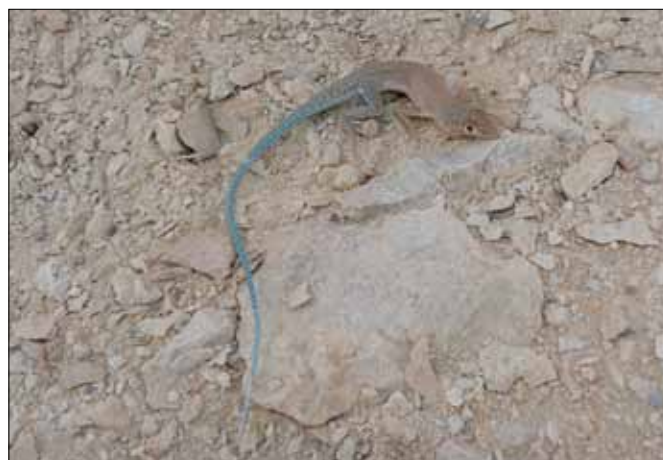

**C**

Useful information

|                             |    |
|-----------------------------|----|
| IUCN Category               | DD |
| Endemic                     | NO |
| Venomous                    | NO |
| Insular                     | NO |
| Present in a protected area | NO |

**D**

*Mesalina ayunensis*  
(N = 5)

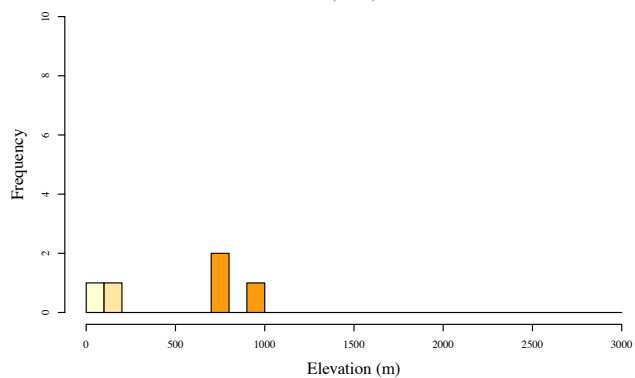

**F**

*Mesalina ayunensis*  
(N = 5)

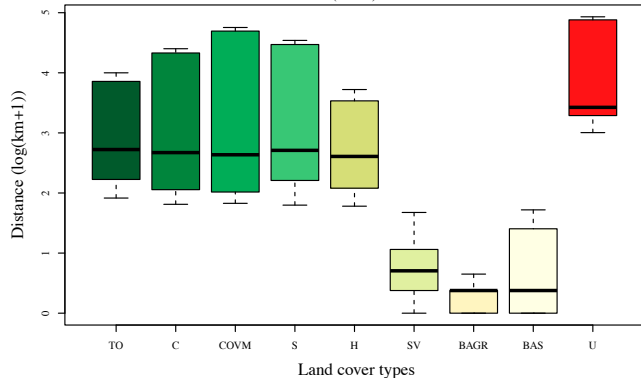

**E**

*Mesalina ayunensis*  
(N = 5)

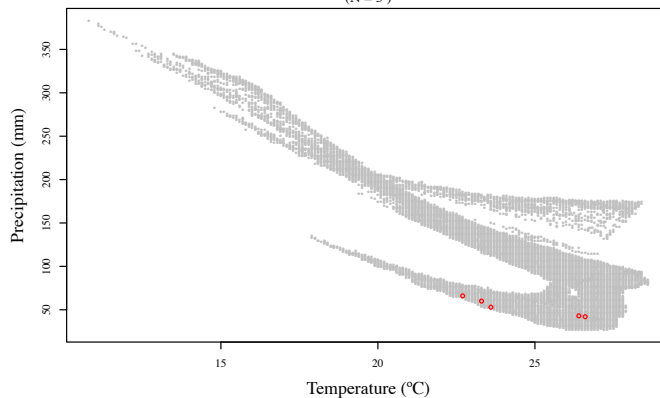

Lizards

Agamids

Geckos

**Lacertids**

Skinks

Amphisbaenids

Varamids

Snakes

Boidae

Colubridae

Elapidae

Lamprophiidae

Leptotyphlopidae

Typhlopidae

Viperidae

**Mesalina sp. 1**  
Undescribed

**S68: Species information**

Lizards

Lacertids, Lacertidae

A

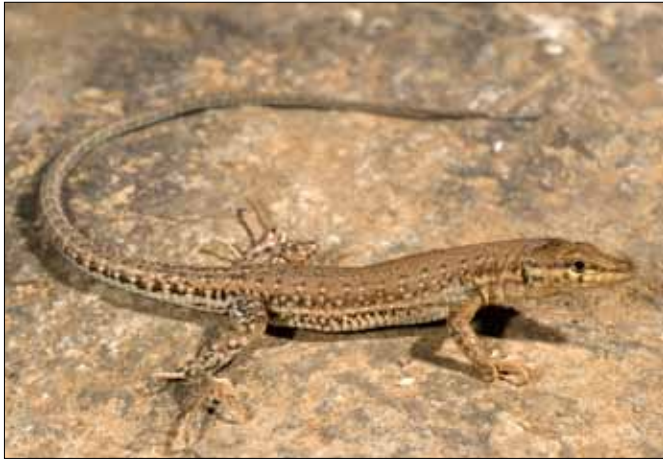

B

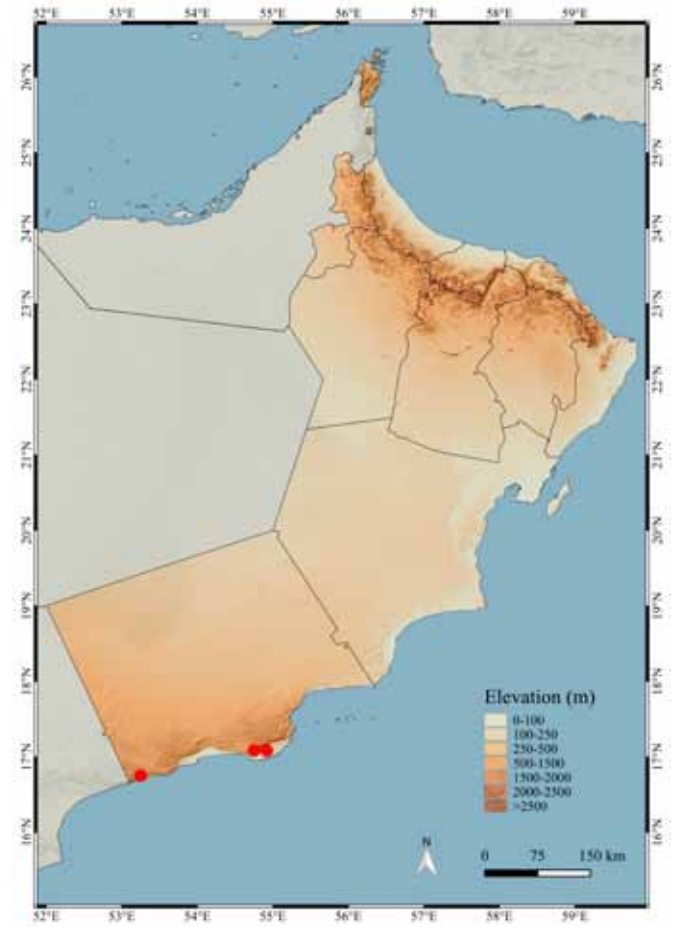

C

Useful information

|                             |     |
|-----------------------------|-----|
| IUCN Category               | NE  |
| Endemic                     | NO  |
| Venomous                    | NO  |
| Insular                     | NO  |
| Present in a protected area | YES |

D

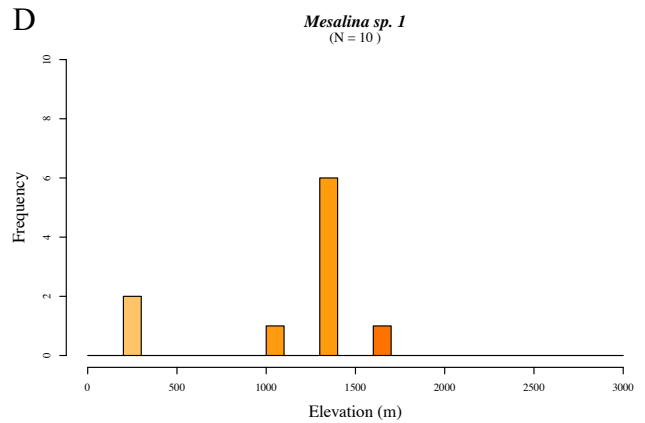

E

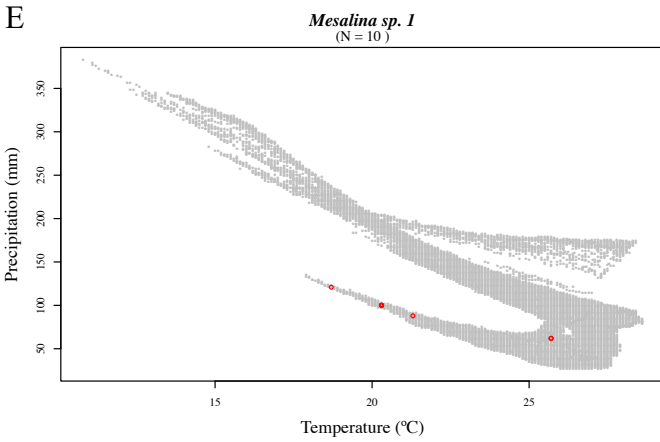

F

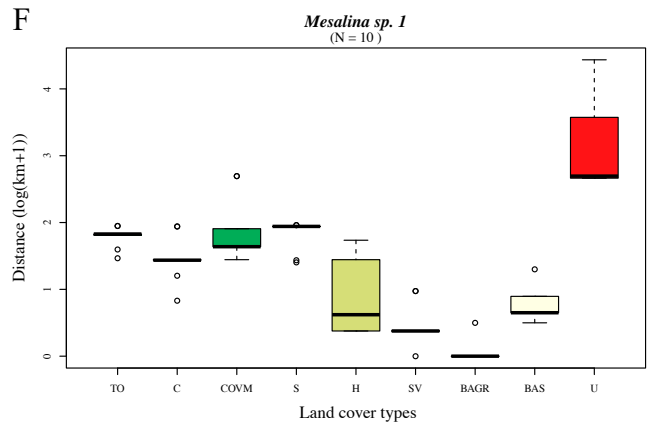

**S69: Species information**

Lizards

Lacertids, Lacertidae

***Mesalina* sp. 2**  
Undescribed

**B**

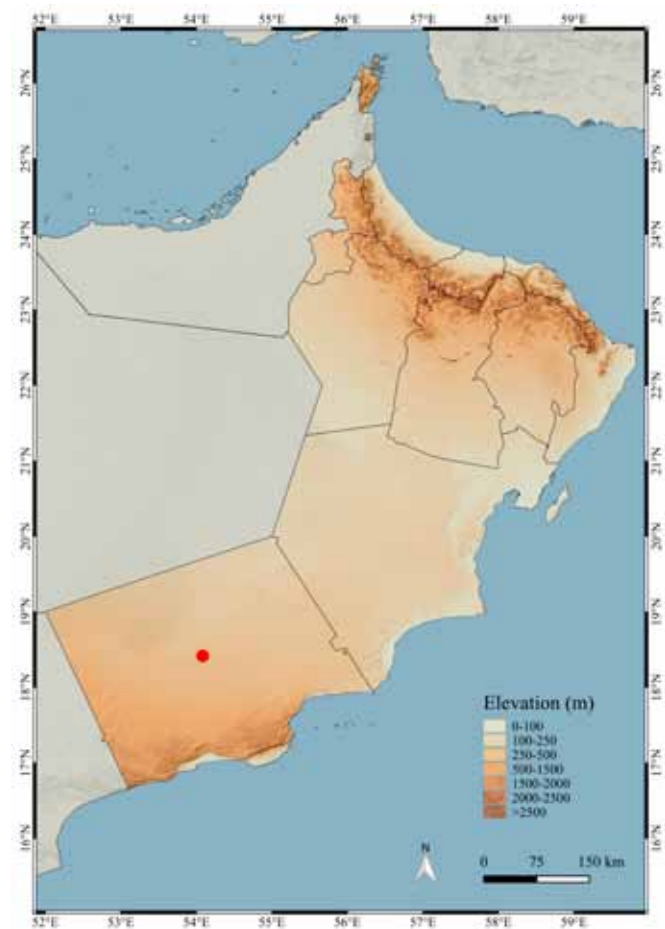

**A**

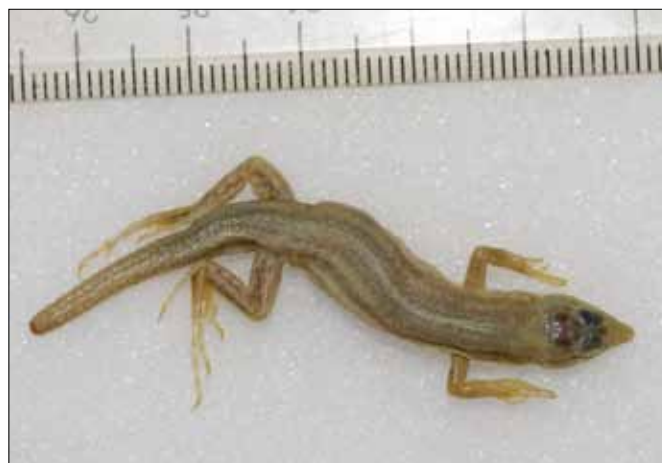

Specimen code: **BMNH1976.1470**

**C**

Useful information

|                             |     |
|-----------------------------|-----|
| IUCN Category               | NE  |
| Endemic                     | YES |
| Venomous                    | NO  |
| Insular                     | NO  |
| Present in a protected area | NO  |

**D**

*Mesalina* sp. 2  
(N = 1)

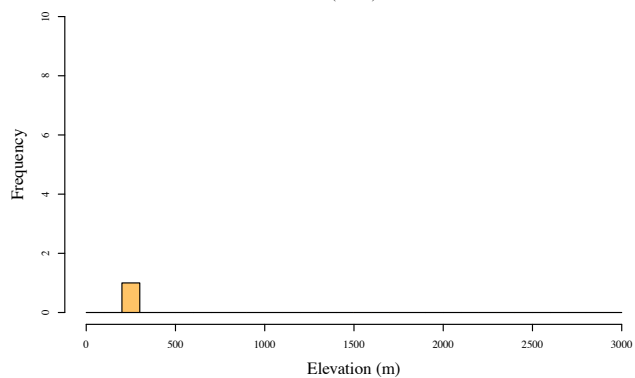

**F**

*Mesalina* sp. 2  
(N = 1)

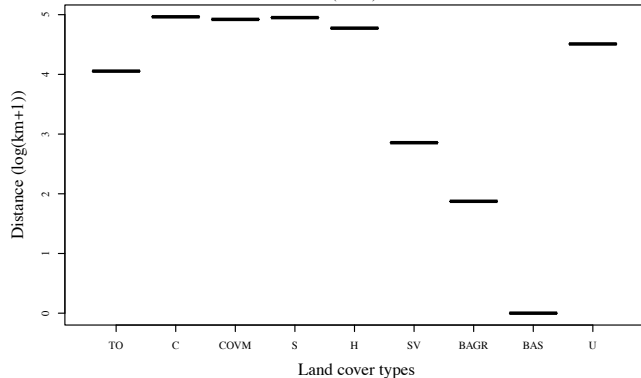

**E**

*Mesalina* sp. 2  
(N = 1)

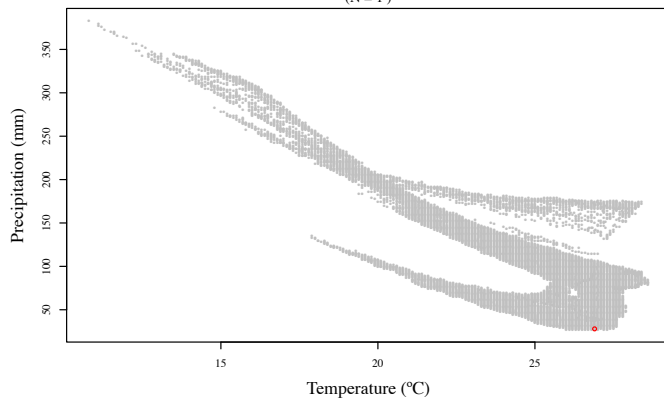

Lizards

Agamids

Geckos

Lacertids

Skinks

Amphisbaenids

Varamids

Snakes

Boidae

Colubridae

Elapidae

Lamprophiidae

Leptotyphlopidae

Typhlopidae

Viperidae

***Omanosaura cyanura***  
(Arnold, 1972)

**S70: Species information**

Lizards

Lacertids, Lacertidae

A

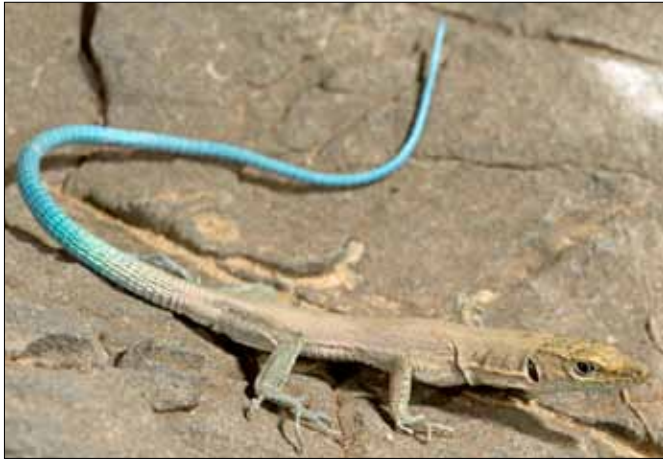

B

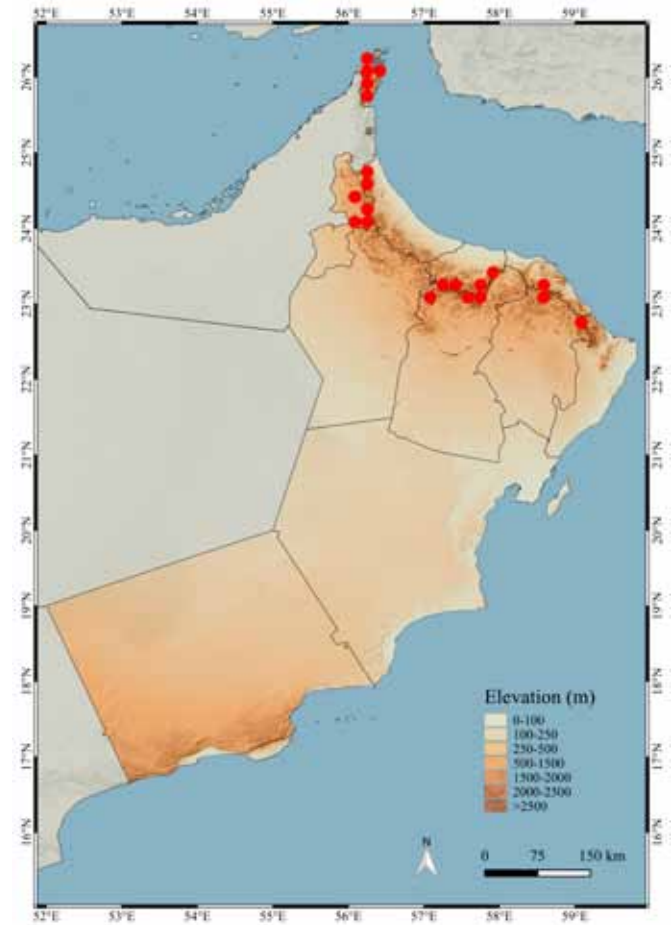

C

Useful information

|                             |     |
|-----------------------------|-----|
| IUCN Category               | LC  |
| Endemic                     | NO  |
| Venomous                    | NO  |
| Insular                     | NO  |
| Present in a protected area | YES |

D

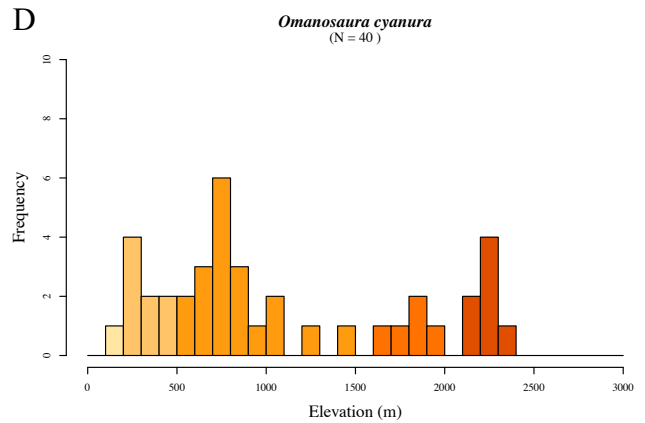

E

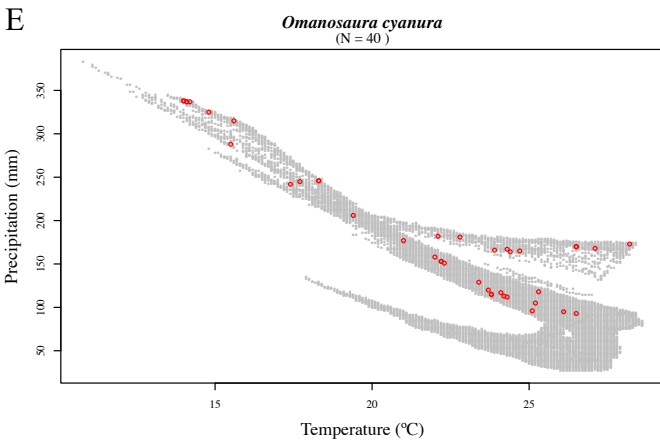

F

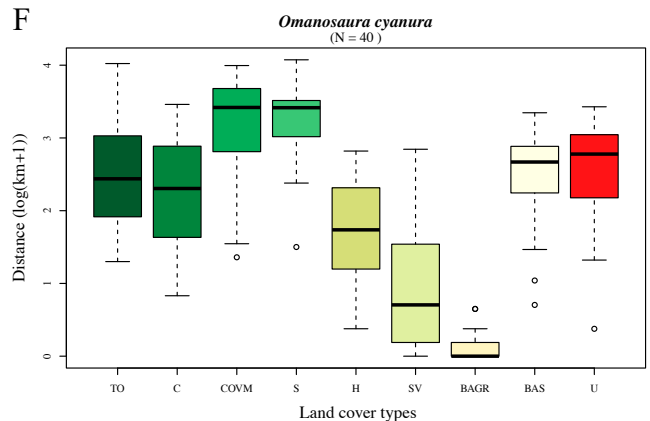

- Lizards
- Agamids
- Geckos
- Lacertids
- Skinks
- Amphisbaenids
- Varanids
- Snakes
- Boidae
- Colubridae
- Elapidae
- Lamprophiidae
- Leptotyphlopidae
- Typhlopidae
- Viperidae

**S71: Species information**

Lizards

Lacertids, Lacertidae

***Omanosaura jayakari***  
(Boulenger, 1887)

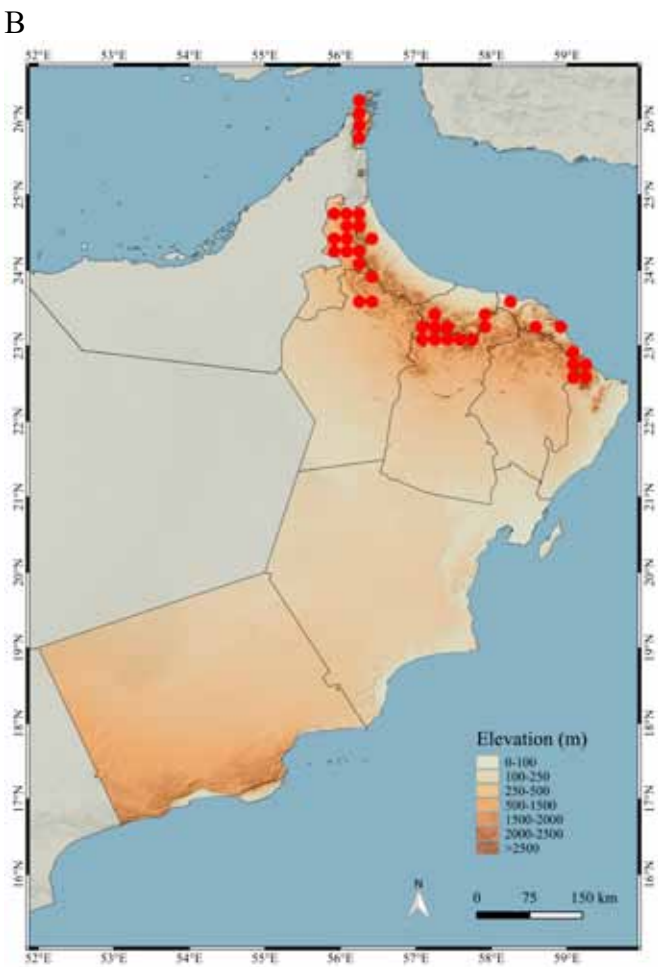

**A**

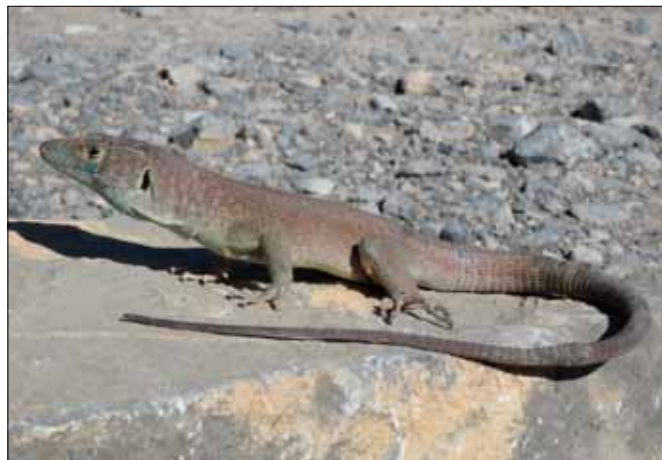

**C**

Useful information

|                             |     |
|-----------------------------|-----|
| IUCN Category               | LC  |
| Endemic                     | NO  |
| Venomous                    | NO  |
| Insular                     | NO  |
| Present in a protected area | YES |

**D**

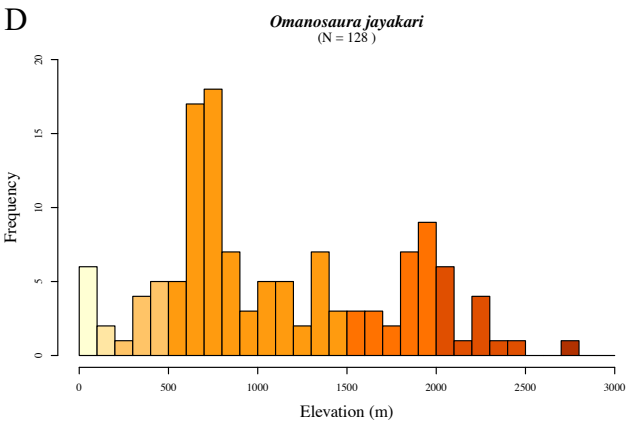

**F**

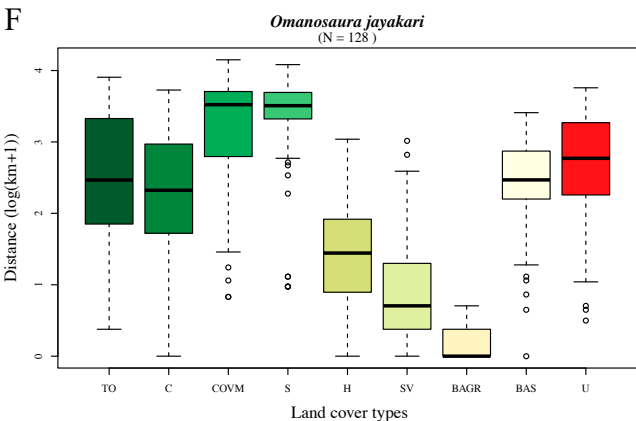

**E**

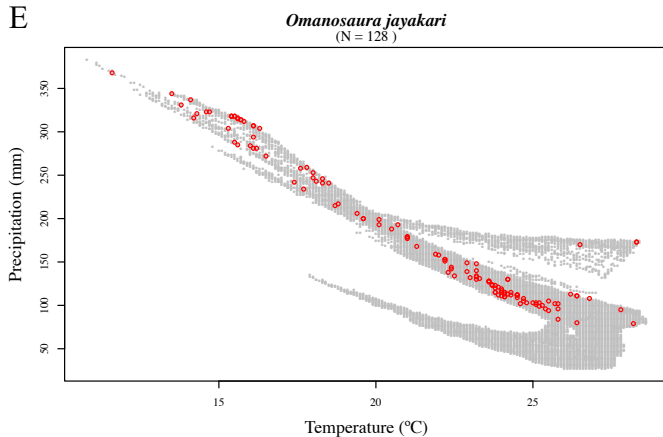

Lizards

Agamids

Geckos

Lacertids

Skinks

Amphisbaenids

Varamids

Snakes

Boidae

Colubridae

Elapidae

Lamprophiidae

Leptotyphlopidae

Typhlopidae

Viperidae

***Ablepharus pannonicus***  
(Fitzinger, 1824)

**S72: Species information**

Lizards  
Skinks, Scincidae

A

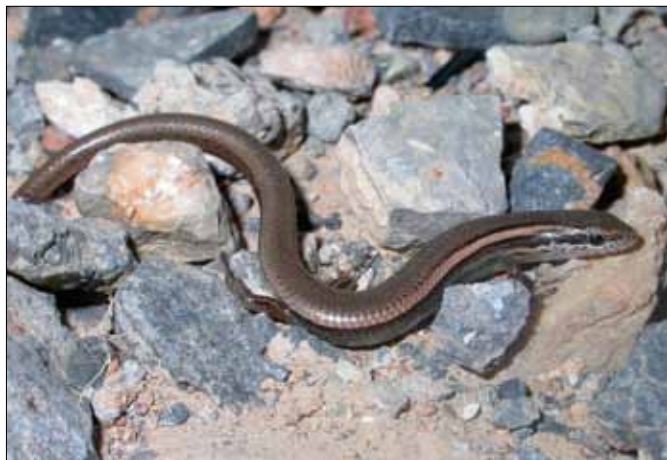

B

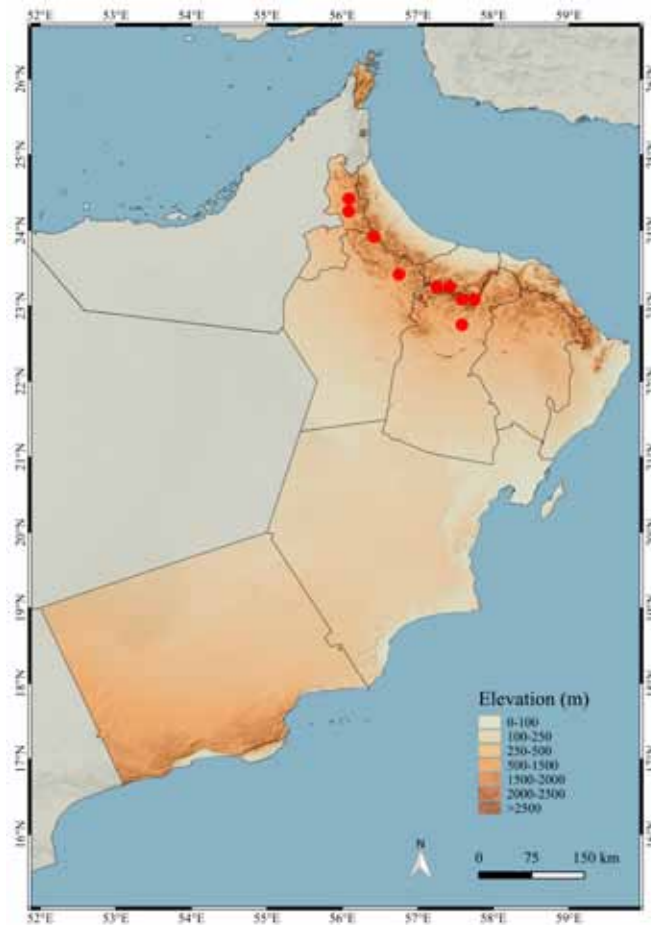

C

Useful information

|                             |     |
|-----------------------------|-----|
| IUCN Category               | LC* |
| Endemic                     | NO  |
| Venomous                    | NO  |
| Insular                     | NO  |
| Present in a protected area | NO  |

\*Not available on the web

D

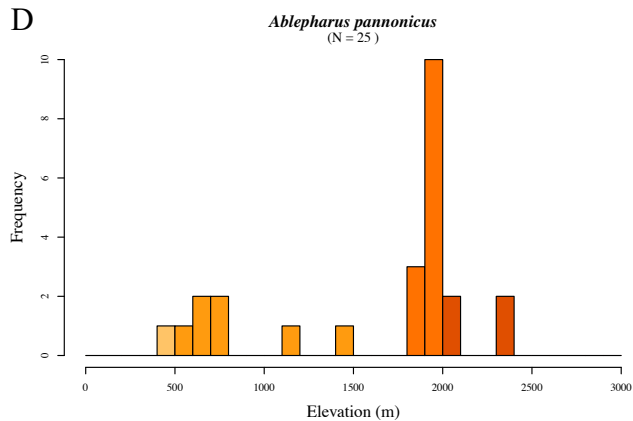

E

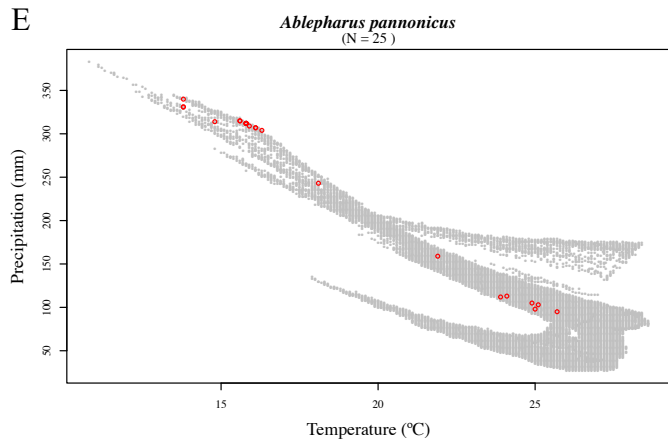

F

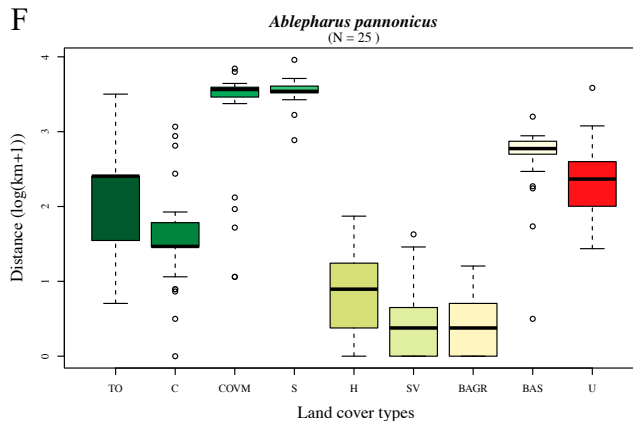

- Lizards
- Agamids
- Gekkos
- Lacertids
- Skinks
- Amphisbaenids
- Varanids
- Snakes
- Boidae
- Colubridae
- Elapidae
- Lamprophiidae
- Leptotyphlopidae
- Typhlopidae
- Viperidae



**S73: Species information**

Lizards

Skinks, Scincidae

*Chalcides ocellatus ocellatus*  
(Forskal, 1775)

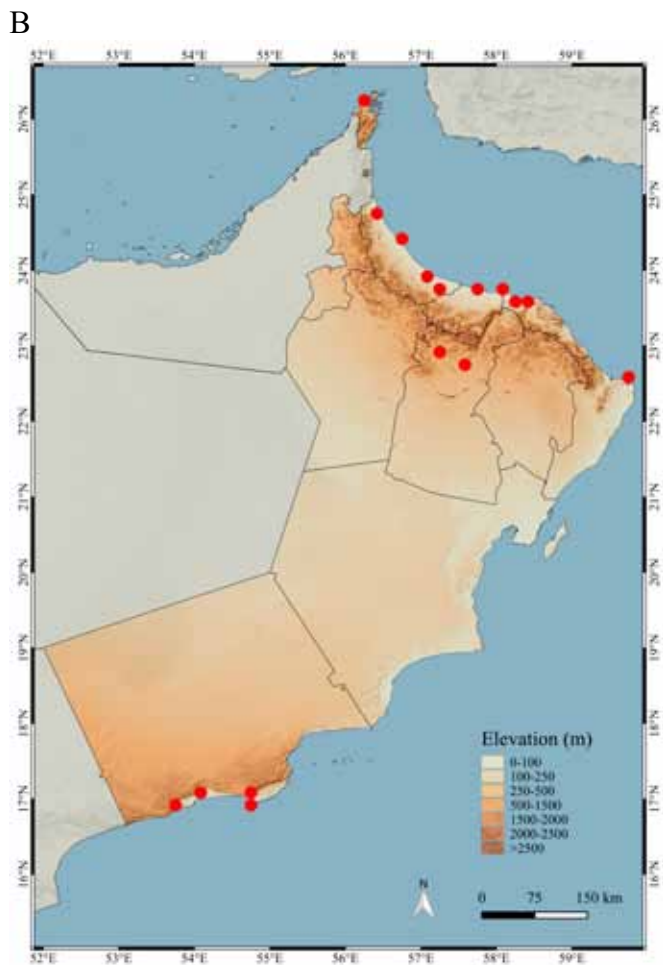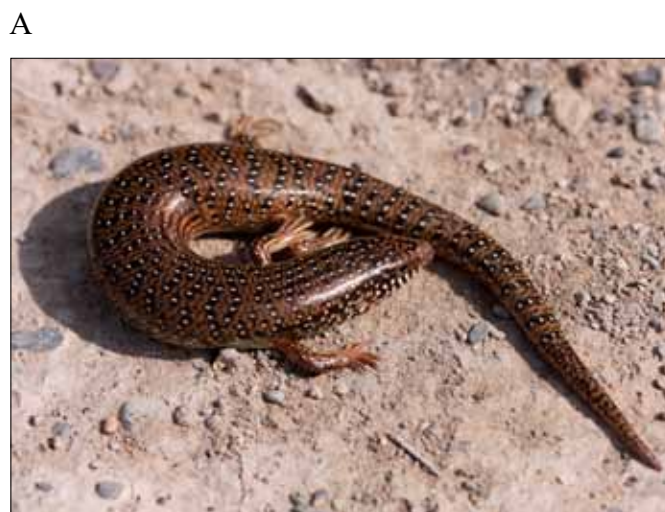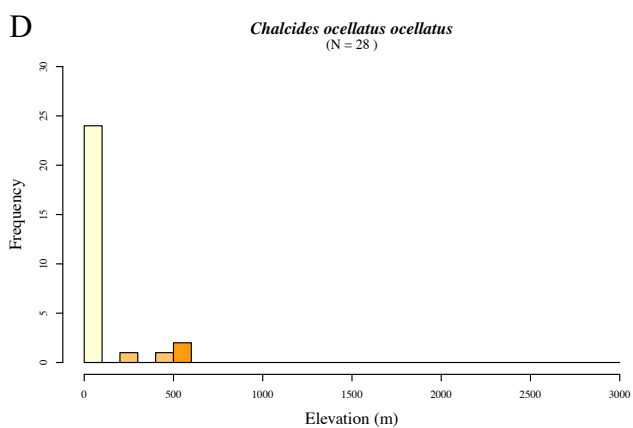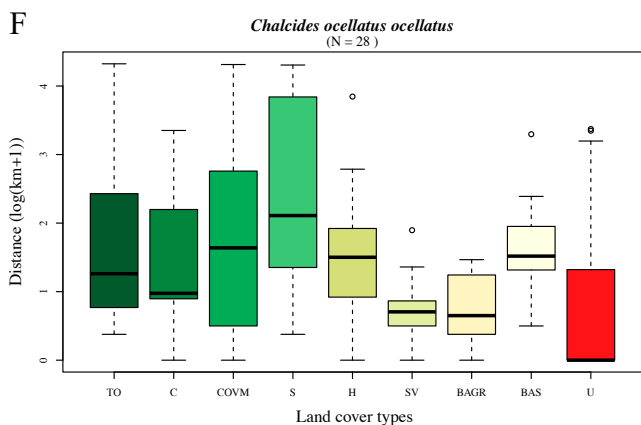

**C**

| Useful information          |     |
|-----------------------------|-----|
| IUCN Category               | LC* |
| Endemic                     | NO  |
| Venomous                    | NO  |
| Insular                     | YES |
| Present in a protected area | YES |

\*Not available on the web

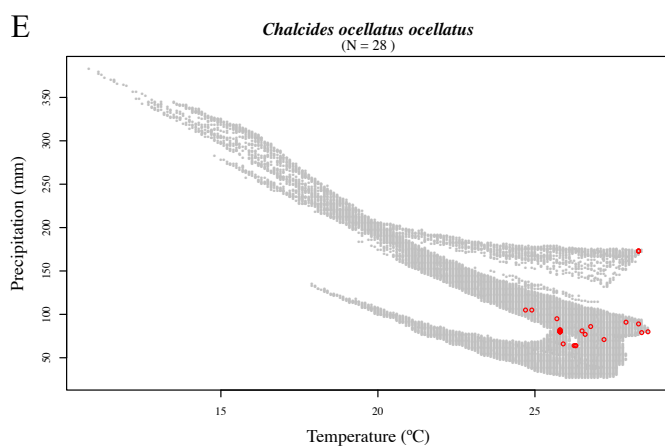

- Lizards
- Agamids
- Geckos
- Lacertids
- Skinks**
- Amphisbaenids
- Varamids
- Snakes
- Boidae
- Colubridae
- Elapidae
- Lamprophiidae
- Leptotyphlopidae
- Typhlopidae
- Viperidae

***Heremites septemtaeniatus***  
(Reuss, 1834)

**S74: Species information**

Lizards  
Skinks, Scincidae

A

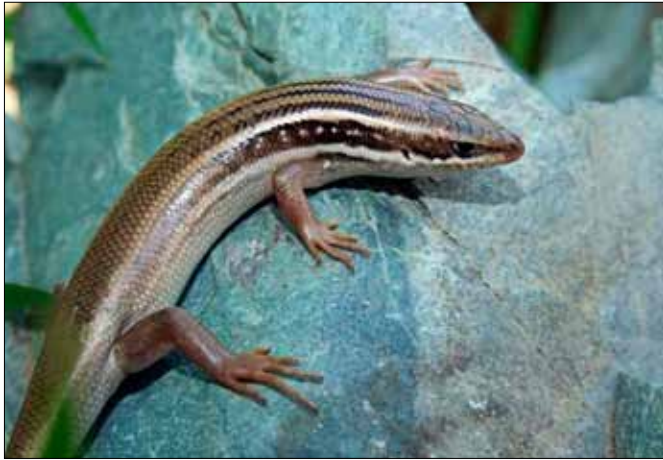

B

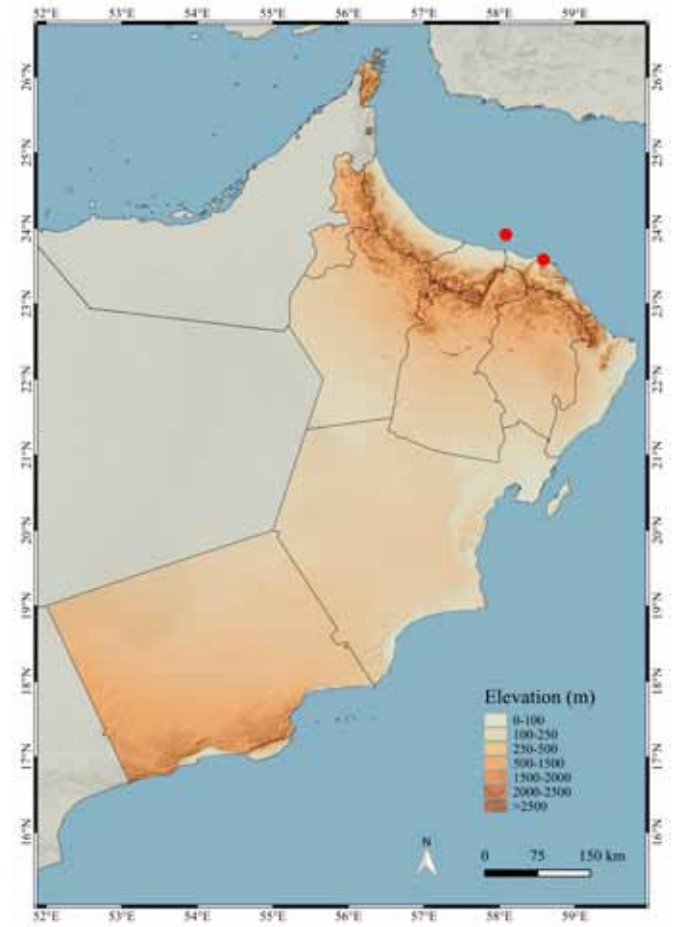

C

Useful information

|                             |     |
|-----------------------------|-----|
| IUCN Category               | LC* |
| Endemic                     | NO  |
| Venomous                    | NO  |
| Insular                     | YES |
| Present in a protected area | YES |

\*Not available on the web

D

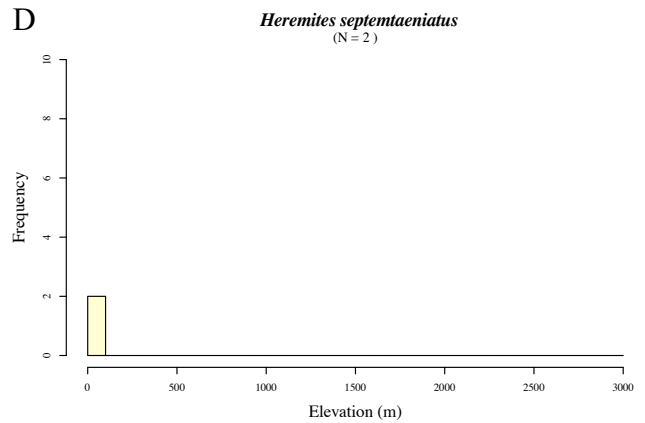

E

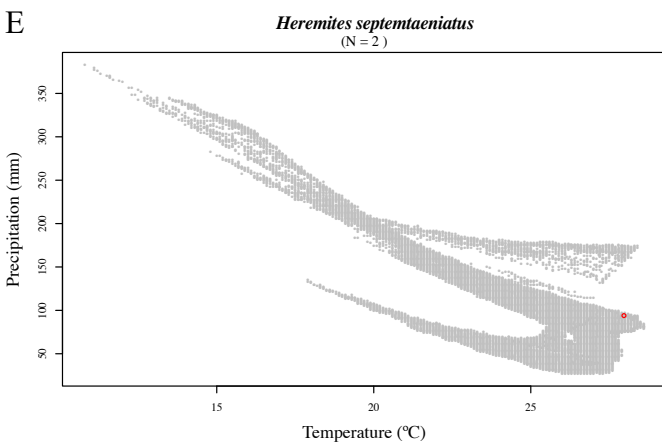

F

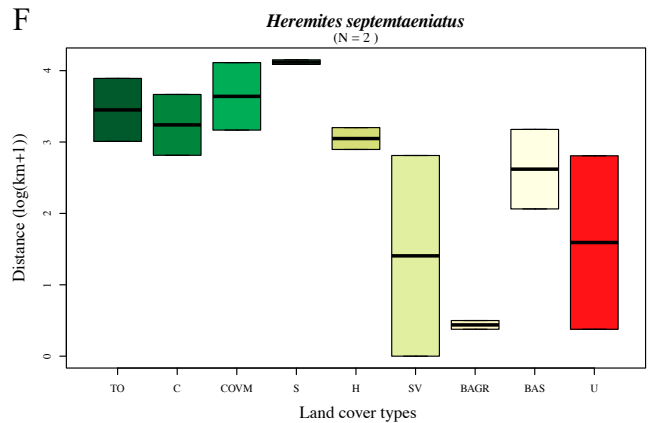

- Lizards
- Agamids
- Geckos
- Lacertids
- Skinks
- Amphisbaenids
- Varanids
- Snakes
- Boidae
- Colubridae
- Elapidae
- Lamprophiidae
- Leptotyphlopidae
- Typhlopidae
- Viperidae

**S75: Species information**

Lizards  
Skinks, Scincidae

***Scincus mitranus***  
Anderson, 1871

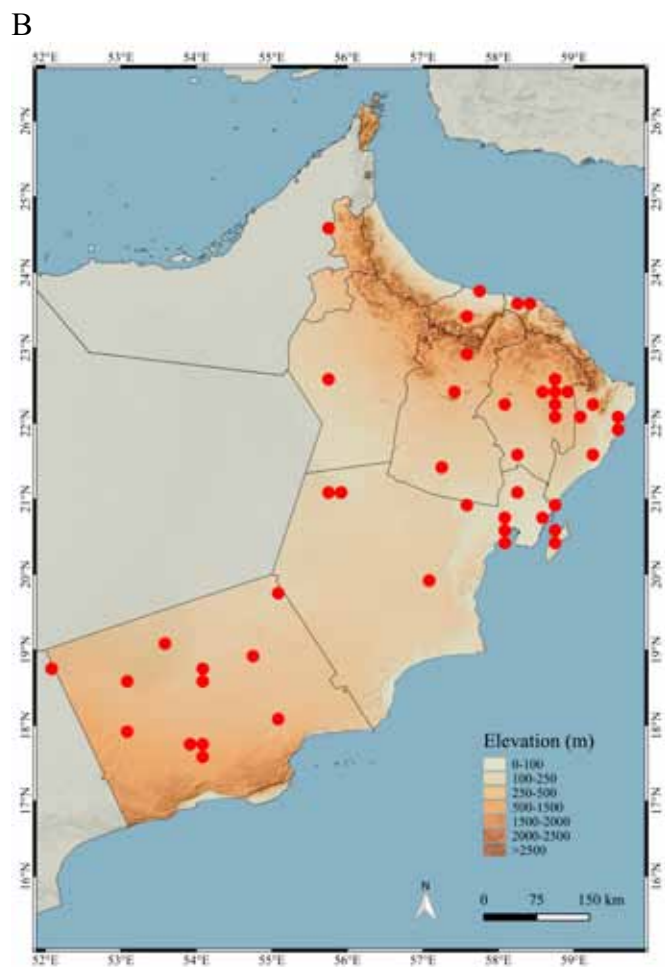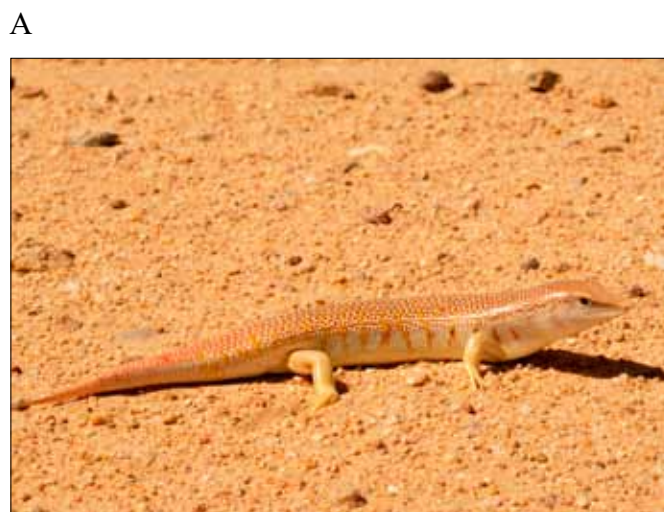

**C**

| Useful information          |     |
|-----------------------------|-----|
| IUCN Category               | LC  |
| Endemic                     | NO  |
| Venomous                    | NO  |
| Insular                     | YES |
| Present in a protected area | YES |

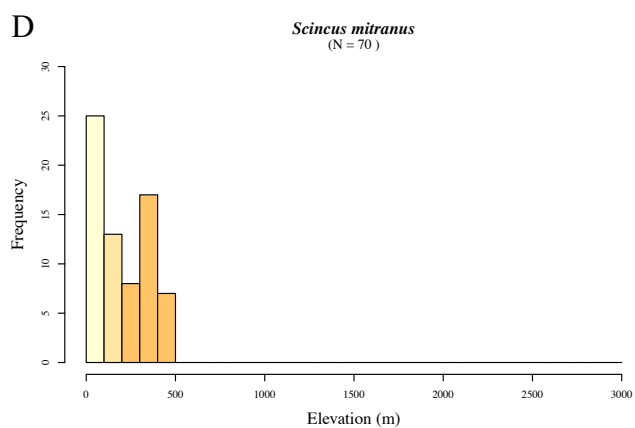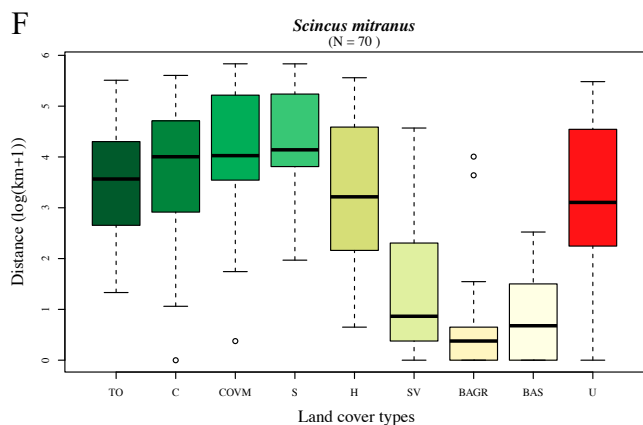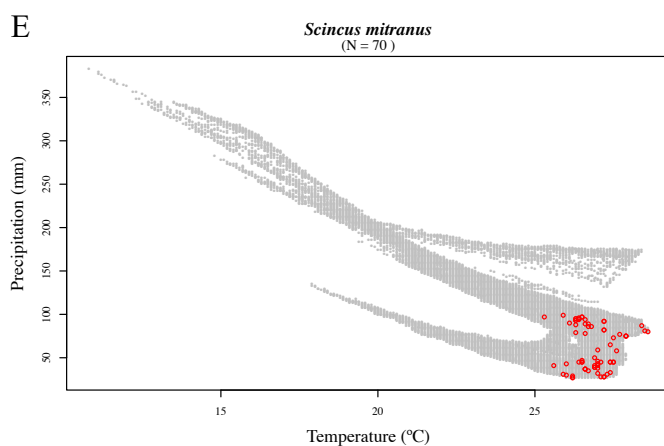

- Lizards
- Agamids
- Geckos
- Lacertids
- Skinks**
- Amphisbaenids
- Varamids
- Snakes
- Boidae
- Colubridae
- Elapidae
- Lamprophiidae
- Leptotyphlopidae
- Typhlopidae
- Viperidae

***Scincus scincus conirostris***  
**Blanford, 1881**

**S76: Species information**

Lizards  
 Skinks, Scincidae

A

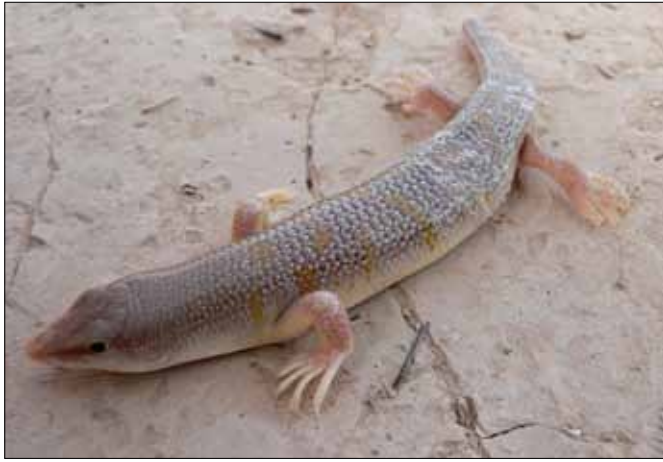

B

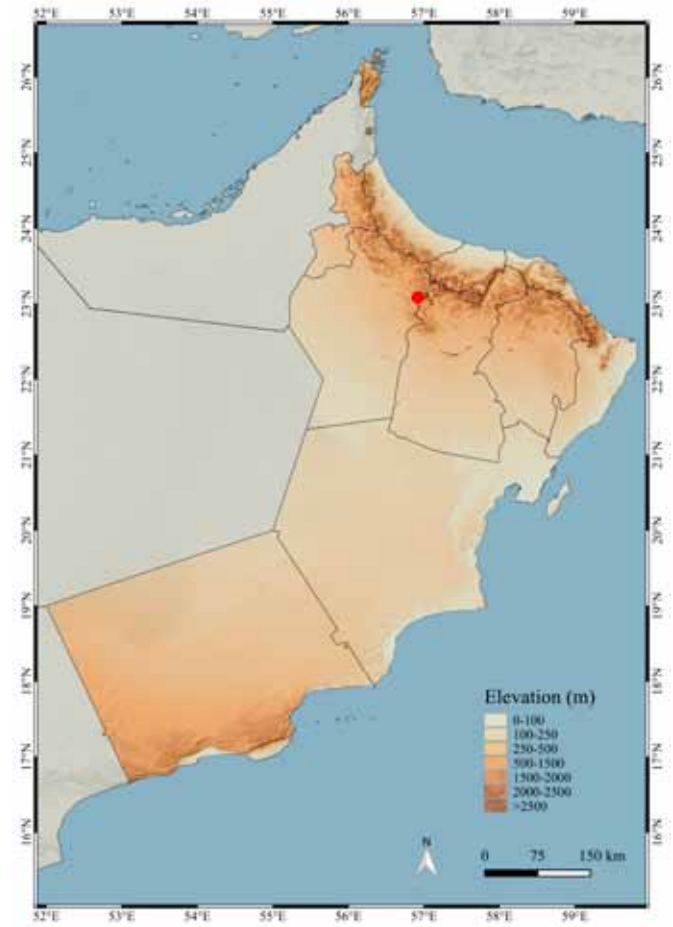

C

Useful information

|                             |     |
|-----------------------------|-----|
| IUCN Category               | LC* |
| Endemic                     | NO  |
| Venomous                    | NO  |
| Insular                     | NO  |
| Present in a protected area | NO  |

\*Not available on the web

D

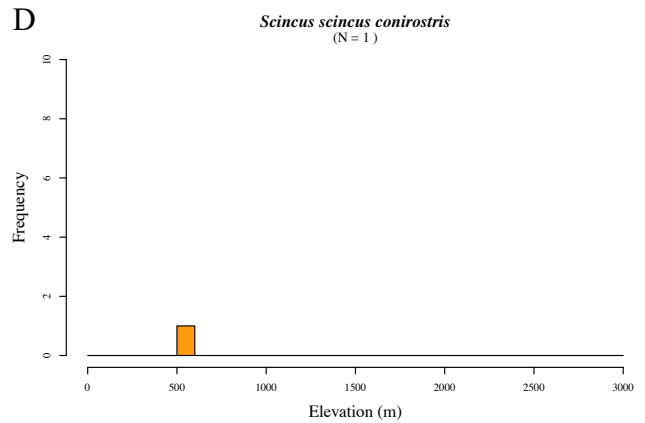

E

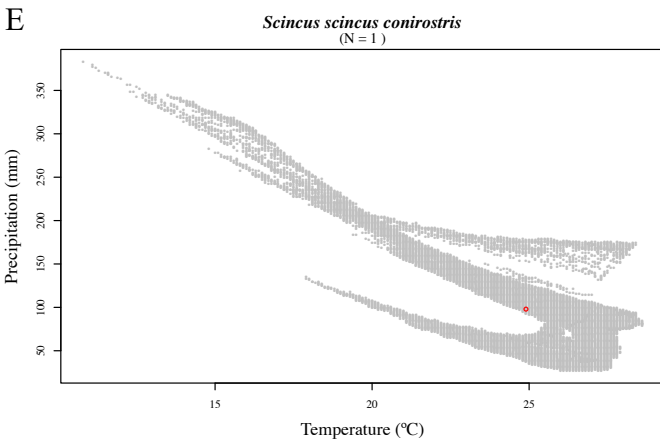

F

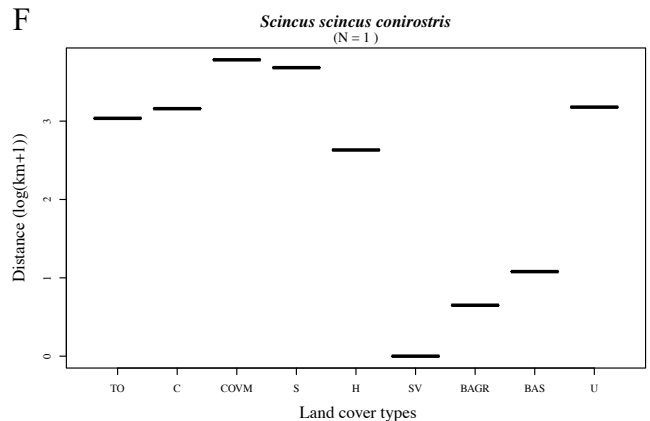

- Lizards
- Agamids
- Gekcos
- Lacertids
- Skinks
- Amphisbaenids
- Varanids
- Snakes
- Boidae
- Colubridae
- Elapidae
- Lamprophiidae
- Leptotyphlopidae
- Typhlopidae
- Viperidae

**S77: Species information**

Lizards  
Skins, Scincidae

*Trachylepis brevicollis*  
(Wiegmann, 1837)

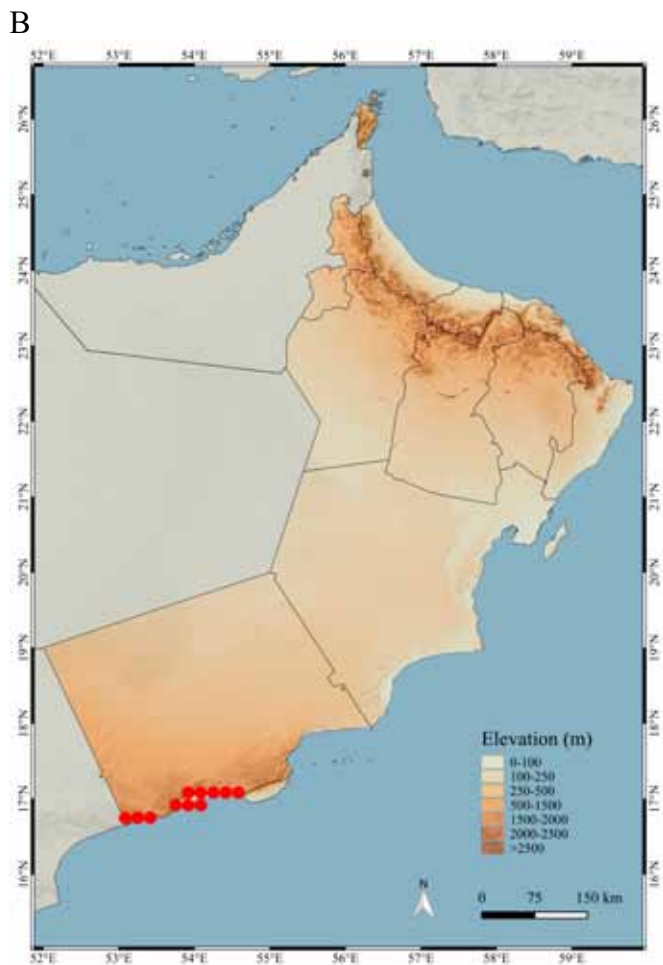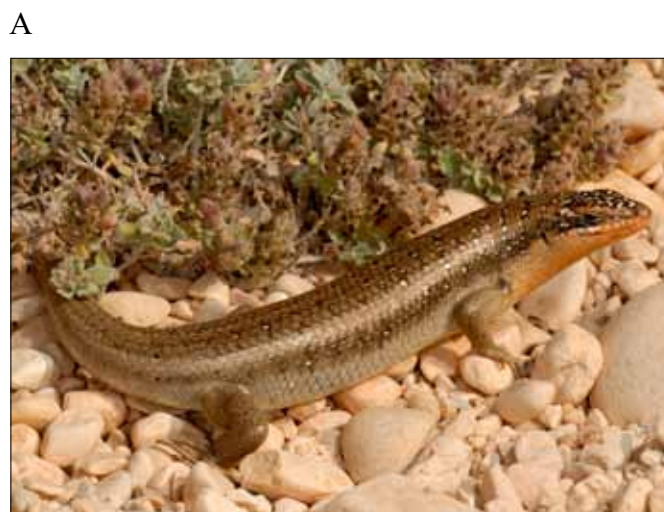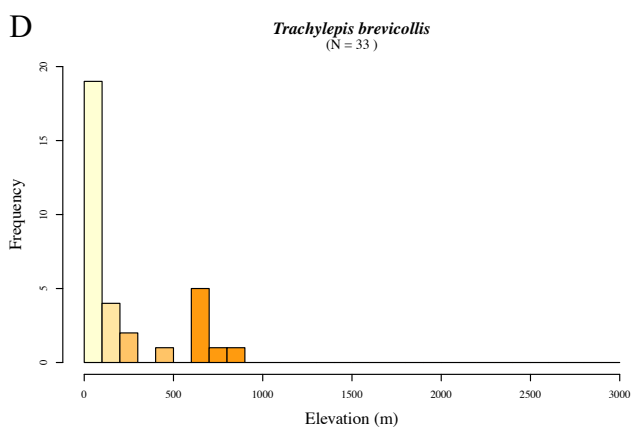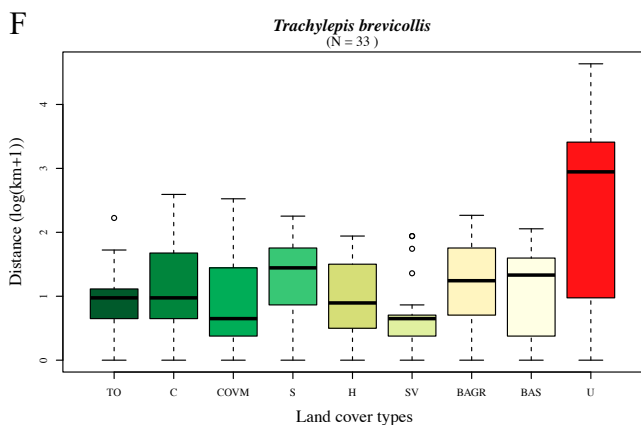

**C**

Useful information

|                             |     |
|-----------------------------|-----|
| IUCN Category               | LC* |
| Endemic                     | NO  |
| Venomous                    | NO  |
| Insular                     | NO  |
| Present in a protected area | NO  |

\*Not available on the web

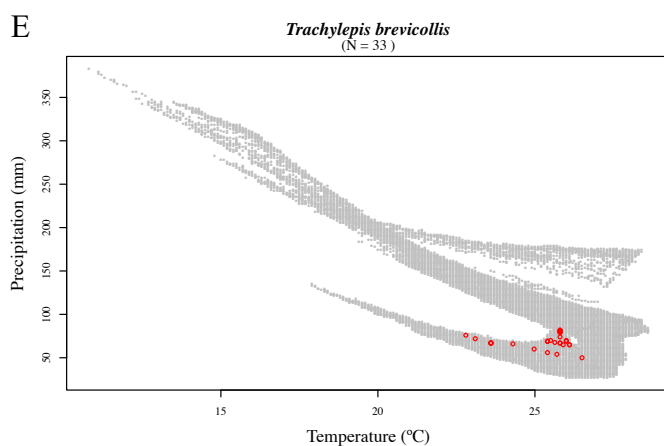

- Lizards
- Agamids
- Geckos
- Lacertids
- Skins**
- Amphisbaenids
- Varamids
- Snakes
- Boidae
- Colubridae
- Elapidae
- Lamprophiidae
- Leptotyphlopidae
- Typhlopidae
- Viperidae

***Trachylepis tessellata***  
(Anderson, 1895)

**S78: Species information**

Lizards  
Skins, Scincidae

A

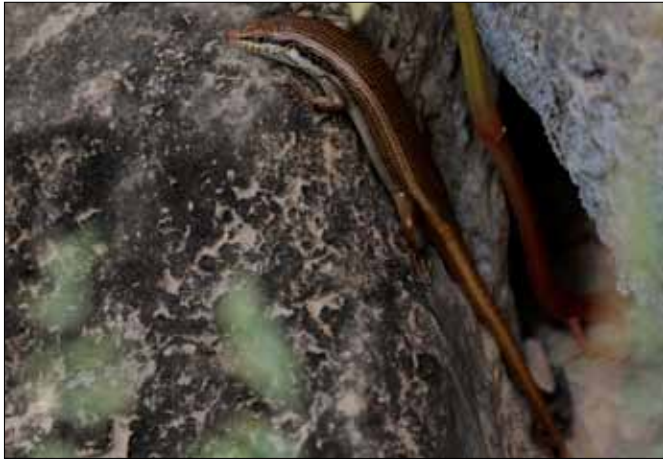

B

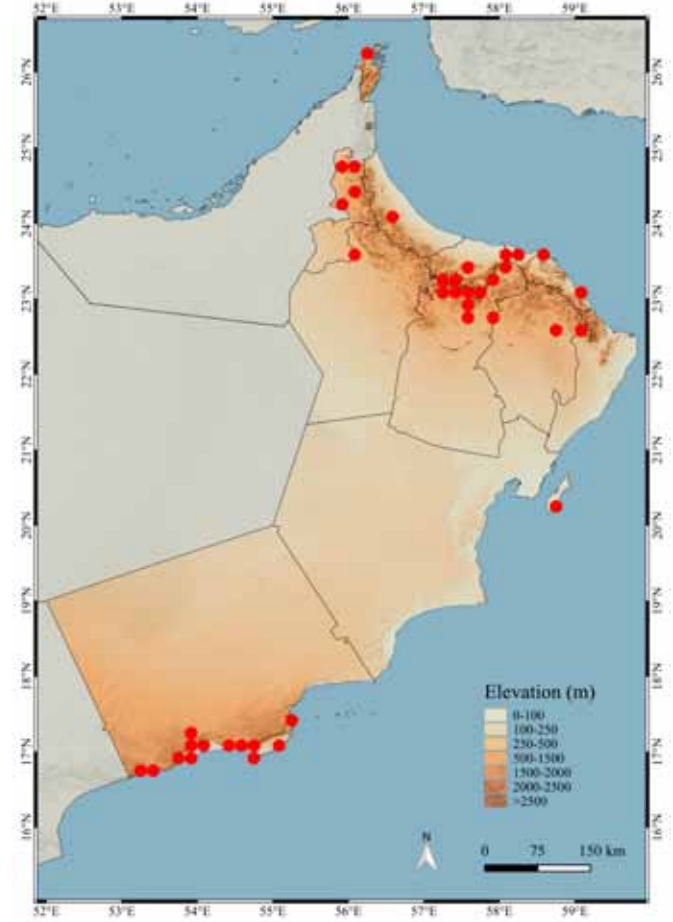

C

Useful information

|                             |     |
|-----------------------------|-----|
| IUCN Category               | LC  |
| Endemic                     | NO  |
| Venomous                    | NO  |
| Insular                     | YES |
| Present in a protected area | YES |

D

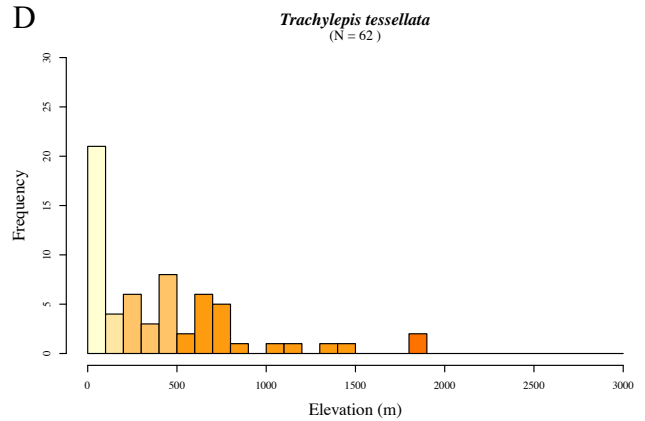

E

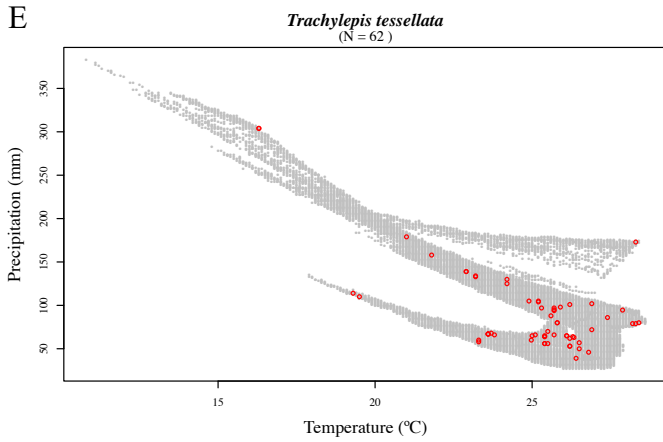

F

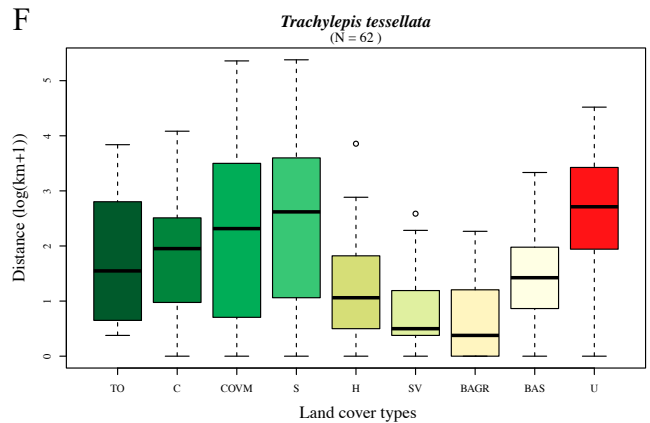

- Lizards
- Agamids
- Geckos
- Lacertids
- Skins
- Amphisbaenids
- Varanids
- Snakes
- Boidae
- Colubridae
- Elapidae
- Lamprophiidae
- Leptotyphlopidae
- Typhlopidae
- Viperidae

**S79: Species information**

Lizards

Amphisbaenids, Trogonophidae

***Diplometopon zarudnyi***  
Nikolsky, 1907

**B**

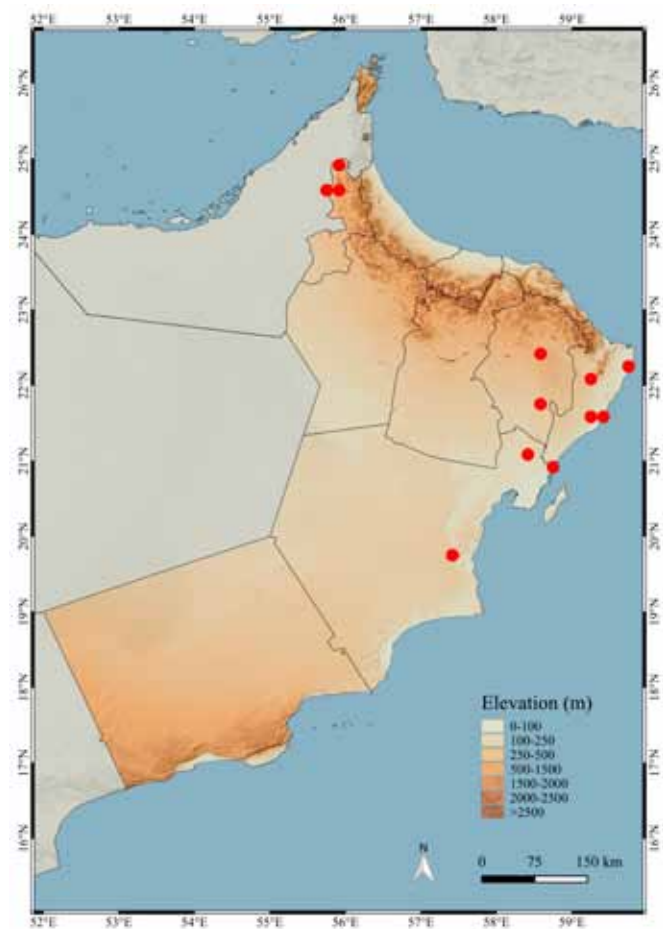

**A**

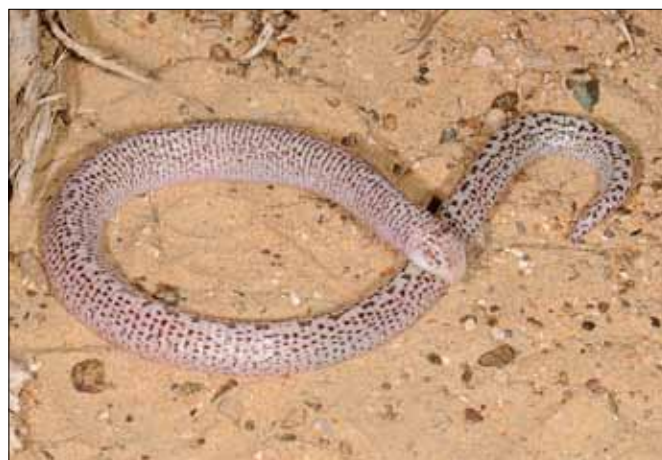

**C**

Useful information

|                             |     |
|-----------------------------|-----|
| IUCN Category               | LC  |
| Endemic                     | NO  |
| Venomous                    | NO  |
| Insular                     | NO  |
| Present in a protected area | YES |

**D**

*Diplometopon zarudnyi*  
(N = 13)

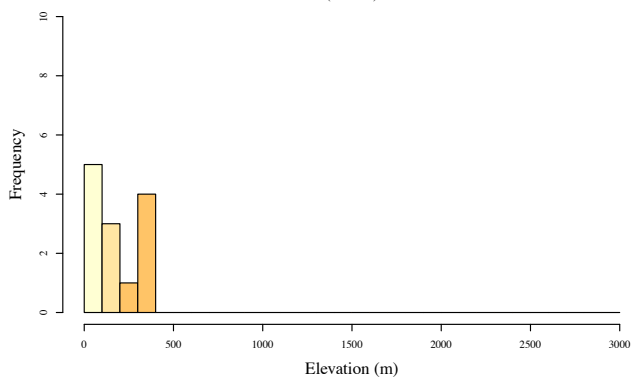

**F**

*Diplometopon zarudnyi*  
(N = 13)

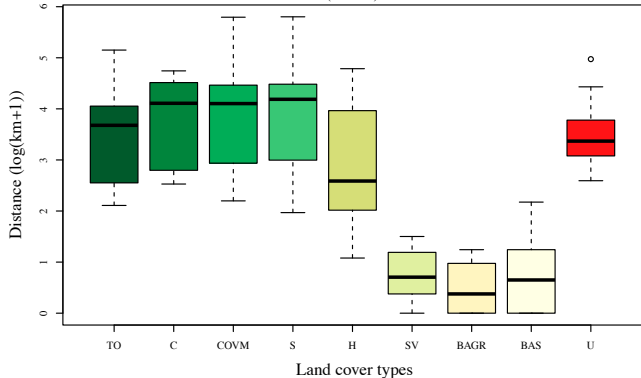

**E**

*Diplometopon zarudnyi*  
(N = 13)

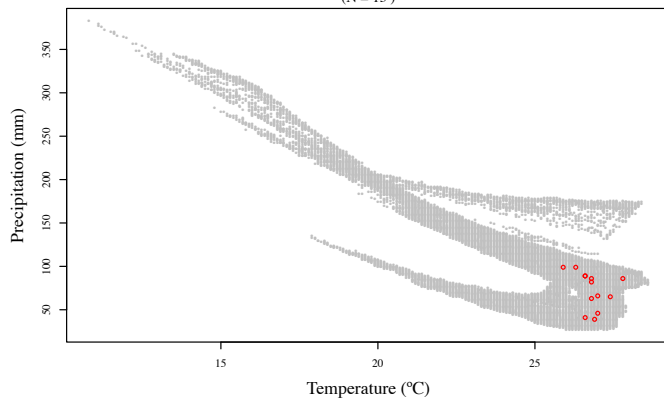

Lizards

Agamids

Geckos

Lacertids

Skinks

Amphisbaenids

Varamids

Snakes

Boidae

Colubridae

Elapidae

Lamprophiidae

Leptotyphlopidae

Typhlopidae

Viperidae

***Varanus griseus***  
(Daudin, 1803)

**S80: Species information**

Lizards  
Varanids, Varanidae

A

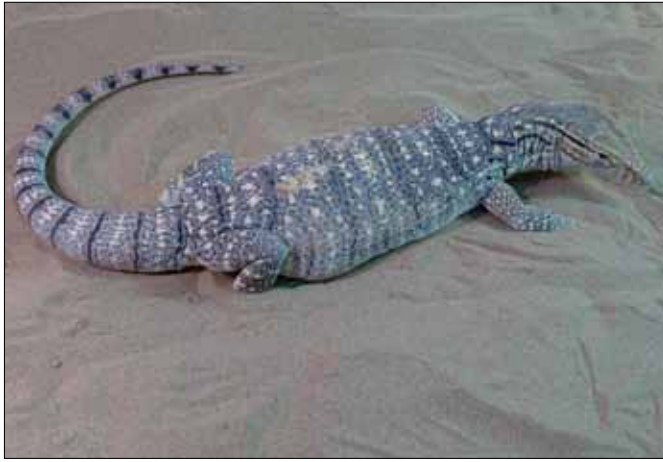

B

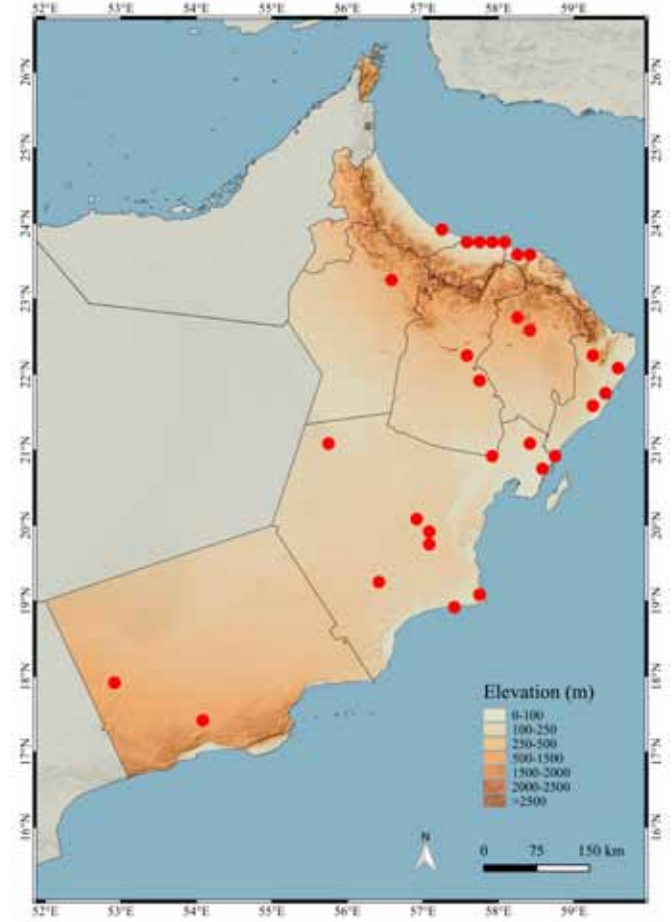

C

Useful information

|                             |     |
|-----------------------------|-----|
| IUCN Category               | LC* |
| Endemic                     | NO  |
| Venomous                    | NO  |
| Insular                     | NO  |
| Present in a protected area | YES |

\*Not available on the web

D

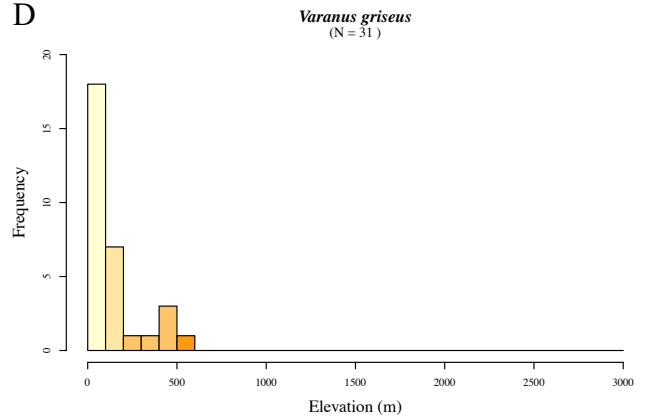

E

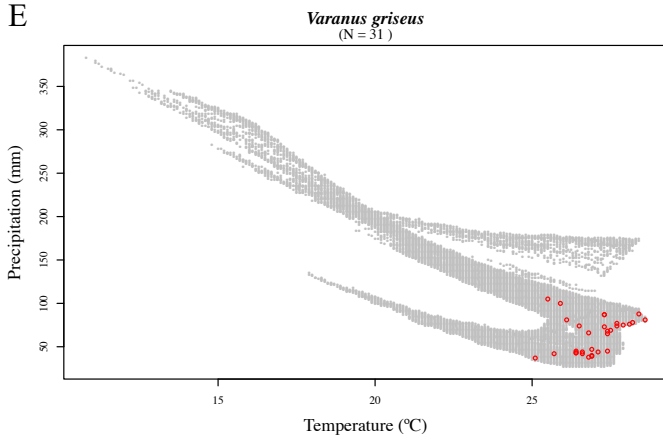

F

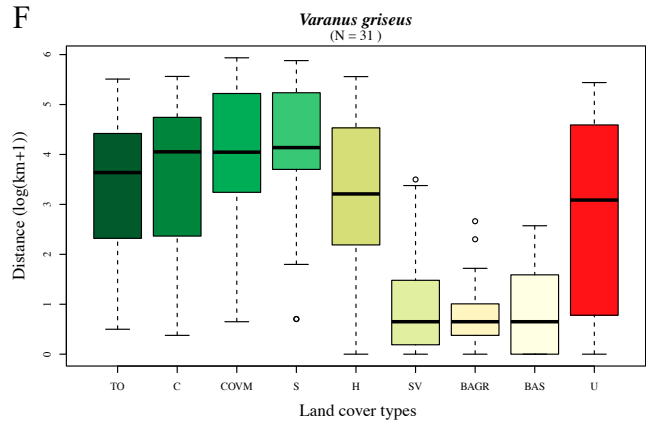

- Lizards
- Agamids
- Geckos
- Lacertids
- Skinks
- Amphisbaenids
- Varanids**
- Snakes
- Boidae
- Colubridae
- Elapidae
- Lamprophiidae
- Leptotyphlopidae
- Typhlopidae
- Viperidae



**S81: Species information**

Snakes  
Boidae

*Eryx jayakari*  
Boulenger, 1888

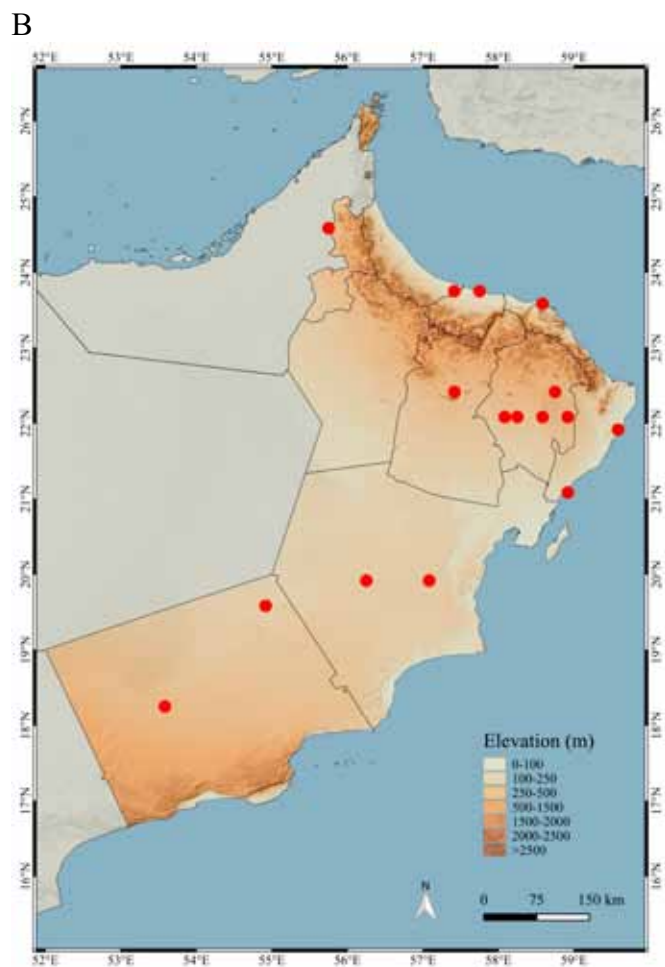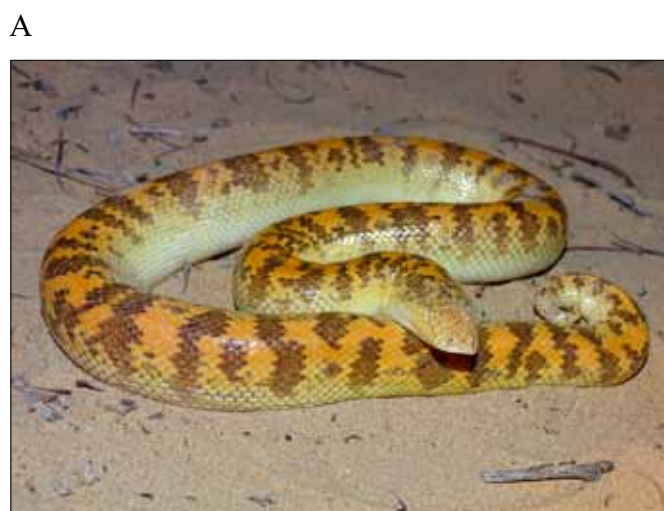

**C**

| Useful information          |     |
|-----------------------------|-----|
| IUCN Category               | LC  |
| Endemic                     | NO  |
| Venomous                    | NO  |
| Insular                     | NO  |
| Present in a protected area | YES |

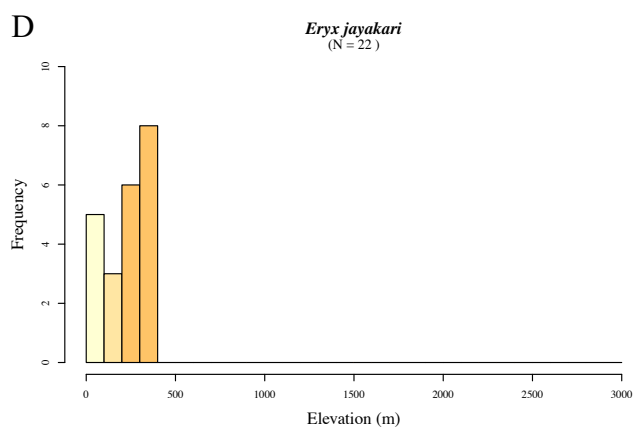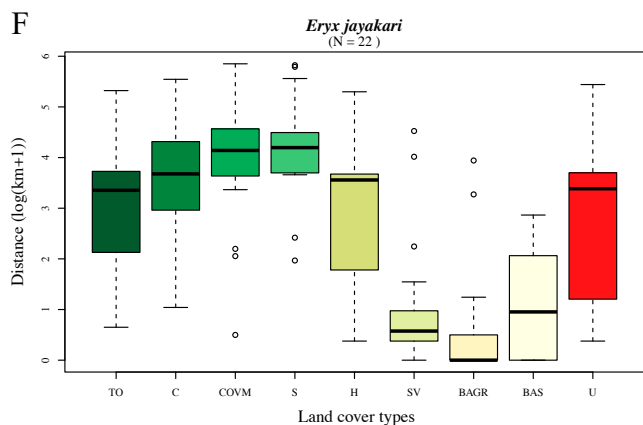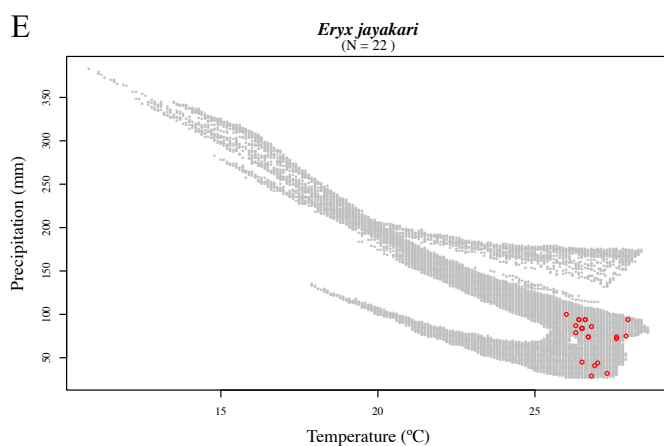

- Lizards
- Agamids
- Geckos
- Lacertids
- Skinks
- Amphisbaenids
- Varamids
- Snakes
- Boidae
- Colubridae
- Elapidae
- Lamprophiidae
- Leptotyphlopidae
- Typhlopidae
- Viperidae

***Lytorhynchus diadema diadema***  
(Duméril, Bibron & Duméril, 1854)

**S82: Species information**

Snakes  
Colubridae

A

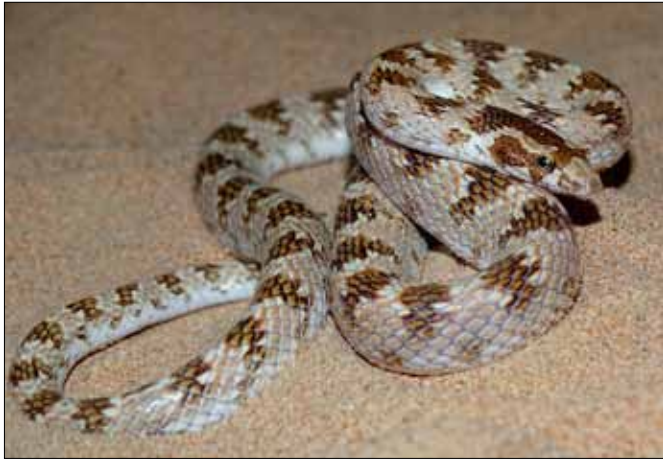

B

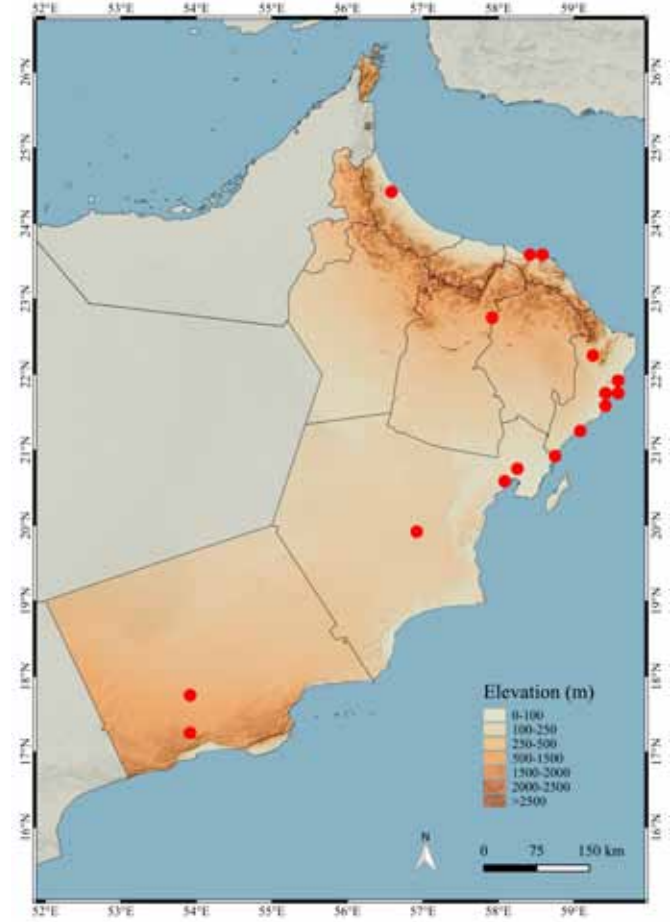

C

Useful information

|                             |     |
|-----------------------------|-----|
| IUCN Category               | LC  |
| Endemic                     | NO  |
| Venomous                    | NO  |
| Insular                     | NO  |
| Present in a protected area | YES |

D

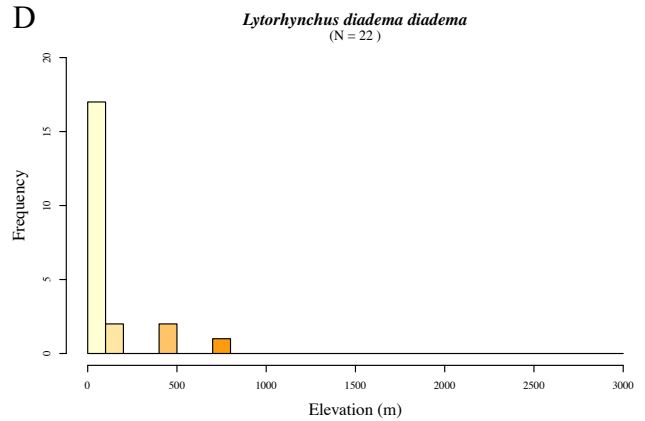

E

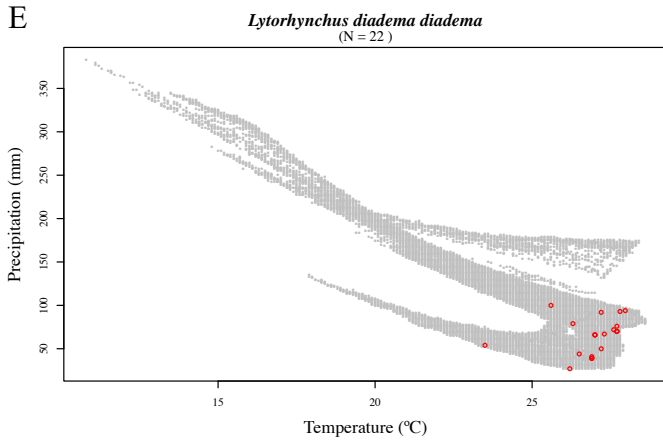

F

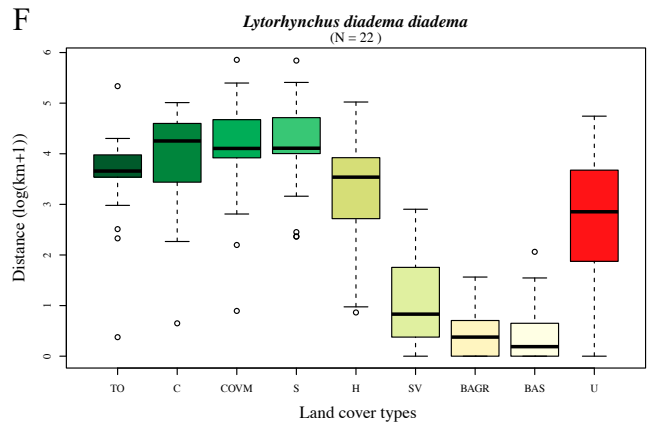

- Lizards
- Agamids
- Geckos
- Lacertids
- Skinks
- Ampeliscaenids
- Varanids
- Snakes**
- Boiidae
- Colubridae**
- Elapidae
- Lamprophiidae
- Leptotyphlopidae
- Typhlopidae
- Viperidae

**S83: Species information**

Snakes  
Colubridae

*Platyceps rhodorachis rhodorachis*  
(Jan, 1865)

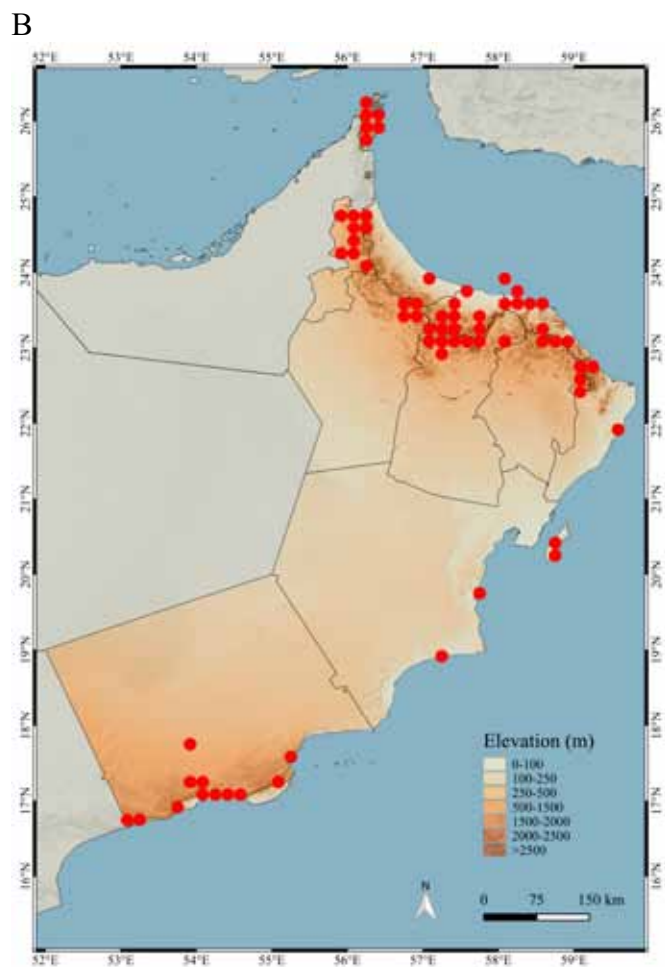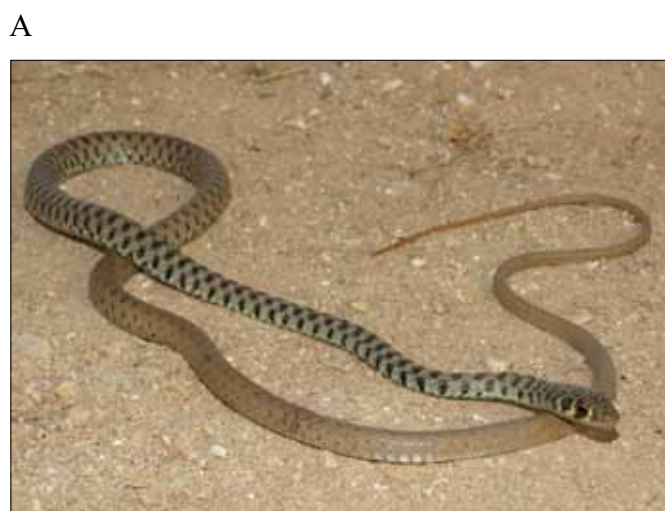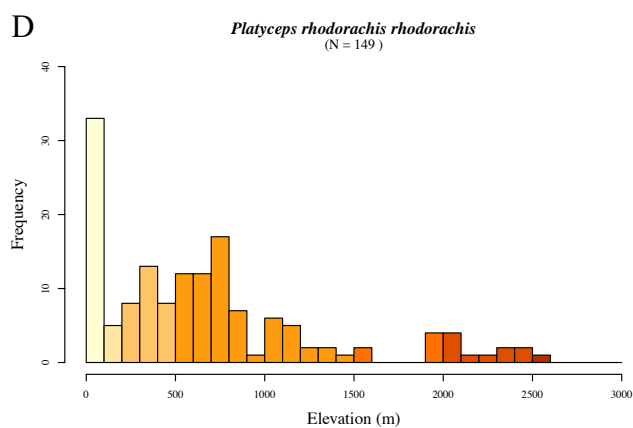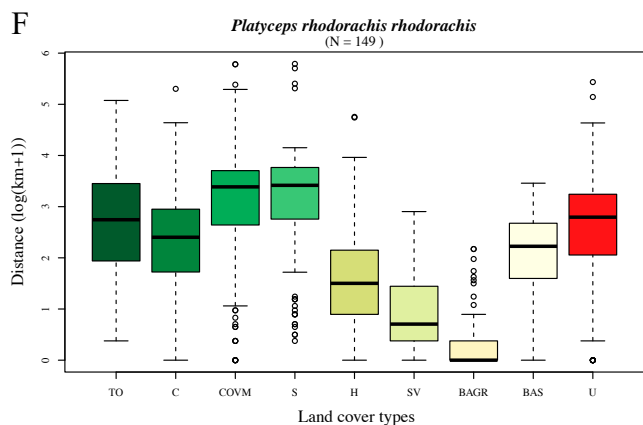

**C**

Useful information

|                             |     |
|-----------------------------|-----|
| IUCN Category               | LC* |
| Endemic                     | NO  |
| Venomous                    | NO  |
| Insular                     | YES |
| Present in a protected area | YES |

\*Not available on the web

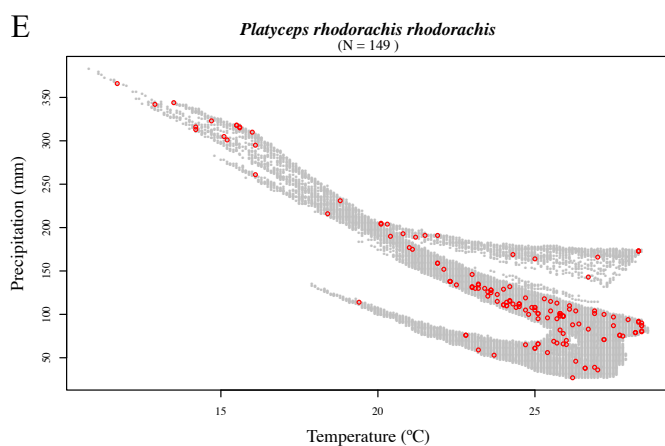

- Lizards
- Agamids
- Geckos
- Lacertids
- Skinks
- Amphisbaenids
- Varamids
- Snakes
- Boidae
- Colubridae
- Elapidae
- Lamprophiidae
- Leptotyphlopidae
- Typhlopidae
- Viperidae

***Platyceps thomasi***  
(Parker, 1931)

**S84: Species information**  
Snakes  
Colubridae

A

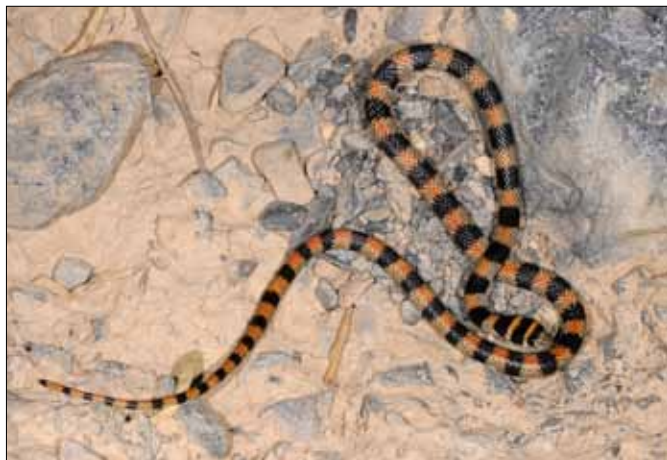

B

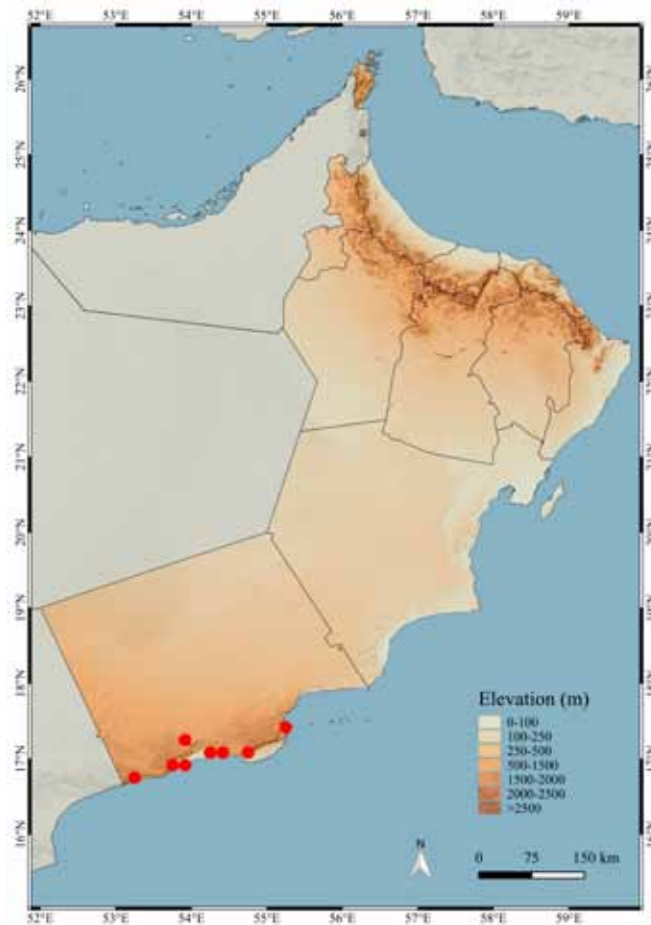

C

Useful information

|                             |     |
|-----------------------------|-----|
| IUCN Category               | DD  |
| Endemic                     | NO  |
| Venomous                    | NO  |
| Insular                     | NO  |
| Present in a protected area | YES |

D

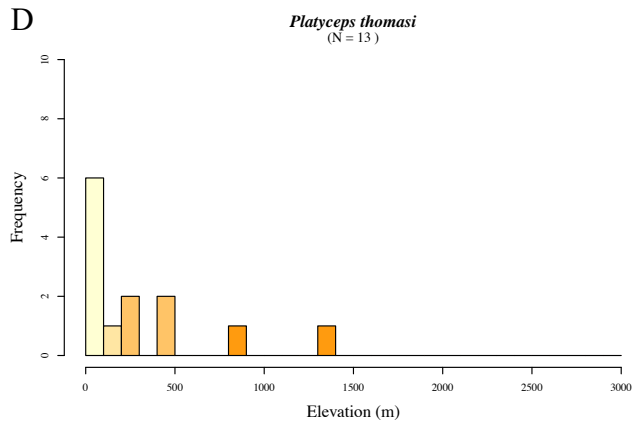

E

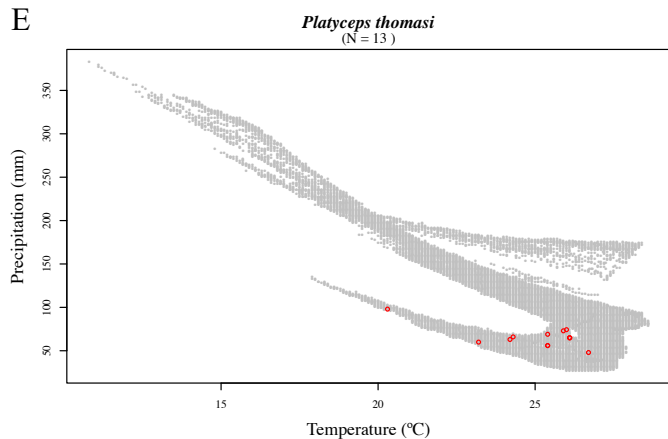

F

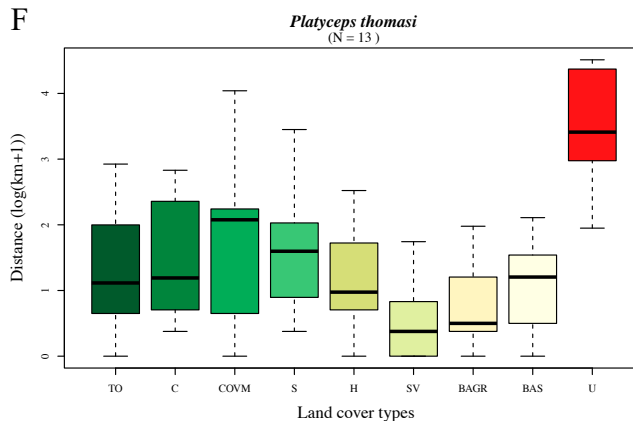

- Lizards
- Agamids
- Geckos
- Lacertids
- Skinks
- Amphisbaenids
- Varanids
- Snakes**
- Boidae
- Colubridae**
- Elapidae
- Lamprophiidae
- Leptotyphlopidae
- Typhlopidae
- Viperidae

**S85: Species information**

Snakes  
Colubridae

*Rhynchocalamus arabicus*  
Schmidt, 1933

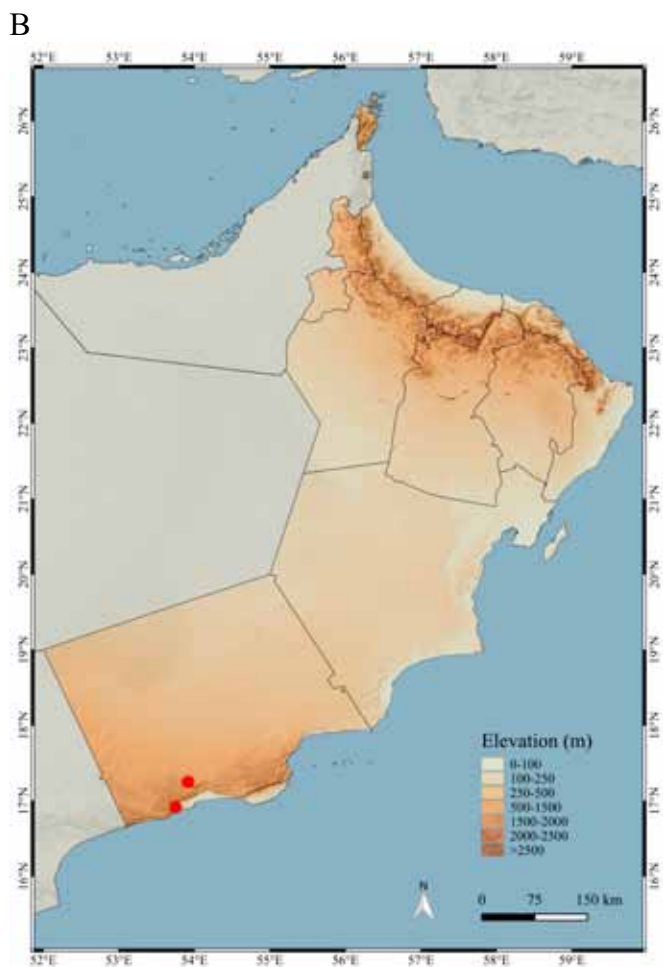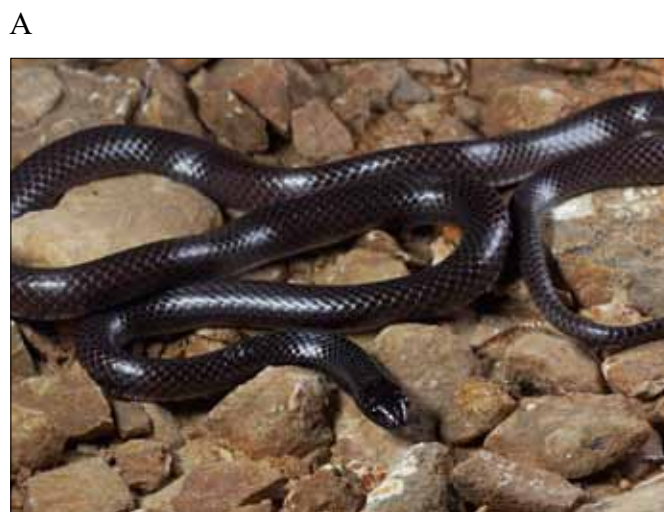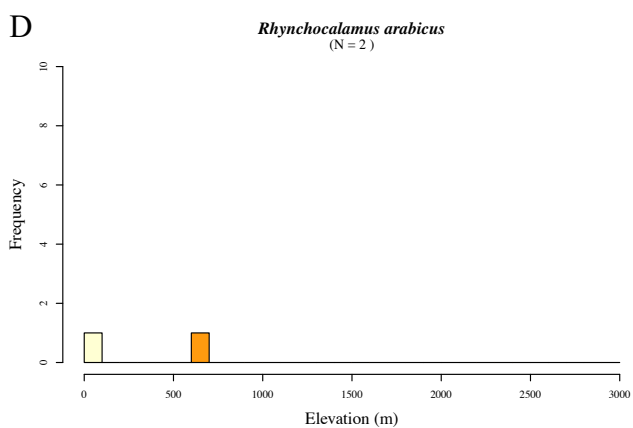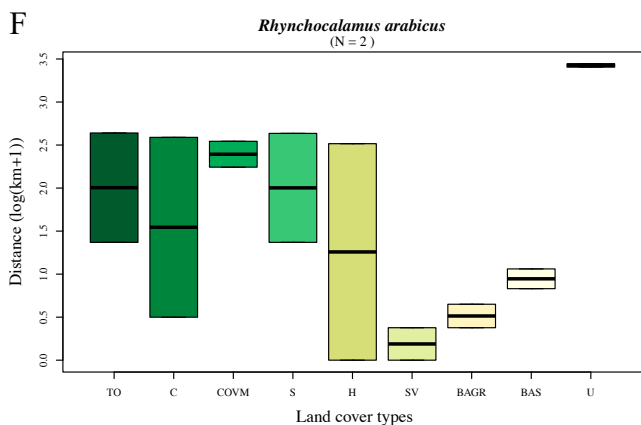

**C**

Useful information

|                             |    |
|-----------------------------|----|
| IUCN Category               | DD |
| Endemic                     | NO |
| Venomous                    | NO |
| Insular                     | NO |
| Present in a protected area | NO |

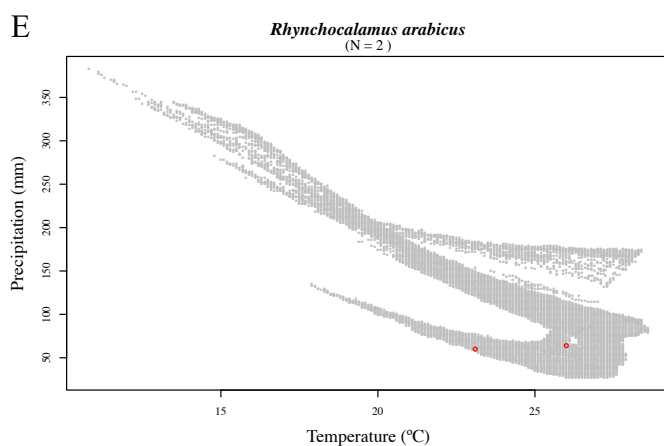

Lizards  
Agamids  
Geckos  
Lacertids  
Skinks  
Amphisbaenids  
Varanids  
Snakes  
Boidae  
Colubridae  
Elapidae  
Lamprophiidae  
Leptotyphlopidae  
Typhlopidae  
Viperidae

*Spalerosophis diadema cliffordii*  
(Schlegel, 1837)

S86: Species information

Snakes  
Colubridae

A

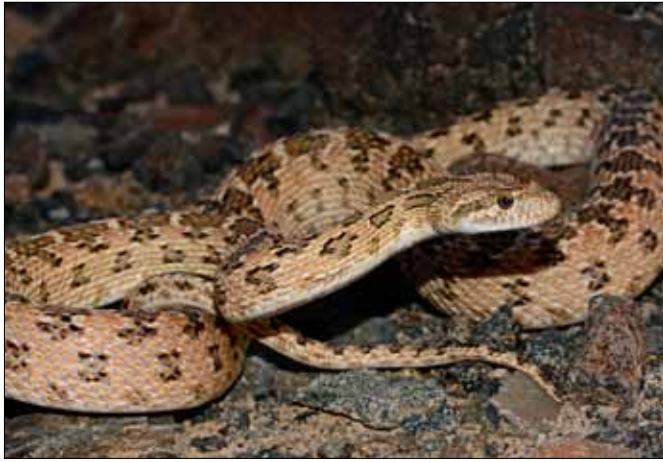

B

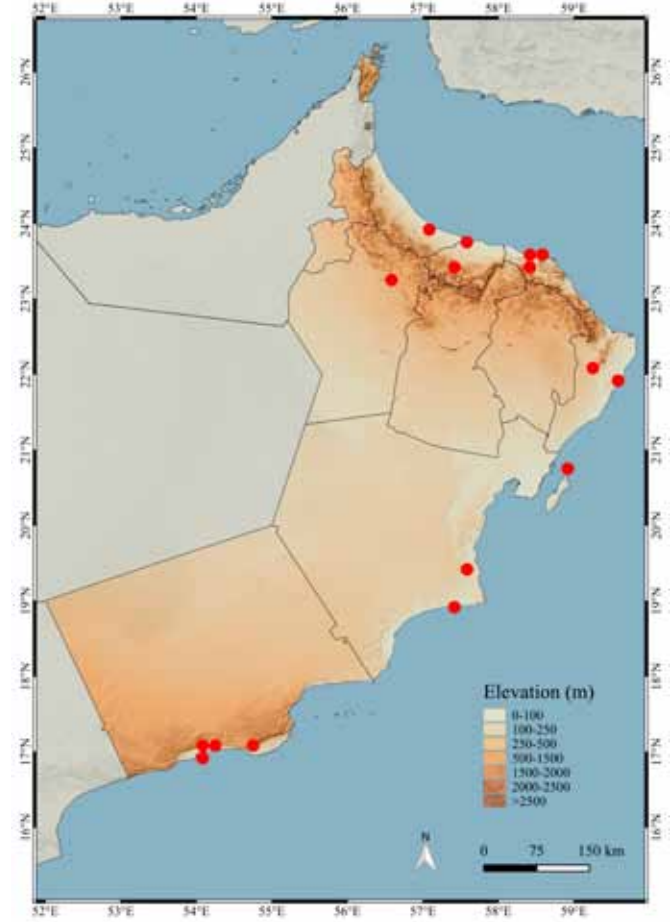

C

Useful information

|                             |     |
|-----------------------------|-----|
| IUCN Category               | LC* |
| Endemic                     | NO  |
| Venomous                    | NO  |
| Insular                     | YES |
| Present in a protected area | YES |

\*Not available on the web

D

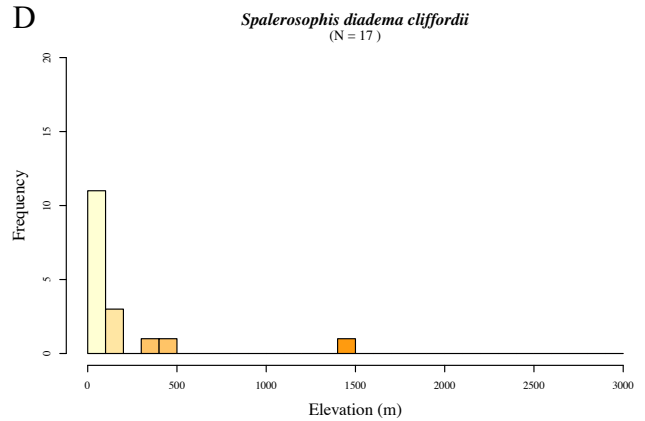

E

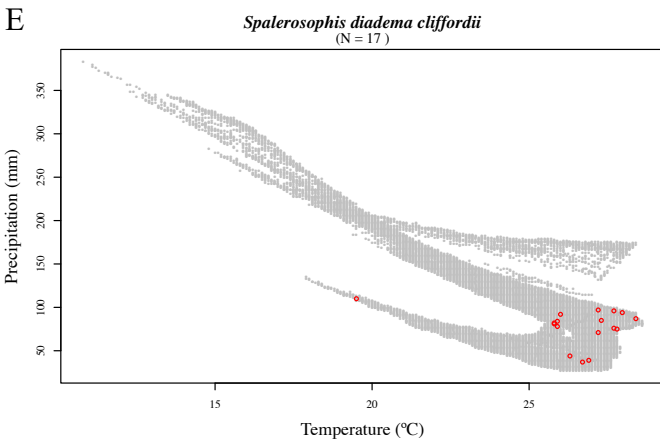

F

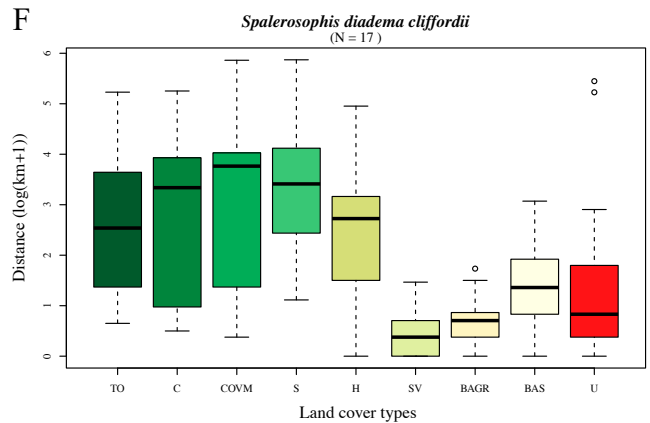

- Lizards
- Agamids
- Geckos
- Lacertids
- Skinks
- Amphisbaenids
- Varanids
- Snakes**
- Boiidae
- Colubridae**
- Elapidae
- Lamprophiidae
- Leptotyphlopidae
- Typhlopidae
- Viperidae

**S87: Species information**

Snakes  
Colubridae

*Telescopus dhara dhara*  
(Forskal, 1775)

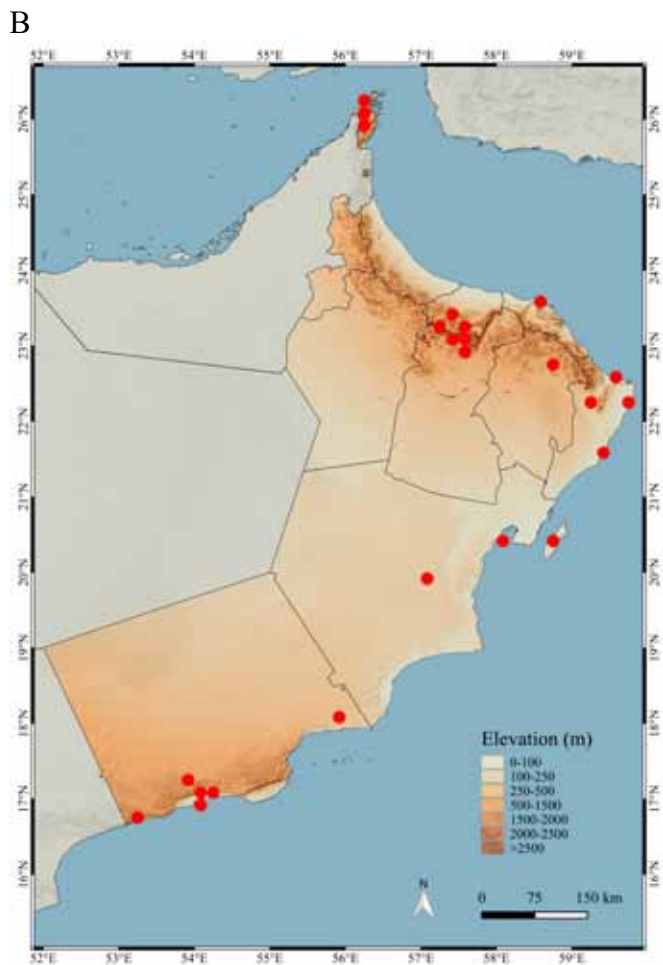

**A**

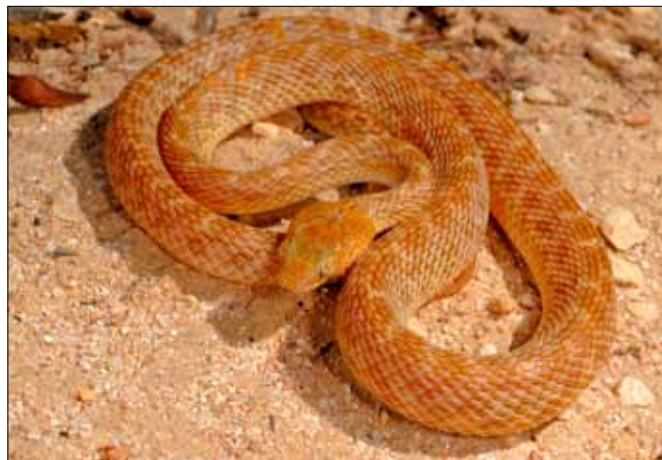

**C**

Useful information

|                             |     |
|-----------------------------|-----|
| IUCN Category               | LC* |
| Endemic                     | NO  |
| Venomous                    | NO  |
| Insular                     | YES |
| Present in a protected area | YES |

\*Not available on the web

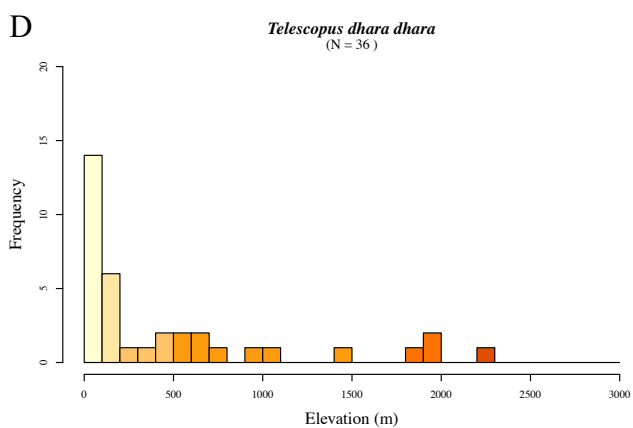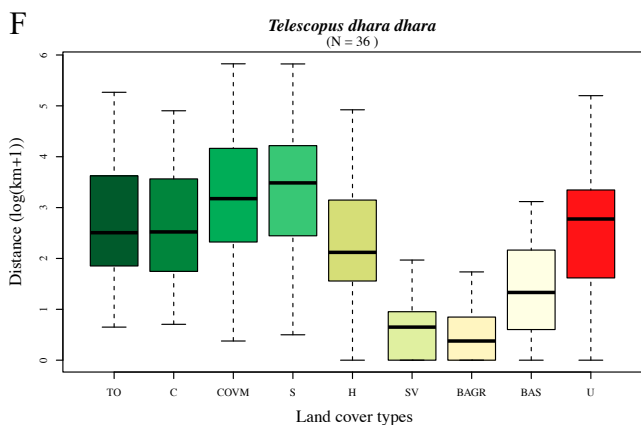

**E**

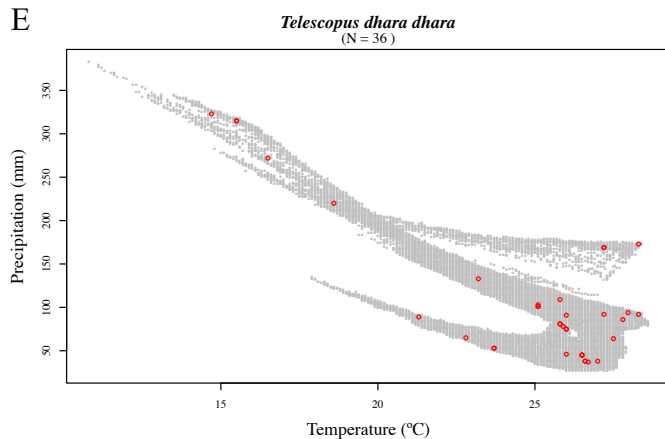

- Lizards
- Agamids
- Geckos
- Lacertids
- Skinks
- Amphisbaenids
- Varamids
- Snakes
- Boidae
- Colubridae
- Elapidae
- Lamprophiidae
- Leptotyphlopidae
- Typhlopidae
- Viperidae

***Naja arabica***  
**Scortecci, 1932**

**S88: Species information**

Snakes  
 Elapidae

A

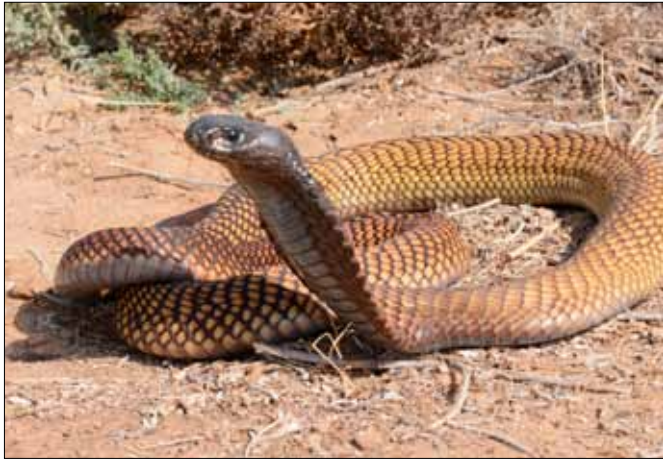

B

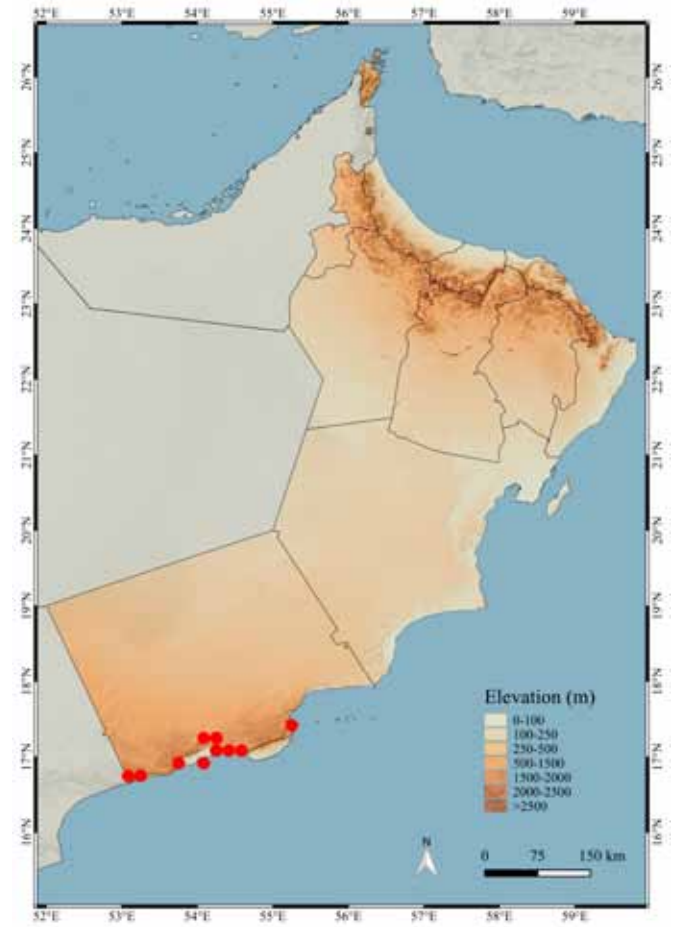

C

Useful information

|                             |     |
|-----------------------------|-----|
| IUCN Category               | LC  |
| Endemic                     | NO  |
| Venomous                    | YES |
| Insular                     | NO  |
| Present in a protected area | YES |

D

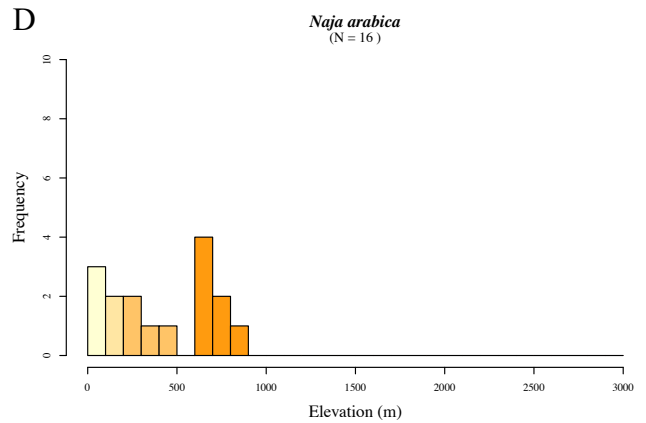

E

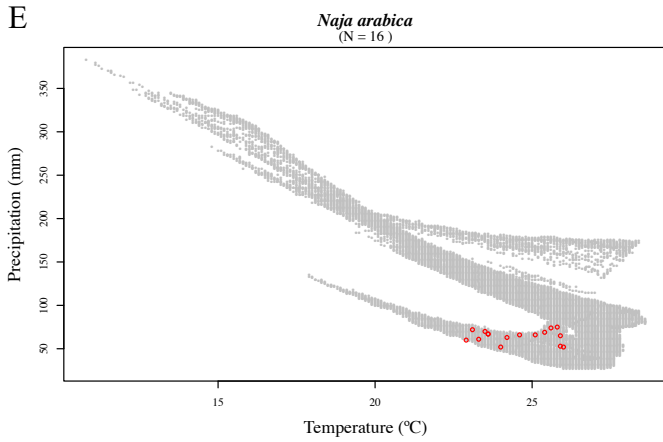

F

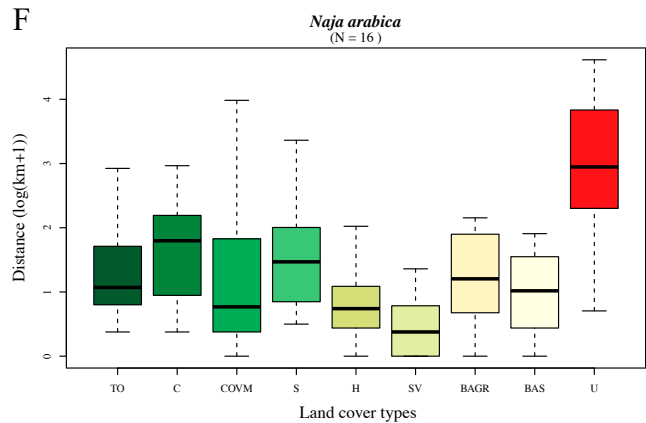

- Lizards
- Agamids
- Gekcos
- Lacertids
- Skinks
- Amphisbaenids
- Varanids
- Snakes**
- Boidae
- Colebridae
- Elapidae**
- Lamprophiidae
- Leptotyphlopidae
- Typhlopidae
- Viperidae



**S89: Species information**

Snakes

Lamprophiidae

*Atractaspis andersonii*  
Boulenger, 1905

**B**

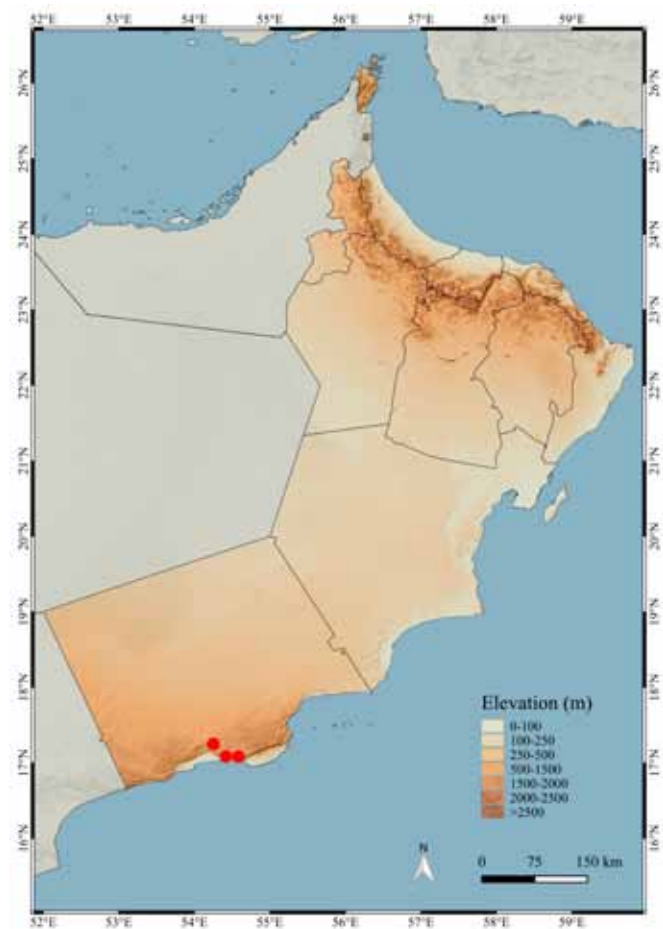

**A**

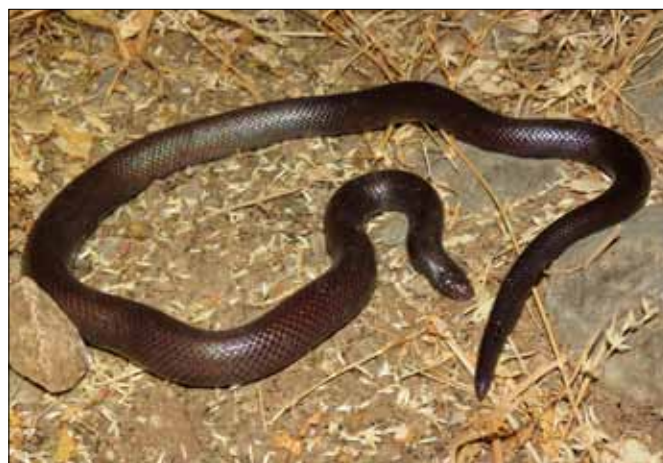

**C**

Useful information

|                             |     |
|-----------------------------|-----|
| IUCN Category               | LC  |
| Endemic                     | NO  |
| Venomous                    | YES |
| Insular                     | NO  |
| Present in a protected area | NO  |

**D**

*Atractaspis andersonii*  
(N = 4)

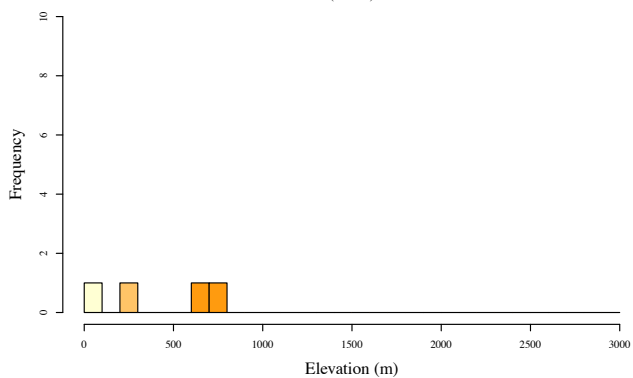

**F**

*Atractaspis andersonii*  
(N = 4)

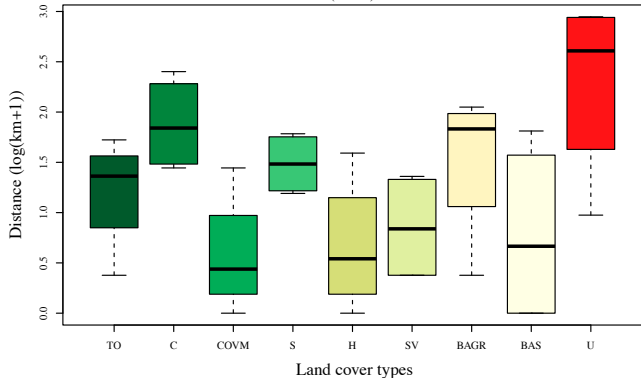

**E**

*Atractaspis andersonii*  
(N = 4)

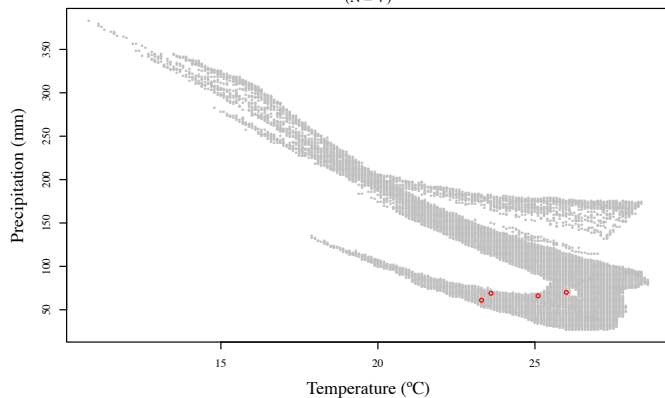

Lizards

Agamids

Geckos

Lacertids

Skinks

Amphisbaenids

Varamids

Snakes

Boidae

Colubridae

Elapidae

Lamprophiidae

Leptotyphlopidae

Typhlopidae

Viperidae

***Psammophis schokari***  
(Forskal, 1775)

**S90: Species information**

Snakes  
Lamprophiidae

A

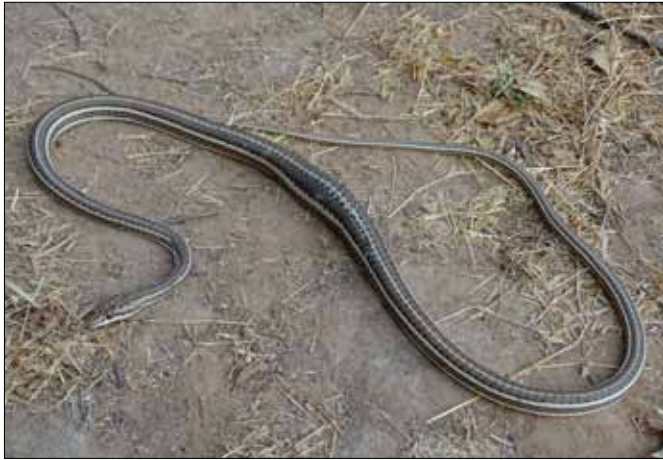

B

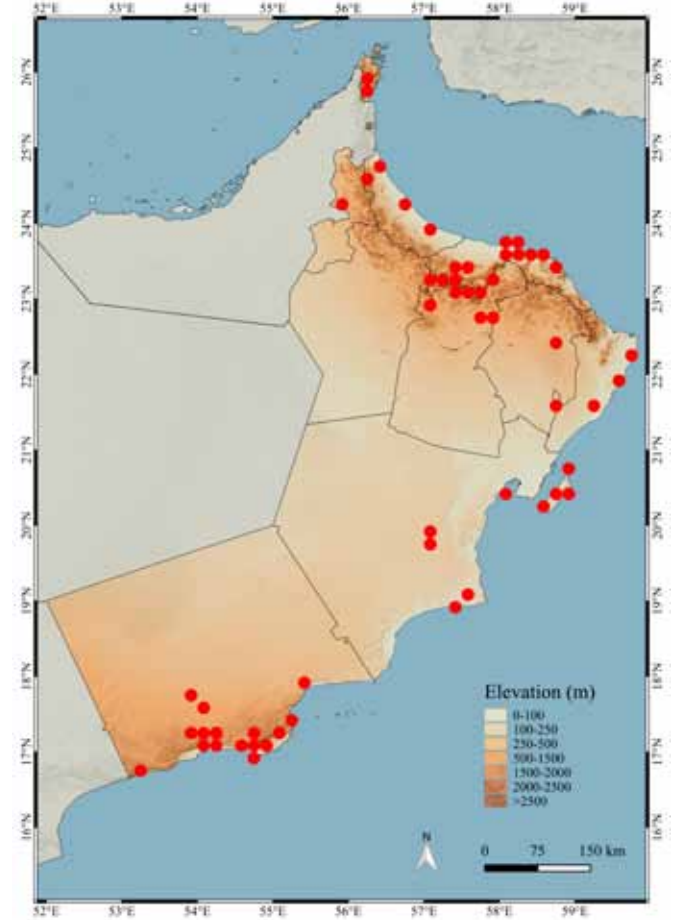

C

Useful information

|                             |     |
|-----------------------------|-----|
| IUCN Category               | LC* |
| Endemic                     | NO  |
| Venomous                    | NO  |
| Insular                     | YES |
| Present in a protected area | YES |

\*Not available on the web

D

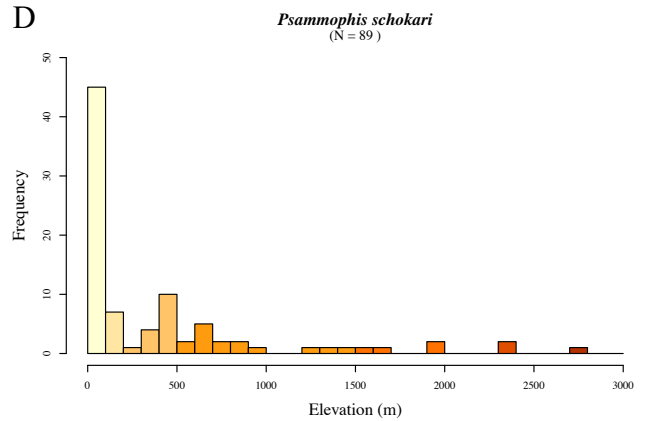

E

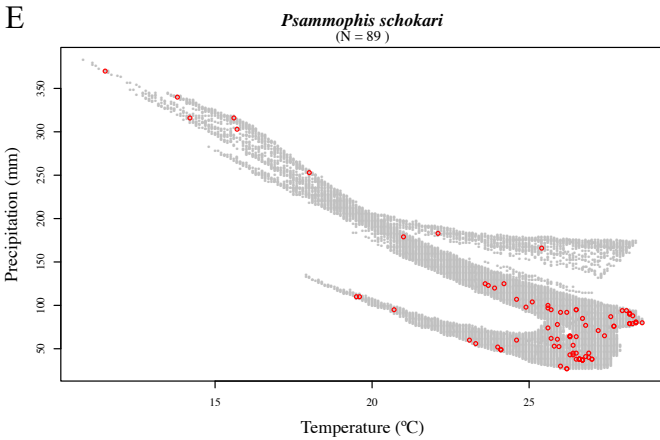

F

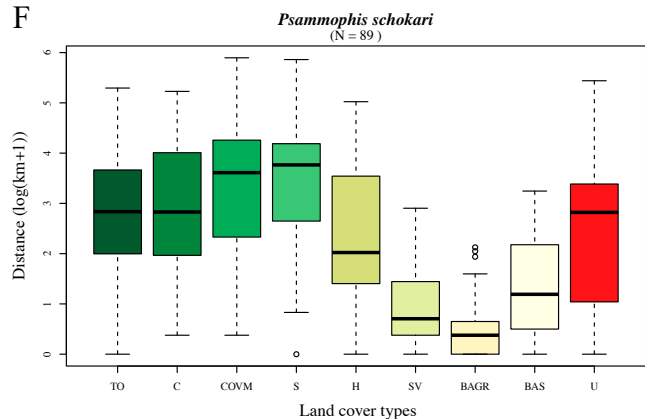

- Lizards
- Agamids
- Geckos
- Lacertids
- Skinks
- Amphisbaenids
- Varanids
- Snakes**
- Boiidae
- Colubridae
- Elapidae
- Lamprophiidae**
- Leptotyphlopidae
- Typhlopidae
- Viperidae

**S91: Species information**

Snakes

Lamprophiidae

***Rhagerhis moilensis***  
(Reuss, 1834)

**B**

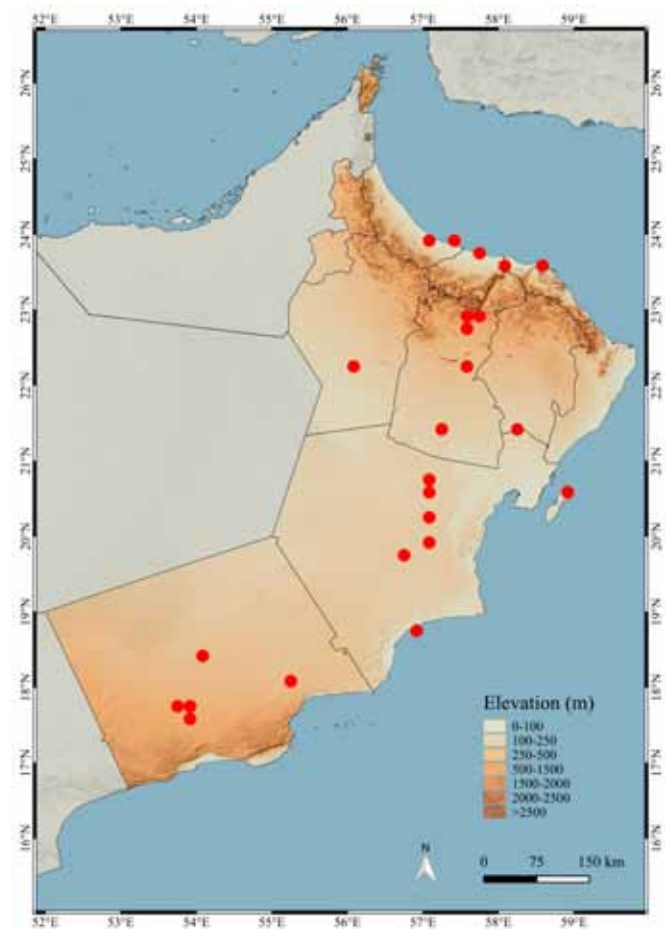

**A**

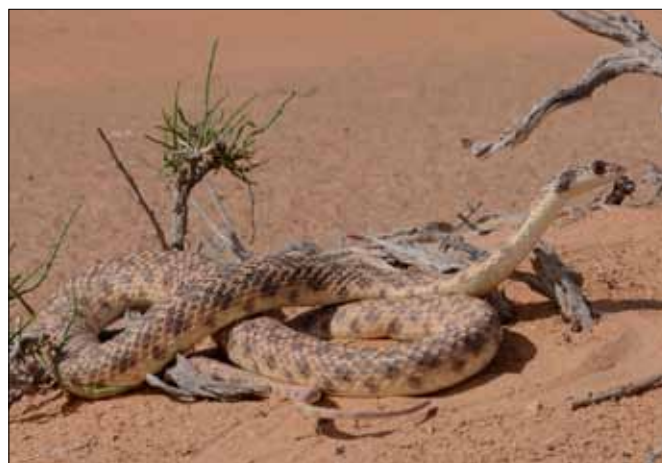

**C**

Useful information

|                             |     |
|-----------------------------|-----|
| IUCN Category               | LC* |
| Endemic                     | NO  |
| Venomous                    | NO  |
| Insular                     | YES |
| Present in a protected area | YES |

\*Not available on the web

**D**

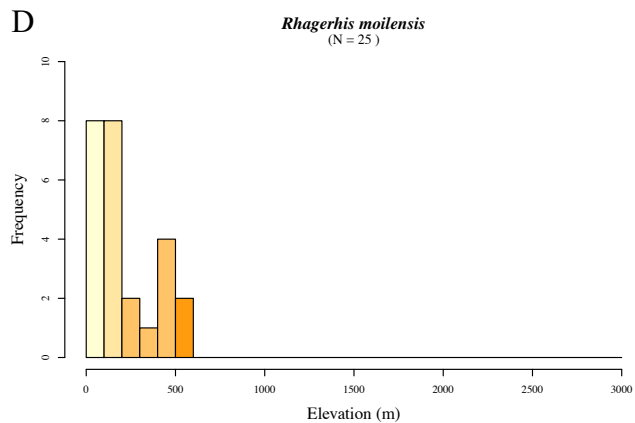

**F**

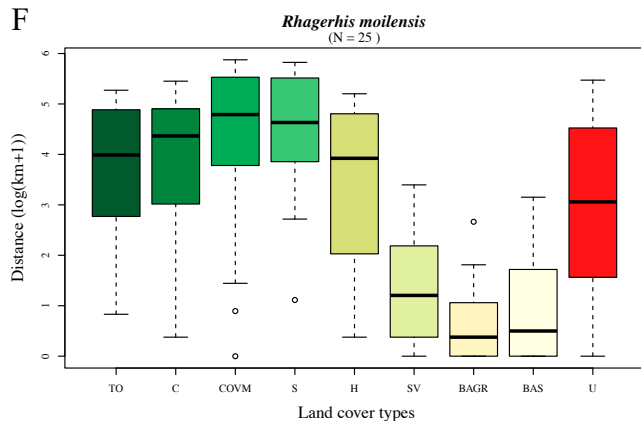

**E**

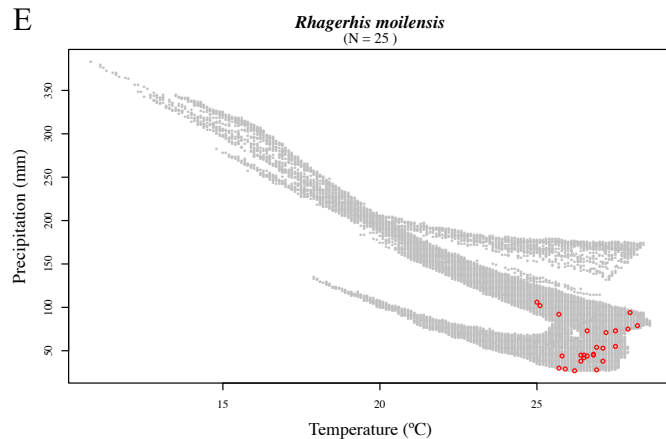

- Lizards
- Agamids
- Geckos
- Lacertids
- Skinks
- Amphisbaenids
- Varamids
- Snakes**
- Boidae
- Colubridae
- Elapidae
- Lamprophiidae**
- Leptotyphlopidae
- Typhlopidae
- Viperidae

***Myriopholis macrorhyncha***  
(Jan, 1860)

**S92: Species information**

Snakes

Leptotyphlopidae

A

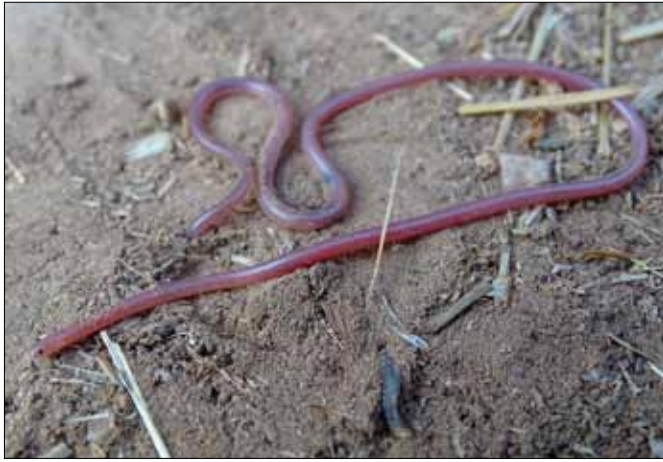

B

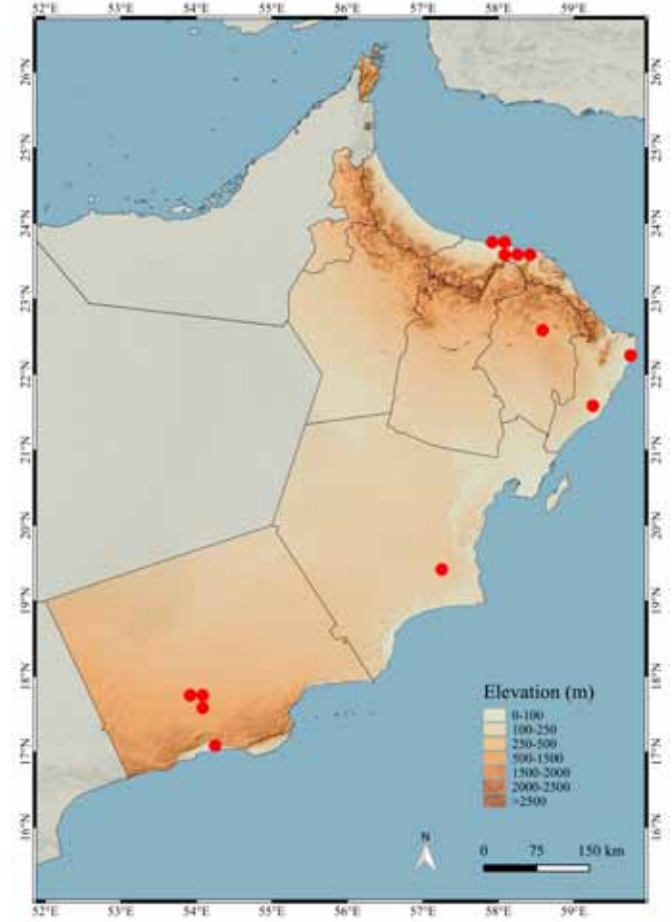

C

Useful information

|                             |     |
|-----------------------------|-----|
| IUCN Category               | LC* |
| Endemic                     | NO  |
| Venomous                    | NO  |
| Insular                     | NO  |
| Present in a protected area | YES |

\*Not available on the web

D

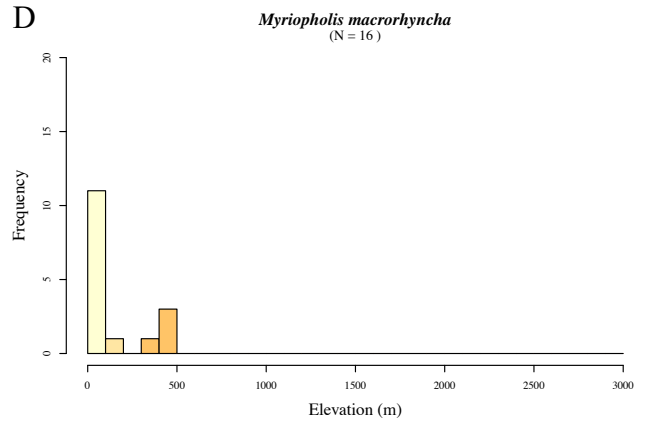

E

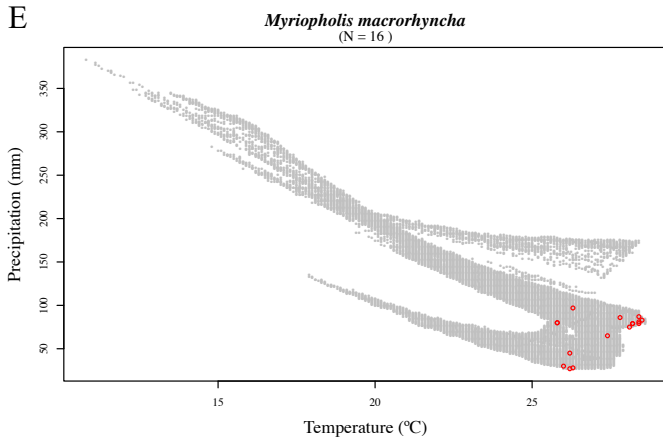

F

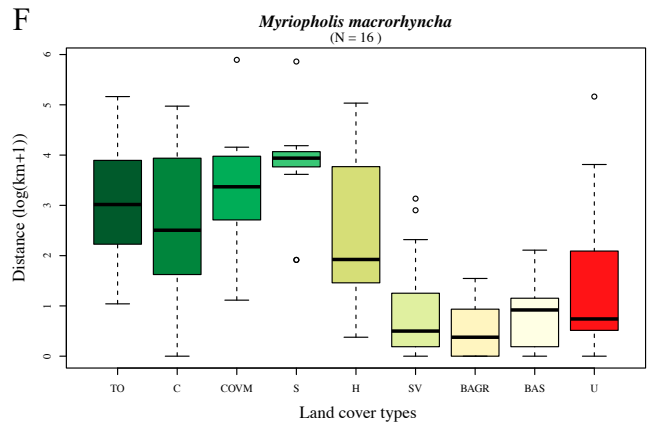

- Lizards
- Agamids
- Geckos
- Lacertids
- Skinks
- Amphisbaenids
- Varanids
- Snakes**
- Boidae
- Colubridae
- Elapidae
- Lamprophiidae
- Leptotyphlopidae**
- Typhlopidae
- Viperidae

**S93: Species information**

Snakes

Leptotyphlopidae

*Myriopholis nursii*  
(Anderson, 1896)

**B**

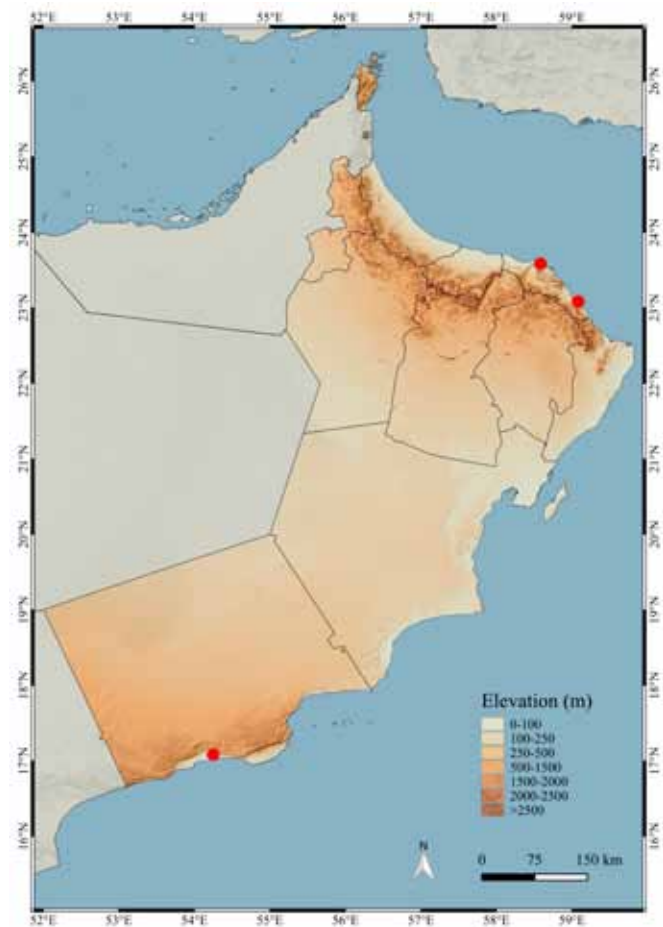

**A**

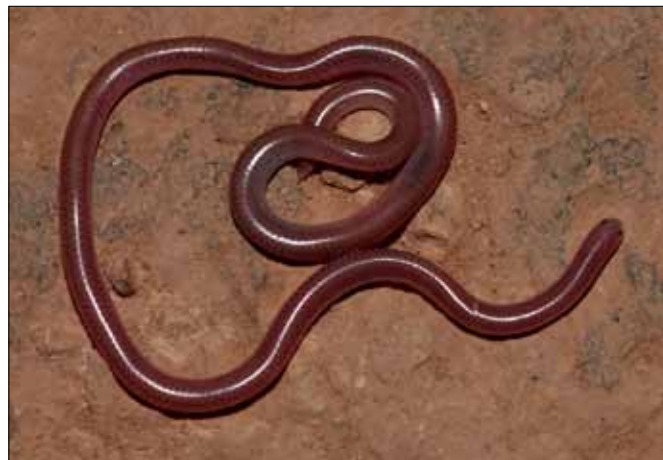

**C**

Useful information

|                             |     |
|-----------------------------|-----|
| IUCN Category               | LC* |
| Endemic                     | NO  |
| Venomous                    | NO  |
| Insular                     | NO  |
| Present in a protected area | YES |

\*Not available on the web

**D**

*Myriopholis nursii*  
(N = 3)



**F**

*Myriopholis nursii*  
(N = 3)

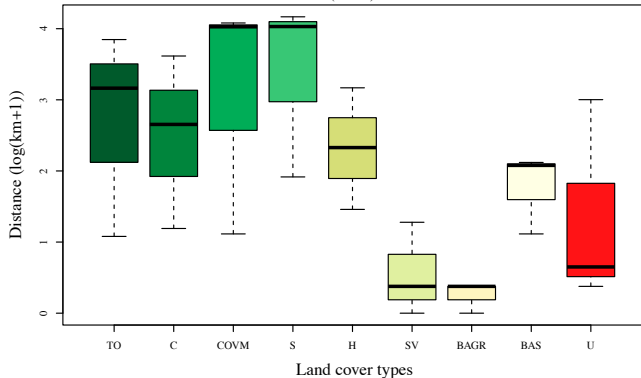

**E**

*Myriopholis nursii*  
(N = 3)

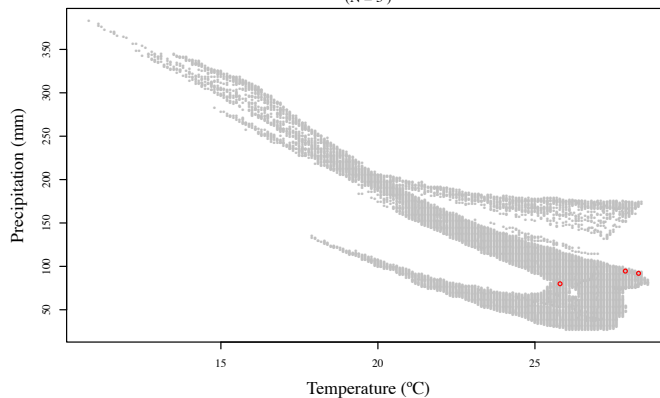

***Indotyphlops braminus***  
(Daudin, 1803)

**S94: Species information**

Snakes  
Typhlopidae

A

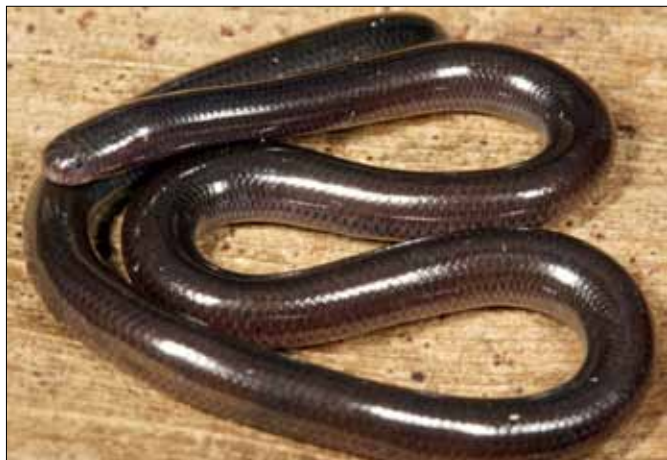

B

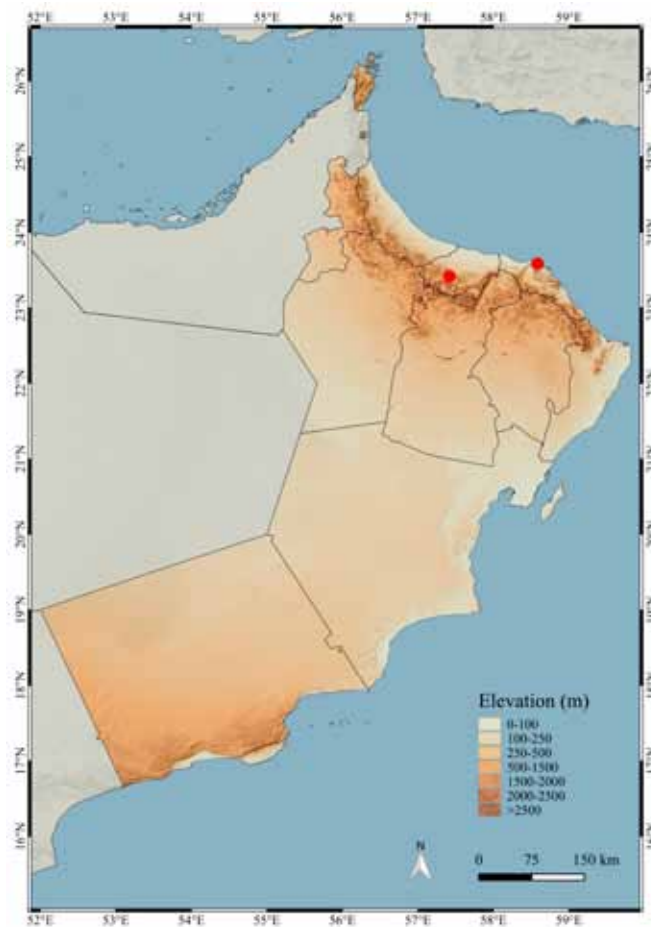

C

Useful information

|                             |     |
|-----------------------------|-----|
| IUCN Category               | LC* |
| Endemic                     | NO  |
| Venomous                    | NO  |
| Insular                     | NO  |
| Present in a protected area | NO  |

\*Not available on the web

D

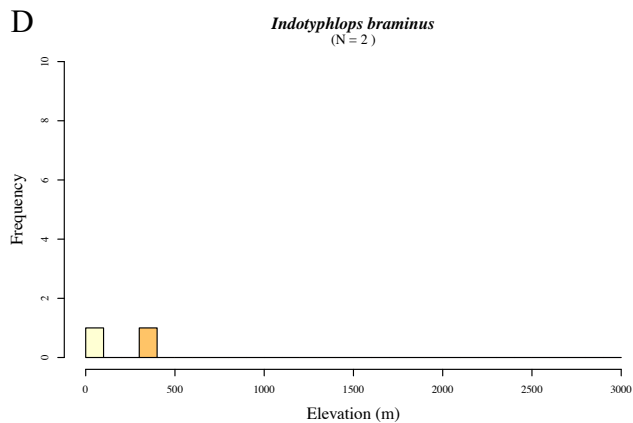

E

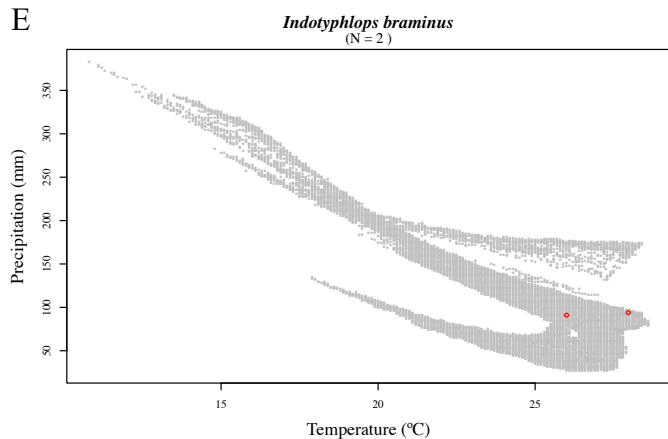

F

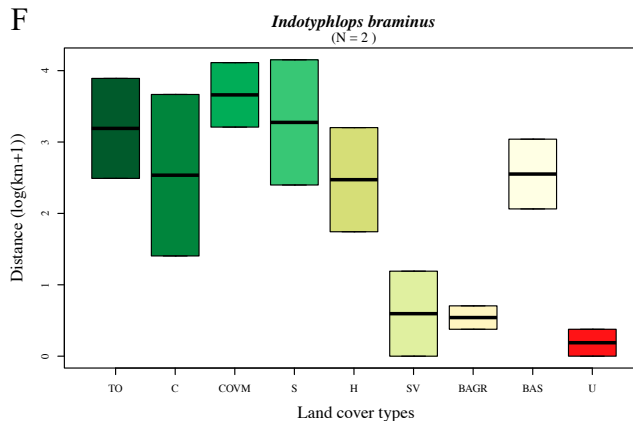

- Lizards
- Agamids
- Geckos
- Lacertids
- Skinks
- Amphisbaenids
- Varanids
- Snakes**
- Boiidae
- Colubridae
- Elapidae
- Lamprophiidae
- Leptotyphlopidae
- Typhlopidae**
- Viperidae

**S95: Species information**

Snakes  
Viperidae

***Bitis arietans***  
**Merrem, 1820**

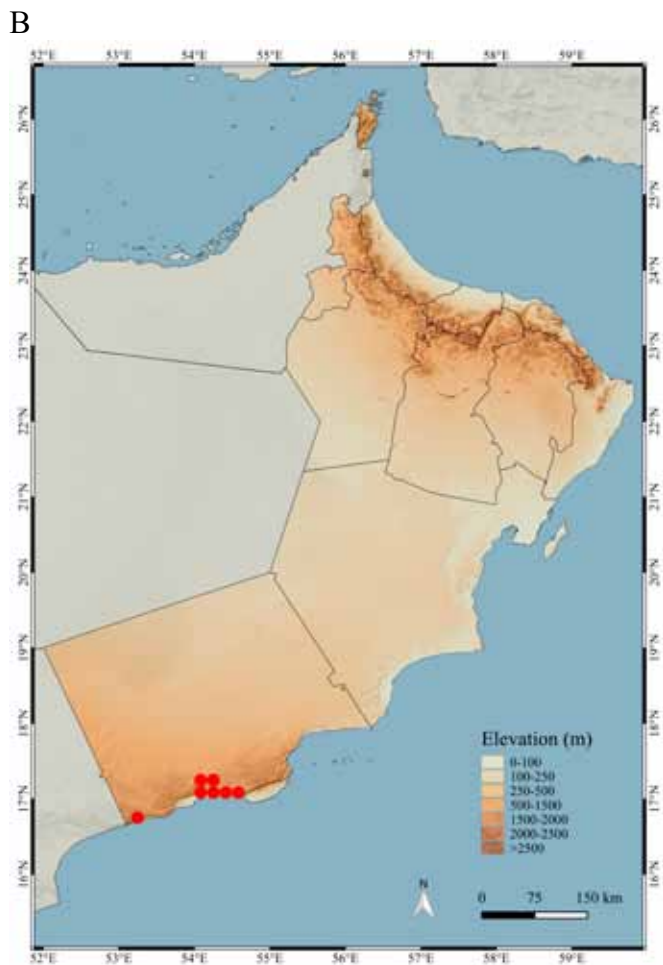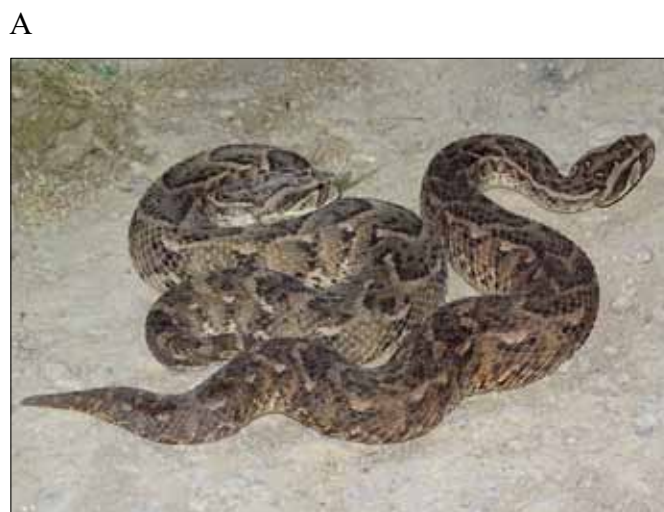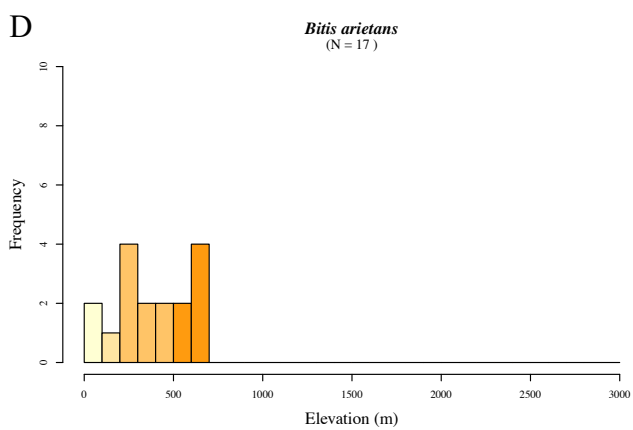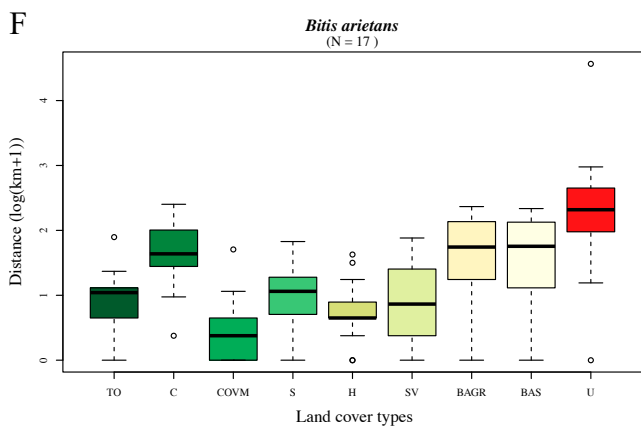

**C**

Useful information

|                             |     |
|-----------------------------|-----|
| IUCN Category               | LC* |
| Endemic                     | NO  |
| Venomous                    | YES |
| Insular                     | NO  |
| Present in a protected area | NO  |

\*Not available on the web

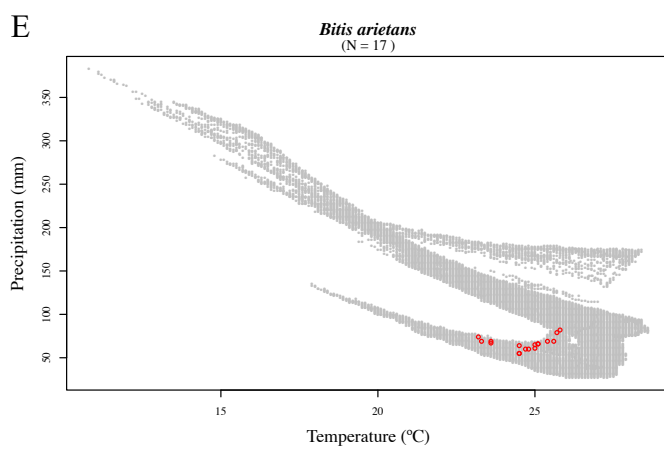

***Cerastes gasperettii gasperettii***  
 Leviton & Anderson, 1967

**S96: Species information**

Snakes  
 Viperidae

A

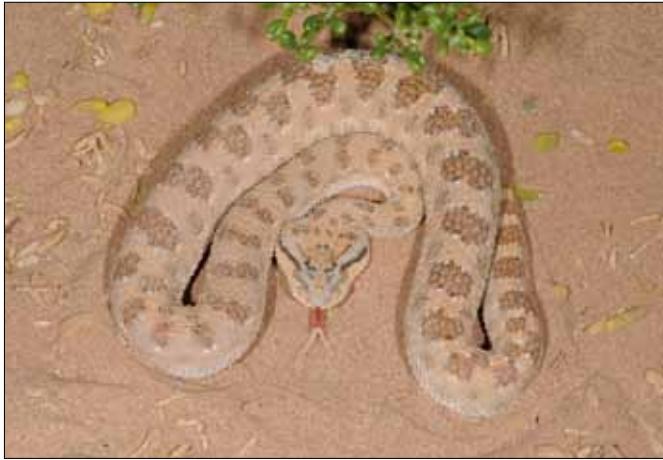

B

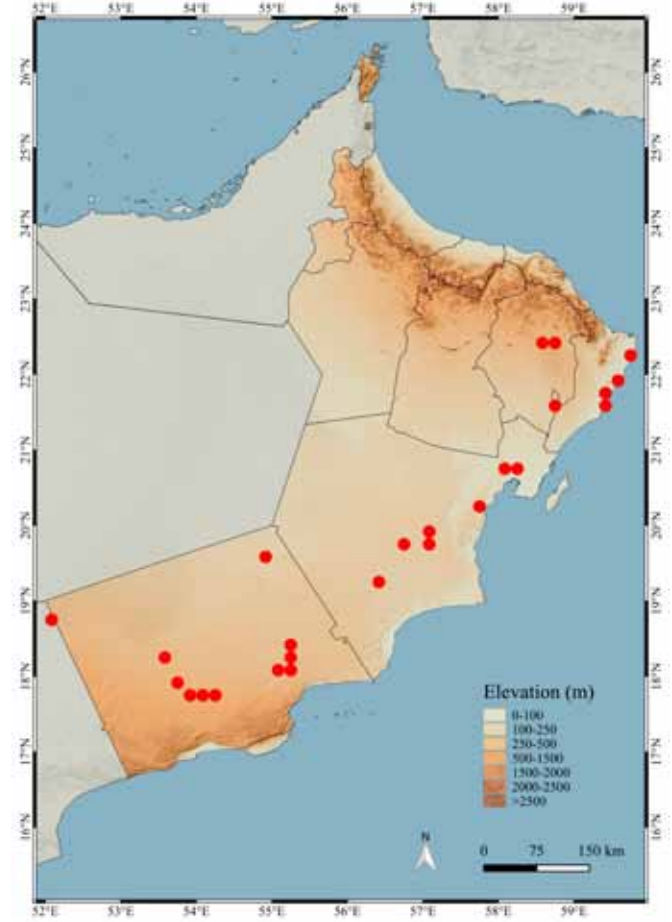

C

Useful information

|                             |     |
|-----------------------------|-----|
| IUCN Category               | LC  |
| Endemic                     | NO  |
| Venomous                    | YES |
| Insular                     | NO  |
| Present in a protected area | YES |

D

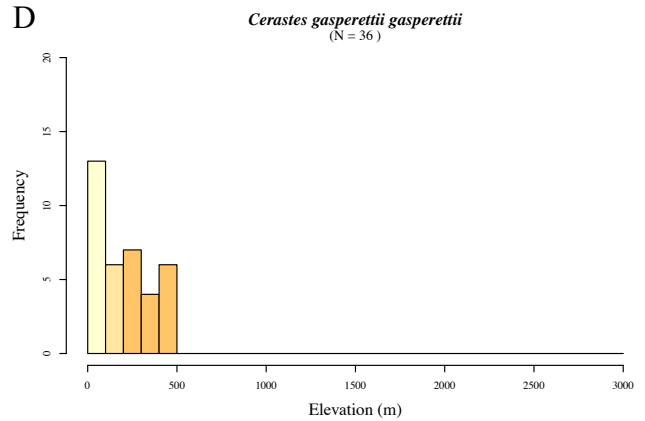

E

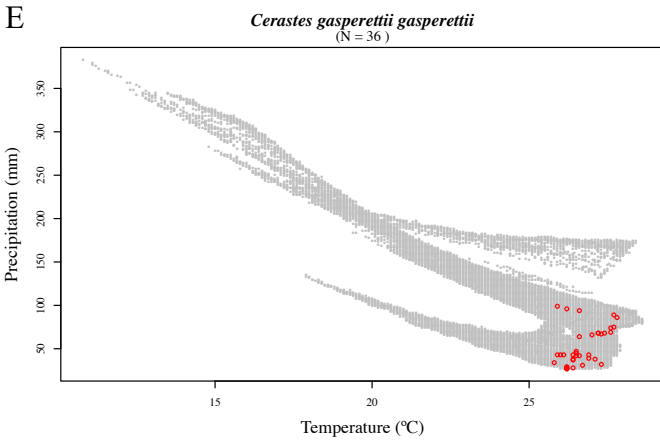

F

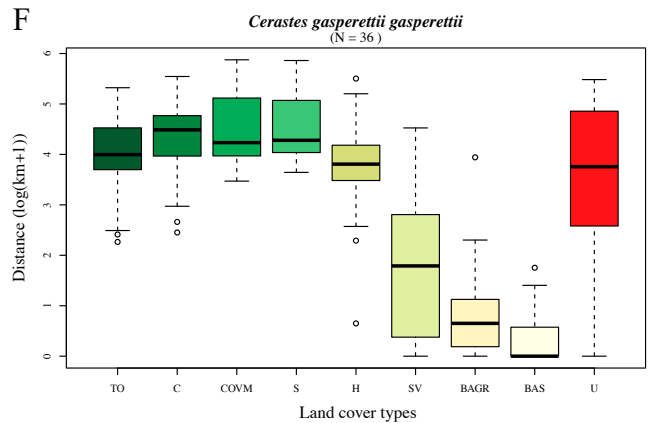

- Lizards
- Agamids
- Gekcos
- Lacertids
- Skinks
- Amphisbaenids
- Varanids
- Snakes**
- Boidae
- Colubridae
- Elapidae
- Lamprophiidae
- Leptotyphlopidae
- Typhlopidae
- Viperidae



**S97: Species information**

Snakes  
Viperidae

*Echis carinatus sochureki*  
Stemmler, 1969

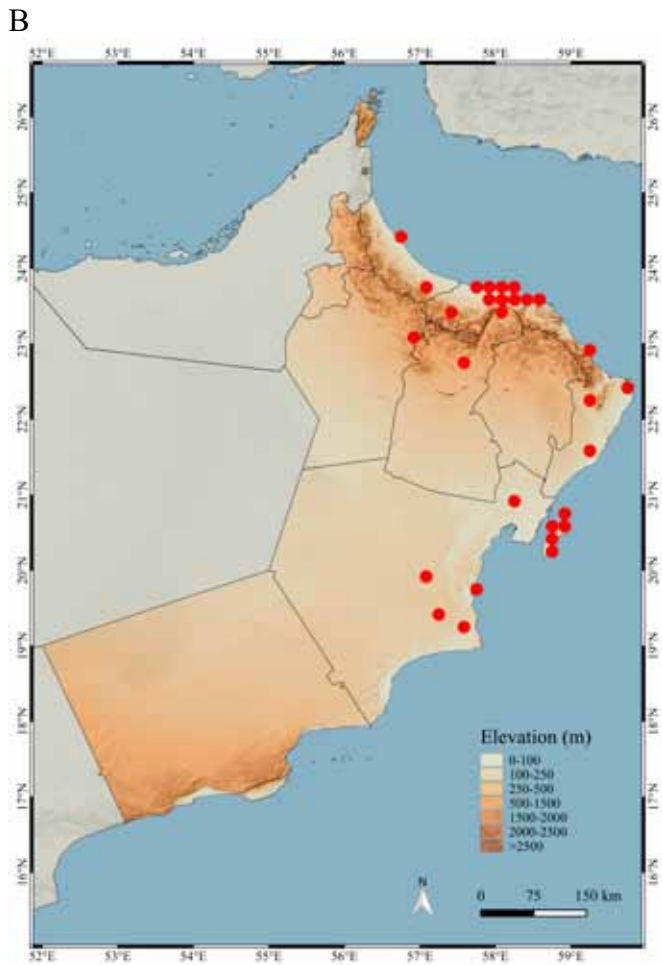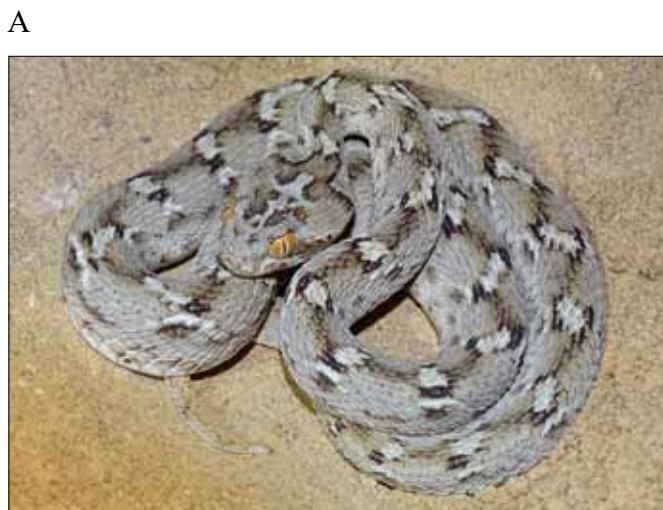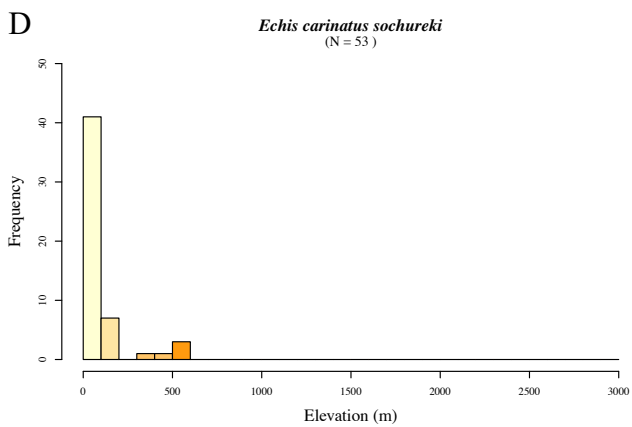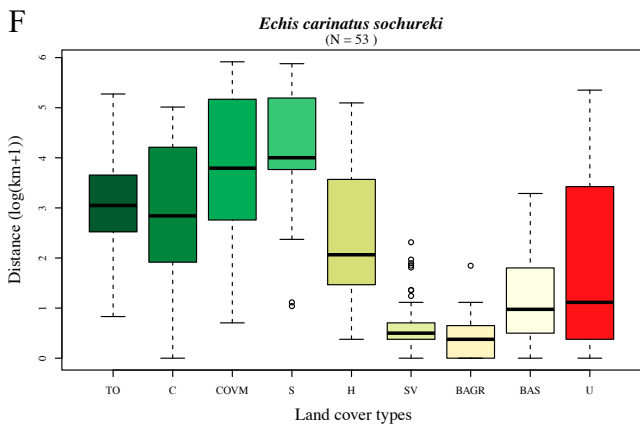

**C**

Useful information

|                             |     |
|-----------------------------|-----|
| IUCN Category               | LC* |
| Endemic                     | NO  |
| Venomous                    | YES |
| Insular                     | YES |
| Present in a protected area | YES |

\*Not available on the web

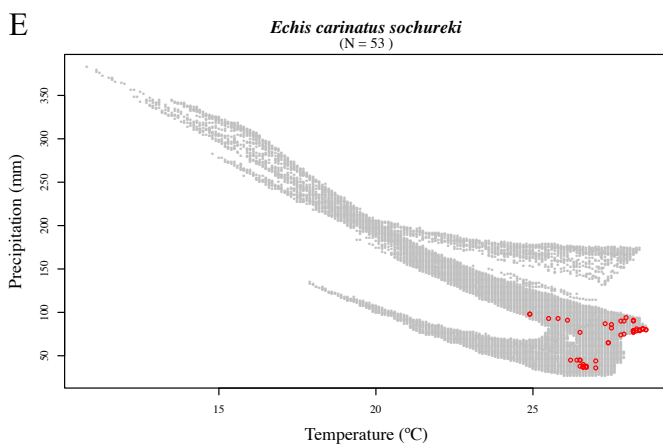

- Lizards
- Agamids
- Geckos
- Lacertids
- Skinks
- Amphisbaenids
- Varamids
- Snakes**
- Boidae
- Colubridae
- Elapidae
- Lamprophiidae
- Leptotyphlopidae
- Typhlopidae
- Viperidae

***Echis coloratus***  
**Günther, 1878**

**S98: Species information**

Snakes  
 Viperidae

A

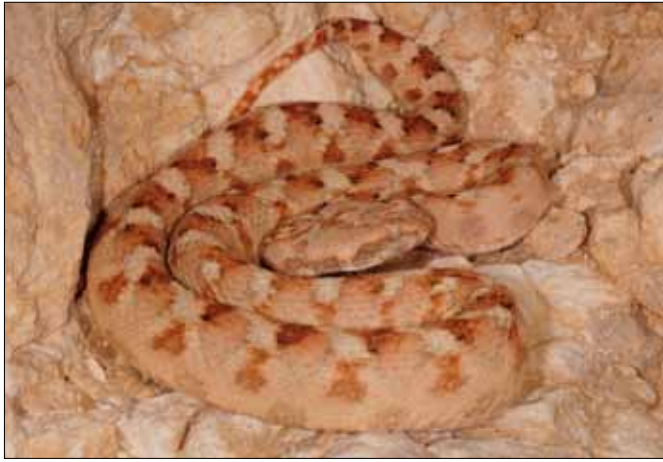

B

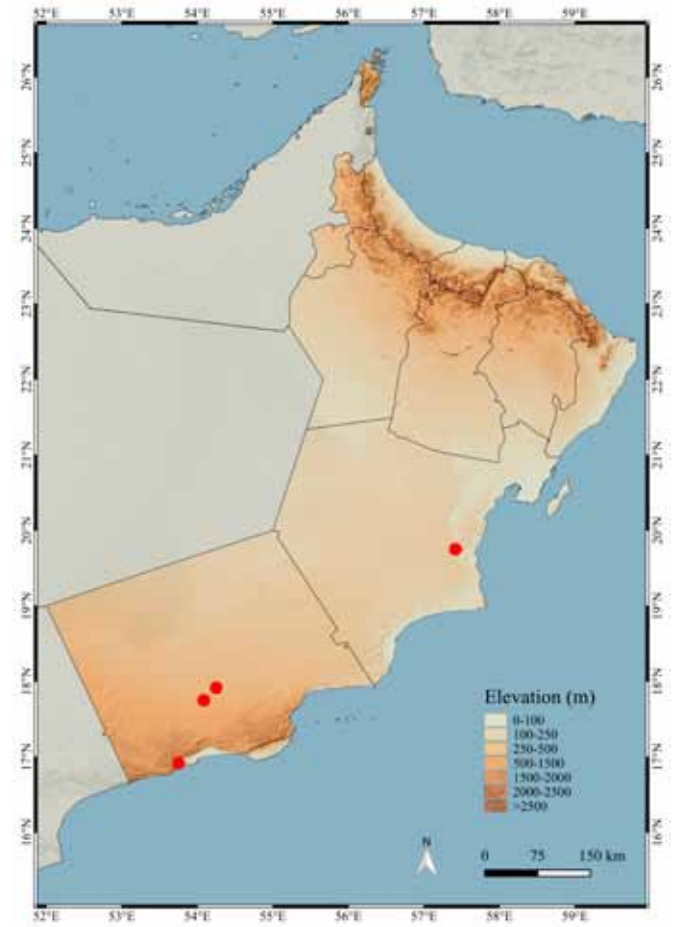

C

Useful information

|                             |     |
|-----------------------------|-----|
| IUCN Category               | LC* |
| Endemic                     | NO  |
| Venomous                    | YES |
| Insular                     | NO  |
| Present in a protected area | YES |

\*Not available on the web

D

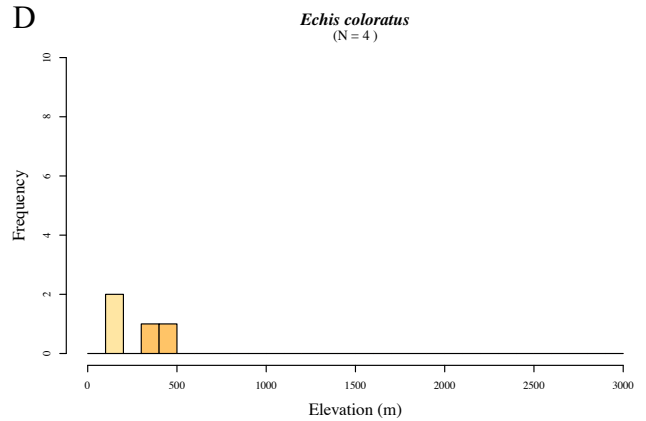

E

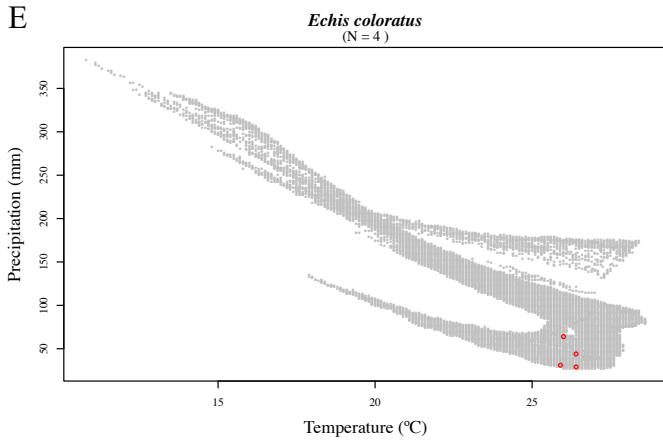

F

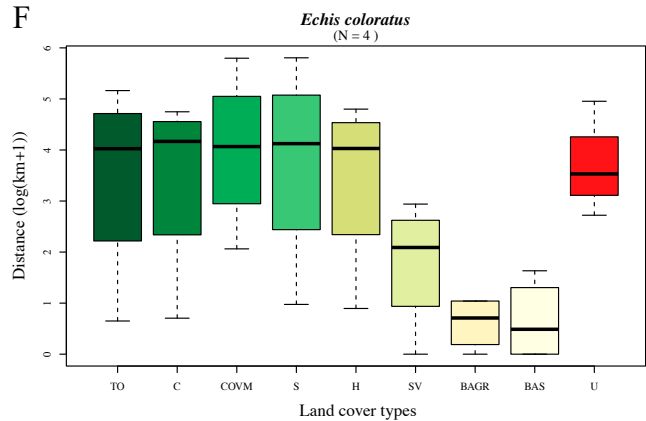

- Lizards
- Agamids
- Geckos
- Lacertids
- Skinks
- Ampeliscaenids
- Varanids
- Snakes**
- Boiidae
- Colubridae
- Elapidae
- Lamprophiidae
- Leptotyphlopidae
- Typhlopidae
- Viperidae

**S99: Species information**

Snakes  
Viperidae

*Echis khosatzkii*  
Cherlin, 1990

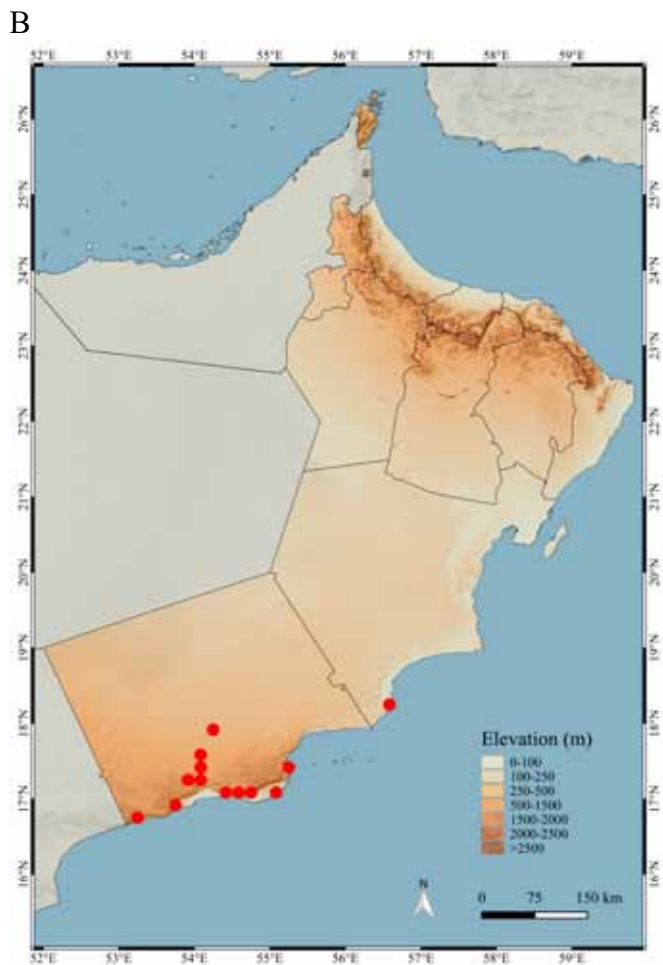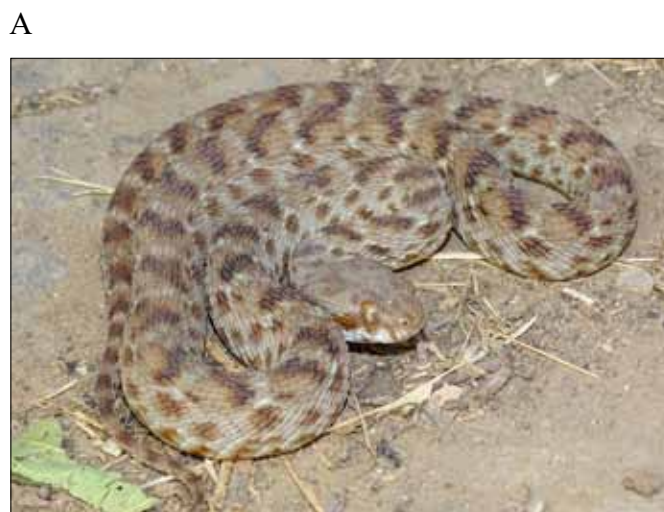

**C**

| Useful information          |     |
|-----------------------------|-----|
| IUCN Category               | LC  |
| Endemic                     | NO  |
| Venomous                    | YES |
| Insular                     | NO  |
| Present in a protected area | YES |

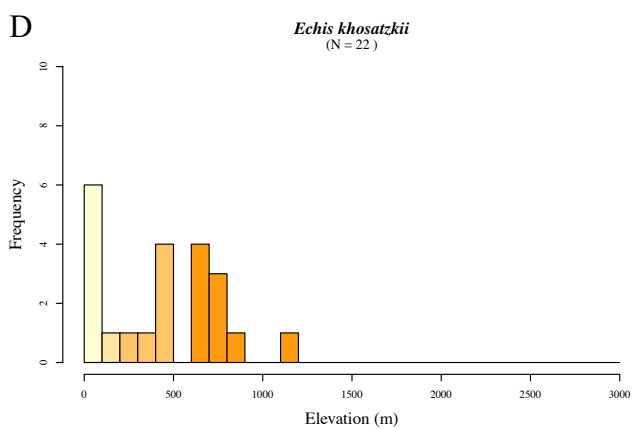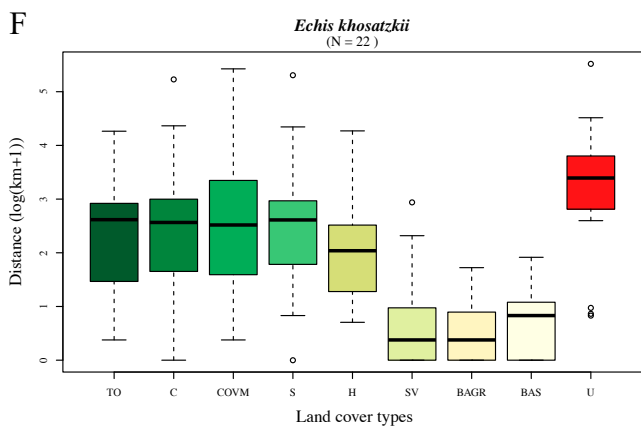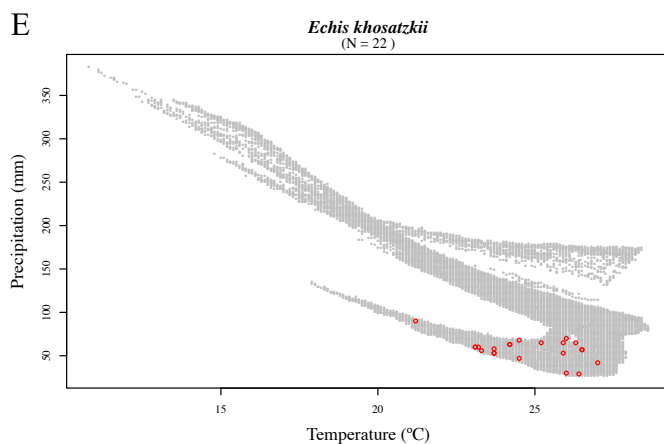

- Lizards
- Agamids
- Geckos
- Lacertids
- Skinks
- Amphisbaenids
- Varamids
- Snakes**
- Boidae
- Colubridae
- Elapidae
- Lamprophiidae
- Leptotyphlopidae
- Typhlopidae
- Viperidae

***Echis omanensis***  
**Babocsay, 2004**

**S100: Species information**

Snakes  
 Viperidae

A

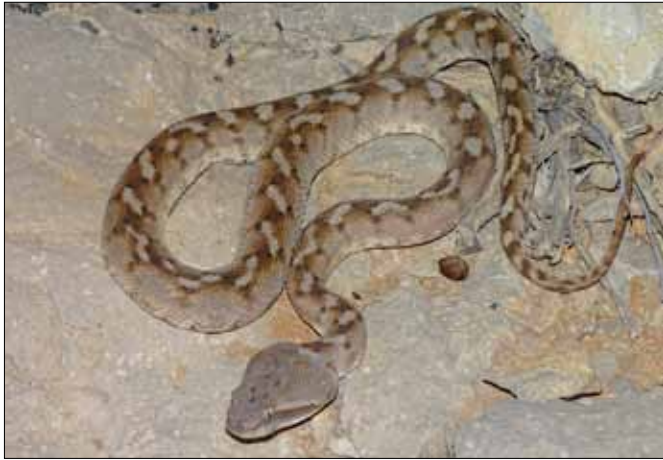

B

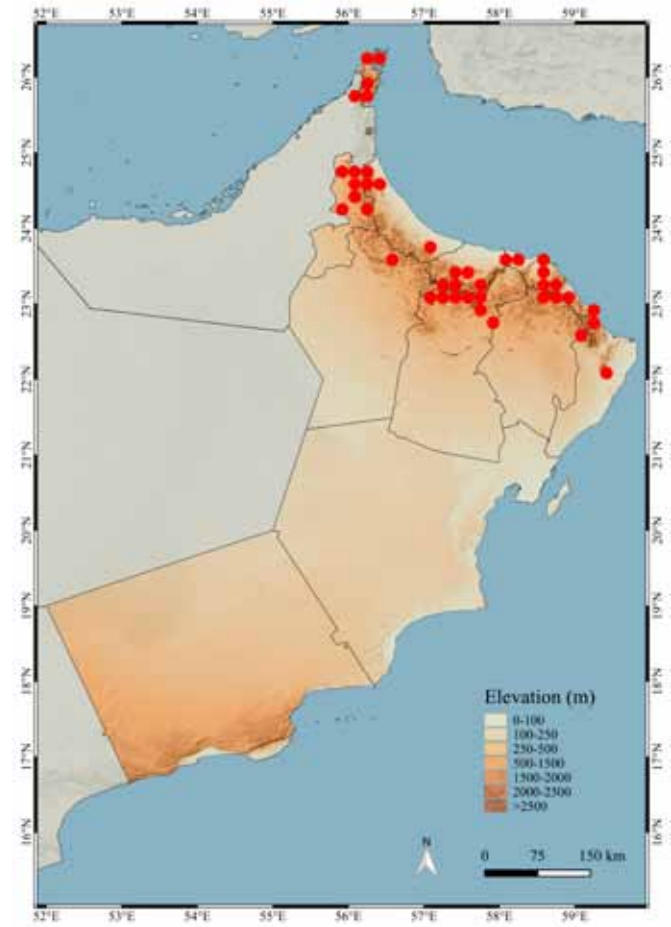

C

Useful information

|                             |     |
|-----------------------------|-----|
| IUCN Category               | LC  |
| Endemic                     | NO  |
| Venomous                    | YES |
| Insular                     | NO  |
| Present in a protected area | YES |

D

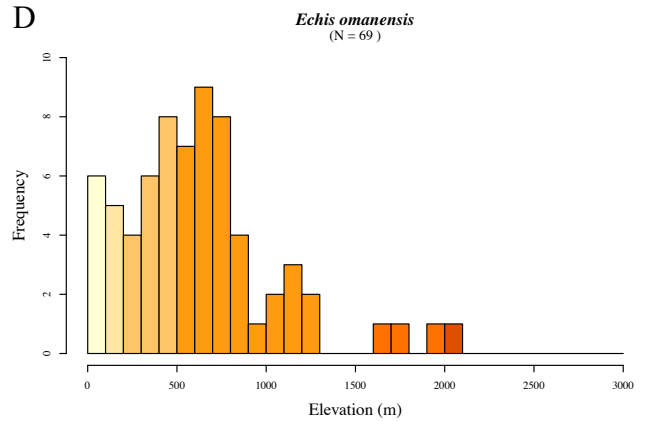

E

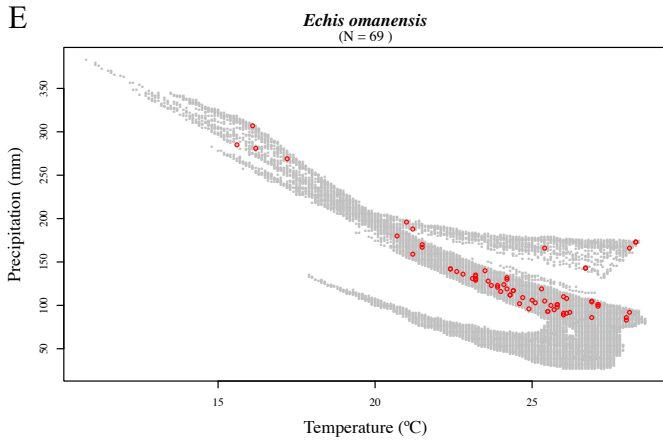

F

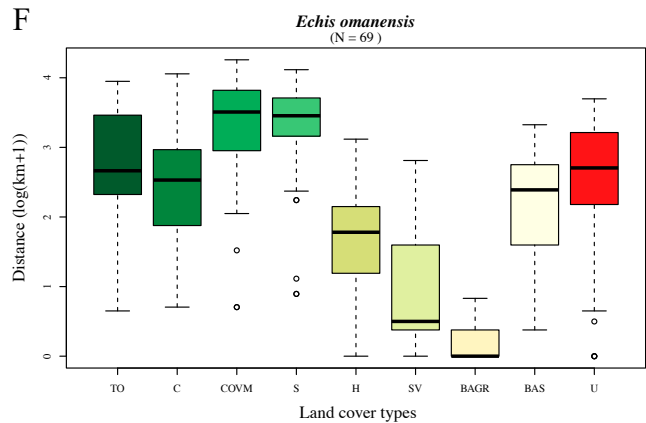

- Lizards
- Agamids
- Gekcos
- Lacertids
- Skinks
- Amphisbaenids
- Varanids
- Snakes**
- Boiidae
- Colubridae
- Elapidae
- Lamprophiidae
- Leptotyphlopidae
- Typhlopidae
- Viperidae

**S101: Species information**

Snakes  
Viperidae

*Pseudocerastes persicus*  
(Duméril, Bibron & Duméril, 1854)

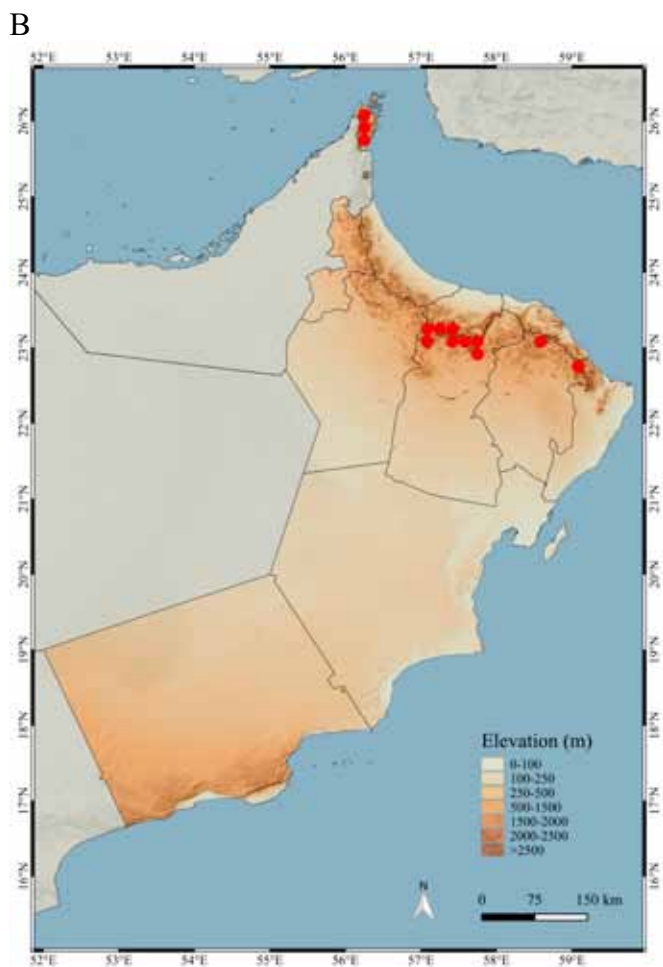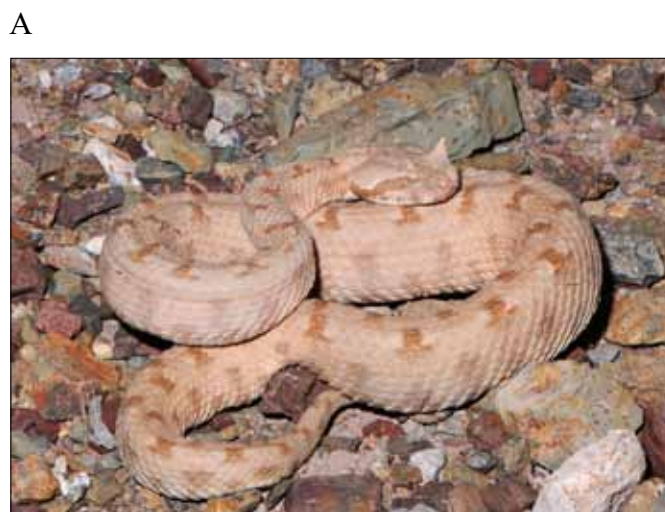

**C**

| Useful information          |     |
|-----------------------------|-----|
| IUCN Category               | LC  |
| Endemic                     | NO  |
| Venomous                    | YES |
| Insular                     | NO  |
| Present in a protected area | YES |

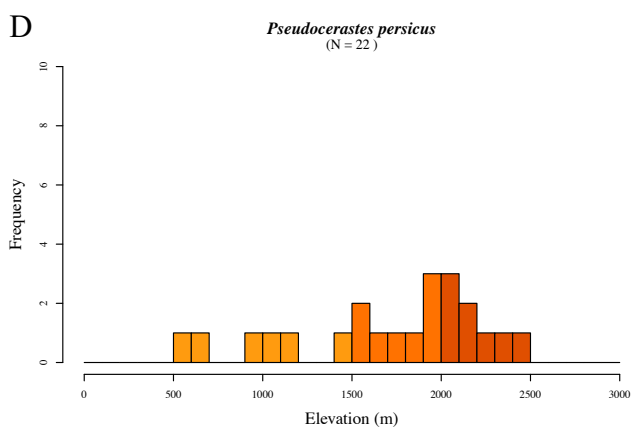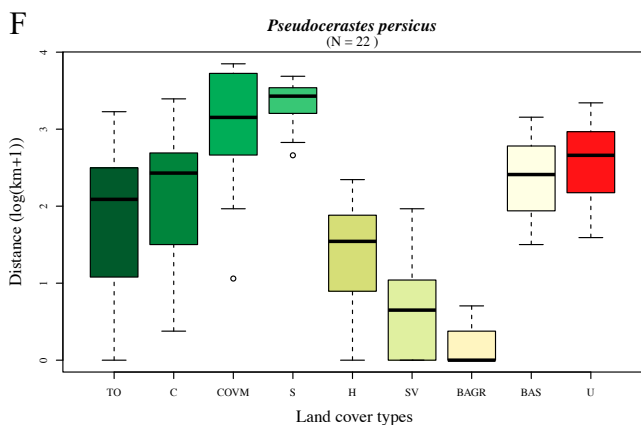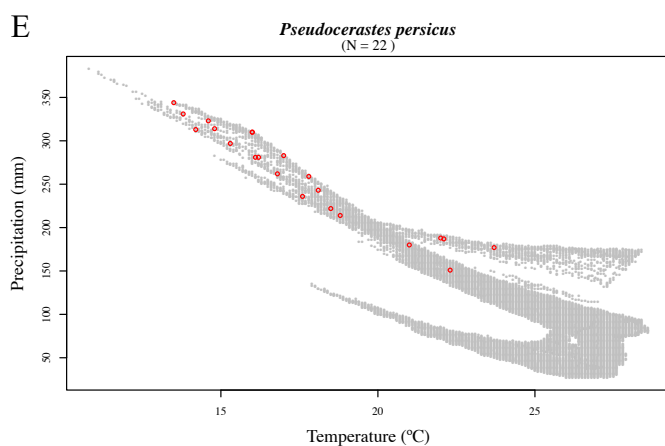

- Lizards
- Agamids
- Geckos
- Lacertids
- Skinks
- Amphisbaenids
- Varamids
- Snakes**
- Boidae
- Colubridae
- Elapidae
- Lamprophiidae
- Leptotyphlopidae
- Typhlopidae
- Viperidae**

# Snakebite Protocol

As shown in the present Atlas, the nine venomous terrestrial snakes belong to three different families: **Family Elapidae:** *Naja Arabica*; **Family Lamprophiidae:** *Atractaspis andersonii*; **Family Viperidae:** *Bitis arietans*, *Cerastes gasperettii gasperettii*, *Echis carinarus sochureki*, *Echis coloratus*, *Echis khosatzkii*, *Echis omanensis* and *Pseudocerastes persicus*.

The venoms of these nine species have different effects and it is very important that the bitten person is transported to a medical facility as quickly as possible. The following guidelines are only essential first-aid procedures.

1.- Move the victim to safety form the area where people might be bitten again. It is important to bear in mind that all nine venomous snakes of Oman are capable of biting repeatedly. If possible, take a picture of the snake for identification or try to remember some characteristics such as size, head shape and coloration.

2.- It is VERY IMPORTANT to calm down and reassure the victim, who may be terrified as a result of the snakebite. This step is crucial and is justified as in many occasions venomous snakes give “dry bites”, which are bites in which venoms is not injected and therefore they do not produce any medical complication. But even if the victim is envenomed, there should be enough time to arrive to the nearest medical facility in Oman.

3.- Immediately remove constricting clothing, rings, bracelets, bands, sock, shoes, etc. from the bitten limb, as in most occasions swelling occurs immediately after the bite.

4.- Immobilize the whole patient, especially the bitten limb, using a sling and try to keep the bitten limb below the level of the patient’s heart. Muscular contractions anywhere in the body but especially in the bitten limb help to spread the venom from the site of the bite, so it is very important that the patient does not move.

5.- Transport the patient to a medical facility without any further delay.

## **IT IS VERY IMPORTANT THAT AFTER A BITE:**

1.- **DO NOT** give the victim any food water or medication until reaching a medical facility. If there is a considerable delay before reaching medical aid (several hours to days) then give clear fluids by mouth to prevent dehydration.

2.- **DO NOT** use Tourniquets, cut, suck, scarify, press or touch the wound or apply ice, hot water, chemicals or electric shocks. These measures are useless and potentially dangerous.

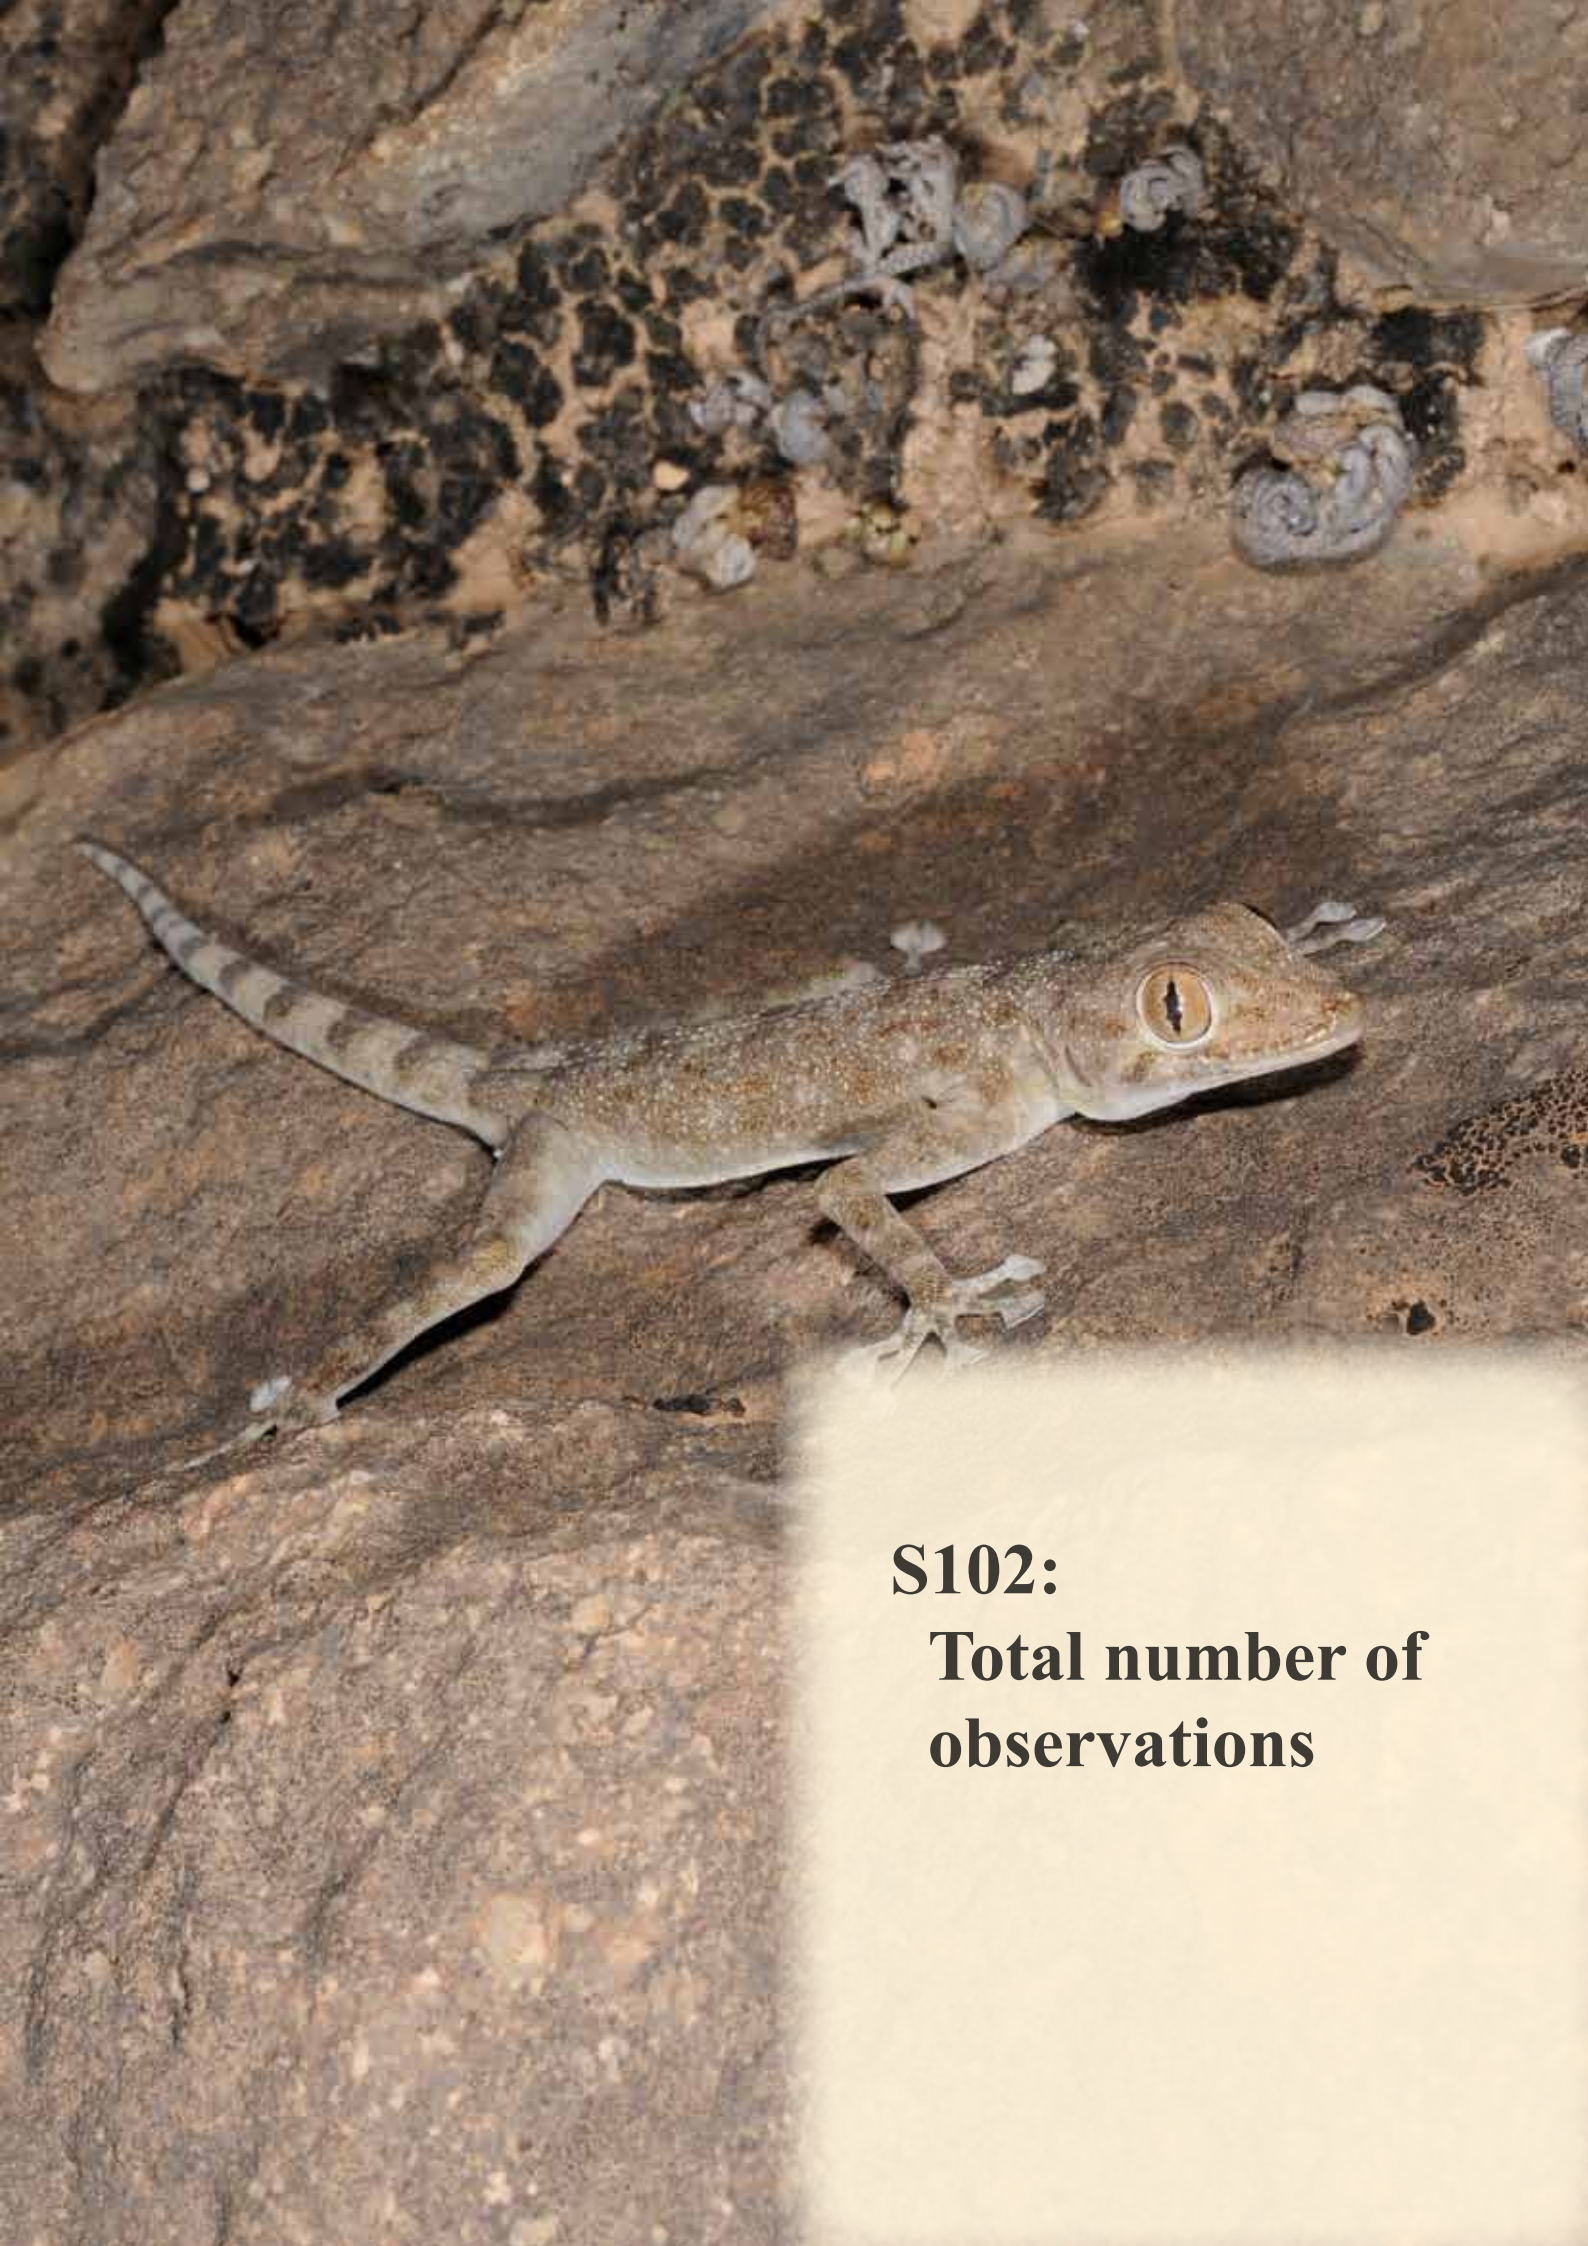

**S102:**

**Total number of  
observations**

## S102: Total number of observations

Species list of the terrestrials reptiles of Oman with the total number of observations and observations of each specie.

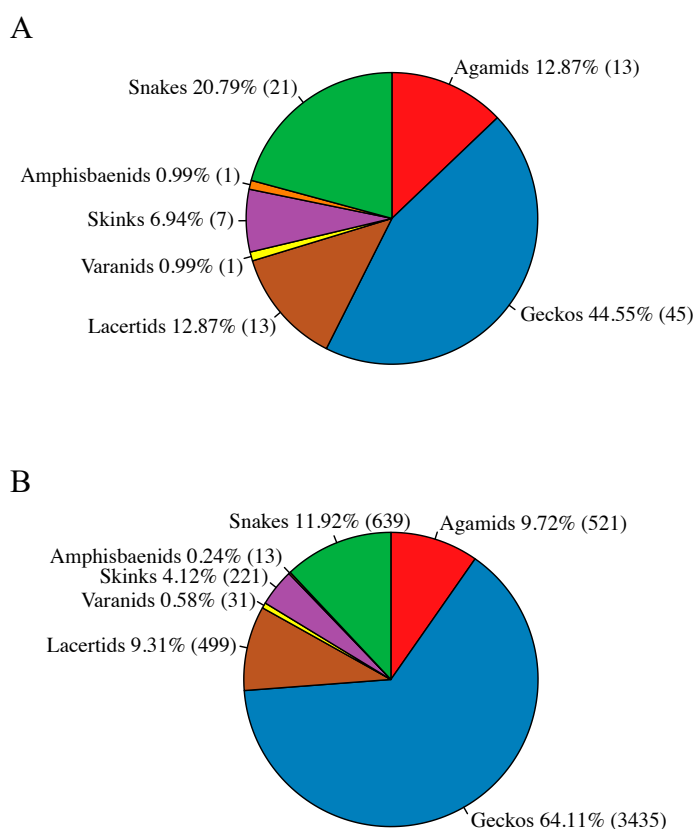

Main taxonomic groups observed. Percentage of the total number of A) species and B) observations in the seven main taxonomic groups of Oman reptiles in the database (between parenthesis, the respective number of observation).



## S102: Total number of observations

| Observations   |                                         |              | Observations         |                                          |              |
|----------------|-----------------------------------------|--------------|----------------------|------------------------------------------|--------------|
| Taxa           | Family/Specie                           | Observations | Taxa                 | Family/Specie                            | Observations |
| <b>Lizards</b> |                                         | <b>4720</b>  | <b>Lizards</b>       |                                          | <b>4720</b>  |
| <b>Agamids</b> |                                         | <b>521</b>   | <b>Lacertids</b>     |                                          | <b>499</b>   |
|                | <b>Agamidae</b>                         |              |                      | <b>Lacertidae</b>                        |              |
|                | <i>Acanthocercus adramitanus</i>        | 26           |                      | <i>Acanthodactylus blanfordii</i>        | 27           |
|                | <i>Calotes versicolor</i>               | 43           |                      | <i>Acanthodactylus boskianus</i>         | 25           |
|                | <i>Phrynocephalus arabicus</i>          | 18           |                      | <i>Acanthodactylus felicis</i>           | 30           |
|                | <i>Phrynocephalus maculatus</i>         | 15           |                      | <i>Acanthodactylus haasi</i>             | 6            |
|                | <i>Phrynocephalus sakoi</i>             | 44           |                      | <i>Acanthodactylus masirae</i>           | 30           |
|                | <i>Pseudotrapelus dhofarensis</i>       | 84           |                      | <i>Acanthodactylus opheodurus</i>        | 27           |
|                | <i>Pseudotrapelus jensvindumi</i>       | 100          |                      | <i>Acanthodactylus schmidti</i>          | 62           |
|                | <i>Trapelus flavimaculatus</i>          | 61           |                      | <i>Mesalina adramitana</i>               | 108          |
|                | <i>Uromastyx aegyptia leptieni</i>      | 11           |                      | <i>Mesalina ayunensis</i>                | 5            |
|                | <i>Uromastyx aegyptia microlepis</i>    | 37           |                      | <i>Mesalina</i> sp. 1                    | 10           |
|                | <i>Uromastyx benti</i>                  | 15           |                      | <i>Mesalina</i> sp. 2                    | 1            |
|                | <i>Uromastyx thomasi</i>                | 20           |                      | <i>Omanosaura cyanura</i>                | 40           |
|                | <b>Chamaeleonidae</b>                   |              |                      | <i>Omanosaura jayakari</i>               | 128          |
|                | <i>Chamaeleo arabicus</i>               | 47           | <b>Skinks</b>        |                                          | <b>221</b>   |
| <b>Geckos</b>  |                                         | <b>3435</b>  |                      | <b>Scincidae</b>                         |              |
|                | <b>Gekkonidae</b>                       |              |                      | <i>Ablepharus pannonicus</i>             | 25           |
|                | <i>Bunopus tuberculatus</i>             | 102          |                      | <i>Chalcides ocellatus ocellatus</i>     | 28           |
|                | <i>Cyrtopodion scabrum</i>              | 26           |                      | <i>Heremites septemtaeniatus</i>         | 2            |
|                | <i>Hemidactylus alkiyumii</i>           | 137          |                      | <i>Scincus mitranus</i>                  | 70           |
|                | <i>Hemidactylus endophis</i>            | 1            |                      | <i>Scincus scincus conirostris</i>       | 1            |
|                | <i>Hemidactylus festivus</i>            | 62           |                      | <i>Trachylepis brevicollis</i>           | 33           |
|                | <i>Hemidactylus flaviviridis</i>        | 55           |                      | <i>Trachylepis tessellata</i>            | 62           |
|                | <i>Hemidactylus hajarensis</i>          | 65           | <b>Amphisbaenids</b> |                                          | <b>13</b>    |
|                | <i>Hemidactylus inexpectatus</i>        | 33           |                      | <b>Trogonophidae</b>                     |              |
|                | <i>Hemidactylus lemuringus</i>          | 33           |                      | <i>Diplometopon zarudnyi</i>             | 13           |
|                | <i>Hemidactylus leschenaultii</i>       | 3            | <b>Varanids</b>      |                                          | <b>31</b>    |
|                | <i>Hemidactylus luqueorum</i>           | 55           |                      | <b>Varanidae</b>                         |              |
|                | <i>Hemidactylus masirahensis</i>        | 10           |                      | <i>Varanus griseus</i>                   | 31           |
|                | <i>Hemidactylus minutus</i>             | 70           | <b>Snakes</b>        |                                          | <b>639</b>   |
|                | <i>Hemidactylus paucituberculatus</i>   | 44           |                      | <b>Boidae</b>                            |              |
|                | <i>Hemidactylus persicus</i>            | 1            |                      | <i>Eryx jayakari</i>                     | 22           |
|                | <i>Hemidactylus robustus</i>            | 135          |                      | <b>Colubridae</b>                        |              |
|                | <i>Hemidactylus</i> sp.                 | 1            |                      | <i>Lytrohynchus diadema diadema</i>      | 22           |
|                | <i>Pseudoceramadactylus khobarensis</i> | 15           |                      | <i>Platyceps rhodorachis rhodorachis</i> | 149          |
|                | <i>Stenodactylus arabicus</i>           | 32           |                      | <i>Platyceps thomasi</i>                 | 13           |
|                | <i>Stenodactylus doriae</i>             | 75           |                      | <i>Rhynchocalamus arabicus</i>           | 2            |
|                | <i>Stenodactylus leptocosymbotes</i>    | 151          |                      | <i>Spalerosophis diadema cliffordii</i>  | 17           |
|                | <i>Stenodactylus sharqiyahensis</i>     | 54           |                      | <i>Telescopus dhara dhara</i>            | 36           |
|                | <i>Trachydactylus hajarensis</i>        | 98           |                      | <b>Elapidae</b>                          |              |
|                | <i>Trachydactylus spatulurus</i>        | 6            |                      | <i>Naja arabica</i>                      | 16           |
|                | <i>Tropicolotes scortecci</i>           | 19           |                      | <b>Lamprophiidae</b>                     |              |
|                | <i>Tropicolotes</i> sp.                 | 9            |                      | <i>Atractaspis andersonii</i>            | 4            |
|                | <b>Phyllodactylidae</b>                 |              |                      | <i>Psammophis schokari</i>               | 89           |
|                | <i>Asaccus gallagheri</i>               | 41           |                      | <i>Rhagerhis moilensis</i>               | 25           |
|                | <i>Asaccus gardneri</i>                 | 49           |                      | <b>Leptotyphlopidae</b>                  |              |
|                | <i>Asaccus margaritae</i>               | 9            |                      | <i>Myriopholis macrorhyncha</i>          | 16           |
|                | <i>Asaccus montanus</i>                 | 36           |                      | <i>Myriopholis nursii</i>                | 3            |
|                | <i>Asaccus platyrhynchus</i>            | 92           |                      | <b>Typhlopidae</b>                       |              |
|                | <i>Asaccus arnoldi</i>                  | 18           |                      | <i>Indotyphlops braminus</i>             | 2            |
|                | <i>Ptyodactylus dhofarensis</i>         | 72           |                      | <b>Viperidae</b>                         |              |
|                | <i>Ptyodactylus orlovi</i>              | 206          |                      | <i>Bitis arietans</i>                    | 17           |
|                | <i>Ptyodactylus ruusaljibalicus</i>     | 24           |                      | <i>Cerastes gasperettii gasperettii</i>  | 36           |
|                | <b>Sphaerodactylidae</b>                |              |                      | <i>Echis carinatus sochureki</i>         | 53           |
|                | <i>Pristurus carteri</i>                | 305          |                      | <i>Echis coloratus</i>                   | 4            |
|                | <i>Pristurus celerrimus</i>             | 152          |                      | <i>Echis khasatzkii</i>                  | 22           |
|                | <i>Pristurus gallagheri</i>             | 59           |                      | <i>Echis omanensis</i>                   | 69           |
|                | <i>Pristurus minimus</i>                | 155          |                      | <i>Pseudocerastes persicus</i>           | 22           |
|                | <i>Pristurus rupestris rupestris</i>    | 297          |                      |                                          |              |
|                | <i>Pristurus</i> sp. 1                  | 322          |                      |                                          |              |
|                | <i>Pristurus</i> sp. 2                  | 84           |                      |                                          |              |
|                | <i>Pristurus</i> sp. 3                  | 117          |                      |                                          |              |
|                | <i>Pristurus</i> sp. 4                  | 3            |                      |                                          |              |
|                | <i>Pristurus</i> sp. 5                  | 102          |                      |                                          |              |



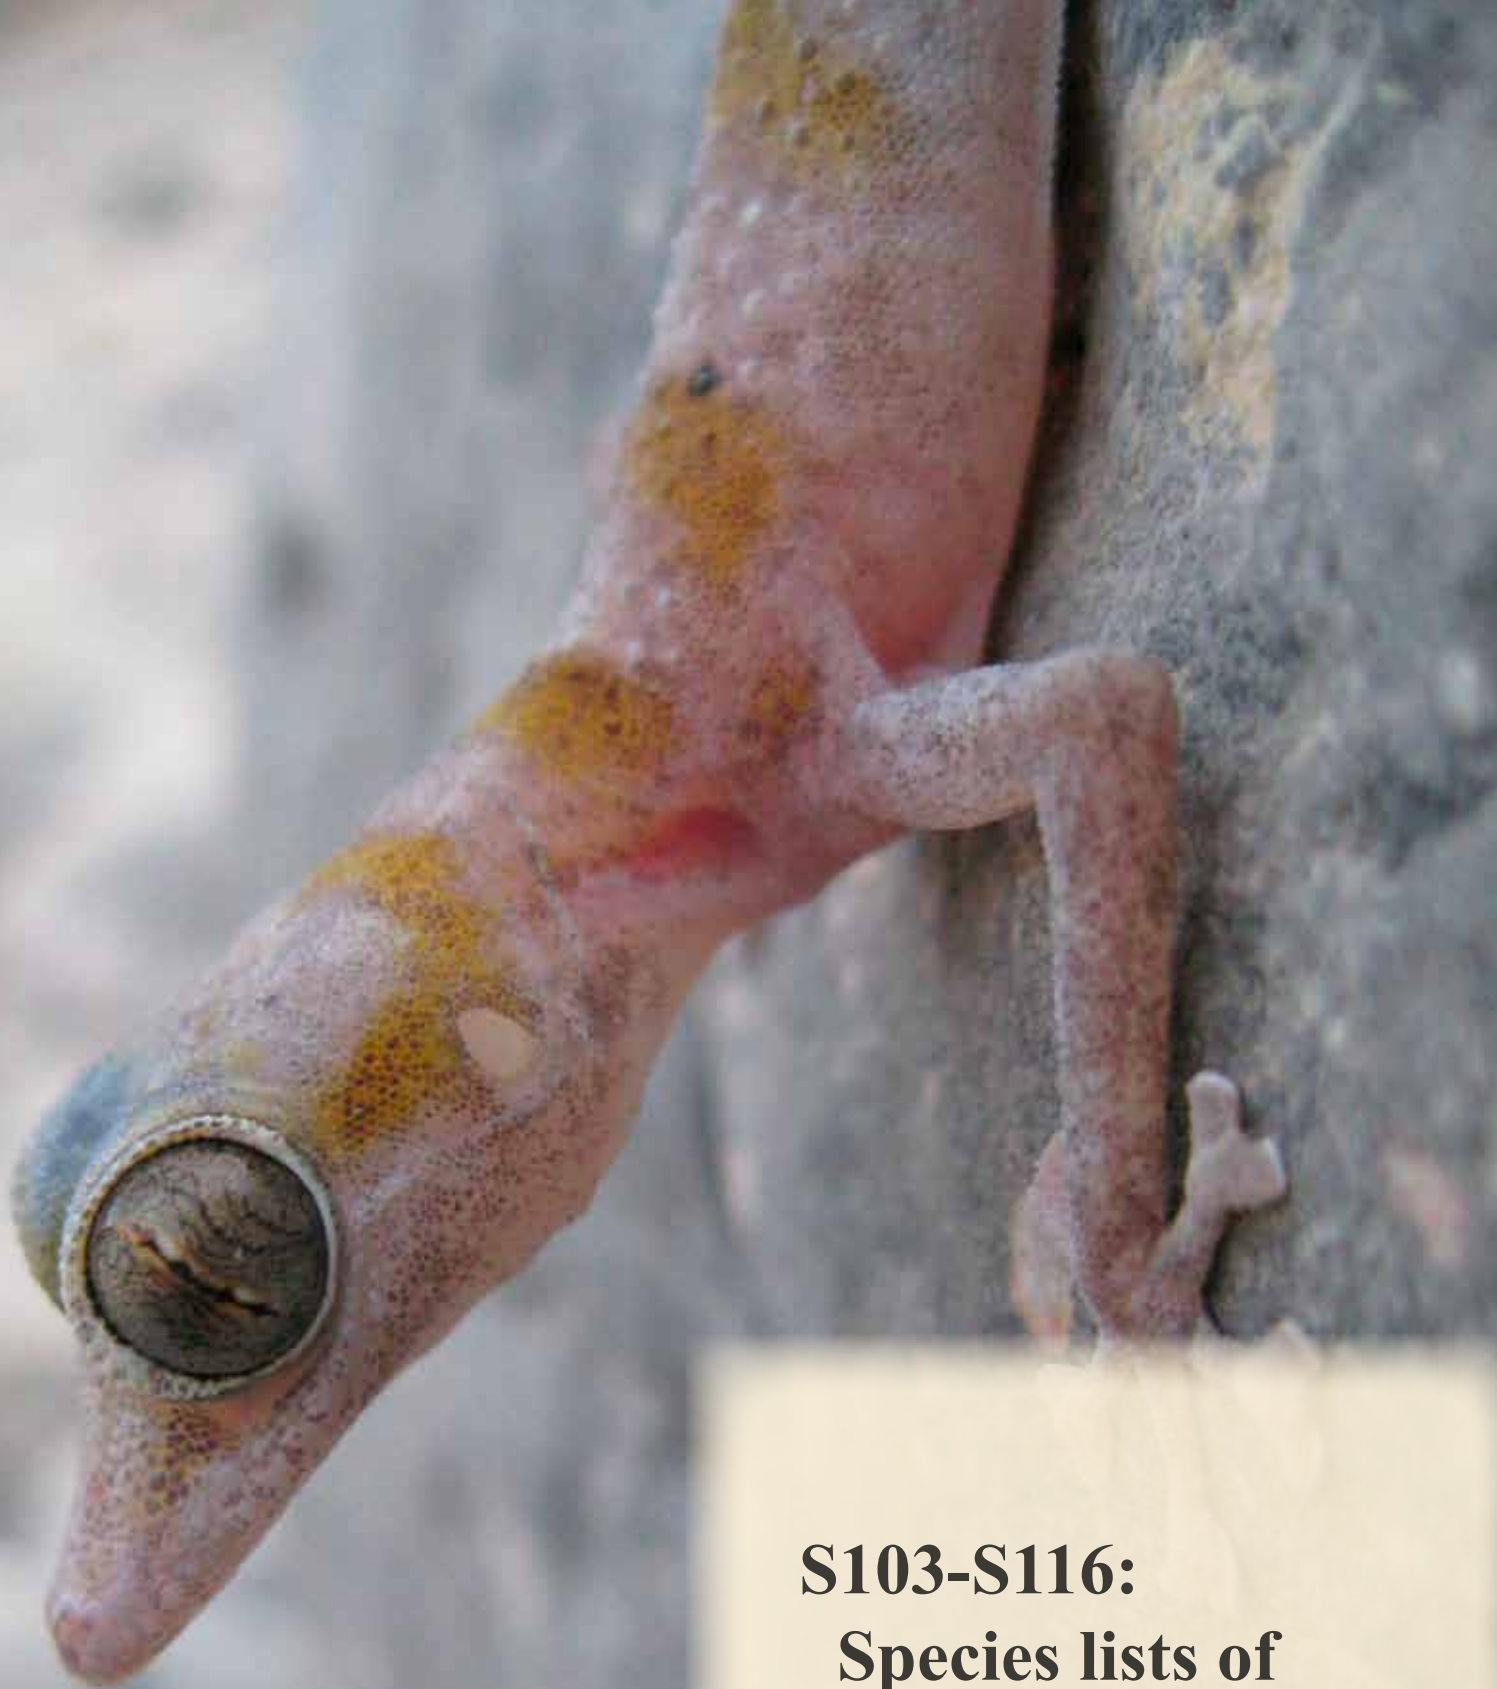

**S103-S116:  
Species lists of  
Oman**

## S103-S116: Species lists of Oman

**(S103-S104: Species lists of Oman)** Map of Oman with the checklist of the terrestrial reptiles of Oman with their IUCN conservation categories with a list of the endemic, venomous and insular species.

**(S105-S116: Species list by governorate)** Map of the 11 governorates of Oman with the checklist of all the terrestrial reptile species present in the governorate with their IUCN conservation categories and with a list of the endemic, venomous and insular species.

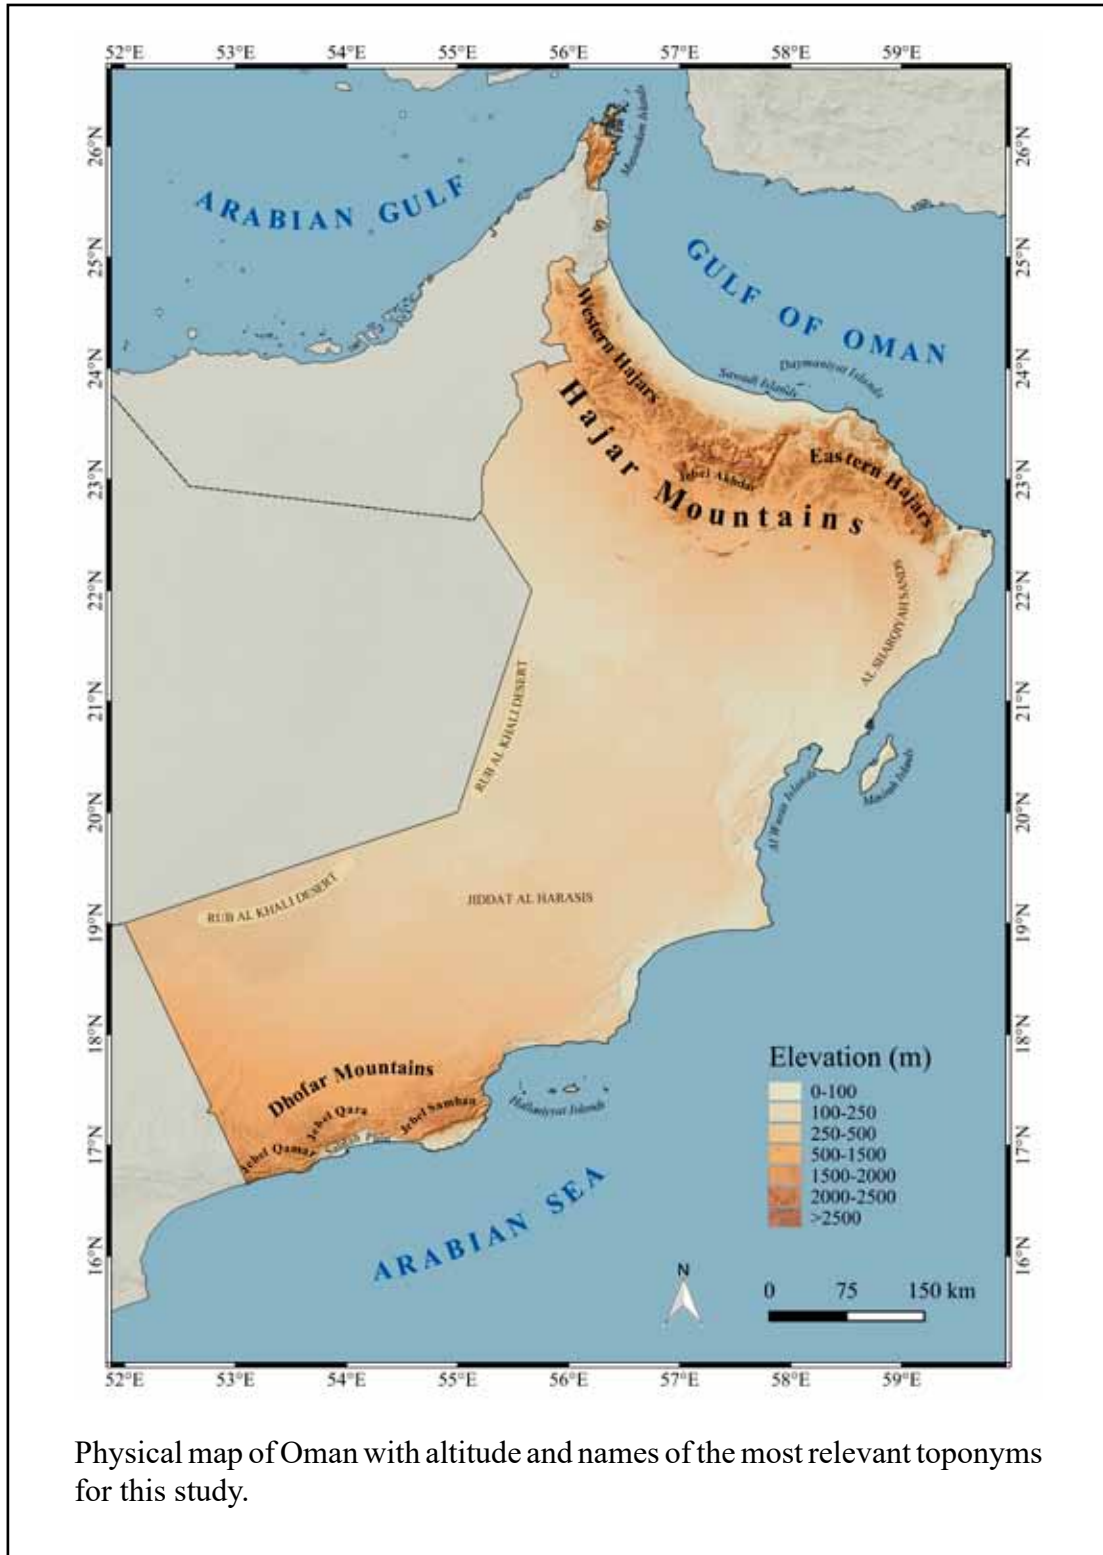

Physical map of Oman with altitude and names of the most relevant toponyms for this study.

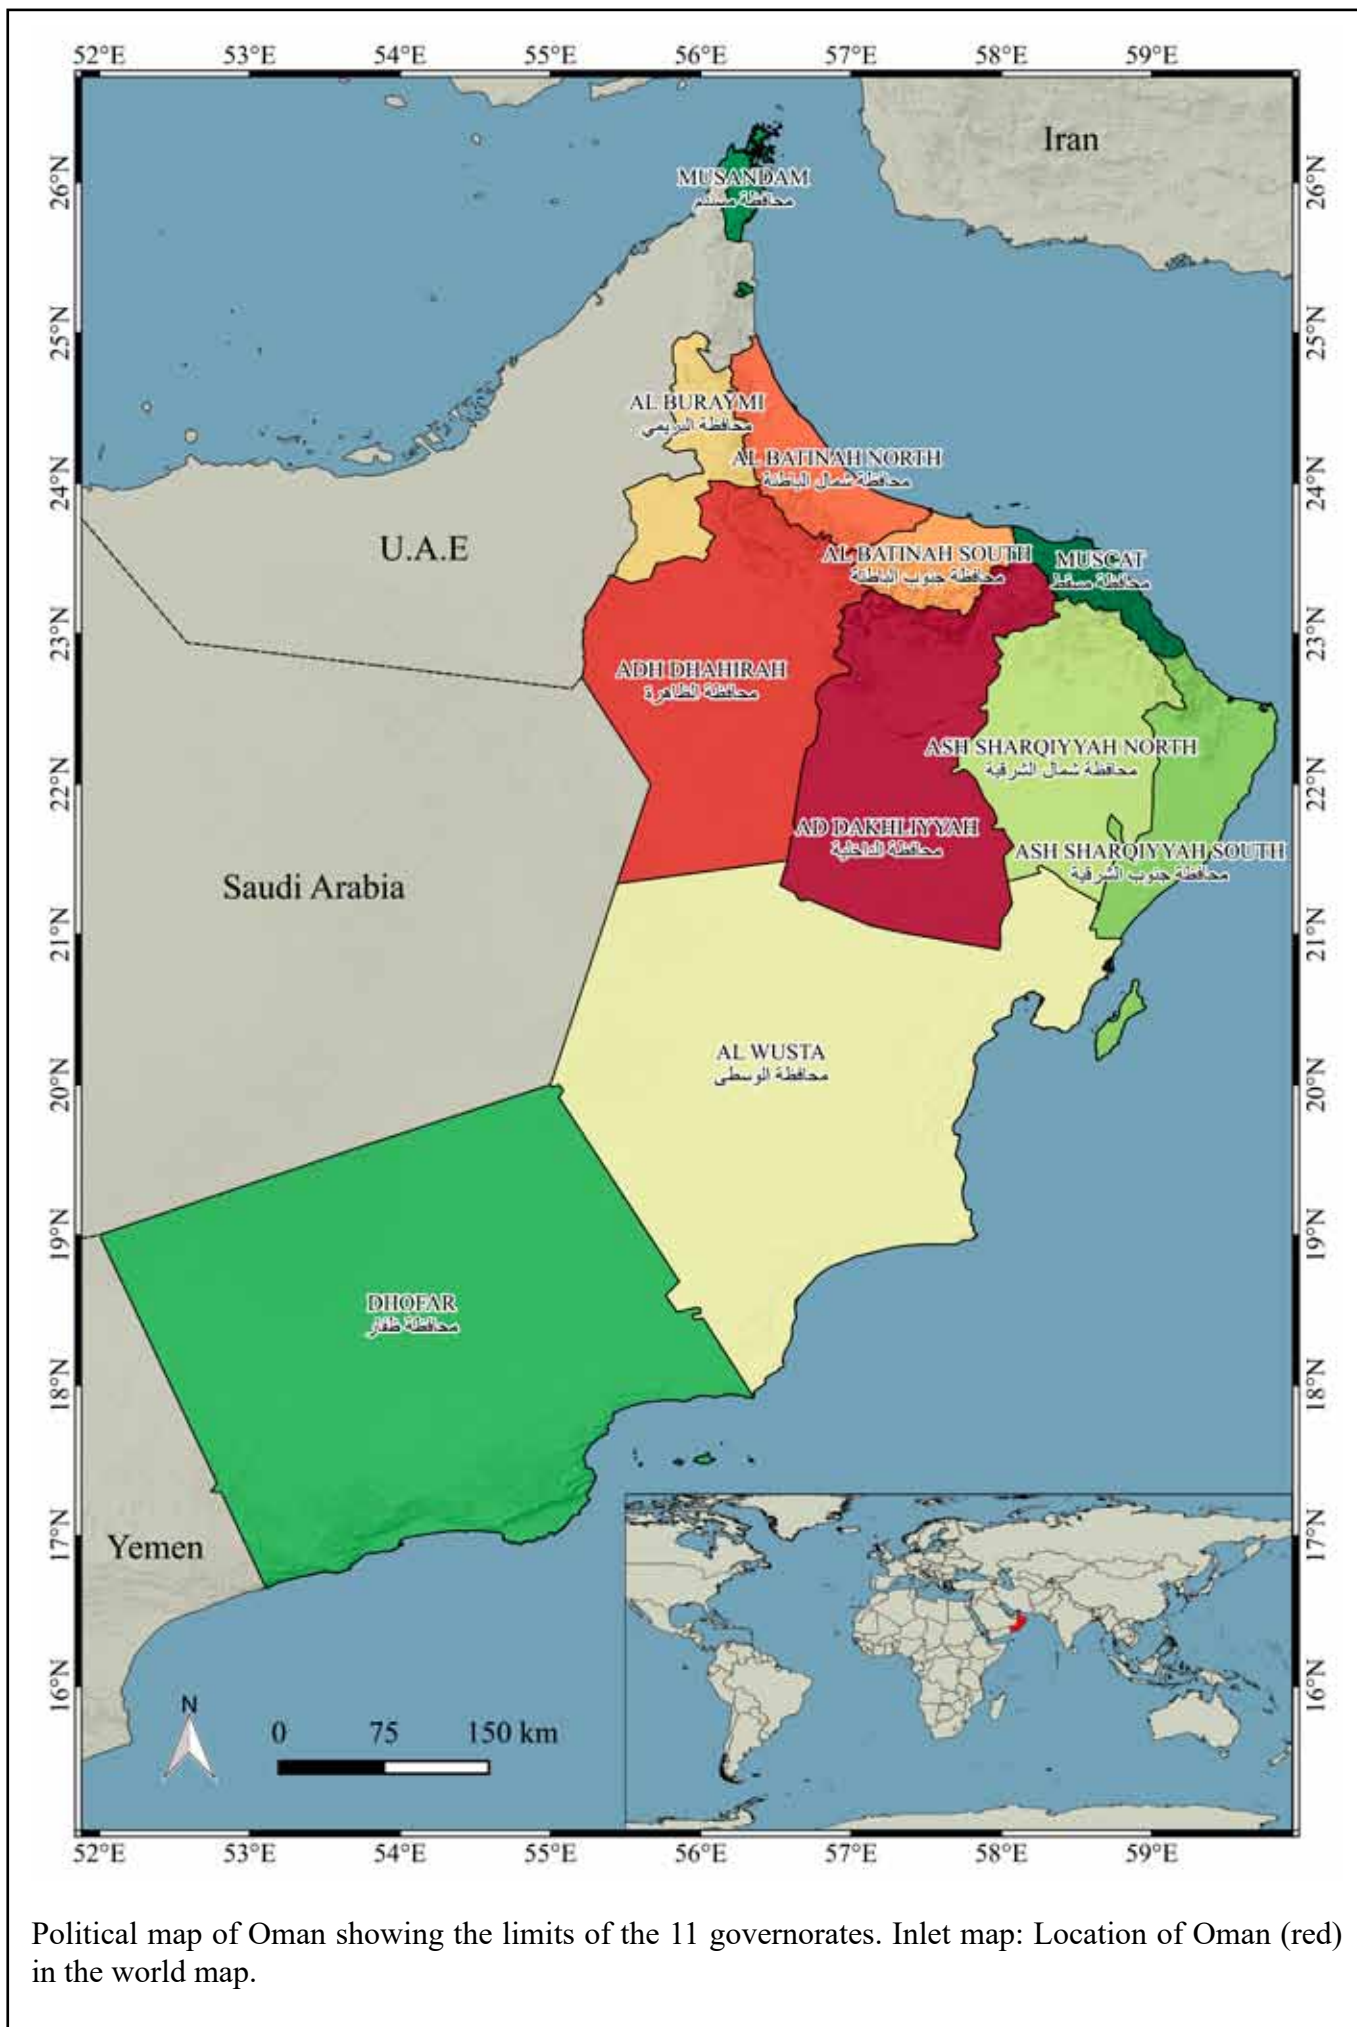

Political map of Oman showing the limits of the 11 governorates. Inlet map: Location of Oman (red) in the world map.

## Oman

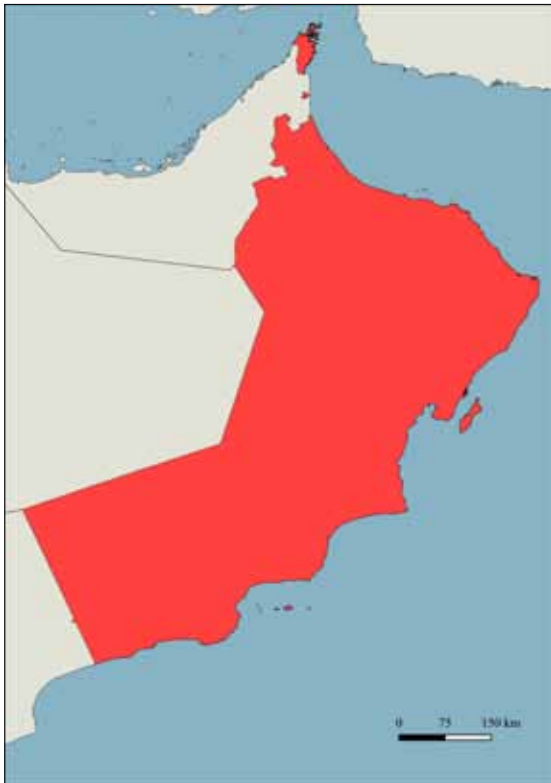

| IUCN categories |                                         | Total     |
|-----------------|-----------------------------------------|-----------|
| Taxa            | Family/Specie                           |           |
| <b>Lizards</b>  |                                         | <b>80</b> |
| <b>Agamids</b>  |                                         | <b>13</b> |
|                 | <b>Agamidae</b>                         |           |
|                 | <i>Acanthocercus adramitanus</i>        | LC        |
|                 | <i>Calotes versicolor</i>               | LC*       |
|                 | <i>Phrynocephalus arabicus</i>          | LC        |
|                 | <i>Phrynocephalus maculatus</i>         | LC*       |
|                 | <i>Phrynocephalus sakoi</i>             | NE        |
|                 | <i>Pseudotrapelus dhofarensis</i>       | NE        |
|                 | <i>Pseudotrapelus jensvindumi</i>       | NE        |
|                 | <i>Trapelus flavimaculatus</i>          | LC        |
|                 | <i>Uromastyx aegyptia lepteni</i>       | VU        |
|                 | <i>Uromastyx aegyptia microlepis</i>    | VU        |
|                 | <i>Uromastyx benti</i>                  | LC        |
|                 | <i>Uromastyx thomasi</i>                | VU        |
|                 | <b>Chamaeleonidae</b>                   |           |
|                 | <i>Chamaeleo arabicus</i>               | LC        |
| <b>Geckos</b>   |                                         | <b>45</b> |
|                 | <b>Gekkonidae</b>                       |           |
|                 | <i>Bunopus tuberculatus</i>             | LC        |
|                 | <i>Cyrtopodion scabrum</i>              | LC        |
|                 | <i>Hemidactylus alkiumii</i>            | NE        |
|                 | <i>Hemidactylus endophis</i>            | NE        |
|                 | <i>Hemidactylus festivus</i>            | NE        |
|                 | <i>Hemidactylus flaviviridis</i>        | LC*       |
|                 | <i>Hemidactylus hajarensis</i>          | NE        |
|                 | <i>Hemidactylus inexpectatus</i>        | NE        |
|                 | <i>Hemidactylus lemuringus</i>          | DD        |
|                 | <i>Hemidactylus leschenaultii</i>       | LC*       |
|                 | <i>Hemidactylus luqueorum</i>           | NE        |
|                 | <i>Hemidactylus masirahensis</i>        | NE        |
|                 | <i>Hemidactylus minutus</i>             | NE        |
|                 | <i>Hemidactylus paucituberculatus</i>   | NE        |
|                 | <i>Hemidactylus persicus</i>            | LC*       |
|                 | <i>Hemidactylus robustus</i>            | LC*       |
|                 | <i>Hemidactylus sp.</i>                 | NE        |
|                 | <i>Pseudoceramodactylus khobarensis</i> | LC        |
|                 | <i>Stenodactylus arabicus</i>           | LC        |
|                 | <i>Stenodactylus doriae</i>             | LC        |
|                 | <i>Stenodactylus leptocymbotes</i>      | LC*       |
|                 | <i>Stenodactylus sharqiyahensis</i>     | NE        |
|                 | <i>Trachydactylus hajarensis</i>        | NE        |
|                 | <i>Trachydactylus spatulurus</i>        | NE        |
|                 | <i>Tropicolotes scortecii</i>           | LC        |
|                 | <i>Tropicolotes sp.</i>                 | NE        |

| Phyllodactylidae                    |    |
|-------------------------------------|----|
| <i>Asaccus gallagheri</i>           | NE |
| <i>Asaccus gardneri</i>             | NE |
| <i>Asaccus margaritae</i>           | NE |
| <i>Asaccus montanus</i>             | VU |
| <i>Asaccus platyrhynchus</i>        | LC |
| <i>Asaccus arnoldi</i>              | NE |
| <i>Ptyodactylus dhofarensis</i>     | NE |
| <i>Ptyodactylus orlovi</i>          | NE |
| <i>Ptyodactylus ruusaljibalicus</i> | NE |

| Sphaerodactylidae                    |    |
|--------------------------------------|----|
| <i>Pristurus carteri</i>             | LC |
| <i>Pristurus celerrimus</i>          | LC |
| <i>Pristurus gallagheri</i>          | NT |
| <i>Pristurus minimus</i>             | LC |
| <i>Pristurus rupestris rupestris</i> | NE |
| <i>Pristurus sp. 1</i>               | NE |
| <i>Pristurus sp. 2</i>               | NE |
| <i>Pristurus sp. 3</i>               | NE |
| <i>Pristurus sp. 4</i>               | NE |
| <i>Pristurus sp. 5</i>               | NE |

**Lacertids 13**

| Lacertidae                        |     |
|-----------------------------------|-----|
| <i>Acanthodactylus blanfordii</i> | LC* |
| <i>Acanthodactylus boskianus</i>  | LC* |
| <i>Acanthodactylus felicitis</i>  | VU  |
| <i>Acanthodactylus haasi</i>      | LC  |
| <i>Acanthodactylus masirae</i>    | DD  |
| <i>Acanthodactylus opheodurus</i> | LC  |
| <i>Acanthodactylus schmidti</i>   | LC  |
| <i>Mesalina adramitana</i>        | LC  |
| <i>Mesalina ayunensis</i>         | DD  |
| <i>Mesalina sp. 1</i>             | NE  |
| <i>Mesalina sp. 2</i>             | NE  |
| <i>Omanosaura cyanura</i>         | LC  |
| <i>Omanosaura jayakari</i>        | LC  |

**Skinks 7**

| Scincidae                            |     |
|--------------------------------------|-----|
| <i>Ablepharus pannonicus</i>         | LC* |
| <i>Chalcides ocellatus ocellatus</i> | LC* |
| <i>Heremites septemtaeniatus</i>     | LC* |
| <i>Scincus mitranus</i>              | LC  |
| <i>Scincus scincus conirostris</i>   | LC* |
| <i>Trachylepis brevicollis</i>       | LC* |
| <i>Trachylepis tessellata</i>        | LC  |

**Amphisbaenids 1**

| Trogonophidae                |    |
|------------------------------|----|
| <i>Diplometopon zarudnyi</i> | LC |

**Varanids 1**

| Varanidae              |     |
|------------------------|-----|
| <i>Varanus griseus</i> | LC* |

**Snakes 21**

| Boidae               |    |
|----------------------|----|
| <i>Eryx jayakari</i> | LC |

| Colubridae                               |     |
|------------------------------------------|-----|
| <i>Lytrochynchus diadema diadema</i>     | LC  |
| <i>Platyceps rhodorachis rhodorachis</i> | LC* |
| <i>Platyceps thomasi</i>                 | DD  |
| <i>Rhynchocalamus arabicus</i>           | DD  |
| <i>Spalerosophis diadema cliffordii</i>  | LC* |
| <i>Telescopus dhara dhara</i>            | LC* |

| Elapidae            |    |
|---------------------|----|
| <i>Naja arabica</i> | LC |

| Lamprophiidae                 |     |
|-------------------------------|-----|
| <i>Atractaspis andersonii</i> | LC  |
| <i>Psammophis schokari</i>    | LC* |
| <i>Rhagerhis moilensis</i>    | LC* |

| Leptotyphlopidae                |     |
|---------------------------------|-----|
| <i>Myriopholis macrorhyncha</i> | LC* |
| <i>Myriopholis nurstii</i>      | LC* |

| Typhlopidae                  |     |
|------------------------------|-----|
| <i>Indotyphlops braminus</i> | LC* |

| Viperidae                               |     |
|-----------------------------------------|-----|
| <i>Bitis arietans</i>                   | LC* |
| <i>Cerastes gasperettii gasperettii</i> | LC  |
| <i>Echis carinatus sochureki</i>        | LC* |
| <i>Echis coloratus</i>                  | LC* |
| <i>Echis khosatzkii</i>                 | LC  |
| <i>Echis omanensis</i>                  | LC  |
| <i>Pseudocerastes persicus</i>          | LC  |

\* Not available on the web

## S104: Species list of Oman

## Oman

| Venomous species |                                         |       |
|------------------|-----------------------------------------|-------|
| Taxa             | Family/Specie                           | Total |
| Lizards          |                                         | 0     |
| Snakes           |                                         | 9     |
|                  | Elapidae                                |       |
|                  | <i>Naja arabica</i>                     |       |
|                  | Lamprophiidae                           |       |
|                  | <i>Atractaspis andersonii</i>           |       |
|                  | Viperidae                               |       |
|                  | <i>Bitis arietans</i>                   |       |
|                  | <i>Cerastes gasperettii gasperettii</i> |       |
|                  | <i>Echis carinatus sochureki</i>        |       |
|                  | <i>Echis coloratus</i>                  |       |
|                  | <i>Echis khosatzkii</i>                 |       |
|                  | <i>Echis omanensis</i>                  |       |
|                  | <i>Pseudocerastes persicus</i>          |       |

| Insular species |                                          |       |
|-----------------|------------------------------------------|-------|
| Taxa            | Family/Specie                            | Total |
| Lizards         |                                          | 23    |
| Agamids         |                                          | 3     |
|                 | Agamidae                                 |       |
|                 | <i>Pseudotrapelus dhofarensis</i>        |       |
|                 | <i>Uromastyx thomasi</i>                 |       |
|                 | Chamaeleonidae                           |       |
|                 | <i>Chamaeleo arabicus</i>                |       |
| Geckos          |                                          | 14    |
|                 | Gekkonidae                               |       |
|                 | <i>Hemidactylus alkiyumii</i>            |       |
|                 | <i>Hemidactylus inexpectatus</i>         |       |
|                 | <i>Hemidactylus masirahensis</i>         |       |
|                 | <i>Hemidactylus paucituberculatus</i>    |       |
|                 | <i>Hemidactylus robustus</i>             |       |
|                 | <i>Stenodactylus leptosymbotes</i>       |       |
|                 | <i>Trachydactylus hajarensis</i>         |       |
|                 | <i>Tropicolotes scortecci</i>            |       |
|                 | Phyllodactylidae                         |       |
|                 | <i>Ptyodactylus rusaljibalicus</i>       |       |
|                 | Sphaerodactylidae                        |       |
|                 | <i>Pristurus carteri</i>                 |       |
|                 | <i>Pristurus celerrimus</i>              |       |
|                 | <i>Pristurus minimus</i>                 |       |
|                 | <i>Pristurus rupestris rupestris</i>     |       |
|                 | <i>Pristurus</i> sp. 1                   |       |
| Lacertids       |                                          | 2     |
|                 | Lacertidae                               |       |
|                 | <i>Acanthodactylus masirae</i>           |       |
|                 | <i>Mesalina adramitana</i>               |       |
| Skinks          |                                          | 4     |
|                 | Scincidae                                |       |
|                 | <i>Chalcides ocellatus ocellatus</i>     |       |
|                 | <i>Heremites septemtaeniatus</i>         |       |
|                 | <i>Scincus mitranus</i>                  |       |
|                 | <i>Trachylepis tessellata</i>            |       |
| Snakes          |                                          | 6     |
|                 | Colubridae                               |       |
|                 | <i>Platyceps rhodorachis rhodorachis</i> |       |
|                 | <i>Spalerosophis diadema cliffordii</i>  |       |
|                 | <i>Telescopus dhara dhara</i>            |       |
|                 | Lamprophiidae                            |       |
|                 | <i>Psammophis schokari</i>               |       |
|                 | <i>Rhagerhis moilensis</i>               |       |
|                 | Viperidae                                |       |
|                 | <i>Echis carinatus sochureki</i>         |       |

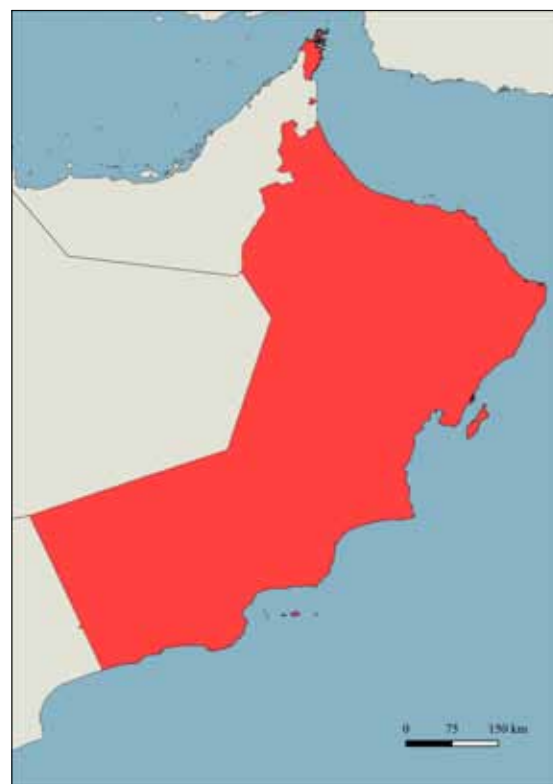

| Endemic species |                                       |       |
|-----------------|---------------------------------------|-------|
| Taxa            | Family/Specie                         | Total |
| Lizards         |                                       | 20    |
| Agamids         |                                       | 2     |
|                 | Agamidae                              |       |
|                 | <i>Phrynocephalus sakoi</i>           |       |
|                 | <i>Uromastyx thomasi</i>              |       |
| Geckos          |                                       | 16    |
|                 | Gekkonidae                            |       |
|                 | <i>Hemidactylus endophis</i>          |       |
|                 | <i>Hemidactylus hajarensis</i>        |       |
|                 | <i>Hemidactylus inexpectatus</i>      |       |
|                 | <i>Hemidactylus luqueorum</i>         |       |
|                 | <i>Hemidactylus masirahensis</i>      |       |
|                 | <i>Hemidactylus paucituberculatus</i> |       |
|                 | <i>Hemidactylus</i> sp.               |       |
|                 | <i>Stenodactylus sharqiyahensis</i>   |       |
|                 | <i>Tropicolotes</i> sp.               |       |
|                 | Phyllodactylidae                      |       |
|                 | <i>Asaccus montanus</i>               |       |
|                 | <i>Asaccus platyrhynchus</i>          |       |
|                 | <i>Asaccus arnoldi</i>                |       |
|                 | Sphaerodactylidae                     |       |
|                 | <i>Pristurus gallagheri</i>           |       |
|                 | <i>Pristurus</i> sp. 2                |       |
|                 | <i>Pristurus</i> sp. 4                |       |
|                 | <i>Pristurus</i> sp. 5                |       |
| Lacertids       |                                       | 2     |
|                 | Lacertidae                            |       |
|                 | <i>Acanthodactylus masirae</i>        |       |
|                 | <i>Mesalina</i> sp. 2                 |       |
| Snakes          |                                       | 0     |

### Musandam Governorate

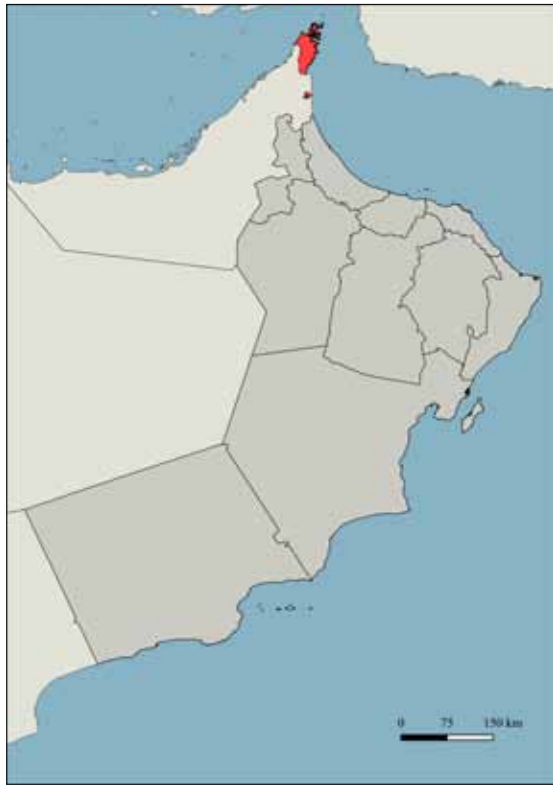

### S105: Species list by governorate

| IUCN categories  |                                          |           |
|------------------|------------------------------------------|-----------|
| Taxa             | Family/Specie                            | Total     |
| <b>Lizards</b>   |                                          | <b>15</b> |
| <b>Agamids</b>   |                                          | <b>1</b>  |
|                  | Agamidae                                 |           |
|                  | <i>Pseudotrapelus jensvindumi</i>        | NE        |
| <b>Geckos</b>    |                                          | <b>10</b> |
|                  | Gekkonidae                               |           |
|                  | <i>Cyrtopodion scabrum</i>               | LC        |
|                  | <i>Hemidactylus flaviviridis</i>         | LC*       |
|                  | <i>Hemidactylus robustus</i>             | LC*       |
|                  | <i>Trachydactylus hajarensis</i>         | NE        |
|                  | Phyllodactylidae                         |           |
|                  | <i>Asaccus gallagheri</i>                | NE        |
|                  | <i>Asaccus gardneri</i>                  | NE        |
|                  | <i>Asaccus margaritae</i>                | NE        |
|                  | <i>Ptyodactylus ruusaljibalicus</i>      | NE        |
|                  | Sphaerodactylidae                        |           |
|                  | <i>Pristurus celerrimus</i>              | LC        |
|                  | <i>Pristurus</i> sp. 3                   | NE        |
| <b>Lacertids</b> |                                          | <b>2</b>  |
|                  | Lacertidae                               |           |
|                  | <i>Omanosaura cyanura</i>                | LC        |
|                  | <i>Omanosaura jayakari</i>               | LC        |
| <b>Skinks</b>    |                                          | <b>2</b>  |
|                  | Scincidae                                |           |
|                  | <i>Chalcides ocellatus ocellatus</i>     | LC*       |
|                  | <i>Trachylepis tessellata</i>            | LC        |
| <b>Snakes</b>    |                                          | <b>5</b>  |
|                  | Colubridae                               |           |
|                  | <i>Platyceps rhodorachis rhodorachis</i> | LC*       |
|                  | <i>Telescopus dhara dhara</i>            | LC*       |
|                  | Lamprophiidae                            |           |
|                  | <i>Psammophis schokari</i>               | LC*       |
|                  | Viperidae                                |           |
|                  | <i>Echis omanensis</i>                   | LC        |
|                  | <i>Pseudocerastes persicus</i>           | LC        |

\* Not available on the web

| Venomous species |                                |          |
|------------------|--------------------------------|----------|
| Taxa             | Family/Specie                  | Total    |
| <b>Lizards</b>   |                                | <b>0</b> |
| <b>Snakes</b>    |                                | <b>2</b> |
|                  | Viperidae                      |          |
|                  | <i>Echis omanensis</i>         |          |
|                  | <i>Pseudocerastes persicus</i> |          |

| Species of Musandam Islands |                                     |          |
|-----------------------------|-------------------------------------|----------|
| Taxa                        | Family/Specie                       | Total    |
| <b>Lizards</b>              |                                     | <b>3</b> |
| <b>Geckos</b>               |                                     | <b>3</b> |
|                             | Gekkonidae                          |          |
|                             | <i>Hemidactylus robustus</i>        |          |
|                             | Phyllodactylidae                    |          |
|                             | <i>Ptyodactylus ruusaljibalicus</i> |          |
|                             | Sphaerodactylidae                   |          |
|                             | <i>Pristurus celerrimus</i>         |          |
| <b>Snakes</b>               |                                     | <b>0</b> |



## S106: Species list by governorate

| IUCN categories      |                                              |           |
|----------------------|----------------------------------------------|-----------|
| Taxa                 | Family/Specie                                | Total     |
| <b>Lizards</b>       |                                              | <b>24</b> |
| <b>Agamids</b>       |                                              | <b>4</b>  |
|                      | Agamidae                                     |           |
|                      | <i>Phrynocephalus arabicus</i>               | LC        |
|                      | <i>Pseudotrapelus jensvindumi</i>            | NE        |
|                      | <i>Trapelus flavimaculatus</i>               | LC        |
|                      | <i>Uromastix aegyptia leptieni</i>           | VU        |
| <b>Geckos</b>        |                                              | <b>11</b> |
|                      | Gekkonidae                                   |           |
|                      | <i>Bunopus tuberculatus</i>                  | LC        |
|                      | <i>Hemidactylus persicus</i>                 | LC*       |
|                      | <i>Hemidactylus robustus</i>                 | LC*       |
|                      | <i>Stenodactylus arabicus</i>                | LC        |
|                      | <i>Stenodactylus doriae</i>                  | LC        |
|                      | <i>Stenodactylus leptocymbotes</i>           | LC*       |
|                      | <i>Trachydactylus hajarensis</i>             | NE        |
|                      | Phyllodactylidae                             |           |
|                      | <i>Ptyodactylus orlovi</i>                   | NE        |
|                      | Sphaerodactylidae                            |           |
|                      | <i>Pristurus carteri</i>                     | LC        |
|                      | <i>Pristurus celerrimus</i>                  | LC        |
|                      | <i>Pristurus</i> sp. 3                       | NE        |
| <b>Lacertids</b>     |                                              | <b>5</b>  |
|                      | Lacertidae                                   |           |
|                      | <i>Acanthodactylus boskianus</i>             | LC*       |
|                      | <i>Acanthodactylus schmidti</i>              | LC        |
|                      | <i>Mesalina adramitana</i>                   | LC        |
|                      | <i>Omanosaura cyanura</i>                    | LC        |
|                      | <i>Omanosaura jayakari</i>                   | LC        |
| <b>Skinks</b>        |                                              | <b>3</b>  |
|                      | Scincidae                                    |           |
|                      | <i>Ablepharus pannonicus</i>                 | LC*       |
|                      | <i>Scincus mitranus</i>                      | LC        |
|                      | <i>Trachylepis tessellata</i>                | LC        |
| <b>Amphisbaenids</b> |                                              | <b>1</b>  |
|                      | Trogonophidae                                |           |
|                      | <i>Diplometopon zarudnyi</i>                 | LC        |
| <b>Snakes</b>        |                                              | <b>4</b>  |
|                      | Boidae                                       |           |
|                      | <i>Eryx jayakari</i>                         | LC        |
|                      | Colubridae                                   |           |
|                      | <i>Platycephalus rhodorachis rhodorachis</i> | LC*       |
|                      | Lamprophiidae                                |           |
|                      | <i>Psammophis schokari</i>                   | LC*       |
|                      | Viperidae                                    |           |
|                      | <i>Echis omanensis</i>                       | LC        |

\* Not available on the web

## Al Buraymi Governorate

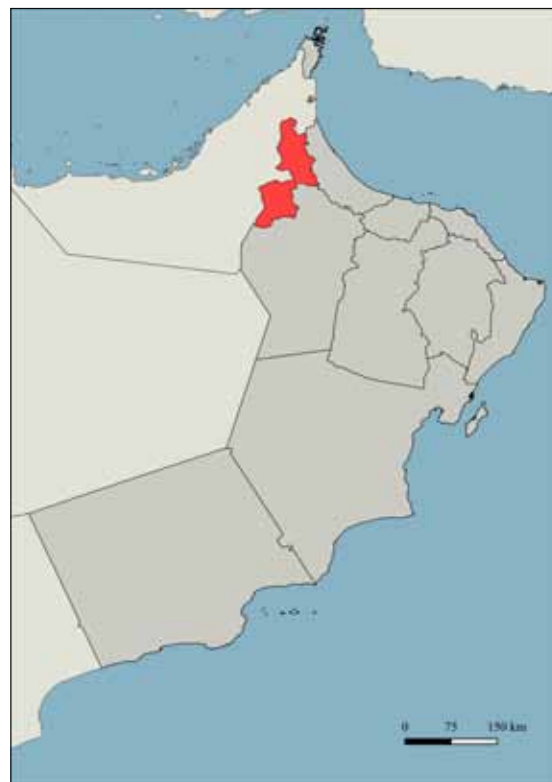

| Venomous species |                        |          |
|------------------|------------------------|----------|
| Taxa             | Family/Specie          | Total    |
| <b>Lizards</b>   |                        | <b>0</b> |
| <b>Snakes</b>    |                        | <b>1</b> |
|                  | <i>Echis omanensis</i> |          |

## Al Batinah North Governorate

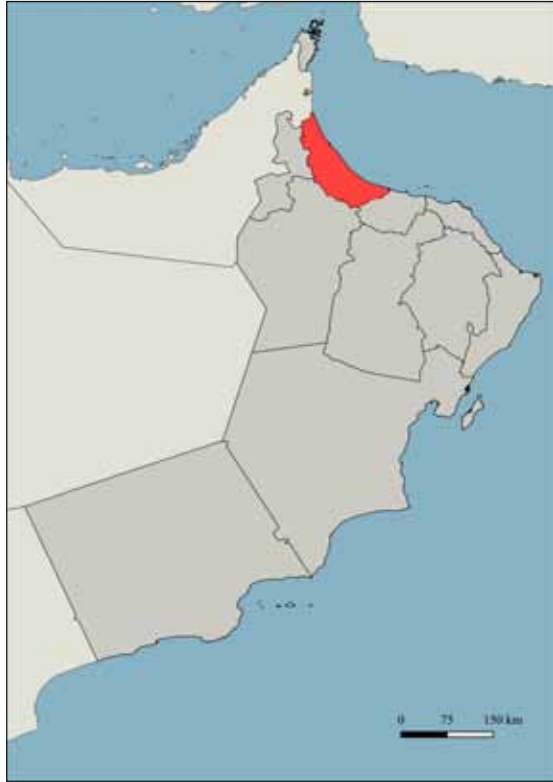

| Venomous species |                                  |       |
|------------------|----------------------------------|-------|
| Taxa             | Family/Specie                    | Total |
| Lizards          |                                  | 0     |
| Snakes           |                                  | 2     |
|                  | Viperidae                        |       |
|                  | <i>Echis carinatus sochureki</i> |       |
|                  | <i>Echis omanensis</i>           |       |

## S107: Species list by governorate

| IUCN categories  |                                          |           |
|------------------|------------------------------------------|-----------|
| Taxa             | Family/Specie                            | Total     |
| <b>Lizards</b>   |                                          | <b>20</b> |
| <b>Agamids</b>   |                                          | <b>2</b>  |
|                  | Agamidae                                 |           |
|                  | <i>Pseudotrapelus jensvindumi</i>        | NE        |
|                  | <i>Trapelus flavimaculatus</i>           | LC        |
| <b>Geckos</b>    |                                          | <b>10</b> |
|                  | Gekkonidae                               |           |
|                  | <i>Bunopus tuberculatus</i>              | LC        |
|                  | <i>Hemidactylus flaviviridis</i>         | LC*       |
|                  | <i>Hemidactylus robustus</i>             | LC*       |
|                  | <i>Stenodactylus leptocosymbotes</i>     | LC*       |
|                  | <i>Trachydactylus hajarensis</i>         | NE        |
|                  | Phyllodactylidae                         |           |
|                  | <i>Asaccus gallagheri</i>                | NE        |
|                  | <i>Ptyodactylus orlovi</i>               | NE        |
|                  | Sphaerodactylidae                        |           |
|                  | <i>Pristurus celerrimus</i>              | LC        |
|                  | <i>Pristurus rupestris rupestris</i>     | NE        |
|                  | <i>Pristurus</i> sp. 3                   | NE        |
| <b>Lacertids</b> |                                          | <b>5</b>  |
|                  | Lacertidae                               |           |
|                  | <i>Acanthodactylus blanfordii</i>        | LC*       |
|                  | <i>Acanthodactylus opheodurus</i>        | LC        |
|                  | <i>Mesalina adramitana</i>               | LC        |
|                  | <i>Omanosaura cyanura</i>                | LC        |
|                  | <i>Omanosaura jayakari</i>               | LC        |
| <b>Skinks</b>    |                                          | <b>2</b>  |
|                  | Scincidae                                |           |
|                  | <i>Chalcides ocellatus ocellatus</i>     | LC*       |
|                  | <i>Trachylepis tessellata</i>            | LC        |
| <b>Varanids</b>  |                                          | <b>1</b>  |
|                  | Varanidae                                |           |
|                  | <i>Varanus griseus</i>                   | LC*       |
| <b>Snakes</b>    |                                          | <b>8</b>  |
|                  | Boidae                                   |           |
|                  | <i>Eryx jayakari</i>                     | LC        |
|                  | Colubridae                               |           |
|                  | <i>Lytorhynchus diadema diadema</i>      | LC        |
|                  | <i>Platyceps rhodorachis rhodorachis</i> | LC*       |
|                  | <i>Spalerosophis diadema cliffordii</i>  | LC*       |
|                  | Lamprophiidae                            |           |
|                  | <i>Psammophis schokari</i>               | LC*       |
|                  | <i>Rhagerhis moilensis</i>               | LC*       |
|                  | Viperidae                                |           |
|                  | <i>Echis carinatus sochureki</i>         | LC*       |
|                  | <i>Echis omanensis</i>                   | LC        |

\* Not available on the web

## S108: Species list by governorate

| IUCN categories  |                                          |           |
|------------------|------------------------------------------|-----------|
| Taxa             | Family/Specie                            | Total     |
| <b>Lizards</b>   |                                          | <b>29</b> |
| <b>Agamids</b>   |                                          | <b>3</b>  |
|                  | Agamidae                                 |           |
|                  | <i>Pseudotrapelus jensvindumi</i>        | NE        |
|                  | <i>Trapelus flavimaculatus</i>           | LC        |
|                  | <i>Uromastyx aegyptia lepteni</i>        | VU        |
| <b>Geckos</b>    |                                          | <b>16</b> |
|                  | Gekkonidae                               |           |
|                  | <i>Bunopus tuberculatus</i>              | LC        |
|                  | <i>Hemidactylus flaviviridis</i>         | LC*       |
|                  | <i>Hemidactylus hajarensis</i>           | NE        |
|                  | <i>Hemidactylus leschenaultii</i>        | LC*       |
|                  | <i>Hemidactylus luqueorum</i>            | NE        |
|                  | <i>Hemidactylus robustus</i>             | LC*       |
|                  | <i>Stenodactylus leptocymbotes</i>       | LC*       |
|                  | <i>Trachydactylus hajarensis</i>         | NE        |
|                  | Phyllodactylidae                         |           |
|                  | <i>Asaccus gallagheri</i>                | NE        |
|                  | <i>Asaccus platyrhynchus</i>             | LC        |
|                  | <i>Ptyodactylus orlovi</i>               | NE        |
|                  | Sphaerodactylidae                        |           |
|                  | <i>Pristurus carteri</i>                 | LC        |
|                  | <i>Pristurus celerrimus</i>              | LC        |
|                  | <i>Pristurus gallagheri</i>              | NT        |
|                  | <i>Pristurus rupestris rupestris</i>     | NE        |
|                  | <i>Pristurus</i> sp. 3                   | NE        |
| <b>Lacertids</b> |                                          | <b>4</b>  |
|                  | Lacertidae                               |           |
|                  | <i>Acanthodactylus blanfordii</i>        | LC*       |
|                  | <i>Mesalina adramitana</i>               | LC        |
|                  | <i>Omanosaura cyanura</i>                | LC        |
|                  | <i>Omanosaura jayakari</i>               | LC        |
| <b>Skinks</b>    |                                          | <b>5</b>  |
|                  | Scincidae                                |           |
|                  | <i>Ablepharus panmonicus</i>             | LC*       |
|                  | <i>Chalcides ocellatus ocellatus</i>     | LC*       |
|                  | <i>Heremites septemtaeniatus</i>         | LC*       |
|                  | <i>Scincus mitranus</i>                  | LC        |
|                  | <i>Trachylepis tessellata</i>            | LC        |
| <b>Varanids</b>  |                                          | <b>1</b>  |
|                  | Varanidae                                |           |
|                  | <i>Varanus griseus</i>                   | LC*       |
| <b>Snakes</b>    |                                          | <b>11</b> |
|                  | Boidae                                   |           |
|                  | <i>Eryx jayakari</i>                     | LC        |
|                  | Colubridae                               |           |
|                  | <i>Platyceps rhodorachis rhodorachis</i> | LC*       |
|                  | <i>Spalerosophis diadema cliffordii</i>  | LC*       |
|                  | <i>Telescopus dhara dhara</i>            | LC*       |
|                  | Lamprophiidae                            |           |
|                  | <i>Psammophis schokari</i>               | LC*       |
|                  | <i>Rhagerhis moilensis</i>               | LC*       |
|                  | Leptotyphlopidae                         |           |
|                  | <i>Myriopholis macrorhyncha</i>          | LC*       |
|                  | Typhlopidae                              |           |
|                  | <i>Indotyphlops braminus</i>             | LC*       |
|                  | Viperidae                                |           |
|                  | <i>Echis carinatus sochureki</i>         | LC*       |
|                  | <i>Echis omanensis</i>                   | LC        |
|                  | <i>Pseudocerastes persicus</i>           | LC        |

\* Not available on the web

| Endemic species |                                |          |
|-----------------|--------------------------------|----------|
| Taxa            | Family/Specie                  | Total    |
| <b>Lizards</b>  |                                | <b>4</b> |
| <b>Geckos</b>   |                                | <b>4</b> |
|                 | Gekkonidae                     |          |
|                 | <i>Hemidactylus hajarensis</i> |          |
|                 | <i>Hemidactylus luqueorum</i>  |          |
|                 | Phyllodactylidae               |          |
|                 | <i>Asaccus platyrhynchus</i>   |          |
|                 | Sphaerodactylidae              |          |
|                 | <i>Pristurus gallagheri</i>    |          |
| <b>Snakes</b>   |                                | <b>0</b> |

## Al Batinah South Governorate

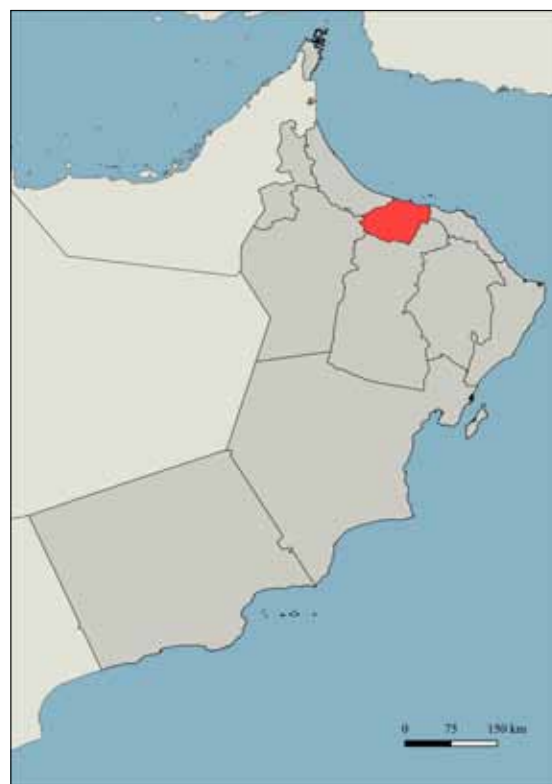

| Venomous species |                                  |          |
|------------------|----------------------------------|----------|
| Taxa             | Family/Specie                    | Total    |
| <b>Lizards</b>   |                                  | <b>0</b> |
| <b>Snakes</b>    |                                  | <b>3</b> |
|                  | Viperidae                        |          |
|                  | <i>Echis carinatus sochureki</i> |          |
|                  | <i>Echis omanensis</i>           |          |
|                  | <i>Pseudocerastes persicus</i>   |          |

| Species of Daymaniyat Islands |                                          |          |
|-------------------------------|------------------------------------------|----------|
| Taxa                          | Family/Specie                            | Total    |
| <b>Lizards</b>                |                                          | <b>3</b> |
| <b>Geckos</b>                 |                                          | <b>2</b> |
|                               | Gekkonidae                               |          |
|                               | <i>Hemidactylus robustus</i>             |          |
|                               | Sphaerodactylidae                        |          |
|                               | <i>Pristurus rupestris rupestris</i>     |          |
| <b>Skinks</b>                 |                                          | <b>1</b> |
|                               | Scincidae                                |          |
|                               | <i>Heremites septemtaeniatus</i>         |          |
| <b>Snakes</b>                 |                                          | <b>1</b> |
|                               | Colubridae                               |          |
|                               | <i>Platyceps rhodorachis rhodorachis</i> |          |

| Species of Sawadi Islands |                                      |          |
|---------------------------|--------------------------------------|----------|
| Taxa                      | Family/Specie                        | Total    |
| <b>Lizards</b>            |                                      | <b>3</b> |
| <b>Geckos</b>             |                                      | <b>1</b> |
|                           | Sphaerodactylidae                    |          |
|                           | <i>Pristurus rupestris rupestris</i> |          |
| <b>Lacertids</b>          |                                      | <b>1</b> |
|                           | Lacertidae                           |          |
|                           | <i>Mesalina adramitana</i>           |          |
| <b>Skinks</b>             |                                      | <b>1</b> |
|                           | Scincidae                            |          |
|                           | <i>Chalcides ocellatus ocellatus</i> |          |
| <b>Snakes</b>             |                                      | <b>1</b> |
|                           | Viperidae                            |          |
|                           | <i>Echis carinatus sochureki</i>     |          |

## Adh Dhahirah Governorate

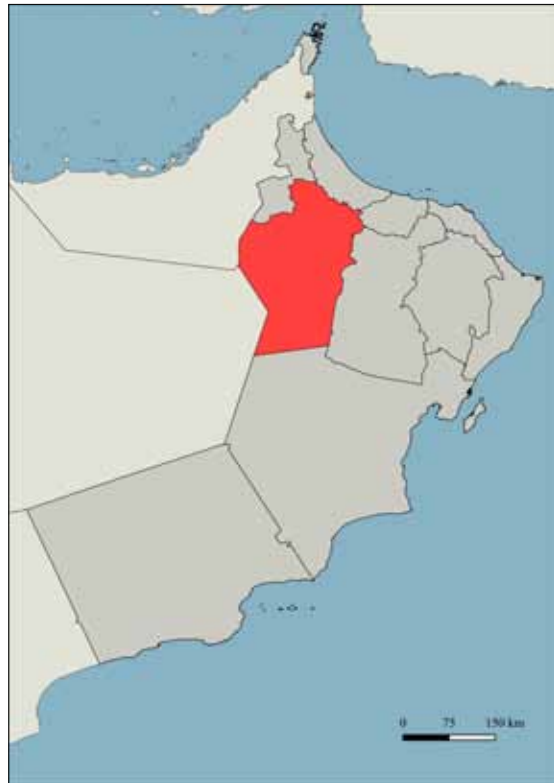

| Venomous species |                                  |       |
|------------------|----------------------------------|-------|
| Taxa             | Family/Specie                    | Total |
| Lizards          |                                  | 0     |
| Snakes           |                                  | 2     |
|                  | Viperidae                        |       |
|                  | <i>Echis carinatus sochureki</i> |       |
|                  | <i>Echis omanensis</i>           |       |

| Endemic species |                               |       |
|-----------------|-------------------------------|-------|
| Taxa            | Family/Specie                 | Total |
| Lizards         |                               | 3     |
| Geckos          |                               | 3     |
|                 | Gekkonidae                    |       |
|                 | <i>Hemidactylus luqueorum</i> |       |
|                 | Phyllodactylidae              |       |
|                 | <i>Asaccus montanus</i>       |       |
|                 | Sphaerodactylidae             |       |
|                 | <i>Pristurus</i> sp. 5        |       |
| Snakes          |                               | 0     |

## S109: Species list by governorate

| IUCN categories |                                          |       |
|-----------------|------------------------------------------|-------|
| Taxa            | Family/Specie                            | Total |
| Lizards         |                                          | 27    |
| Agamids         |                                          | 1     |
|                 | Agamidae                                 |       |
|                 | <i>Pseudotrapelus jensvindumi</i>        | NE    |
| Geckos          |                                          | 16    |
|                 | Gekkonidae                               |       |
|                 | <i>Bunopus tuberculatus</i>              | LC    |
|                 | <i>Hemidactylus flaviviridis</i>         | LC*   |
|                 | <i>Hemidactylus luqueorum</i>            | NE    |
|                 | <i>Stenodactylus arabicus</i>            | LC    |
|                 | <i>Stenodactylus doriae</i>              | LC    |
|                 | <i>Stenodactylus leptocosymbotes</i>     | LC*   |
|                 | <i>Trachydactylus hajarensis</i>         | NE    |
|                 | Phyllodactylidae                         |       |
|                 | <i>Asaccus gallagheri</i>                | NE    |
|                 | <i>Asaccus montanus</i>                  | VU    |
|                 | <i>Ptyodactylus orlovi</i>               | NE    |
|                 | Sphaerodactylidae                        |       |
|                 | <i>Pristurus carteri</i>                 | LC    |
|                 | <i>Pristurus celerrimus</i>              | LC    |
|                 | <i>Pristurus minimus</i>                 | LC    |
|                 | <i>Pristurus rupestris rupestris</i>     | NE    |
|                 | <i>Pristurus</i> sp. 3                   | NE    |
|                 | <i>Pristurus</i> sp. 5                   | NE    |
| Lacertids       |                                          | 5     |
|                 | Lacertidae                               |       |
|                 | <i>Acanthodactylus boskianus</i>         | LC*   |
|                 | <i>Acanthodactylus ophiodurus</i>        | LC    |
|                 | <i>Acanthodactylus schmidti</i>          | LC    |
|                 | <i>Mesalina adramitana</i>               | LC    |
|                 | <i>Omanosaura jayakari</i>               | LC    |
| Skinks          |                                          | 4     |
|                 | Scincidae                                |       |
|                 | <i>Ablepharus pannonicus</i>             | LC*   |
|                 | <i>Scincus mitranus</i>                  | LC    |
|                 | <i>Scincus scincus conirostris</i>       | LC*   |
|                 | <i>Trachylepis tessellata</i>            | LC    |
| Varanids        |                                          | 1     |
|                 | Varanidae                                |       |
|                 | <i>Varanus griseus</i>                   | LC*   |
| Snakes          |                                          | 6     |
|                 | Colubridae                               |       |
|                 | <i>Platyceps rhodorachis rhodorachis</i> | LC*   |
|                 | <i>Spalerosophis diadema cliffordii</i>  | LC*   |
|                 | Lamprophiidae                            |       |
|                 | <i>Psammophis schokari</i>               | LC*   |
|                 | <i>Rhagerhis moilensis</i>               | LC*   |
|                 | Viperidae                                |       |
|                 | <i>Echis carinatus sochureki</i>         | LC*   |
|                 | <i>Echis omanensis</i>                   | LC    |

\* Not available on the web

## S110: Species list by governorate

| IUCN categories  |                                          |           |
|------------------|------------------------------------------|-----------|
| Taxa             | Family/Specie                            | Total     |
| <b>Lizards</b>   |                                          | <b>35</b> |
| <b>Agamids</b>   |                                          | <b>5</b>  |
|                  | <b>Agamidae</b>                          |           |
|                  | <i>Pseudotrapelus dhofarensis</i>        | NE        |
|                  | <i>Pseudotrapelus jensvindumi</i>        | NE        |
|                  | <i>Trapelus flavimaculatus</i>           | LC        |
|                  | <i>Uromastyx aegyptia leptieni</i>       | VU        |
|                  | <i>Uromastyx aegyptia microlepis</i>     | VU        |
| <b>Geckos</b>    |                                          | <b>19</b> |
|                  | <b>Gekkonidae</b>                        |           |
|                  | <i>Bunopus tuberculatus</i>              | LC        |
|                  | <i>Cyrtopodion scabrum</i>               | LC        |
|                  | <i>Hemidactylus flaviviridis</i>         | LC*       |
|                  | <i>Hemidactylus hajarensis</i>           | NE        |
|                  | <i>Hemidactylus luqueorum</i>            | NE        |
|                  | <i>Hemidactylus robustus</i>             | LC*       |
|                  | <i>Stenodactylus leptocymbotes</i>       | LC*       |
|                  | <i>Trachydactylus hajarensis</i>         | NE        |
|                  | <b>Phyllodactylidae</b>                  |           |
|                  | <i>Asaccus gallagheri</i>                | NE        |
|                  | <i>Asaccus montanus</i>                  | VU        |
|                  | <i>Asaccus platyrhynchus</i>             | LC        |
|                  | <i>Ptyodactylus orlovi</i>               | NE        |
|                  | <b>Sphaerodactylidae</b>                 |           |
|                  | <i>Pristurus carteri</i>                 | LC        |
|                  | <i>Pristurus celerrimus</i>              | LC        |
|                  | <i>Pristurus gallagheri</i>              | NT        |
|                  | <i>Pristurus minimus</i>                 | LC        |
|                  | <i>Pristurus rupestris rupestris</i>     | NE        |
|                  | <i>Pristurus</i> sp. 3                   | NE        |
|                  | <i>Pristurus</i> sp. 5                   | NE        |
| <b>Lacertids</b> |                                          | <b>6</b>  |
|                  | <b>Lacertidae</b>                        |           |
|                  | <i>Acanthodactylus boskianus</i>         | LC*       |
|                  | <i>Acanthodactylus opheodurus</i>        | LC        |
|                  | <i>Acanthodactylus schmidti</i>          | LC        |
|                  | <i>Mesalina adramitana</i>               | LC        |
|                  | <i>Omanosaura cyanura</i>                | LC        |
|                  | <i>Omanosaura jayakari</i>               | LC        |
| <b>Skinks</b>    |                                          | <b>4</b>  |
|                  | <b>Scincidae</b>                         |           |
|                  | <i>Ablepharus pannonicus</i>             | LC*       |
|                  | <i>Chalcides ocellatus ocellatus</i>     | LC*       |
|                  | <i>Scincus mitranus</i>                  | LC        |
|                  | <i>Trachylepis tessellata</i>            | LC        |
| <b>Varanids</b>  |                                          | <b>1</b>  |
|                  | <b>Varanidae</b>                         |           |
|                  | <i>Varanus griseus</i>                   | LC*       |
| <b>Snakes</b>    |                                          | <b>9</b>  |
|                  | <b>Boidae</b>                            |           |
|                  | <i>Eryx jayakari</i>                     | LC        |
|                  | <b>Colubridae</b>                        |           |
|                  | <i>Lytorhynchus diadema diadema</i>      | LC        |
|                  | <i>Platyceps rhodorachis rhodorachis</i> | LC*       |
|                  | <i>Telescopus dhara dhara</i>            | LC*       |
|                  | <b>Lamprophiidae</b>                     |           |
|                  | <i>Psammophis schokari</i>               | LC*       |
|                  | <i>Rhagerhis moilensis</i>               | LC*       |
|                  | <b>Viperidae</b>                         |           |
|                  | <i>Echis carinatus sochureki</i>         | LC*       |
|                  | <i>Echis omanensis</i>                   | LC        |
|                  | <i>Pseudocerastes persicus</i>           | LC        |

\* Not available on the web

## Ad Dakhliyyah Governorate

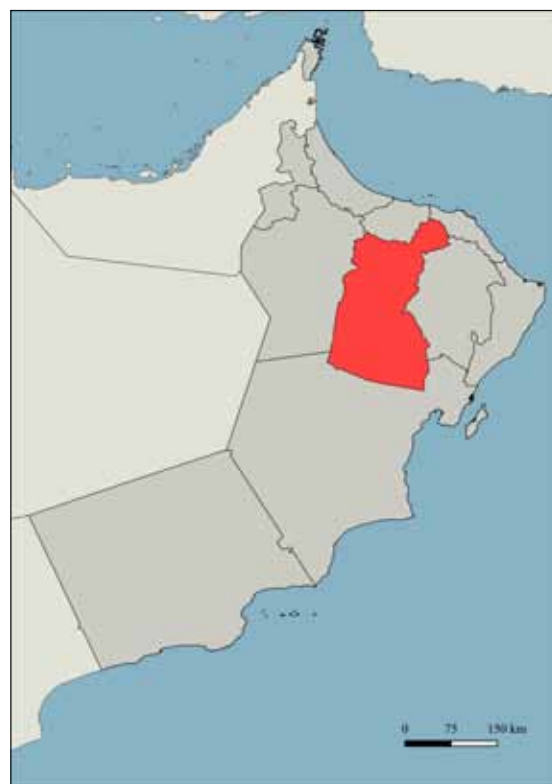

| Venomous species |                                  |          |
|------------------|----------------------------------|----------|
| Taxa             | Family/Specie                    | Total    |
| <b>Lizards</b>   |                                  | <b>0</b> |
| <b>Snakes</b>    |                                  | <b>3</b> |
|                  | <b>Viperidae</b>                 |          |
|                  | <i>Echis carinatus sochureki</i> |          |
|                  | <i>Echis omanensis</i>           |          |
|                  | <i>Pseudocerastes persicus</i>   |          |

| Endemic species |                                |          |
|-----------------|--------------------------------|----------|
| Taxa            | Family/Specie                  | Total    |
| <b>Lizards</b>  |                                | <b>6</b> |
| <b>Geckos</b>   |                                | <b>6</b> |
|                 | <b>Gekkonidae</b>              |          |
|                 | <i>Hemidactylus hajarensis</i> |          |
|                 | <i>Hemidactylus luqueorum</i>  |          |
|                 | <b>Phyllodactylidae</b>        |          |
|                 | <i>Asaccus montanus</i>        |          |
|                 | <i>Asaccus platyrhynchus</i>   |          |
|                 | <b>Sphaerodactylidae</b>       |          |
|                 | <i>Pristurus gallagheri</i>    |          |
|                 | <i>Pristurus</i> sp. 5         |          |
| <b>Snakes</b>   |                                | <b>0</b> |

## Muscat Governorate

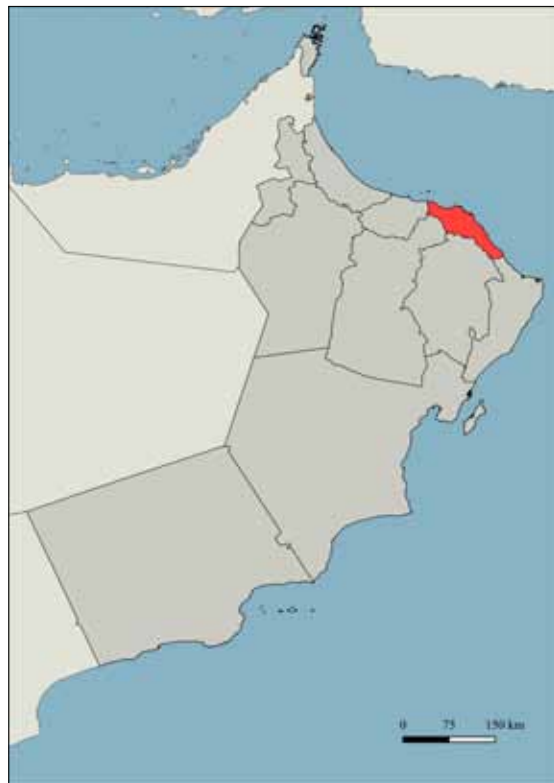

| Venomous species |                                  |       |
|------------------|----------------------------------|-------|
| Taxa             | Family/Specie                    | Total |
| Lizards          |                                  | 0     |
| Snakes           |                                  | 2     |
|                  | Viperidae                        |       |
|                  | <i>Echis carinatus sochureki</i> |       |
|                  | <i>Echis omanensis</i>           |       |

| Endemic species |                                |       |
|-----------------|--------------------------------|-------|
| Taxa            | Family/Specie                  | Total |
| Lizards         |                                | 5     |
| Geckos          |                                | 5     |
|                 | Gekkonidae                     |       |
|                 | <i>Hemidactylus endophis</i>   |       |
|                 | <i>Hemidactylus hajarensis</i> |       |
|                 | Phyllodactylidae               |       |
|                 | <i>Asaccus arnoldi</i>         |       |
|                 | Sphaerodactylidae              |       |
|                 | <i>Pristurus</i> sp. 2         |       |
|                 | <i>Pristurus</i> sp. 5         |       |
| Snakes          |                                | 0     |

## S111: Species list by governorate

| IUCN categories |                                              |       |
|-----------------|----------------------------------------------|-------|
| Taxa            | Family/Specie                                | Total |
| Lizards         |                                              | 27    |
| Agamids         |                                              | 3     |
|                 | Agamidae                                     |       |
|                 | <i>Pseudotrapelus jensvindumi</i>            | NE    |
|                 | <i>Trapelus flavimaculatus</i>               | LC    |
|                 | <i>Uromastyx aegyptia leptieni</i>           | VU    |
| Geckos          |                                              | 15    |
|                 | Gekkonidae                                   |       |
|                 | <i>Bunopus tuberculatus</i>                  | LC    |
|                 | <i>Cyrtopodion scabrum</i>                   | LC    |
|                 | <i>Hemidactylus endophis</i>                 | NE    |
|                 | <i>Hemidactylus flaviviridis</i>             | LC*   |
|                 | <i>Hemidactylus hajarensis</i>               | NE    |
|                 | <i>Hemidactylus leschenaultii</i>            | LC*   |
|                 | <i>Hemidactylus robustus</i>                 | LC*   |
|                 | <i>Stenodactylus leptocosymbotes</i>         | LC*   |
|                 | <i>Trachydactylus hajarensis</i>             | NE    |
|                 | Phyllodactylidae                             |       |
|                 | <i>Asaccus arnoldi</i>                       | NE    |
|                 | <i>Ptyodactylus orlovi</i>                   | NE    |
|                 | Sphaerodactylidae                            |       |
|                 | <i>Pristurus carteri</i>                     | LC    |
|                 | <i>Pristurus rupestris rupestris</i>         | NE    |
|                 | <i>Pristurus</i> sp. 2                       | NE    |
|                 | <i>Pristurus</i> sp. 5                       | NE    |
| Lacertids       |                                              | 4     |
|                 | Lacertidae                                   |       |
|                 | <i>Acanthodactylus blanfordii</i>            | LC*   |
|                 | <i>Mesalina adramitana</i>                   | LC    |
|                 | <i>Omanosaura cyanura</i>                    | LC    |
|                 | <i>Omanosaura jayakari</i>                   | LC    |
| Skinks          |                                              | 4     |
|                 | Scincidae                                    |       |
|                 | <i>Chalcides ocellatus ocellatus</i>         | LC*   |
|                 | <i>Heremites septemtaeniatus</i>             | LC*   |
|                 | <i>Scincus mitranus</i>                      | LC    |
|                 | <i>Trachylepis tessellata</i>                | LC    |
| Varanids        |                                              | 1     |
|                 | Varanidae                                    |       |
|                 | <i>Varanus griseus</i>                       | LC*   |
| Snakes          |                                              | 12    |
|                 | Boidae                                       |       |
|                 | <i>Eryx jayakari</i>                         | LC    |
|                 | Colubridae                                   |       |
|                 | <i>Lytorhynchus diadema diadema</i>          | LC    |
|                 | <i>Platycephalus rhodorachis rhodorachis</i> | LC*   |
|                 | <i>Spalerosophis diadema cliffordii</i>      | LC*   |
|                 | <i>Telescopus dhara dhara</i>                | LC*   |
|                 | Lamprophiidae                                |       |
|                 | <i>Psammodon schokari</i>                    | LC*   |

## S112: Species list by governorate

| IUCN categories      |                                          |           |
|----------------------|------------------------------------------|-----------|
| Taxa                 | Family/Specie                            | Total     |
| <b>Lizards</b>       |                                          | <b>33</b> |
| <b>Agamids</b>       |                                          | <b>4</b>  |
|                      | Agamidae                                 |           |
|                      | <i>Phrynocephalus sakoi</i>              | NE        |
|                      | <i>Pseudotrapelus jensvindumi</i>        | NE        |
|                      | <i>Trapelus flavimaculatus</i>           | LC        |
|                      | <i>Uromastyx aegyptia microlepis</i>     | VU        |
| <b>Geckos</b>        |                                          | <b>18</b> |
|                      | Gekkonidae                               |           |
|                      | <i>Bunopus tuberculatus</i>              | LC        |
|                      | <i>Hemidactylus flaviviridis</i>         | LC*       |
|                      | <i>Hemidactylus hajarensis</i>           | NE        |
|                      | <i>Hemidactylus robustus</i>             | LC*       |
|                      | <i>Hemidactylus sp.</i>                  | NE        |
|                      | <i>Stenodactylus doriae</i>              | LC        |
|                      | <i>Stenodactylus leptocosymbotes</i>     | LC*       |
|                      | <i>Stenodactylus sharqiyahensis</i>      | NE        |
|                      | <i>Trachydactylus hajarensis</i>         | NE        |
|                      | Phyllodactylidae                         |           |
|                      | <i>Asaccus arnoldi</i>                   | NE        |
|                      | <i>Ptyodactylus orlovi</i>               | NE        |
|                      | Sphaerodactylidae                        |           |
|                      | <i>Pristurus carteri</i>                 | LC        |
|                      | <i>Pristurus minimus</i>                 | LC        |
|                      | <i>Pristurus rupestris rupestris</i>     | NE        |
|                      | <i>Pristurus sp. 2</i>                   | NE        |
|                      | <i>Pristurus sp. 3</i>                   | NE        |
|                      | <i>Pristurus sp. 4</i>                   | NE        |
|                      | <i>Pristurus sp. 5</i>                   | NE        |
| <b>Lacertids</b>     |                                          | <b>7</b>  |
|                      | Lacertidae                               |           |
|                      | <i>Acanthodactylus boskianus</i>         | LC*       |
|                      | <i>Acanthodactylus haasi</i>             | LC        |
|                      | <i>Acanthodactylus opheodurus</i>        | LC        |
|                      | <i>Acanthodactylus schmidti</i>          | LC        |
|                      | <i>Mesalina adramitana</i>               | LC        |
|                      | <i>Omanosaura cyanura</i>                | LC        |
|                      | <i>Omanosaura jayakari</i>               | LC        |
| <b>Skinks</b>        |                                          | <b>2</b>  |
|                      | Scincidae                                |           |
|                      | <i>Scincus mitranus</i>                  | LC        |
|                      | <i>Trachylepis tessellata</i>            | LC        |
| <b>Amphisbaenids</b> |                                          | <b>1</b>  |
|                      | Trogonophidae                            |           |
|                      | <i>Diplometopon zarudnyi</i>             | LC        |
| <b>Varanids</b>      |                                          | <b>1</b>  |
|                      | Varanidae                                |           |
|                      | <i>Varanus griseus</i>                   | LC*       |
| <b>Snakes</b>        |                                          | <b>9</b>  |
|                      | Boidae                                   |           |
|                      | <i>Eryx jayakari</i>                     | LC        |
|                      | Colubridae                               |           |
|                      | <i>Platyceps rhodorachis rhodorachis</i> | LC*       |
|                      | <i>Telescopus dhara dhara</i>            | LC*       |
|                      | Lamprophiidae                            |           |
|                      | <i>Psammophis schokari</i>               | LC*       |
|                      | <i>Rhagerhis moilensis</i>               | LC*       |
|                      | Leptotyphlopidae                         |           |
|                      | <i>Myriopholis macrorhyncha</i>          | LC*       |
|                      | Viperidae                                |           |
|                      | <i>Cerastes gasperettii gasperettii</i>  | LC        |
|                      | <i>Echis omanensis</i>                   | LC        |
|                      | <i>Pseudocerastes persicus</i>           | LC        |

\* Not available on the web

## Ash Sharqiyyah North Governorate

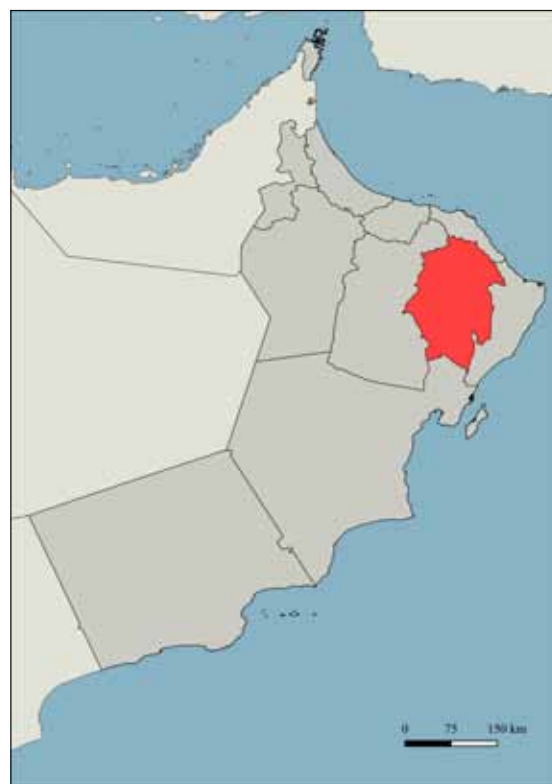

| Venomous species |                                         |          |
|------------------|-----------------------------------------|----------|
| Taxa             | Family/Specie                           | Total    |
| <b>Lizards</b>   |                                         | <b>0</b> |
| <b>Snakes</b>    |                                         | <b>3</b> |
|                  | Viperidae                               |          |
|                  | <i>Cerastes gasperettii gasperettii</i> |          |
|                  | <i>Echis omanensis</i>                  |          |
|                  | <i>Pseudocerastes persicus</i>          |          |

| Endemic species |                                     |          |
|-----------------|-------------------------------------|----------|
| Taxa            | Family/Specie                       | Total    |
| <b>Lizards</b>  |                                     | <b>8</b> |
| <b>Agamids</b>  |                                     | <b>1</b> |
|                 | Agamidae                            |          |
|                 | <i>Phrynocephalus sakoi</i>         |          |
| <b>Geckos</b>   |                                     | <b>7</b> |
|                 | Gekkonidae                          |          |
|                 | <i>Hemidactylus hajarensis</i>      |          |
|                 | <i>Hemidactylus sp.</i>             |          |
|                 | <i>Stenodactylus sharqiyahensis</i> |          |
|                 | Phyllodactylidae                    |          |
|                 | <i>Asaccus arnoldi</i>              |          |
|                 | Sphaerodactylidae                   |          |
|                 | <i>Pristurus sp. 2</i>              |          |
|                 | <i>Pristurus sp. 4</i>              |          |
|                 | <i>Pristurus sp. 5</i>              |          |
| <b>Snakes</b>   |                                     | <b>0</b> |

## Ash Sharqiyyah South Governorate

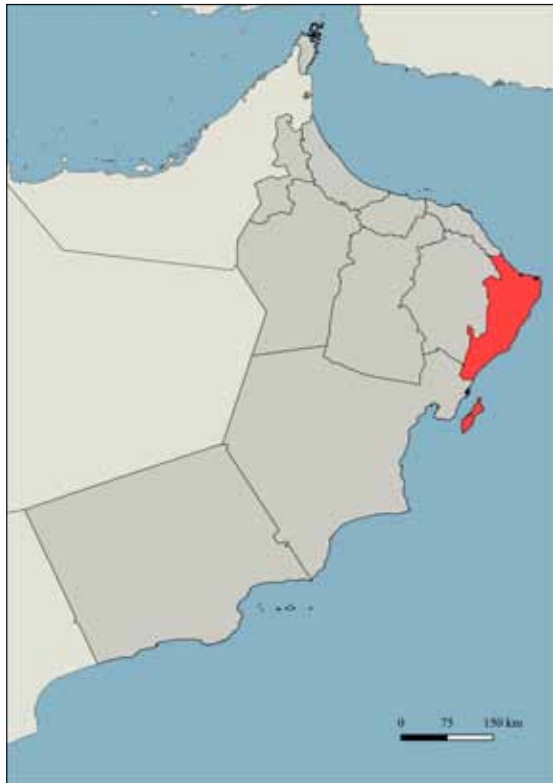

| Venomous species |                                         |       |
|------------------|-----------------------------------------|-------|
| Taxa             | Family/Specie                           | Total |
| Lizards          |                                         | 0     |
| Snakes           |                                         | 3     |
|                  | Viperidae                               |       |
|                  | <i>Cerastes gasperettii gasperettii</i> |       |
|                  | <i>Echis carinatus sochureki</i>        |       |
|                  | <i>Echis omanensis</i>                  |       |

## S113: Species list by governorate

| IUCN categories      |                                          |           |
|----------------------|------------------------------------------|-----------|
| Taxa                 | Family/Specie                            | Total     |
| <b>Lizards</b>       |                                          | <b>37</b> |
| <b>Agamids</b>       |                                          | <b>5</b>  |
|                      | Agamidae                                 |           |
|                      | <i>Phrynocephalus sakoi</i>              | NE        |
|                      | <i>Pseudotrapelus dhofarensis</i>        | NE        |
|                      | <i>Pseudotrapelus jensvindumi</i>        | NE        |
|                      | <i>Uromastyx thomasi</i>                 | VU        |
|                      | Chamaeleonidae                           |           |
|                      | <i>Chamaeleo arabicus</i>                | LC        |
| <b>Geckos</b>        |                                          | <b>19</b> |
|                      | Gekkonidae                               |           |
|                      | <i>Bunopus tuberculatus</i>              | LC        |
|                      | <i>Hemidactylus flaviviridis</i>         | LC*       |
|                      | <i>Hemidactylus hajarensis</i>           | NE        |
|                      | <i>Hemidactylus masirahensis</i>         | NE        |
|                      | <i>Hemidactylus minutus</i>              | NE        |
|                      | <i>Hemidactylus robustus</i>             | LC*       |
|                      | <i>Pseudoceramodactylus khobarensis</i>  | LC        |
|                      | <i>Stenodactylus doriae</i>              | LC        |
|                      | <i>Stenodactylus leptocosymbotes</i>     | LC*       |
|                      | <i>Stenodactylus sharqiyahensis</i>      | NE        |
|                      | <i>Trachydactylus hajarensis</i>         | NE        |
|                      | Phyllodactylidae                         |           |
|                      | <i>Asaccus arnoldi</i>                   | NE        |
|                      | <i>Ptyodactylus orlovi</i>               | NE        |
|                      | Sphaerodactylidae                        |           |
|                      | <i>Pristurus carteri</i>                 | LC        |
|                      | <i>Pristurus minimus</i>                 | LC        |
|                      | <i>Pristurus rupestris rupestris</i>     | NE        |
|                      | <i>Pristurus sp. 2</i>                   | NE        |
|                      | <i>Pristurus sp. 3</i>                   | NE        |
|                      | <i>Pristurus sp. 5</i>                   | NE        |
| <b>Lacertids</b>     |                                          | <b>8</b>  |
|                      | Lacertidae                               |           |
|                      | <i>Acanthodactylus boskianus</i>         | LC*       |
|                      | <i>Acanthodactylus haasi</i>             | LC        |
|                      | <i>Acanthodactylus masirae</i>           | DD        |
|                      | <i>Acanthodactylus ophiodurus</i>        | LC        |
|                      | <i>Acanthodactylus schmidti</i>          | LC        |
|                      | <i>Mesalina adramitana</i>               | LC        |
|                      | <i>Omanosaura cyanura</i>                | LC        |
|                      | <i>Omanosaura jayakari</i>               | LC        |
| <b>Skinks</b>        |                                          | <b>3</b>  |
|                      | Scincidae                                |           |
|                      | <i>Chalcides ocellatus ocellatus</i>     | LC*       |
|                      | <i>Scincus mitranus</i>                  | LC        |
|                      | <i>Trachylepis tessellata</i>            | LC        |
| <b>Amphisbaenids</b> |                                          | <b>1</b>  |
|                      | Trogonophidae                            |           |
|                      | <i>Diplometopon zarudnyi</i>             | LC        |
| <b>Varanids</b>      |                                          | <b>1</b>  |
|                      | Varanidae                                |           |
|                      | <i>Varanus griseus</i>                   | LC*       |
| <b>Snakes</b>        |                                          | <b>11</b> |
|                      | Boidae                                   |           |
|                      | <i>Eryx jayakari</i>                     | LC        |
|                      | Colubridae                               |           |
|                      | <i>Lytorhynchus diadema diadema</i>      | LC        |
|                      | <i>Platyceps rhodorachis rhodorachis</i> | LC*       |
|                      | <i>Spalerosophis diadema cliffordii</i>  | LC*       |
|                      | <i>Telescopus dhara dhara</i>            | LC*       |
|                      | Lamprophiidae                            |           |
|                      | <i>Psammophis schokari</i>               | LC*       |
|                      | <i>Rhagerhis moilensis</i>               | LC*       |
|                      | Leptotyphlopidae                         |           |
|                      | <i>Myriopholis macrorhyncha</i>          | LC*       |
|                      | Viperidae                                |           |
|                      | <i>Cerastes gasperettii gasperettii</i>  | LC        |
|                      | <i>Echis carinatus sochureki</i>         | LC*       |
|                      | <i>Echis omanensis</i>                   | LC        |

\* Not available on the web



## S114: Species list by governorate

| Endemic species  |                                     |          |
|------------------|-------------------------------------|----------|
| Taxa             | Family/Specie                       | Total    |
| <b>Lizards</b>   |                                     | <b>9</b> |
| <b>Agamids</b>   |                                     | <b>2</b> |
|                  | Agamidae                            |          |
|                  | <i>Phrynocephalus sakoi</i>         |          |
|                  | <i>Uromastix thomasi</i>            |          |
| <b>Geckos</b>    |                                     | <b>6</b> |
|                  | Gekkonidae                          |          |
|                  | <i>Hemidactylus hajarensis</i>      |          |
|                  | <i>Hemidactylus masirahensis</i>    |          |
|                  | <i>Stenodactylus sharqiyahensis</i> |          |
|                  | Phyllodactylidae                    |          |
|                  | <i>Asaccus arnoldi</i>              |          |
|                  | Sphaerodactylidae                   |          |
|                  | <i>Pristurus</i> sp. 2              |          |
|                  | <i>Pristurus</i> sp. 5              |          |
| <b>Lacertids</b> |                                     | <b>1</b> |
|                  | Lacertidae                          |          |
|                  | <i>Acanthodactylus masirae</i>      |          |
| <b>Snakes</b>    |                                     | <b>0</b> |

## Ash Sharqiyyah South Governorate

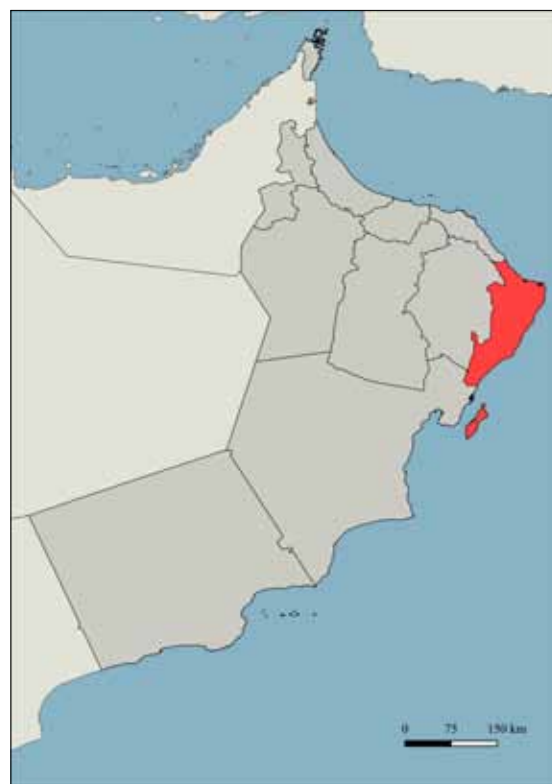

| Species of Masirah Islands |                                          |           |
|----------------------------|------------------------------------------|-----------|
| Taxa                       | Family/Specie                            | Total     |
| <b>Lizards</b>             |                                          | <b>13</b> |
| <b>Agamids</b>             |                                          | <b>3</b>  |
|                            | Agamidae                                 |           |
|                            | <i>Pseudotrapelus dhofarensis</i>        |           |
|                            | <i>Uromastix thomasi</i>                 |           |
|                            | Chamaeleonidae                           |           |
|                            | <i>Chamaeleo arabicus</i>                |           |
| <b>Geckos</b>              |                                          | <b>6</b>  |
|                            | Gekkonidae                               |           |
|                            | <i>Hemidactylus masirahensis</i>         |           |
|                            | <i>Hemidactylus robustus</i>             |           |
|                            | <i>Stenodactylus leptocymbotes</i>       |           |
|                            | <i>Trachydactylus hajarensis</i>         |           |
|                            | Sphaerodactylidae                        |           |
|                            | <i>Pristurus carteri</i>                 |           |
|                            | <i>Pristurus minimus</i>                 |           |
| <b>Lacertids</b>           |                                          | <b>2</b>  |
|                            | Lacertidae                               |           |
|                            | <i>Acanthodactylus masirae</i>           |           |
|                            | <i>Mesalina adramitana</i>               |           |
| <b>Skinks</b>              |                                          | <b>2</b>  |
|                            | Scincidae                                |           |
|                            | <i>Scincus mitranus</i>                  |           |
|                            | <i>Trachylepis tessellata</i>            |           |
| <b>Snakes</b>              |                                          | <b>6</b>  |
|                            | Colubridae                               |           |
|                            | <i>Platyceps rhodorachis rhodorachis</i> |           |
|                            | <i>Spalerosophis diadema cliffordii</i>  |           |
|                            | <i>Telescopus dhara dhara</i>            |           |
|                            | Lamprophiidae                            |           |
|                            | <i>Psammophis schokari</i>               |           |
|                            | <i>Rhagerhis moilensis</i>               |           |
|                            | Viperidae                                |           |
|                            | <i>Echis carinatus sochureki</i>         |           |

## Al Wusta Governorate

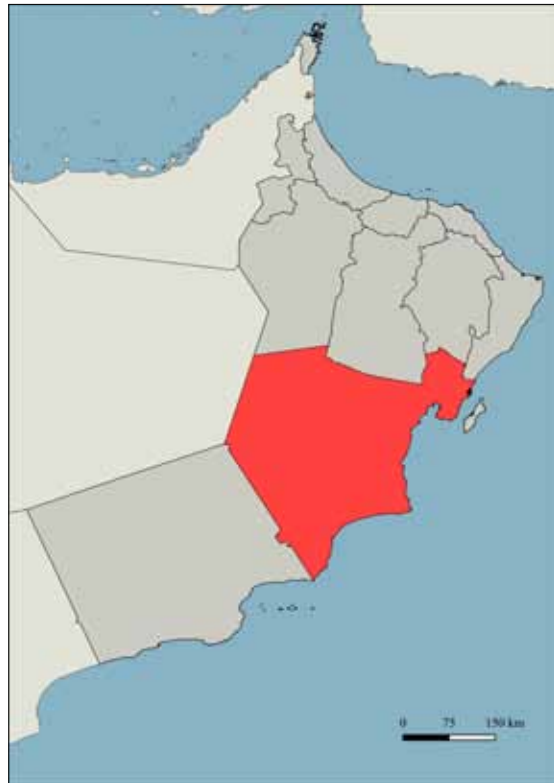

| Venomous species |                                         |       |
|------------------|-----------------------------------------|-------|
| Taxa             | Family/Specie                           | Total |
| Lizards          |                                         | 0     |
| Snakes           |                                         | 4     |
|                  | Viperidae                               |       |
|                  | <i>Cerastes gasperettii gasperettii</i> |       |
|                  | <i>Echis carinatus sochureki</i>        |       |
|                  | <i>Echis coloratus</i>                  |       |
|                  | <i>Echis khosatzkii</i>                 |       |

| Endemic species |                                     |       |
|-----------------|-------------------------------------|-------|
| Taxa            | Family/Specie                       | Total |
| Lizards         |                                     | 5     |
| Agamids         |                                     | 2     |
|                 | Agamidae                            |       |
|                 | <i>Phrynocephalus sakoi</i>         |       |
|                 | <i>Uromastyx thomasi</i>            |       |
| Geckos          |                                     | 2     |
|                 | Gekkonidae                          |       |
|                 | <i>Hemidactylus inexpectatus</i>    |       |
|                 | <i>Stenodactylus sharqiyahensis</i> |       |
| Lacertids       |                                     | 1     |
|                 | Lacertidae                          |       |
|                 | <i>Acanthodactylus masirae</i>      |       |
| Snakes          |                                     | 0     |

| Species of Al Wusta Islands |                                  |       |
|-----------------------------|----------------------------------|-------|
| Taxa                        | Family/Specie                    | Total |
| Lizards                     |                                  | 4     |
| Geckos                      |                                  | 3     |
|                             | Gekkonidae                       |       |
|                             | <i>Hemidactylus inexpectatus</i> |       |
|                             | Sphaerodactylidae                |       |
|                             | <i>Pristurus carteri</i>         |       |
|                             | <i>Pristurus</i> sp. 1           |       |
| Lacertids                   |                                  | 1     |
|                             | Lacertidae                       |       |
|                             | <i>Acanthodactylus masirae</i>   |       |
| Snakes                      |                                  | 0     |

## S115: Species list by governorate

| IUCN categories |                                          |       |
|-----------------|------------------------------------------|-------|
| Taxa            | Family/Specie                            | Total |
| Lizards         |                                          | 31    |
| Agamids         |                                          | 7     |
|                 | Agamidae                                 |       |
|                 | <i>Phrynocephalus arabicus</i>           | LC    |
|                 | <i>Phrynocephalus maculatus</i>          | LC*   |
|                 | <i>Phrynocephalus sakoi</i>              | NE    |
|                 | <i>Pseudotrapelus dhofarensis</i>        | NE    |
|                 | <i>Trapelus flavimaculatus</i>           | LC    |
|                 | <i>Uromastyx aegyptia microlepis</i>     | VU    |
|                 | <i>Uromastyx thomasi</i>                 | VU    |
| Geckos          |                                          | 15    |
|                 | Gekkonidae                               |       |
|                 | <i>Bunopus tuberculatus</i>              | LC    |
|                 | <i>Hemidactylus festivus</i>             | NE    |
|                 | <i>Hemidactylus inexpectatus</i>         | NE    |
|                 | <i>Hemidactylus minutus</i>              | NE    |
|                 | <i>Hemidactylus robustus</i>             | LC*   |
|                 | <i>Pseudoceramodactylus khobarensis</i>  | LC    |
|                 | <i>Stenodactylus arabicus</i>            | LC    |
|                 | <i>Stenodactylus doriae</i>              | LC    |
|                 | <i>Stenodactylus leptocosymbotes</i>     | LC*   |
|                 | <i>Stenodactylus sharqiyahensis</i>      | NE    |
|                 | <i>Trachydactylus hajarensis</i>         | NE    |
|                 | <i>Tropicolotes scortecci</i>            | LC    |
|                 | Sphaerodactylidae                        |       |
|                 | <i>Pristurus carteri</i>                 | LC    |
|                 | <i>Pristurus minimus</i>                 | LC    |
|                 | <i>Pristurus</i> sp. 1                   | NE    |
| Lacertids       |                                          | 6     |
|                 | Lacertidae                               |       |
|                 | <i>Acanthodactylus boskianus</i>         | LC*   |
|                 | <i>Acanthodactylus haasi</i>             | LC    |
|                 | <i>Acanthodactylus masirae</i>           | DD    |
|                 | <i>Acanthodactylus ophiodurus</i>        | LC    |
|                 | <i>Acanthodactylus schmidti</i>          | LC    |
|                 | <i>Mesalina adramitana</i>               | LC    |
| Skinks          |                                          | 1     |
|                 | Scincidae                                |       |
|                 | <i>Scincus mitranus</i>                  | LC    |
| Amphisbaenids   |                                          | 1     |
|                 | Trogonophidae                            |       |
|                 | <i>Diplometopon zarudnyi</i>             | LC    |
| Varanids        |                                          | 1     |
|                 | Varanidae                                |       |
|                 | <i>Varanus griseus</i>                   | LC*   |
| Snakes          |                                          | 12    |
|                 | Boidae                                   |       |
|                 | <i>Eryx jayakari</i>                     | LC    |
|                 | Colubridae                               |       |
|                 | <i>Lytorhynchus diadema diadema</i>      | LC    |
|                 | <i>Platyceps rhodorachis rhodorachis</i> | LC*   |
|                 | <i>Spalerosophis diadema cliffordii</i>  | LC*   |
|                 | <i>Telescopus dhara dhara</i>            | LC*   |
|                 | Lamprophiidae                            |       |
|                 | <i>Psammophis schokari</i>               | LC*   |
|                 | <i>Rhagerhis moilensis</i>               | LC*   |
|                 | Leptotyphlopidae                         |       |
|                 | <i>Myriopholis macrorhyncha</i>          | LC*   |
|                 | Viperidae                                |       |
|                 | <i>Cerastes gasperettii gasperettii</i>  | LC    |
|                 | <i>Echis carinatus sochureki</i>         | LC*   |
|                 | <i>Echis coloratus</i>                   | LC*   |
|                 | <i>Echis khosatzkii</i>                  | LC    |

\* Not available on the web

## S116: Species list by governorate

| IUCN categories  |                                              |           |
|------------------|----------------------------------------------|-----------|
| Taxa             | Family/Specie                                | Total     |
| <b>Lizards</b>   |                                              | <b>43</b> |
| <b>Agamids</b>   |                                              | <b>10</b> |
|                  | <b>Agamidae</b>                              |           |
|                  | <i>Acanthocercus adramitanus</i>             | LC        |
|                  | <i>Calotes versicolor</i>                    | LC*       |
|                  | <i>Phrynocephalus arabicus</i>               | LC        |
|                  | <i>Phrynocephalus maculatus</i>              | LC*       |
|                  | <i>Pseudotrapelus dhofarensis</i>            | NE        |
|                  | <i>Trapelus flavimaculatus</i>               | LC        |
|                  | <i>Uromastyx aegyptia microlepis</i>         | VU        |
|                  | <i>Uromastyx bentii</i>                      | LC        |
|                  | <i>Uromastyx thomasi</i>                     | VU        |
|                  | <b>Chamaeleonidae</b>                        |           |
|                  | <i>Chamaeleo arabicus</i>                    | LC        |
| <b>Geckos</b>    |                                              | <b>19</b> |
|                  | <b>Gekkonidae</b>                            |           |
|                  | <i>Bunopus tuberculatus</i>                  | LC        |
|                  | <i>Cyrtopodion scabrum</i>                   | LC        |
|                  | <i>Hemidactylus alkiyumii</i>                | NE        |
|                  | <i>Hemidactylus festivus</i>                 | NE        |
|                  | <i>Hemidactylus flaviviridis</i>             | LC*       |
|                  | <i>Hemidactylus lemurinus</i>                | DD        |
|                  | <i>Hemidactylus minutus</i>                  | NE        |
|                  | <i>Hemidactylus paucituberculatus</i>        | NE        |
|                  | <i>Hemidactylus robustus</i>                 | LC*       |
|                  | <i>Stenodactylus arabicus</i>                | LC        |
|                  | <i>Stenodactylus doriae</i>                  | LC        |
|                  | <i>Stenodactylus leptocosymbotes</i>         | LC*       |
|                  | <i>Trachydactylus spatulatus</i>             | NE        |
|                  | <i>Tropicolotes scortecci</i>                | LC        |
|                  | <i>Tropicolotes sp.</i>                      | NE        |
|                  | <b>Phyllodactylidae</b>                      |           |
|                  | <i>Ptyodactylus dhofarensis</i>              | NE        |
|                  | <b>Sphaerodactylidae</b>                     |           |
|                  | <i>Pristurus carteri</i>                     | LC        |
|                  | <i>Pristurus minimus</i>                     | LC        |
|                  | <i>Pristurus sp. 1</i>                       | NE        |
| <b>Lacertids</b> |                                              | <b>9</b>  |
|                  | <b>Lacertidae</b>                            |           |
|                  | <i>Acanthodactylus boskianus</i>             | LC*       |
|                  | <i>Acanthodactylus felcisi</i>               | VU        |
|                  | <i>Acanthodactylus masirae</i>               | DD        |
|                  | <i>Acanthodactylus ophiodurus</i>            | LC        |
|                  | <i>Acanthodactylus schmidti</i>              | LC        |
|                  | <i>Mesalina adramitana</i>                   | LC        |
|                  | <i>Mesalina ayunensis</i>                    | DD        |
|                  | <i>Mesalina sp. 1</i>                        | NE        |
|                  | <i>Mesalina sp. 2</i>                        | NE        |
| <b>Skinks</b>    |                                              | <b>4</b>  |
|                  | <b>Scincidae</b>                             |           |
|                  | <i>Chalcides ocellatus ocellatus</i>         | LC*       |
|                  | <i>Scincus mitranus</i>                      | LC        |
|                  | <i>Trachylepis brevicollis</i>               | LC*       |
|                  | <i>Trachylepis tessellata</i>                | LC        |
| <b>Varanids</b>  |                                              | <b>1</b>  |
|                  | <b>Varanidae</b>                             |           |
|                  | <i>Varanus griseus</i>                       | LC*       |
| <b>Snakes</b>    |                                              | <b>17</b> |
|                  | <b>Boidae</b>                                |           |
|                  | <i>Eryx jayakari</i>                         | LC        |
|                  | <b>Colubridae</b>                            |           |
|                  | <i>Lytorhynchus diadema diadema</i>          | LC        |
|                  | <i>Platycephalus rhodorachis rhodorachis</i> | LC*       |
|                  | <i>Platycephalus thomasi</i>                 | DD        |
|                  | <i>Rhynchocalamus arabicus</i>               | DD        |
|                  | <i>Spalerosophis diadema cliffordii</i>      | LC*       |
|                  | <i>Telescopus dhara dhara</i>                | LC*       |
|                  | <b>Elapidae</b>                              |           |
|                  | <i>Naja arabica</i>                          | LC        |
|                  | <b>Lamprophiidae</b>                         |           |
|                  | <i>Atractaspis andersonii</i>                | LC        |
|                  | <i>Psammophis schokari</i>                   | LC*       |
|                  | <i>Rhagerhis moilensis</i>                   | LC*       |
|                  | <b>Leptotyphlopidae</b>                      |           |
|                  | <i>Myriopholis macrorhyncha</i>              | LC*       |
|                  | <i>Myriopholis nursii</i>                    | LC*       |
|                  | <b>Viperidae</b>                             |           |
|                  | <i>Bitis arietans</i>                        | LC*       |
|                  | <i>Cerastes gasperettii gasperettii</i>      | LC        |
|                  | <i>Echis coloratus</i>                       | LC*       |
|                  | <i>Echis khosatzkii</i>                      | LC        |

\* Not available on the web

## Dhofar Governorate

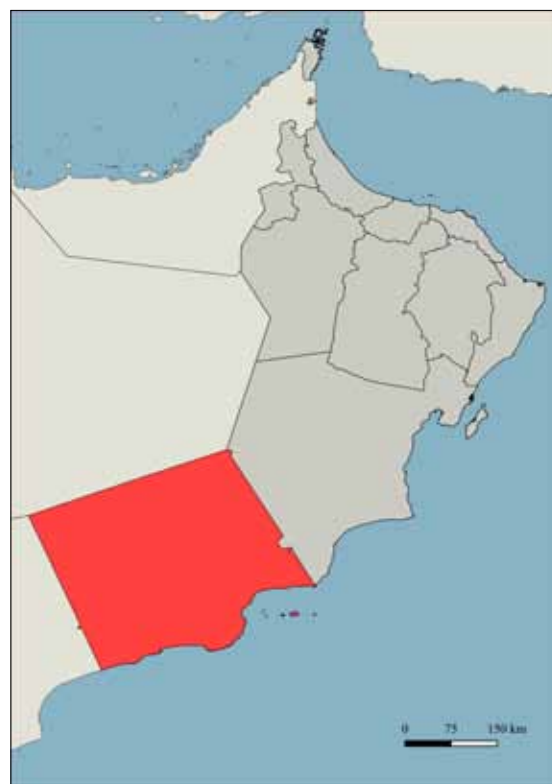

| Venomous species |                                         |              |
|------------------|-----------------------------------------|--------------|
| Taxa             | Family/Specie                           | Total        |
| <b>Lizards</b>   |                                         | <b>0</b>     |
| <b>Snakes</b>    |                                         | <b>6</b>     |
|                  | <b>Elapidae</b>                         |              |
|                  | <i>Naja arabica</i>                     |              |
|                  | <b>Lamprophiidae</b>                    |              |
|                  | <i>Atractaspis andersonii</i>           |              |
|                  | <b>Viperidae</b>                        |              |
|                  | <i>Bitis arietans</i>                   |              |
|                  | <i>Cerastes gasperettii gasperettii</i> |              |
|                  | <i>Echis coloratus</i>                  |              |
|                  | <i>Echis khosatzkii</i>                 |              |
|                  | <b>Endemic species</b>                  |              |
| <b>Taxa</b>      | <b>Family/Specie</b>                    | <b>Total</b> |
| <b>Lizards</b>   |                                         | <b>5</b>     |
| <b>Agamids</b>   |                                         | <b>1</b>     |
|                  | <b>Agamidae</b>                         |              |
|                  | <i>Uromastyx thomasi</i>                |              |
| <b>Geckos</b>    |                                         | <b>2</b>     |
|                  | <b>Gekkonidae</b>                       |              |
|                  | <i>Hemidactylus paucituberculatus</i>   |              |
|                  | <i>Tropicolotes sp.</i>                 |              |
| <b>Lacertids</b> |                                         | <b>2</b>     |
|                  | <b>Lacertidae</b>                       |              |
|                  | <i>Acanthodactylus masirae</i>          |              |
|                  | <i>Mesalina sp. 2</i>                   |              |
| <b>Snakes</b>    |                                         | <b>0</b>     |
|                  | <b>Species of Hallaniyyat Islands</b>   |              |
| <b>Taxa</b>      | <b>Family/Specie</b>                    | <b>Total</b> |
| <b>Lizards</b>   |                                         | <b>6</b>     |
| <b>Geckos</b>    |                                         | <b>6</b>     |
|                  | <b>Gekkonidae</b>                       |              |
|                  | <i>Hemidactylus alkiyumii</i>           |              |
|                  | <i>Hemidactylus paucituberculatus</i>   |              |
|                  | <i>Hemidactylus robustus</i>            |              |
|                  | <i>Tropicolotes scortecci</i>           |              |
|                  | <b>Sphaerodactylidae</b>                |              |
|                  | <i>Pristurus carteri</i>                |              |
|                  | <i>Pristurus sp. 1</i>                  |              |
| <b>Snakes</b>    |                                         | <b>0</b>     |



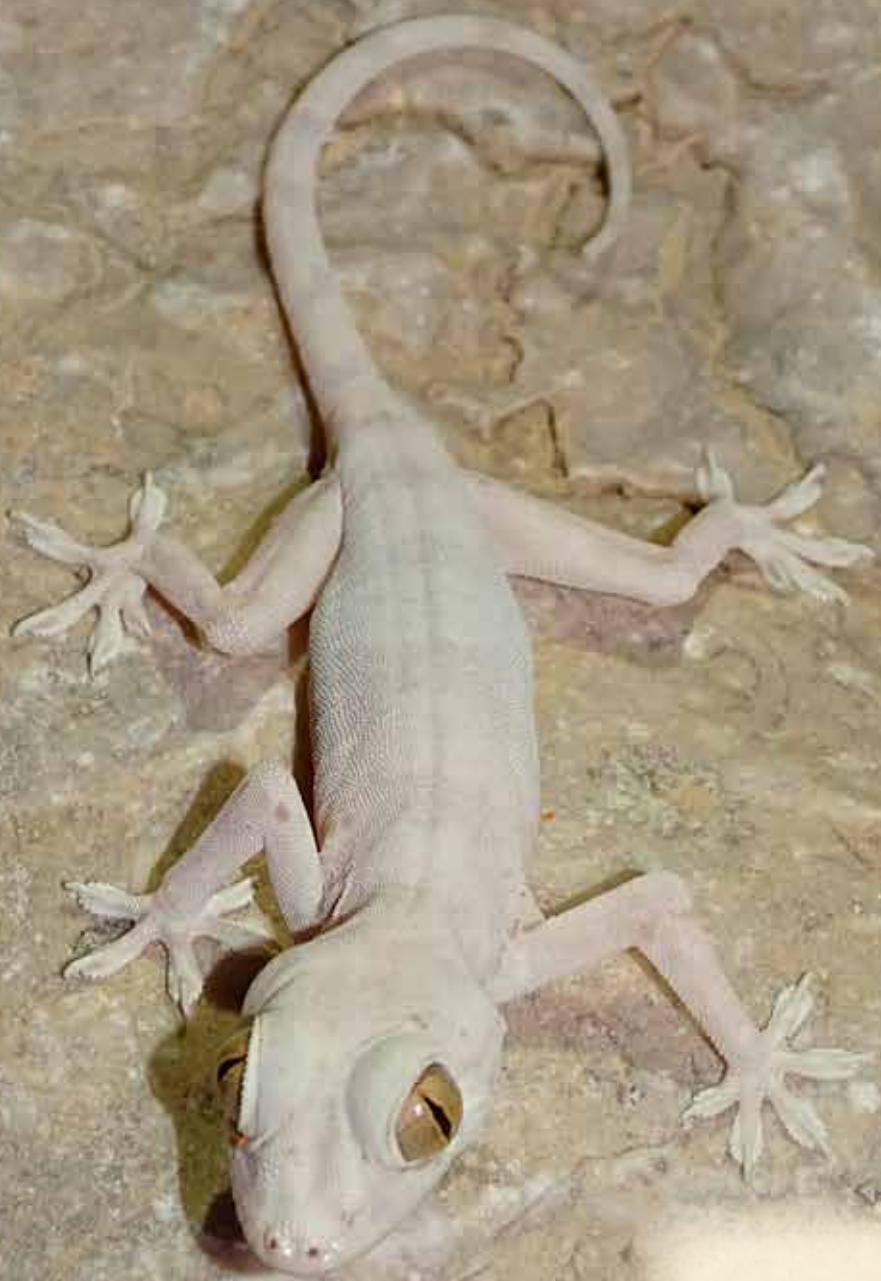

**S117-S121:  
Species lists by  
protected area**

## S117-S121: Species lists by protected area

(S117) Maps of Oman showing the protected areas and a complete list of all the species of terrestrial reptiles within protected areas indicating if the species are endemic, venomous and with their IUCN conservation category. (S118-S121) Map of Oman showing the protected areas and with independent species lists for each one of the 22 protected areas indicating if the species are endemic, venomous and with their IUCN conservation category.

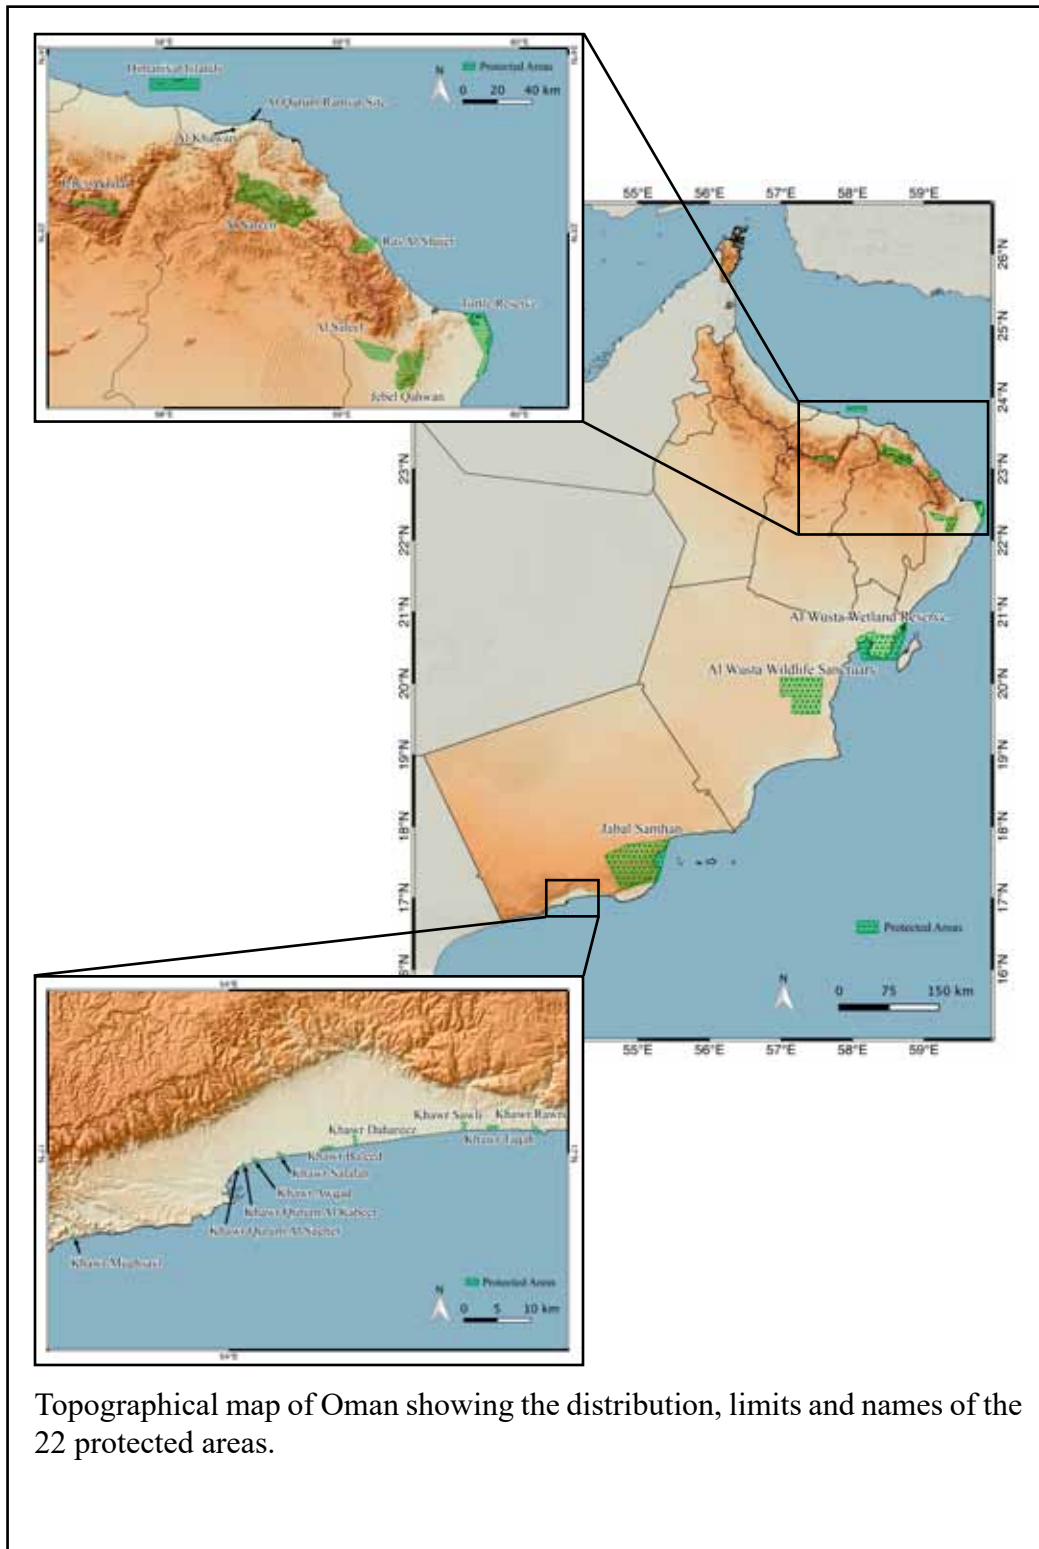

## S117: Species list by protected areas

## Protected areas of Oman

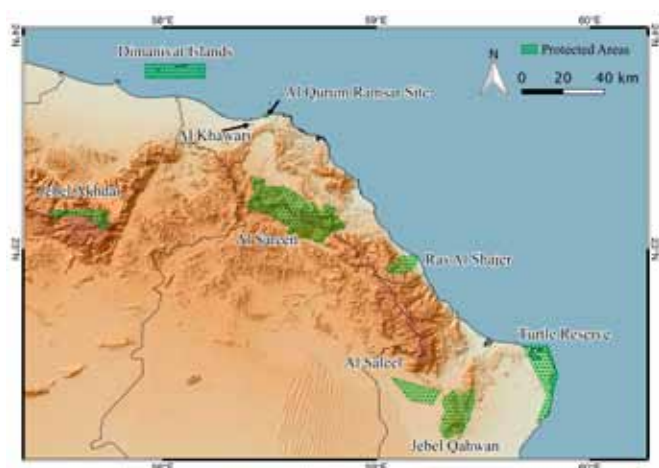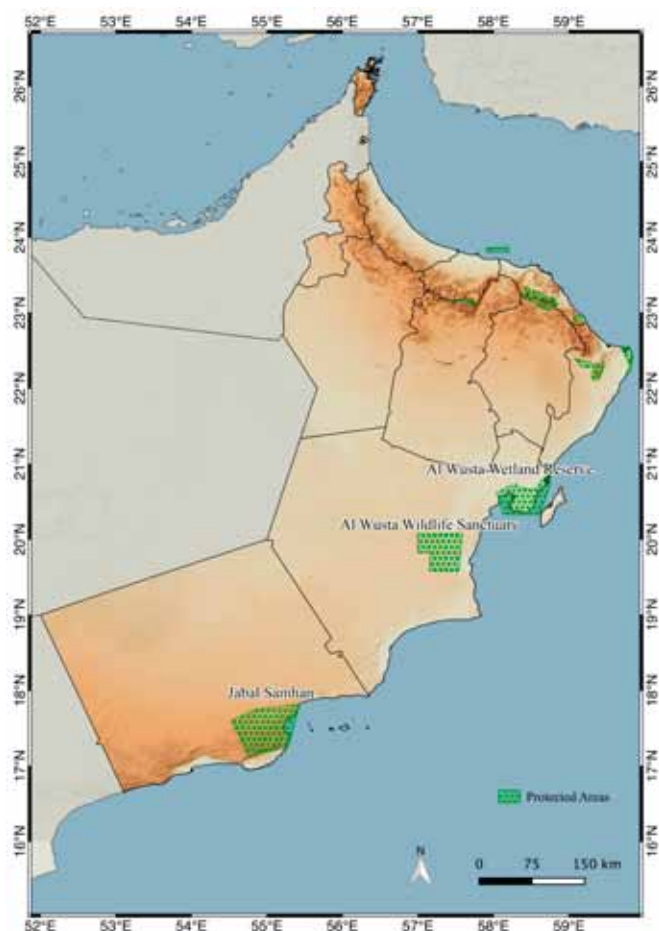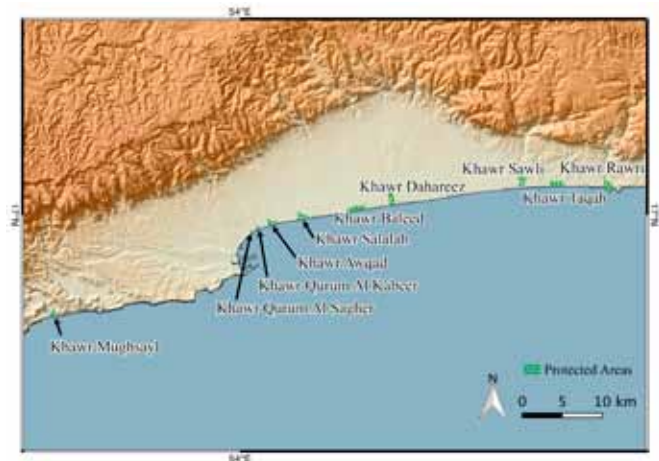

| Species in protected areas |                                          |           |          |           |
|----------------------------|------------------------------------------|-----------|----------|-----------|
| Taxa                       | Family/Specie                            | Endemics  | Venomous | Total     |
| <b>Lizards</b>             |                                          | <b>10</b> | <b>0</b> | <b>47</b> |
| <b>Agamids</b>             |                                          | <b>2</b>  | <b>0</b> | <b>8</b>  |
|                            | <b>Agamidae</b>                          |           |          |           |
|                            | <i>Phrynocephalus maculatus</i>          | NO        | NO       | LC*       |
|                            | <i>Phrynocephalus sakoi</i>              | YES       | NO       | NE        |
|                            | <i>Pseudotrapelus dhofarensis</i>        | NO        | NO       | NE        |
|                            | <i>Pseudotrapelus jensvindumi</i>        | NO        | NO       | NE        |
|                            | <i>Trapelus flavimaculatus</i>           | NO        | NO       | LC        |
|                            | <i>Uromastyx aegyptia microlepis</i>     | NO        | NO       | VU        |
|                            | <i>Uromastyx thomasi</i>                 | YES       | NO       | VU        |
|                            | <b>Chamaeleonidae</b>                    |           |          |           |
|                            | <i>Chamaeleo arabicus</i>                | NO        | NO       | LC        |
| <b>Geckos</b>              |                                          | <b>7</b>  | <b>0</b> | <b>25</b> |
|                            | <b>Gekkonidae</b>                        |           |          |           |
|                            | <i>Bunopus tuberculatus</i>              | NO        | NO       | LC        |
|                            | <i>Hemidactylus alkiyumi</i>             | NO        | NO       | NE        |
|                            | <i>Hemidactylus flaviviridis</i>         | NO        | NO       | LC*       |
|                            | <i>Hemidactylus hajarensis</i>           | YES       | NO       | NE        |
|                            | <i>Hemidactylus minutus</i>              | NO        | NO       | NE        |
|                            | <i>Hemidactylus paucituberculatus</i>    | YES       | NO       | NE        |
|                            | <i>Hemidactylus robustus</i>             | NO        | NO       | LC*       |
|                            | <i>Pseudoceramadactylus khobarensis</i>  | NO        | NO       | LC        |
|                            | <i>Stenodactylus doriae</i>              | NO        | NO       | LC        |
|                            | <i>Stenodactylus leptocosymbotes</i>     | NO        | NO       | LC*       |
|                            | <i>Stenodactylus sharqiyahensis</i>      | YES       | NO       | NE        |
|                            | <i>Trachydactylus hajarensis</i>         | NO        | NO       | NE        |
|                            | <i>Trachydactylus spatulurus</i>         | NO        | NO       | NE        |
|                            | <i>Tropicolotes scortecci</i>            | NO        | NO       | LC        |
|                            | <b>Phyllodactylidae</b>                  |           |          |           |
|                            | <i>Asaccus arnoldi</i>                   | YES       | NO       | NE        |
|                            | <i>Ptyodactylus dhofarensis</i>          | NO        | NO       | NE        |
|                            | <i>Ptyodactylus orlovi</i>               | NO        | NO       | NE        |
|                            | <b>Sphaerodactylidae</b>                 |           |          |           |
|                            | <i>Pristurus carteri</i>                 | NO        | NO       | LC        |
|                            | <i>Pristurus celerrimus</i>              | NO        | NO       | LC        |
|                            | <i>Pristurus gallagheri</i>              | YES       | NO       | NT        |
|                            | <i>Pristurus minimus</i>                 | NO        | NO       | LC        |
|                            | <i>Pristurus rupestris rupestris</i>     | NO        | NO       | NE        |
|                            | <i>Pristurus</i> sp. 1                   | NO        | NO       | NE        |
|                            | <i>Pristurus</i> sp. 4                   | YES       | NO       | NE        |
|                            | <i>Pristurus</i> sp. 5                   | YES       | NO       | NE        |
| <b>Lacertids</b>           |                                          | <b>1</b>  | <b>0</b> | <b>8</b>  |
|                            | <b>Lacertidae</b>                        |           |          |           |
|                            | <i>Acanthodactylus blanfordii</i>        | NO        | NO       | LC*       |
|                            | <i>Acanthodactylus felicis</i>           | NO        | NO       | VU        |
|                            | <i>Acanthodactylus masirae</i>           | YES       | NO       | DD        |
|                            | <i>Acanthodactylus schmidti</i>          | NO        | NO       | LC        |
|                            | <i>Mesalina adramitana</i>               | NO        | NO       | LC        |
|                            | <i>Mesalina</i> sp. 1                    | NO        | NO       | NE        |
|                            | <i>Omanosaura cyanura</i>                | NO        | NO       | LC        |
|                            | <i>Omanosaura jayakari</i>               | NO        | NO       | LC        |
| <b>Skinks</b>              |                                          | <b>0</b>  | <b>0</b> | <b>4</b>  |
|                            | <b>Scincidae</b>                         |           |          |           |
|                            | <i>Chalcides ocellatus ocellatus</i>     | NO        | NO       | LC*       |
|                            | <i>Heremites septemtaeniatus</i>         | NO        | NO       | LC*       |
|                            | <i>Scincus mitranus</i>                  | NO        | NO       | LC        |
|                            | <i>Trachylepis tessellata</i>            | NO        | NO       | LC        |
| <b>Amphisbaenids</b>       |                                          | <b>0</b>  | <b>0</b> | <b>1</b>  |
|                            | <b>Trogonophidae</b>                     |           |          |           |
|                            | <i>Diplometopon zarudnyi</i>             | NO        | NO       | LC        |
| <b>Varanids</b>            |                                          | <b>0</b>  | <b>0</b> | <b>1</b>  |
|                            | <b>Varanidae</b>                         |           |          |           |
|                            | <i>Varanus griseus</i>                   | NO        | NO       | LC*       |
| <b>Snakes</b>              |                                          | <b>0</b>  | <b>7</b> | <b>17</b> |
|                            | <b>Boidae</b>                            |           |          |           |
|                            | <i>Eryx jayakari</i>                     | NO        | NO       | LC        |
|                            | <b>Colubridae</b>                        |           |          |           |
|                            | <i>Lytorhynchus diadema diadema</i>      | NO        | NO       | LC        |
|                            | <i>Platyceps rhodorachis rhodorachis</i> | NO        | NO       | LC*       |
|                            | <i>Platyceps thomasi</i>                 | NO        | NO       | DD        |
|                            | <i>Spalerosophis diadema cliffordii</i>  | NO        | NO       | LC*       |
|                            | <i>Teleocopus dhara dhara</i>            | NO        | NO       | LC*       |
|                            | <b>Elapidae</b>                          |           |          |           |
|                            | <i>Naja arabica</i>                      | NO        | YES      | LC        |
|                            | <b>Lamprophiidae</b>                     |           |          |           |
|                            | <i>Psammophis schokari</i>               | NO        | NO       | LC*       |
|                            | <i>Rhagerhis moilensis</i>               | NO        | NO       | LC*       |
|                            | <b>Leptotyphlopidae</b>                  |           |          |           |
|                            | <i>Myriopholis macrorhyncha</i>          | NO        | NO       | LC*       |
|                            | <i>Myriopholis nursii</i>                | NO        | NO       | LC*       |
|                            | <b>Viperidae</b>                         |           |          |           |
|                            | <i>Cerastes gasperettii gasperettii</i>  | NO        | YES      | LC        |
|                            | <i>Echis carinatus sochureki</i>         | NO        | YES      | LC*       |
|                            | <i>Echis coloratus</i>                   | NO        | YES      | LC*       |
|                            | <i>Echis khosatzkii</i>                  | NO        | YES      | LC        |
|                            | <i>Echis omanensis</i>                   | NO        | YES      | LC        |
|                            | <i>Pseudocerastes persicus</i>           | NO        | YES      | LC        |

\* Not available on the web

## Dimaniyat Islands, Al Qurum Ramsar Site, Al Khawari, Jebel Akhdar, Al Sareen & Ras Al Shajer

## S118: Species list by protected areas

| Dimaniyat Islands |                                          |          |          |       |
|-------------------|------------------------------------------|----------|----------|-------|
| Taxa              | Family/Specie                            | Endemics | Venomous | Total |
| <b>Lizards</b>    |                                          | 0        | 0        | 3     |
| <b>Geckos</b>     |                                          | 0        | 0        | 2     |
|                   | Gekkonidae                               |          |          |       |
|                   | <i>Hemidactylus robustus</i>             | NO       | NO       | LC*   |
|                   | Sphaerodactylidae                        |          |          |       |
|                   | <i>Pristurus rupestris rupestris</i>     | NO       | NO       | NE    |
| <b>Skinks</b>     |                                          | 0        | 0        | 1     |
|                   | Scincidae                                |          |          |       |
|                   | <i>Heremites septemtaeniatus</i>         | NO       | NO       | LC*   |
| <b>Snakes</b>     |                                          | 0        | 0        | 1     |
|                   | Colubridae                               |          |          |       |
|                   | <i>Platyceps rhodorachis rhodorachis</i> | NO       | NO       | LC*   |

\* Not available on the web

| Al Qurum Ramsar Site |                                          |          |          |       |
|----------------------|------------------------------------------|----------|----------|-------|
| Taxa                 | Family/Specie                            | Endemics | Venomous | Total |
| <b>Lizards</b>       |                                          | 0        | 0        | 3     |
| <b>Geckos</b>        |                                          | 0        | 0        | 1     |
|                      | Gekkonidae                               |          |          |       |
|                      | <i>Bunopus tuberculatus</i>              | NO       | NO       | LC    |
| <b>Lacertids</b>     |                                          | 0        | 0        | 1     |
|                      | Lacertidae                               |          |          |       |
|                      | <i>Acanthodactylus blanfordii</i>        | NO       | NO       | LC*   |
| <b>Skinks</b>        |                                          | 0        | 0        | 1     |
|                      | Scincidae                                |          |          |       |
|                      | <i>Scincus mitranus</i>                  | NO       | NO       | LC    |
| <b>Snakes</b>        |                                          | 0        | 0        | 2     |
|                      | Colubridae                               |          |          |       |
|                      | <i>Platyceps rhodorachis rhodorachis</i> | NO       | NO       | LC*   |
|                      | <i>Spalerosophis diadema cliffordii</i>  | NO       | NO       | LC*   |

\* Not available on the web

| Al Khawari       |                                   |          |          |       |
|------------------|-----------------------------------|----------|----------|-------|
| Taxa             | Family/Specie                     | Endemics | Venomous | Total |
| <b>Lizards</b>   |                                   | 0        | 0        | 1     |
| <b>Lacertids</b> |                                   | 0        | 0        | 1     |
|                  | Lacertidae                        |          |          |       |
|                  | <i>Acanthodactylus blanfordii</i> | NO       | NO       | LC*   |
| <b>Snakes</b>    |                                   | 0        | 0        | 0     |

\* Not available on the web

| Jebel Akhdar     |                                          |          |          |       |
|------------------|------------------------------------------|----------|----------|-------|
| Taxa             | Family/Specie                            | Endemics | Venomous | Total |
| <b>Lizards</b>   |                                          | 1        | 0        | 5     |
| <b>Geckos</b>    |                                          | 1        | 0        | 4     |
|                  | Phyllodactylidae                         |          |          |       |
|                  | <i>Ptyodactylus orlovi</i>               | NO       | NO       | NE    |
|                  | Sphaerodactylidae                        |          |          |       |
|                  | <i>Pristurus celerrimus</i>              | NO       | NO       | LC    |
|                  | <i>Pristurus gallagheri</i>              | YES      | NO       | NT    |
|                  | <i>Pristurus rupestris rupestris</i>     | NO       | NO       | NE    |
| <b>Lacertids</b> |                                          | 0        | 0        | 1     |
|                  | Lacertidae                               |          |          |       |
|                  | <i>Omanosaura jayakari</i>               | NO       | NO       | LC    |
| <b>Snakes</b>    |                                          | 0        | 1        | 2     |
|                  | Colubridae                               |          |          |       |
|                  | <i>Platyceps rhodorachis rhodorachis</i> | NO       | NO       | LC*   |
|                  | Viperidae                                |          |          |       |
|                  | <i>Pseudocerastes persicus</i>           | NO       | YES      | LC    |

\* Not available on the web

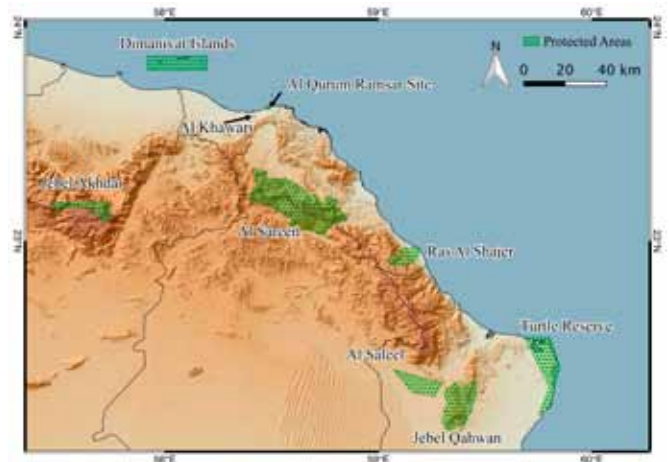

| Al Sareen        |                                          |          |          |       |
|------------------|------------------------------------------|----------|----------|-------|
| Taxa             | Family/Specie                            | Endemics | Venomous | Total |
| <b>Lizards</b>   |                                          | 3        | 0        | 9     |
| <b>Agamids</b>   |                                          | 0        | 0        | 1     |
|                  | Agamidae                                 |          |          |       |
|                  | <i>Pseudotrapelus jensvindumi</i>        | NO       | NO       | NE    |
| <b>Geckos</b>    |                                          | 3        | 0        | 6     |
|                  | Gekkonidae                               |          |          |       |
|                  | <i>Hemidactylus hajarensis</i>           | YES      | NO       | NE    |
|                  | <i>Trachydactylus hajarensis</i>         | NO       | NO       | NE    |
|                  | Phyllodactylidae                         |          |          |       |
|                  | <i>Asaccus arnoldi</i>                   | YES      | NO       | NE    |
|                  | <i>Ptyodactylus orlovi</i>               | NO       | NO       | NE    |
|                  | Sphaerodactylidae                        |          |          |       |
|                  | <i>Pristurus rupestris rupestris</i>     | NO       | NO       | NE    |
|                  | <i>Pristurus sp. 4</i>                   | YES      | NO       | NE    |
| <b>Lacertids</b> |                                          | 0        | 0        | 2     |
|                  | Lacertidae                               |          |          |       |
|                  | <i>Omanosaura cyanura</i>                | NO       | NO       | LC    |
|                  | <i>Omanosaura jayakari</i>               | NO       | NO       | LC    |
| <b>Snakes</b>    |                                          | 0        | 2        | 3     |
|                  | Colubridae                               |          |          |       |
|                  | <i>Platyceps rhodorachis rhodorachis</i> | NO       | NO       | LC*   |
|                  | Viperidae                                |          |          |       |
|                  | <i>Echis omanensis</i>                   | NO       | YES      | LC    |
|                  | <i>Pseudocerastes persicus</i>           | NO       | YES      | LC    |

\* Not available on the web

| Ras Al Shajer    |                                      |          |          |       |
|------------------|--------------------------------------|----------|----------|-------|
| Taxa             | Family/Specie                        | Endemics | Venomous | Total |
| <b>Lizards</b>   |                                      | 0        | 0        | 3     |
| <b>Geckos</b>    |                                      | 0        | 0        | 2     |
|                  | Phyllodactylidae                     |          |          |       |
|                  | <i>Ptyodactylus orlovi</i>           | NO       | NO       | NE    |
|                  | Sphaerodactylidae                    |          |          |       |
|                  | <i>Pristurus rupestris rupestris</i> | NO       | NO       | NE    |
| <b>Lacertids</b> |                                      | 0        | 0        | 1     |
|                  | Lacertidae                           |          |          |       |
|                  | <i>Omanosaura jayakari</i>           | NO       | NO       | LC    |
| <b>Snakes</b>    |                                      | 0        | 0        | 0     |

\* Not available on the web



## S119: Species list by protected areas

## Al Saleel, Turtle Reserve &amp; Jebel Qahwan

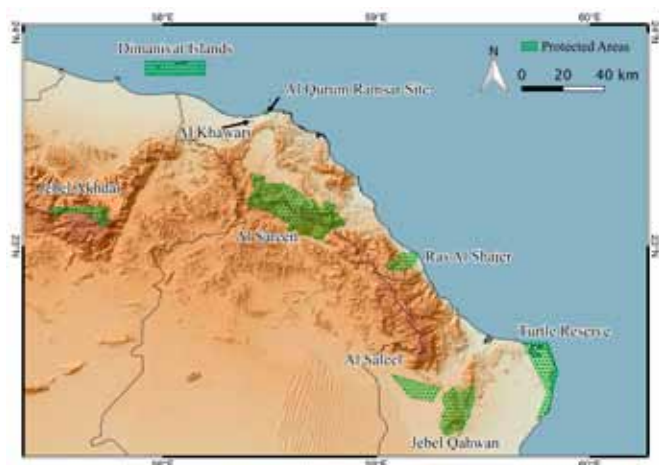

| Al Saleel        |                                      |          |          |          |
|------------------|--------------------------------------|----------|----------|----------|
| Taxa             | Family/Specie                        | Endemics | Venomous | Total    |
| <b>Lizards</b>   |                                      | <b>0</b> | <b>0</b> | <b>6</b> |
| <b>Geckos</b>    |                                      | <b>0</b> | <b>0</b> | <b>4</b> |
|                  | Gekkonidae                           |          |          |          |
|                  | <i>Bunopus tuberculatus</i>          | NO       | NO       | LC       |
|                  | <i>Hemidactylus robustus</i>         | NO       | NO       | LC*      |
|                  | <i>Stenodactylus leptocosymbotes</i> | NO       | NO       | LC*      |
|                  | Sphaerodactylidae                    |          |          |          |
|                  | <i>Pristurus minimus</i>             | NO       | NO       | LC       |
| <b>Lacertids</b> |                                      | <b>0</b> | <b>0</b> | <b>1</b> |
|                  | Lacertidae                           |          |          |          |
|                  | <i>Mesalina adramitana</i>           | NO       | NO       | LC       |
| <b>Skinks</b>    |                                      | <b>0</b> | <b>0</b> | <b>1</b> |
|                  | Scincidae                            |          |          |          |
|                  | <i>Scincus mitranus</i>              | NO       | NO       | LC       |
| <b>Snakes</b>    |                                      | <b>0</b> | <b>0</b> | <b>2</b> |
|                  | Colubridae                           |          |          |          |
|                  | <i>Lytorhynchus diadema diadema</i>  | NO       | NO       | LC       |
|                  | <i>Telescopus dhara dhara</i>        | NO       | NO       | LC*      |

\* Not available on the web

| Turtle Reserve       |                                         |          |          |           |
|----------------------|-----------------------------------------|----------|----------|-----------|
| Taxa                 | Family/Specie                           | Endemics | Venomous | Total     |
| <b>Lizards</b>       |                                         | <b>2</b> | <b>0</b> | <b>12</b> |
| <b>Geckos</b>        |                                         | <b>2</b> | <b>0</b> | <b>8</b>  |
|                      | Gekkonidae                              |          |          |           |
|                      | <i>Hemidactylus flaviviridis</i>        | NO       | NO       | LC*       |
|                      | <i>Hemidactylus hajarensis</i>          | YES      | NO       | NE        |
|                      | <i>Hemidactylus minutus</i>             | NO       | NO       | NE        |
|                      | <i>Stenodactylus leptocosymbotes</i>    | NO       | NO       | LC*       |
|                      | <i>Trachydactylus hajarensis</i>        | NO       | NO       | NE        |
|                      | Sphaerodactylidae                       |          |          |           |
|                      | <i>Pristurus carteri</i>                | NO       | NO       | LC        |
|                      | <i>Pristurus minimus</i>                | NO       | NO       | LC        |
|                      | <i>Pristurus</i> sp. 5                  | YES      | NO       | NE        |
| <b>Lacertids</b>     |                                         | <b>0</b> | <b>0</b> | <b>2</b>  |
|                      | Lacertidae                              |          |          |           |
|                      | <i>Acanthodactylus schmidti</i>         | NO       | NO       | LC        |
|                      | <i>Mesalina adramitana</i>              | NO       | NO       | LC        |
| <b>Skinks</b>        |                                         | <b>0</b> | <b>0</b> | <b>1</b>  |
|                      | Scincidae                               |          |          |           |
|                      | <i>Chalcides ocellatus ocellatus</i>    | NO       | NO       | LC*       |
| <b>Amphisbaenids</b> |                                         | <b>0</b> | <b>0</b> | <b>1</b>  |
|                      | Trogonophidae                           |          |          |           |
|                      | <i>Diplometopon zarudnyi</i>            | NO       | NO       | LC        |
| <b>Snakes</b>        |                                         | <b>0</b> | <b>2</b> | <b>5</b>  |
|                      | Colubridae                              |          |          |           |
|                      | <i>Telescopus dhara dhara</i>           | NO       | NO       | LC*       |
|                      | Lamprophiidae                           |          |          |           |
|                      | <i>Psammophis schokari</i>              | NO       | NO       | LC*       |
|                      | Leptotyphlopidae                        |          |          |           |
|                      | <i>Myriopholis macrorhyncha</i>         | NO       | NO       | LC*       |
|                      | Viperidae                               |          |          |           |
|                      | <i>Cerastes gasperettii gasperettii</i> | NO       | YES      | LC        |
|                      | <i>Echis carinatus sochureki</i>        | NO       | YES      | LC*       |

\* Not available on the web

| Jebel Qahwan   |                                   |          |          |          |
|----------------|-----------------------------------|----------|----------|----------|
| Taxa           | Family/Specie                     | Endemics | Venomous | Total    |
| <b>Lizards</b> |                                   | <b>2</b> | <b>0</b> | <b>4</b> |
| <b>Agamids</b> |                                   | <b>0</b> | <b>0</b> | <b>1</b> |
|                | Agamidae                          |          |          |          |
|                | <i>Pseudotrapelus jensvindumi</i> | NO       | NO       | NE       |
| <b>Geckos</b>  |                                   | <b>2</b> | <b>0</b> | <b>3</b> |
|                | Gekkonidae                        |          |          |          |
|                | <i>Hemidactylus hajarensis</i>    | YES      | NO       | NE       |
|                | Phyllodactylidae                  |          |          |          |
|                | <i>Asaccus</i> sp.                | YES      | NO       | NE       |
|                | <i>Pyodactylus orlovi</i>         | NO       | NO       | NE       |
| <b>Snakes</b>  |                                   | <b>0</b> | <b>0</b> | <b>0</b> |

\* Not available on the web

## Al Wusta Wetland Reserve, Al Wusta Wildlife Sanctuary & Jabal Samhan

## S120: Species list by protected areas

| Al Wusta Wetland Reserve |                                         |          |          |           |
|--------------------------|-----------------------------------------|----------|----------|-----------|
| Taxa                     | Family/Specie                           | Endemics | Venomous | Total     |
| <b>Lizards</b>           |                                         | <b>3</b> | <b>0</b> | <b>13</b> |
| <b>Agamids</b>           |                                         | <b>1</b> | <b>0</b> | <b>2</b>  |
|                          | Agamidae                                |          |          |           |
|                          | <i>Phrynocephalus maculatus</i>         | NO       | NO       | LC*       |
|                          | <i>Phrynocephalus sakoii</i>            | YES      | NO       | NE        |
| <b>Geckos</b>            |                                         | <b>1</b> | <b>0</b> | <b>8</b>  |
|                          | Gekkonidae                              |          |          |           |
|                          | <i>Hemidactylus robustus</i>            | NO       | NO       | LC*       |
|                          | <i>Pseudoceramodactylus khobarensis</i> | NO       | NO       | LC        |
|                          | <i>Stenodactylus doriae</i>             | NO       | NO       | LC        |
|                          | <i>Stenodactylus leptocosymbotes</i>    | NO       | NO       | LC*       |
|                          | <i>Stenodactylus sharqiyahensis</i>     | YES      | NO       | NE        |
|                          | Sphaerodactylidae                       |          |          |           |
|                          | <i>Pristurus carteri</i>                | NO       | NO       | LC        |
|                          | <i>Pristurus minimus</i>                | NO       | NO       | LC        |
|                          | <i>Pristurus</i> sp. 1                  | NO       | NO       | NE        |
| <b>Lacertids</b>         |                                         | <b>1</b> | <b>0</b> | <b>3</b>  |
|                          | Lacertidae                              |          |          |           |
|                          | <i>Acanthodactylus masirae</i>          | YES      | NO       | DD        |
|                          | <i>Acanthodactylus schmidti</i>         | NO       | NO       | LC        |
|                          | <i>Mesalina adramitana</i>              | NO       | NO       | LC        |
| <b>Snakes</b>            |                                         | <b>0</b> | <b>0</b> | <b>0</b>  |

\* Not available on the web

| Al Wusta Wildlife Sanctuary |                                         |          |          |           |
|-----------------------------|-----------------------------------------|----------|----------|-----------|
| Taxa                        | Family/Specie                           | Endemics | Venomous | Total     |
| <b>Lizards</b>              |                                         | <b>1</b> | <b>0</b> | <b>14</b> |
| <b>Agamids</b>              |                                         | <b>1</b> | <b>0</b> | <b>3</b>  |
|                             | Agamidae                                |          |          |           |
|                             | <i>Trapelus flavimaculatus</i>          | NO       | NO       | LC        |
|                             | <i>Uromastyx aegyptia microlepis</i>    | NO       | NO       | VU        |
|                             | <i>Uromastyx thomasi</i>                | YES      | NO       | VU        |
| <b>Geckos</b>               |                                         | <b>0</b> | <b>0</b> | <b>7</b>  |
|                             | Gekkonidae                              |          |          |           |
|                             | <i>Bunopus tuberculatus</i>             | NO       | NO       | LC        |
|                             | <i>Hemidactylus robustus</i>            | NO       | NO       | LC*       |
|                             | <i>Stenodactylus leptocosymbotes</i>    | NO       | NO       | LC*       |
|                             | <i>Trachydactylus hajarensis</i>        | NO       | NO       | NE        |
|                             | Sphaerodactylidae                       |          |          |           |
|                             | <i>Pristurus carteri</i>                | NO       | NO       | LC        |
|                             | <i>Pristurus minimus</i>                | NO       | NO       | LC        |
|                             | <i>Pristurus</i> sp. 1                  | NO       | NO       | NE        |
| <b>Lacertids</b>            |                                         | <b>0</b> | <b>0</b> | <b>1</b>  |
|                             | Lacertidae                              |          |          |           |
|                             | <i>Mesalina adramitana</i>              | NO       | NO       | LC        |
| <b>Skinks</b>               |                                         | <b>0</b> | <b>0</b> | <b>1</b>  |
|                             | Scincidae                               |          |          |           |
|                             | <i>Scincus mitranus</i>                 | NO       | NO       | LC        |
| <b>Amphisbaenids</b>        |                                         | <b>0</b> | <b>0</b> | <b>1</b>  |
|                             | Trogonophidae                           |          |          |           |
|                             | <i>Diplometopon zarudnyi</i>            | NO       | NO       | LC        |
| <b>Varanids</b>             |                                         | <b>0</b> | <b>0</b> | <b>1</b>  |
|                             | Varanidae                               |          |          |           |
|                             | <i>Varanus griseus</i>                  | NO       | NO       | LC*       |
| <b>Snakes</b>               |                                         | <b>0</b> | <b>3</b> | <b>7</b>  |
|                             | Boidae                                  |          |          |           |
|                             | <i>Eryx jayakari</i>                    | NO       | NO       | LC        |
|                             | Colubridae                              |          |          |           |
|                             | <i>Telescopus dhara dhara</i>           | NO       | NO       | LC*       |
|                             | Lamprophiidae                           |          |          |           |
|                             | <i>Psammophis schokari</i>              | NO       | NO       | LC*       |
|                             | <i>Rhagerhis moilensis</i>              | NO       | NO       | LC*       |
|                             | Viperidae                               |          |          |           |
|                             | <i>Cerastes gasperettii gasperettii</i> | NO       | YES      | LC        |
|                             | <i>Echis carinatus sochureki</i>        | NO       | YES      | LC*       |
|                             | <i>Echis coloratus</i>                  | NO       | YES      | LC*       |

\* Not available on the web

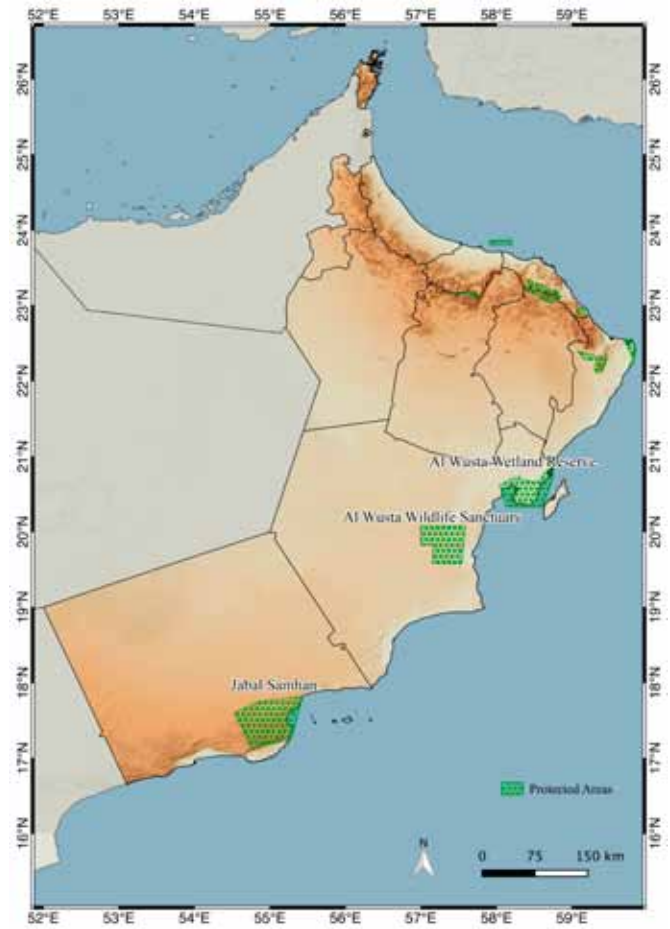

| Jabal Samhan     |                                          |          |          |           |
|------------------|------------------------------------------|----------|----------|-----------|
| Taxa             | Family/Specie                            | Endemics | Venomous | Total     |
| <b>Lizards</b>   |                                          | <b>1</b> | <b>0</b> | <b>11</b> |
| <b>Agamids</b>   |                                          | <b>0</b> | <b>0</b> | <b>2</b>  |
|                  | Agamidae                                 |          |          |           |
|                  | <i>Pseudotrapelus dhofarensis</i>        | NO       | NO       | NE        |
|                  | Chamaeleonidae                           |          |          |           |
|                  | <i>Chamaeleo arabicus</i>                | NO       | NO       | LC        |
| <b>Geckos</b>    |                                          | <b>1</b> | <b>0</b> | <b>6</b>  |
|                  | Gekkonidae                               |          |          |           |
|                  | <i>Hemidactylus alkiyumii</i>            | NO       | NO       | NE        |
|                  | <i>Hemidactylus paucituberculatus</i>    | YES      | NO       | NE        |
|                  | <i>Tropicolotes scortecii</i>            | NO       | NO       | LC        |
|                  | Phyllodactylidae                         |          |          |           |
|                  | <i>Ptyodactylus dhofarensis</i>          | NO       | NO       | NE        |
|                  | Sphaerodactylidae                        |          |          |           |
|                  | <i>Pristurus carteri</i>                 | NO       | NO       | LC        |
|                  | <i>Pristurus</i> sp. 1                   | NO       | NO       | NE        |
| <b>Lacertids</b> |                                          | <b>0</b> | <b>0</b> | <b>2</b>  |
|                  | Lacertidae                               |          |          |           |
|                  | <i>Acanthodactylus felicis</i>           | NO       | NO       | VU        |
|                  | <i>Mesalina</i> sp. 1                    | NO       | NO       | NE        |
| <b>Skinks</b>    |                                          | <b>0</b> | <b>0</b> | <b>1</b>  |
|                  | Scincidae                                |          |          |           |
|                  | <i>Trachylepis tessellata</i>            | NO       | NO       | LC        |
| <b>Snakes</b>    |                                          | <b>0</b> | <b>2</b> | <b>6</b>  |
|                  | Colubridae                               |          |          |           |
|                  | <i>Platyceps rhodorachis rhodorachis</i> | NO       | NO       | LC*       |
|                  | <i>Platyceps thomasi</i>                 | NO       | NO       | DD        |
|                  | <i>Spalerosophis diadema cliffordii</i>  | NO       | NO       | LC*       |
|                  | Elapidae                                 |          |          |           |
|                  | <i>Naja arabica</i>                      | NO       | YES      | LC        |
|                  | Lamprophiidae                            |          |          |           |
|                  | <i>Psammophis schokari</i>               | NO       | NO       | LC*       |
|                  | Viperidae                                |          |          |           |
|                  | <i>Echis khosatzkii</i>                  | NO       | YES      | LC        |

\* Not available on the web

## S121: Species list by protected areas

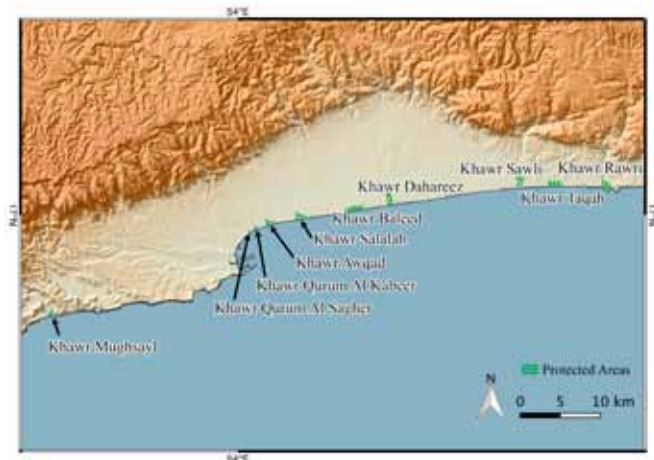

| Khawr Rawri |                                       |          |          |       |
|-------------|---------------------------------------|----------|----------|-------|
| Taxa        | Family/Specie                         | Endemics | Venomous | Total |
| Lizards     |                                       | 1        | 0        | 5     |
| Agamids     |                                       | 0        | 0        | 1     |
|             | Agamidae                              |          |          |       |
|             | <i>Pseudotrapelus dhofarensis</i>     | NO       | NO       | NE    |
| Geckos      |                                       | 1        | 0        | 4     |
|             | Gekkonidae                            |          |          |       |
|             | <i>Hemidactylus alkiyumii</i>         | NO       | NO       | NE    |
|             | <i>Hemidactylus paucituberculatus</i> | YES      | NO       | NE    |
|             | Sphaerodactylidae                     |          |          |       |
|             | <i>Pristurus carteri</i>              | NO       | NO       | LC    |
|             | <i>Pristurus</i> sp. 1                | NO       | NO       | NE    |
| Snakes      |                                       | 0        | 0        | 0     |

\* Not available on the web

| Khawr Taqah |               |          |          |       |
|-------------|---------------|----------|----------|-------|
| Taxa        | Family/Specie | Endemics | Venomous | Total |
| Lizards     |               | 0        | 0        | 0     |
| Snakes      |               | 0        | 0        | 0     |

\* Not available on the web

| Khawr Dahareez |                                   |          |          |       |
|----------------|-----------------------------------|----------|----------|-------|
| Taxa           | Family/Specie                     | Endemics | Venomous | Total |
| Lizards        |                                   | 0        | 0        | 4     |
| Agamids        |                                   | 0        | 0        | 1     |
|                | Agamidae                          |          |          |       |
|                | <i>Pseudotrapelus dhofarensis</i> | NO       | NO       | NE    |
| Geckos         |                                   | 0        | 0        | 3     |
|                | Gekkonidae                        |          |          |       |
|                | <i>Hemidactylus robustus</i>      | NO       | NO       | LC*   |
|                | <i>Trachydactylus spatalurus</i>  | NO       | NO       | NE    |
|                | Sphaerodactylidae                 |          |          |       |
|                | <i>Pristurus carteri</i>          | NO       | NO       | LC    |
| Snakes         |                                   | 0        | 0        | 2     |
|                | Leptotyphlopidae                  |          |          |       |
|                | <i>Myriopholis macrorhyncha</i>   | NO       | NO       | LC*   |
|                | <i>Myriopholis nursii</i>         | NO       | NO       | LC*   |

\* Not available on the web

## Khawr Rawri, Khawr Taqah, Khawr Sawli, Khawr Dahareez, Khawr Baleed, Khawr Salalah, Khawr Awqad, Khawr Qurum Al Kabeer, Khawr Qurum Al Sagher & Khawr Mughsayl

| Khawr Sawli |               |          |          |       |
|-------------|---------------|----------|----------|-------|
| Taxa        | Family/Specie | Endemics | Venomous | Total |
| Lizards     |               | 0        | 0        | 0     |
| Snakes      |               | 0        | 0        | 0     |

\* Not available on the web

| Khawr Baleed |               |          |          |       |
|--------------|---------------|----------|----------|-------|
| Taxa         | Family/Specie | Endemics | Venomous | Total |
| Lizards      |               | 0        | 0        | 0     |
| Snakes       |               | 0        | 0        | 0     |

\* Not available on the web

| Khawr Salalah |               |          |          |       |
|---------------|---------------|----------|----------|-------|
| Taxa          | Family/Specie | Endemics | Venomous | Total |
| Lizards       |               | 0        | 0        | 0     |
| Snakes        |               | 0        | 0        | 0     |

\* Not available on the web

| Khawr Awqad |               |          |          |       |
|-------------|---------------|----------|----------|-------|
| Taxa        | Family/Specie | Endemics | Venomous | Total |
| Lizards     |               | 0        | 0        | 0     |
| Snakes      |               | 0        | 0        | 0     |

\* Not available on the web

| Khawr Qurum Al Kabeer |               |          |          |       |
|-----------------------|---------------|----------|----------|-------|
| Taxa                  | Family/Specie | Endemics | Venomous | Total |
| Lizards               |               | 0        | 0        | 0     |
| Snakes                |               | 0        | 0        | 0     |

\* Not available on the web

| Khawr Qurum Al Sagher |               |          |          |       |
|-----------------------|---------------|----------|----------|-------|
| Taxa                  | Family/Specie | Endemics | Venomous | Total |
| Lizards               |               | 0        | 0        | 0     |
| Snakes                |               | 0        | 0        | 0     |

\* Not available on the web

| Khawr Mughsayl |               |          |          |       |
|----------------|---------------|----------|----------|-------|
| Taxa           | Family/Specie | Endemics | Venomous | Total |
| Lizards        |               | 0        | 0        | 0     |
| Snakes         |               | 0        | 0        | 0     |

\* Not available on the web



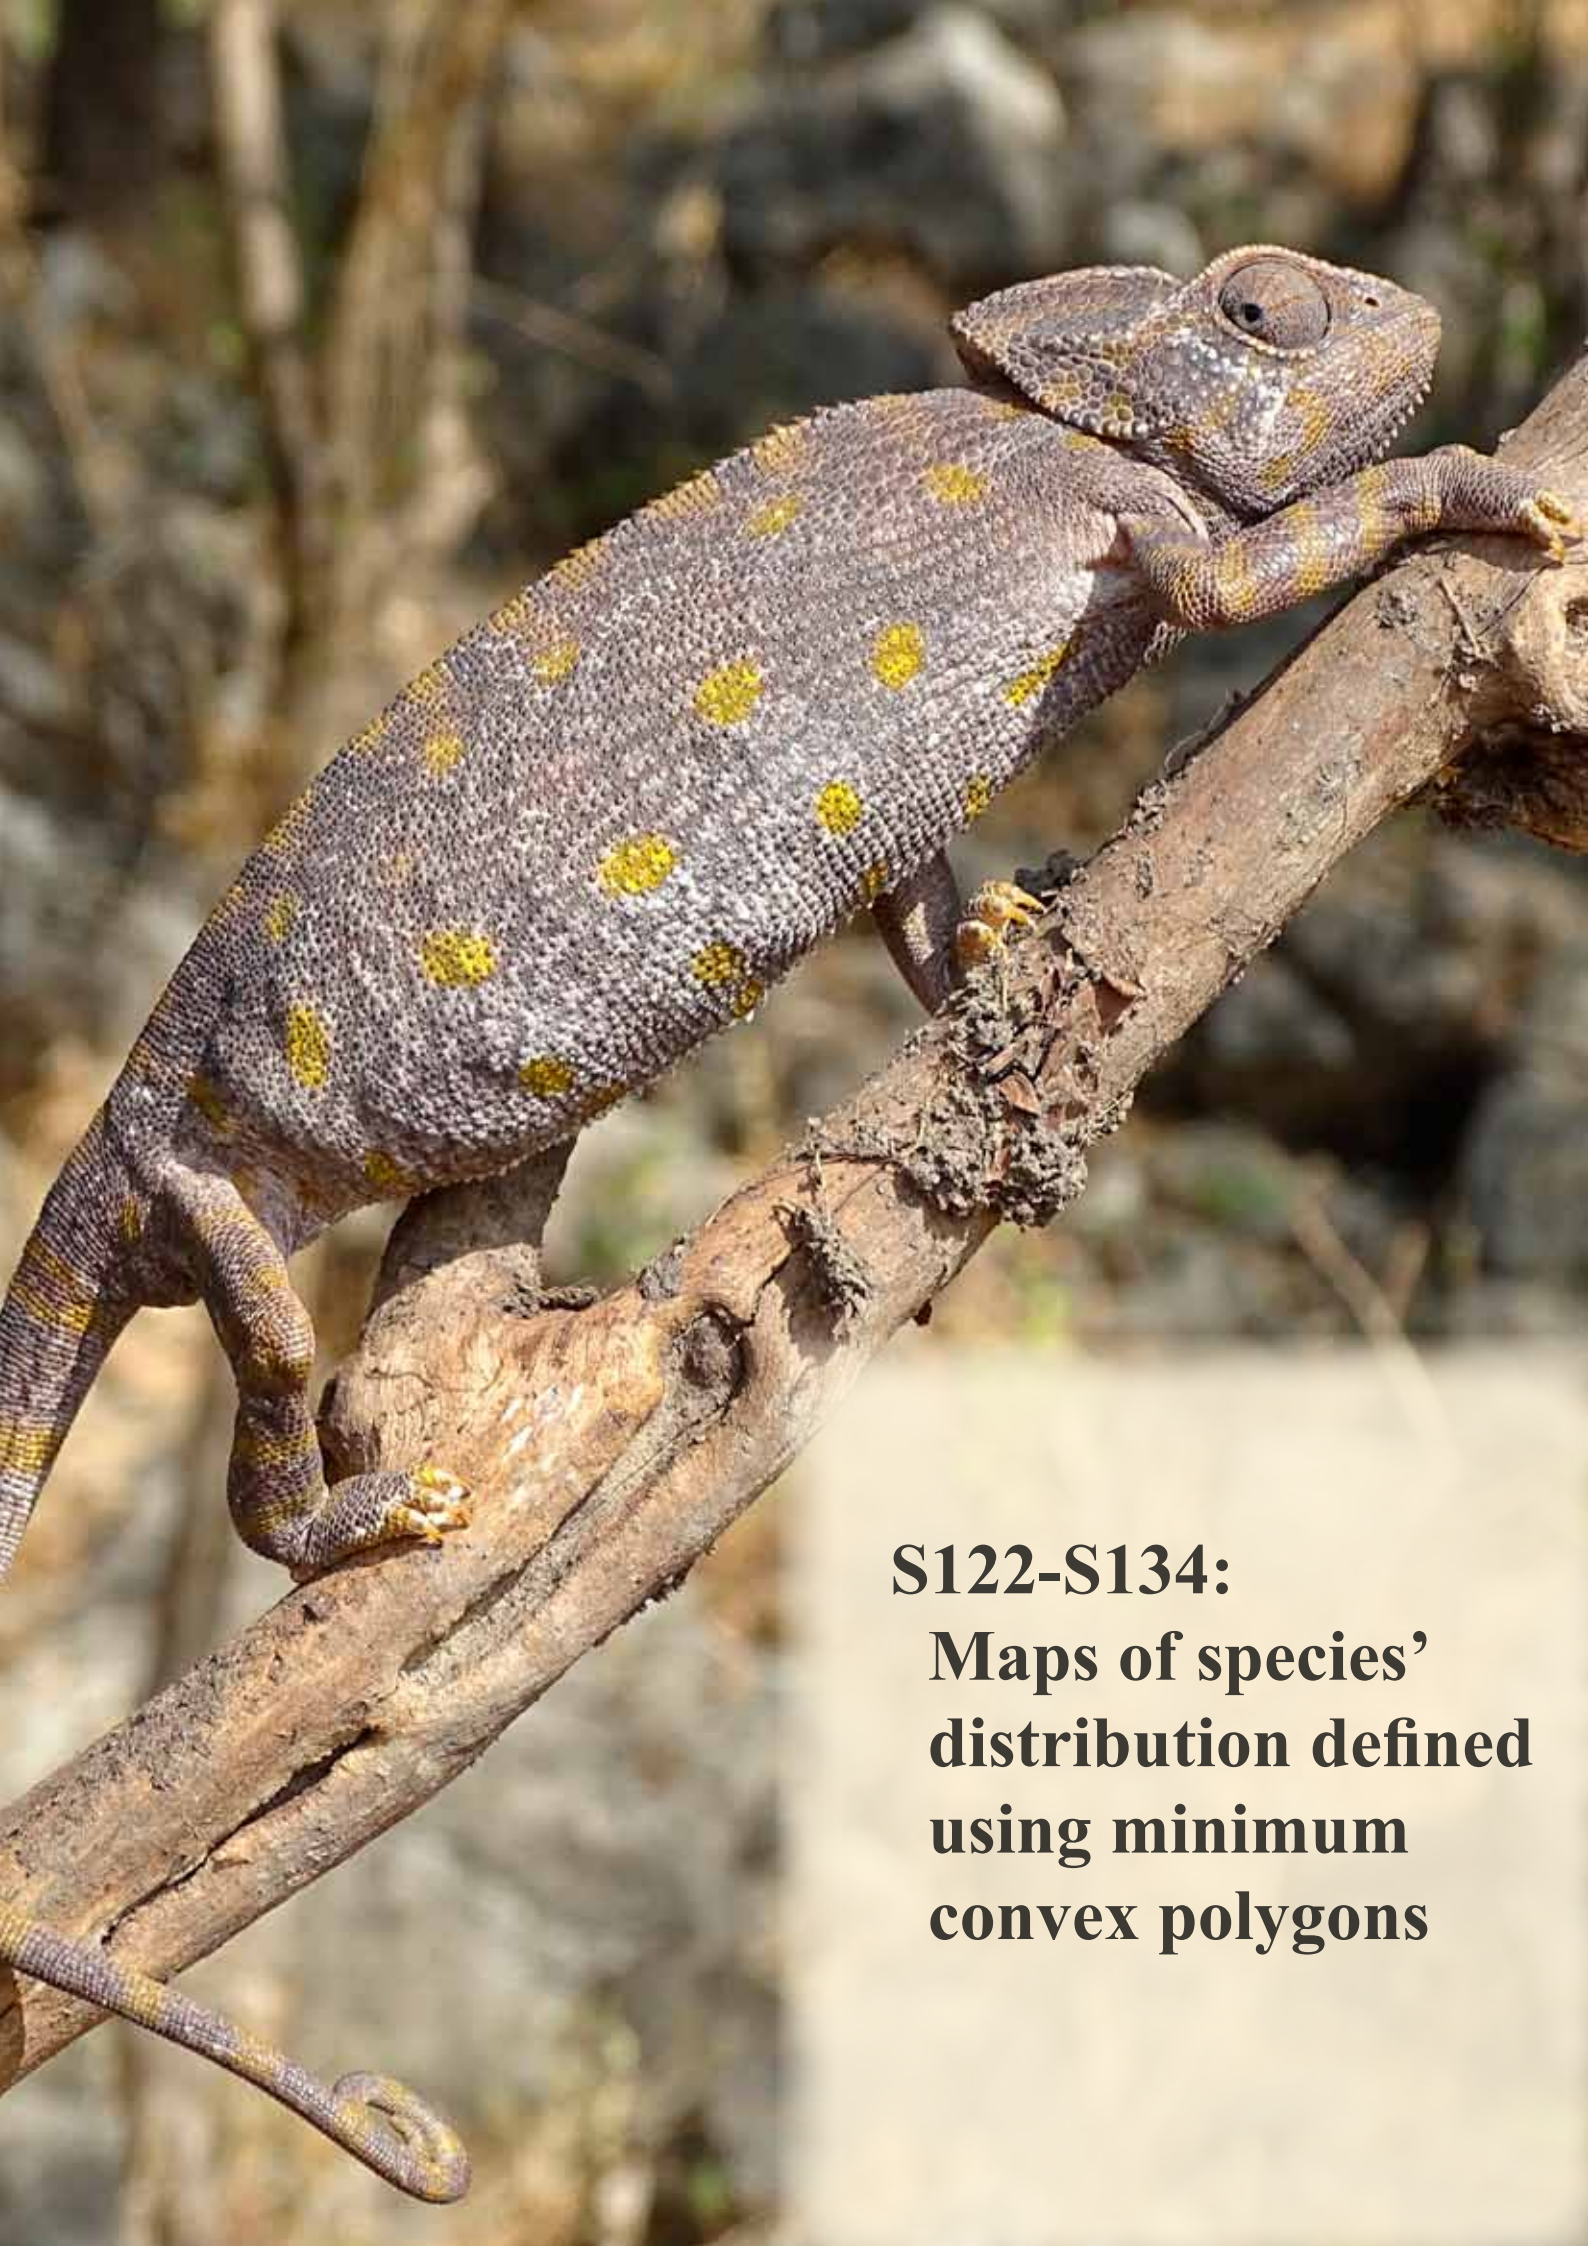

**S122-S134:**

**Maps of species'  
distribution defined  
using minimum  
convex polygons**

## S122-S134: Maps of species' distribution defined using minimum convex polygons

Plates including independent maps for each species showing the 22 protected areas of Oman and the species' distribution area defined using the extent of occurrence with a minimum convex polygon (MCP) of the observations filtered by species' average altitude.

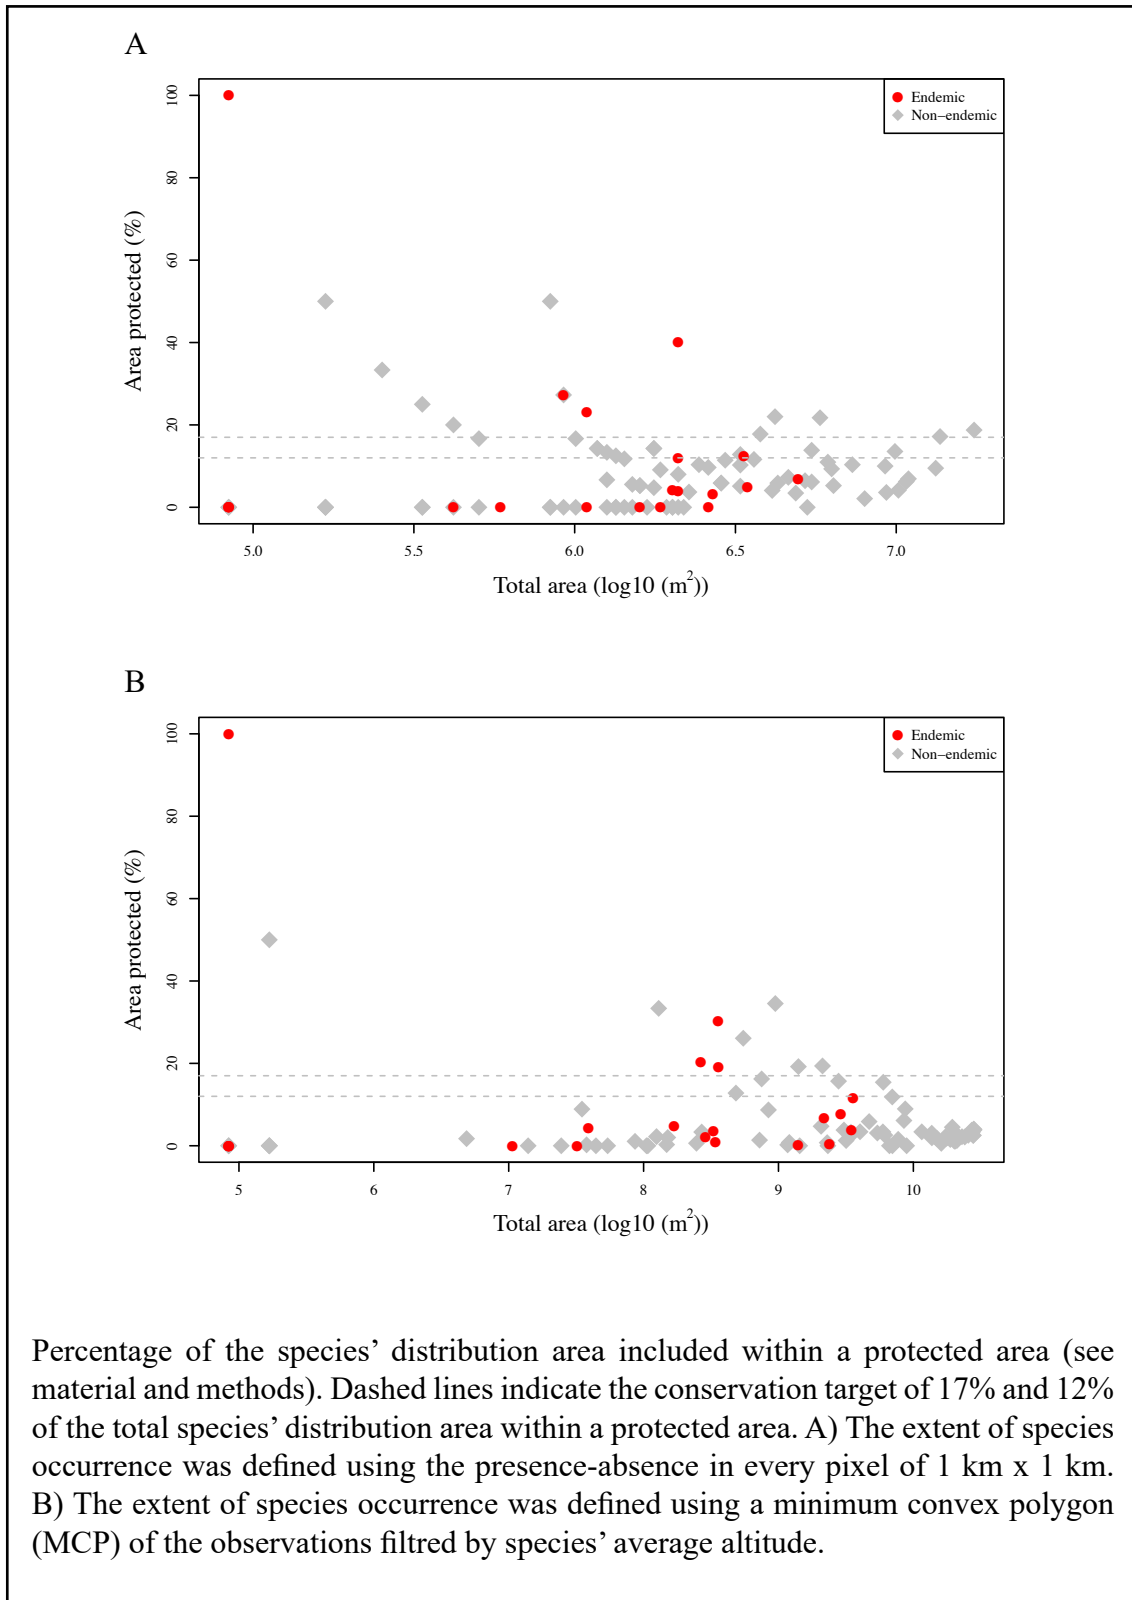

## S122: Maps of species' distribution defined using minimum convex polygons

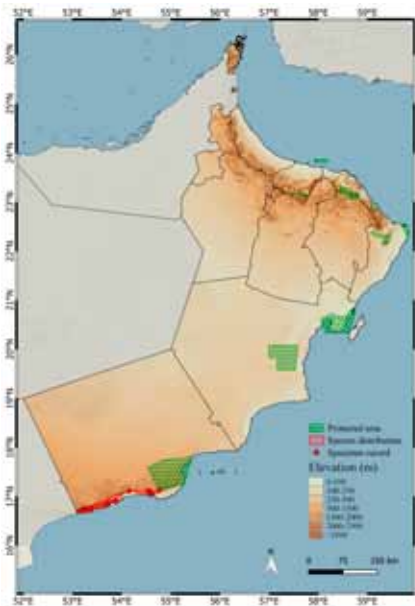*Acanthocercus adramitanus*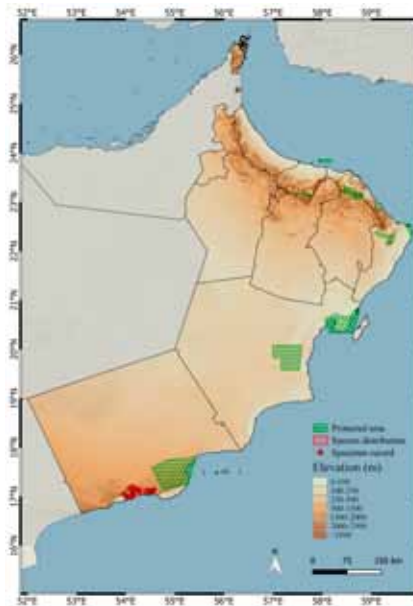*Calotes versicolor*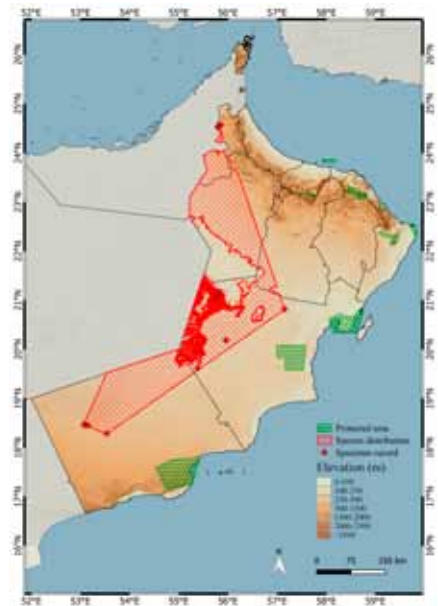*Phrynocephalus arabicus*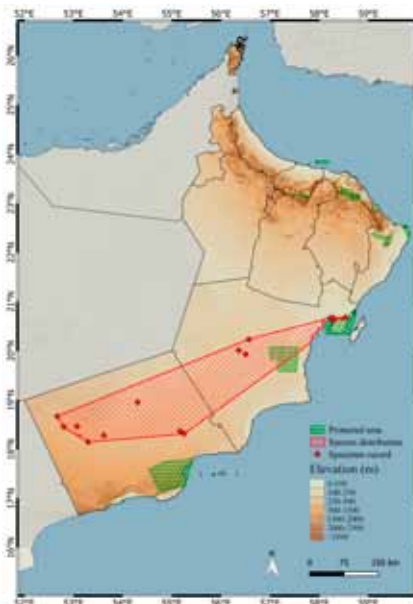*Phrynocephalus maculatus*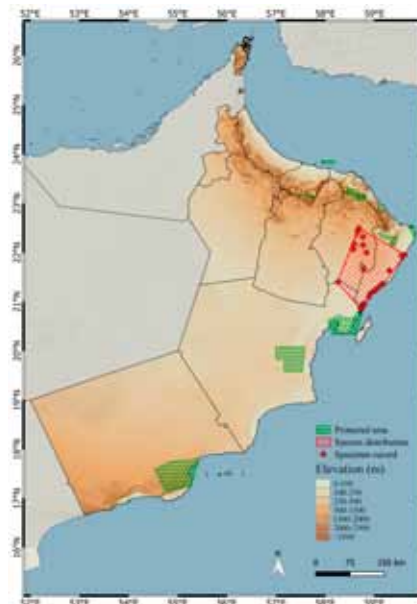*Phrynocephalus sakoii*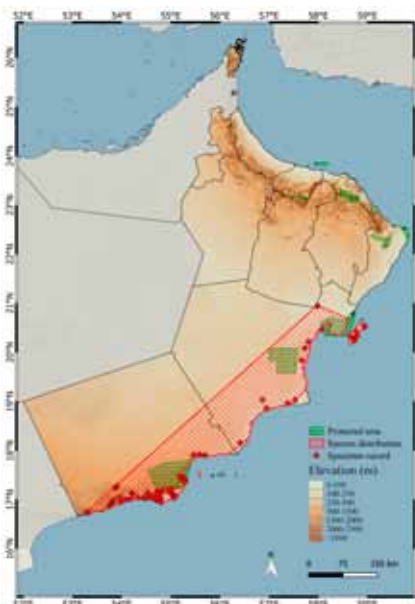*Pseudotrapelus dhofarensis*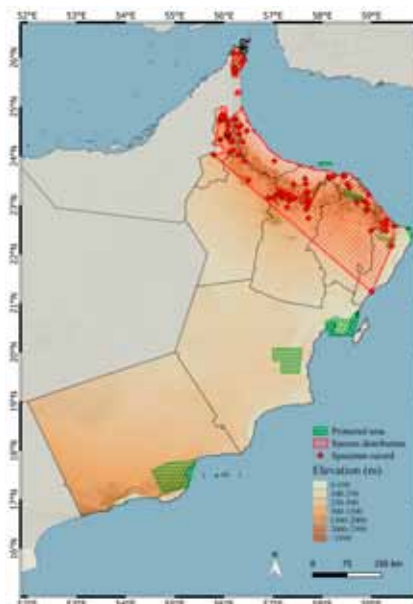*Pseudotrapelus jensvindumi*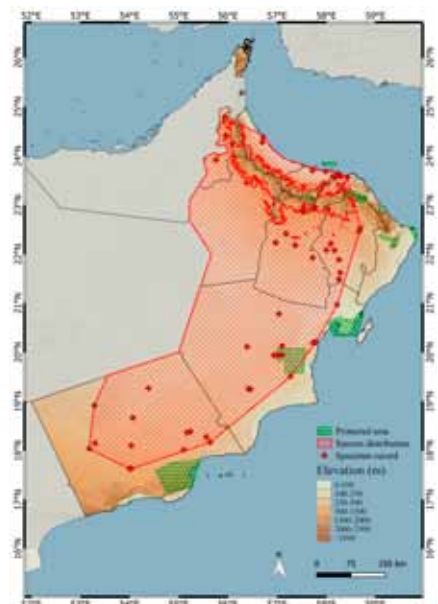*Trapelus flavimaculatus*

**S123: Maps of species' distribution defined using minimum convex polygons**

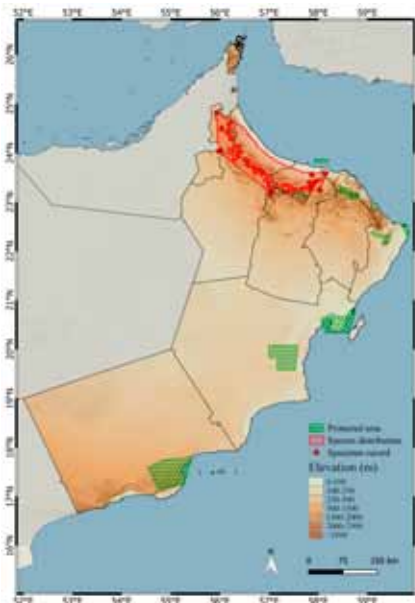

*Uromastyx aegyptia leptieni*

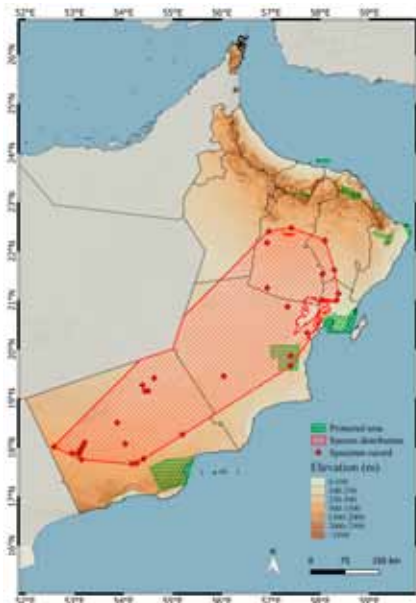

*Uromastyx aegyptia microlepis*

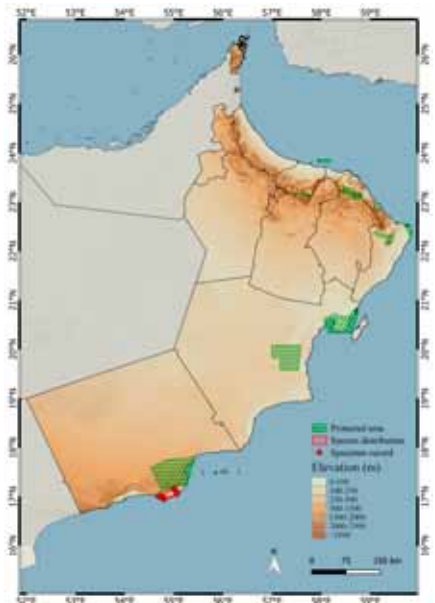

*Uromastyx benti*

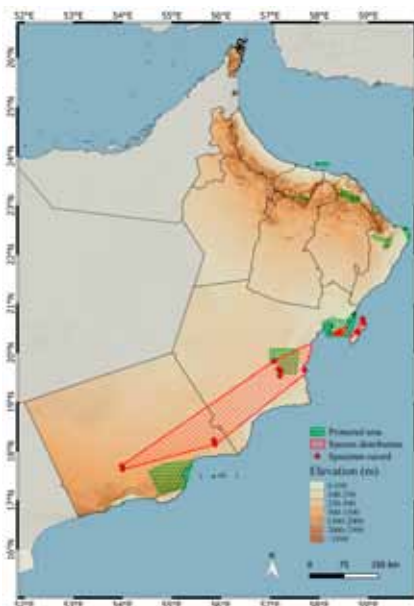

*Uromastyx thomasi*

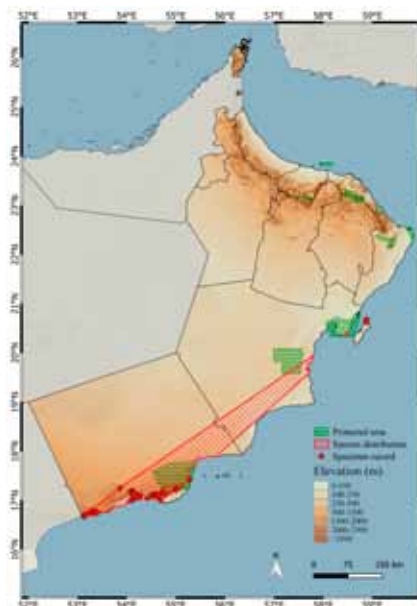

*Chamaeleo arabicus*

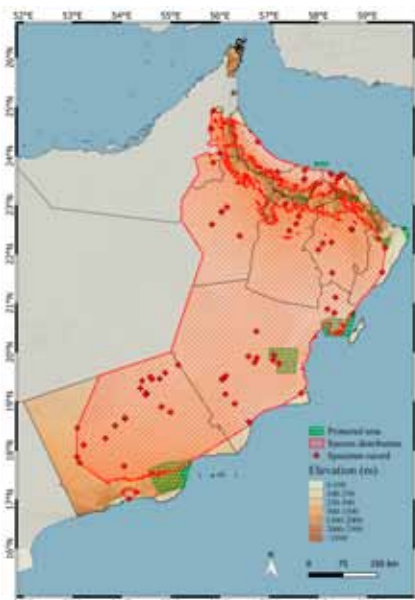

*Bunopus tuberculatus*

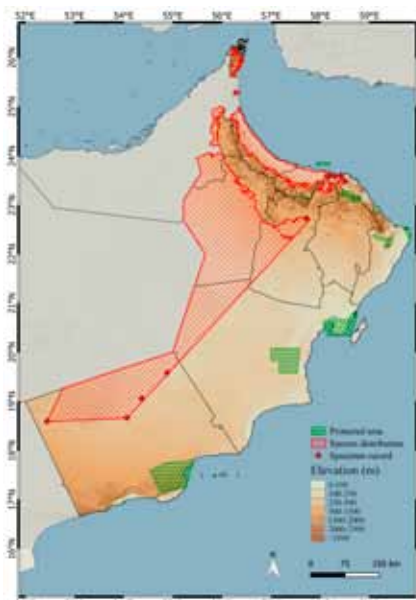

*Cyrtopodion scabrum*

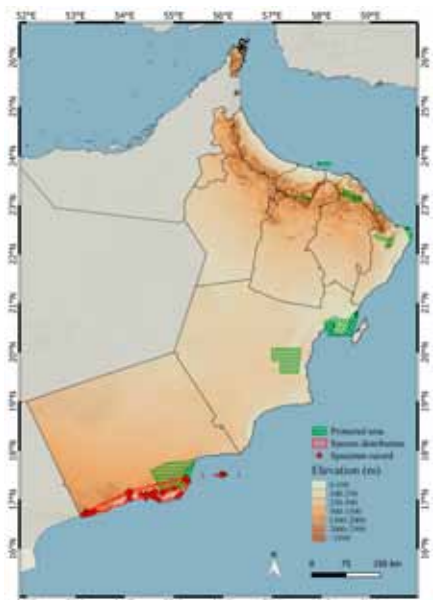

*Hemidactylus alkiyumii*



## S124: Maps of species' distribution defined using minimum convex polygons

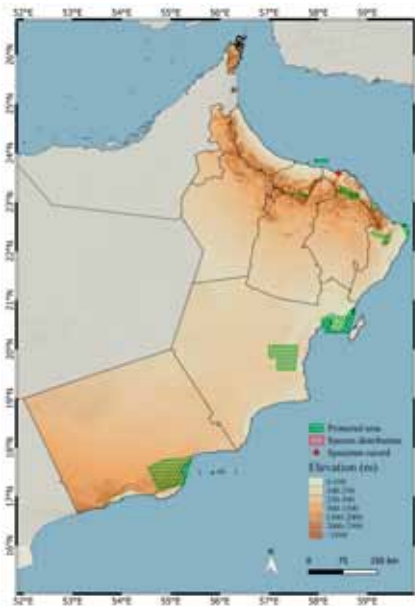*Hemidactylus endophis*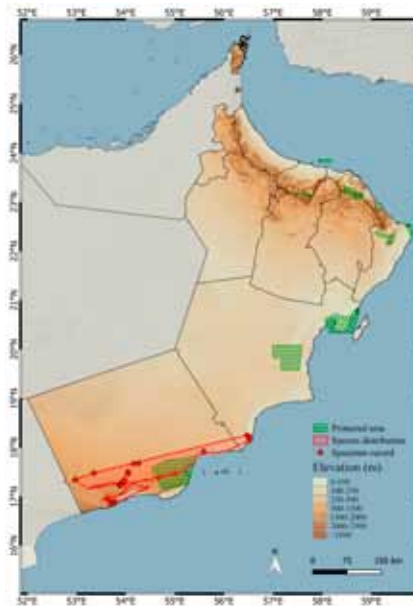*Hemidactylus festivus*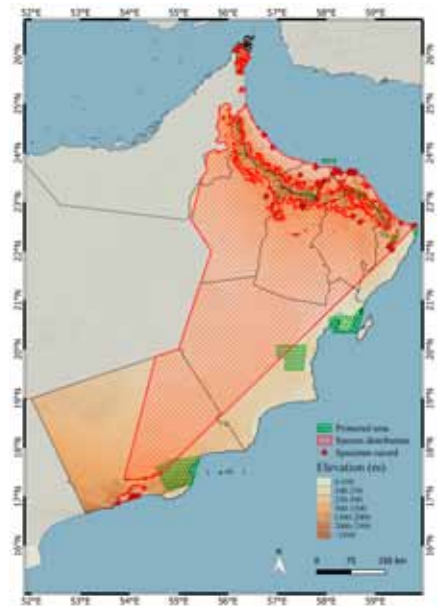*Hemidactylus flaviviridis*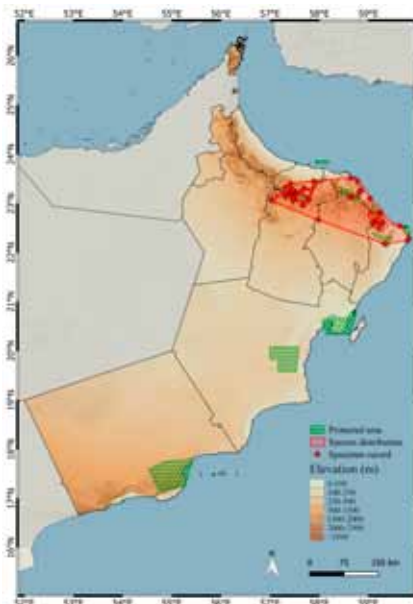*Hemidactylus hajarensis*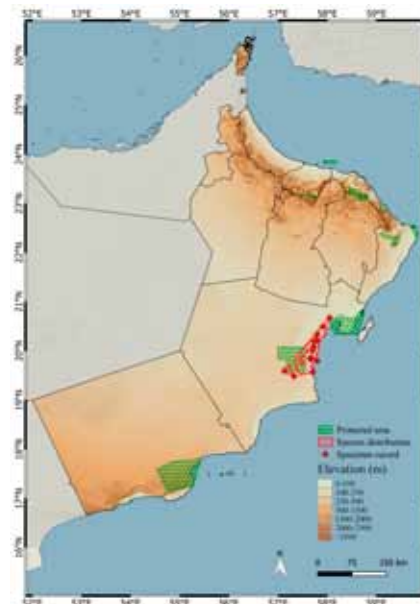*Hemidactylus inexpectatus*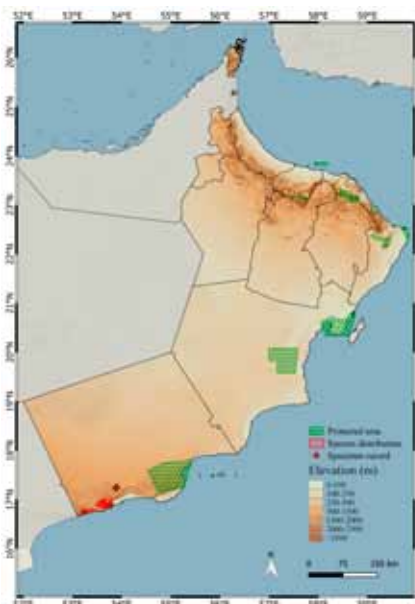*Hemidactylus lemurinus*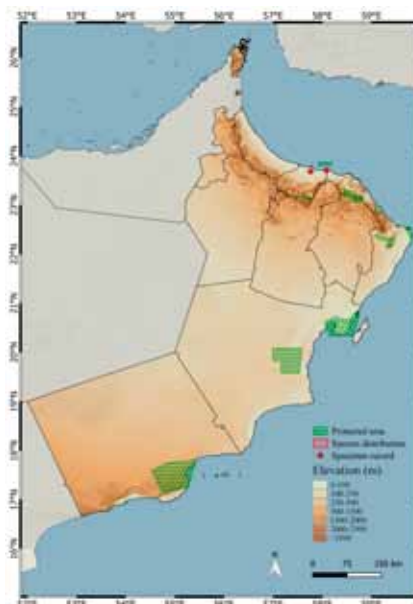*Hemidactylus leschenaultii*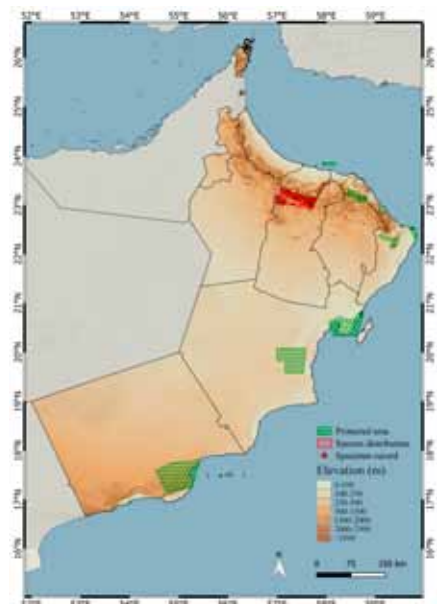*Hemidactylus luqueorum*

**S125: Maps of species' distribution defined using minimum convex polygons**

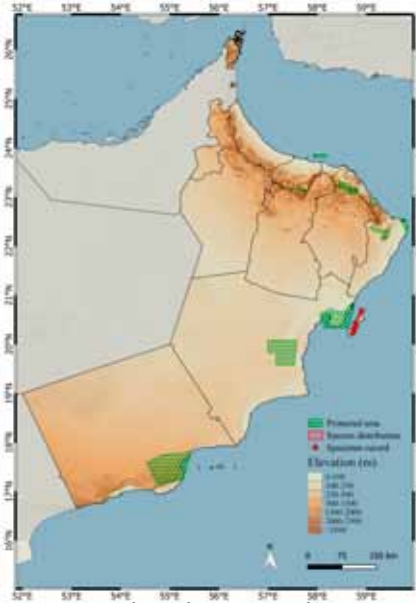

*Hemidactylus masirahensis*

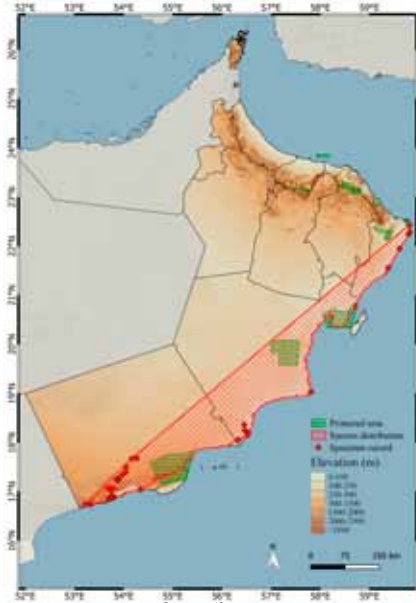

*Hemidactylus minutus*

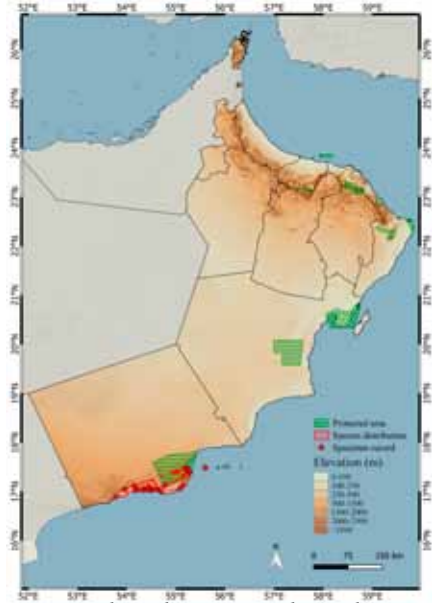

*Hemidactylus paucituberculatus*

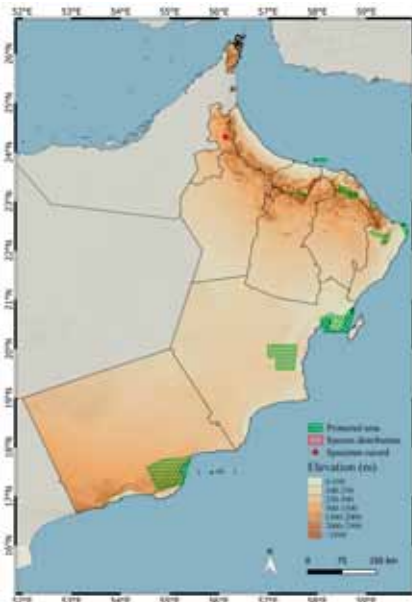

*Hemidactylus persicus*

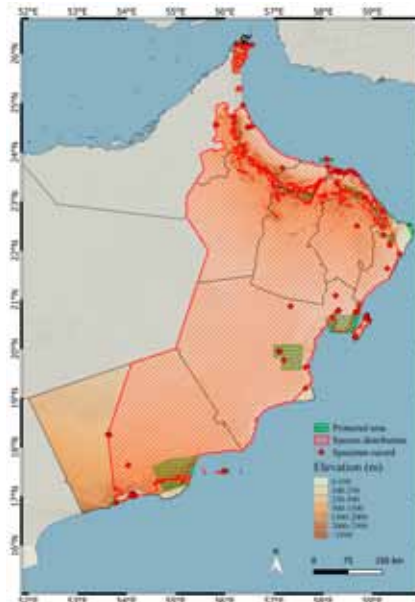

*Hemidactylus robustus*

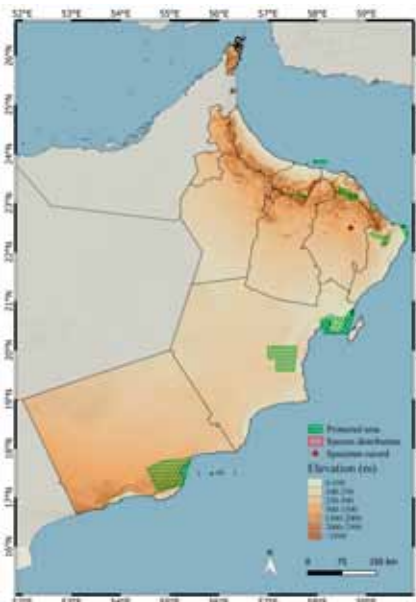

*Hemidactylus sp.*

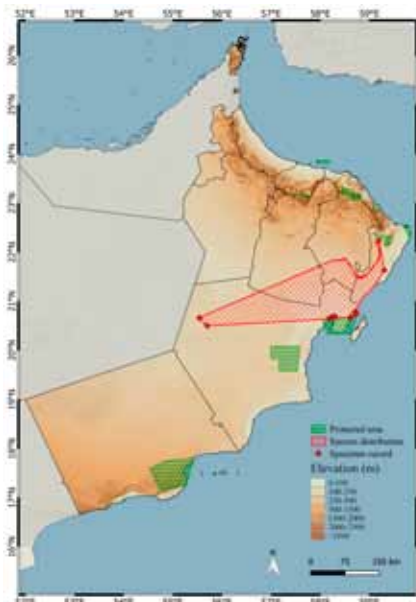

*Pseudoceramodactylus khobarensis*

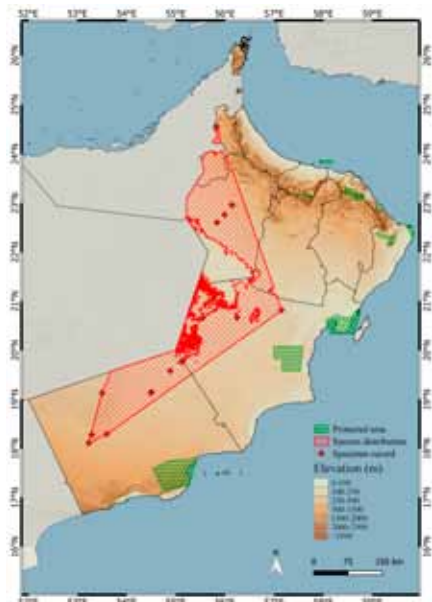

*Stenodactylus arabicus*

## S126: Maps of species' distribution defined using minimum convex polygons

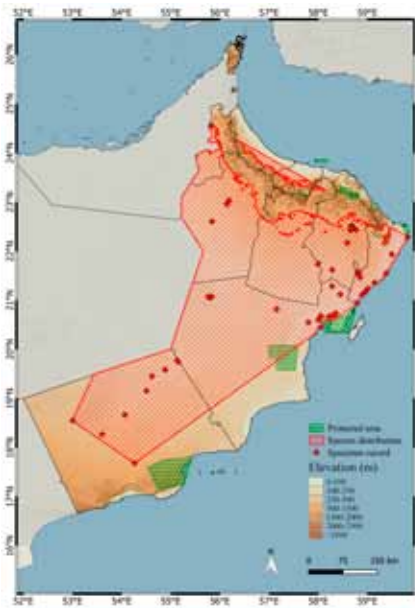*Stenodactylus doriae*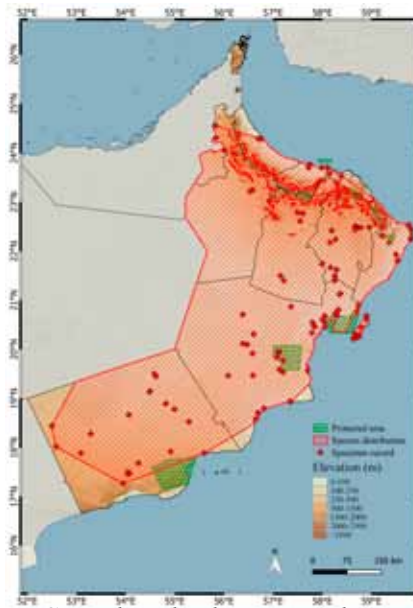*Stenodactylus leptocymbotes*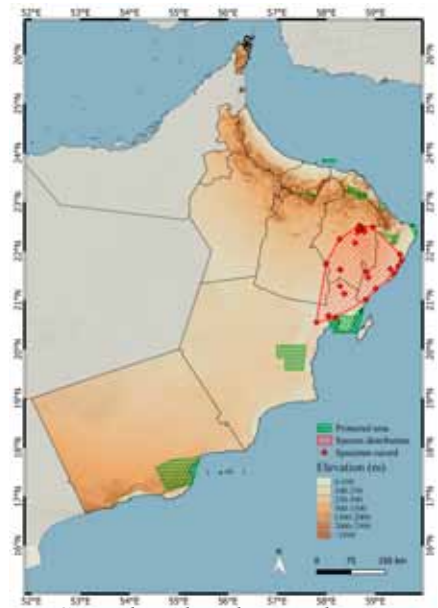*Stenodactylus sharqiyahensis*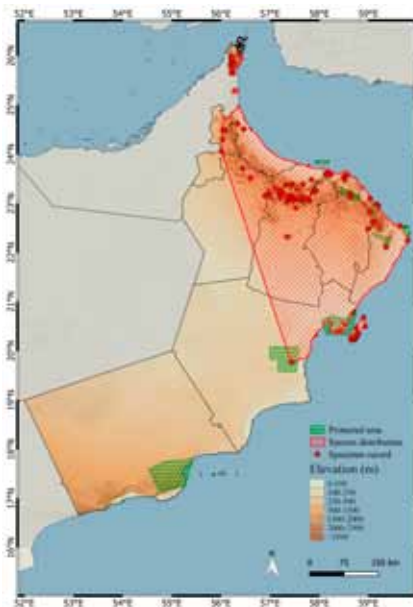*Trachydactylus hajarensis*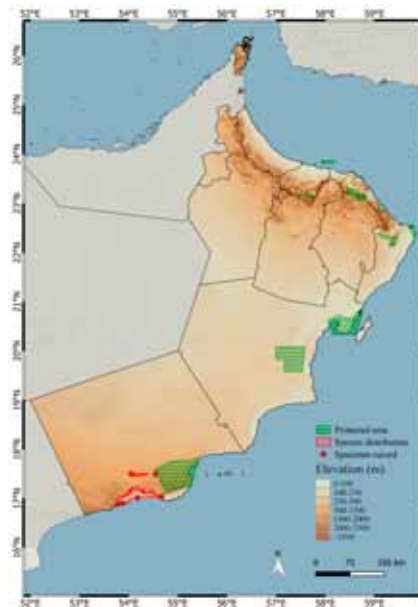*Trachydactylus spatulurus*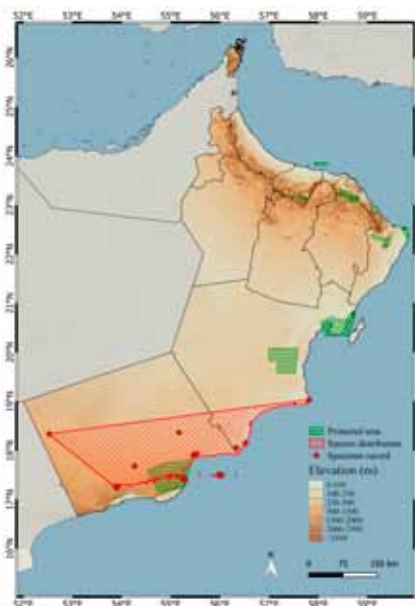*Tropiocolotes scortecchi*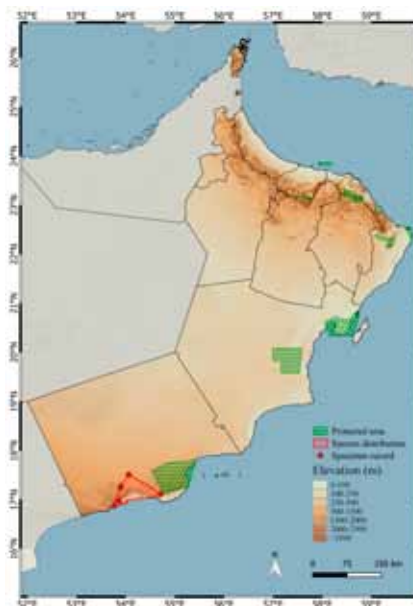*Tropiocolotes sp.*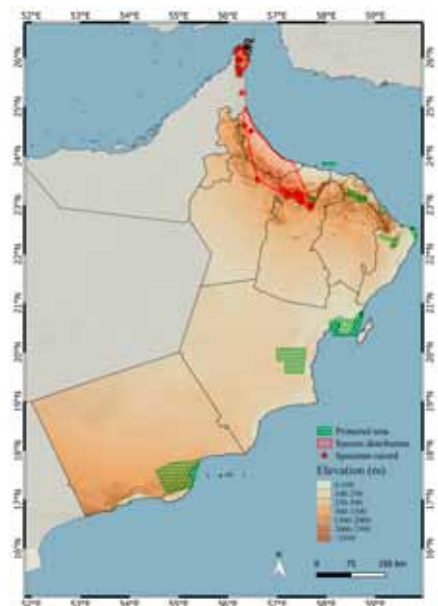*Asaccus gallagheri*

**S127: Maps of species' distribution defined using minimum convex polygons**

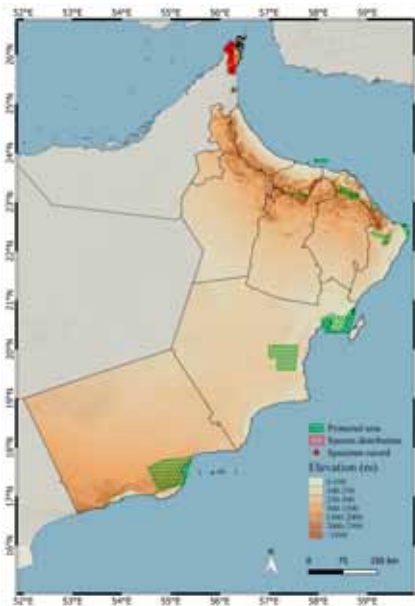

*Asaccus gardneri*

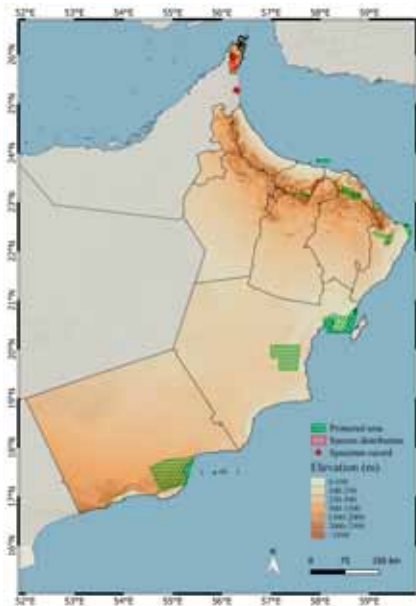

*Asaccus margaritae*

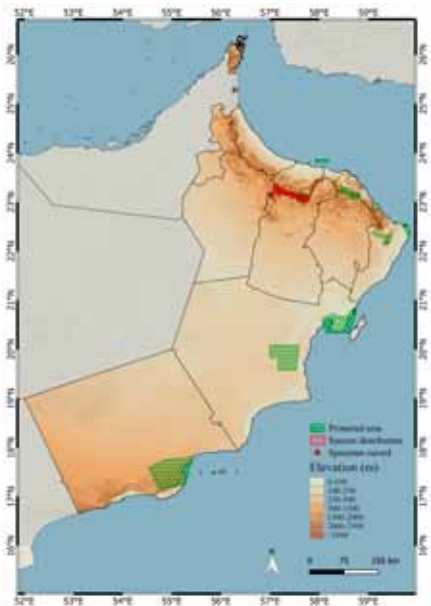

*Asaccus montanus*

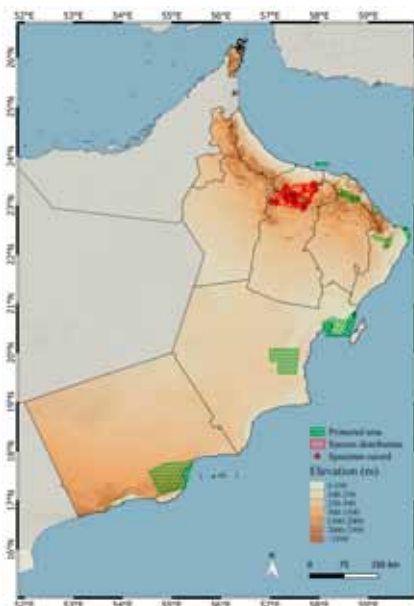

*Asaccus platyrhynchus*

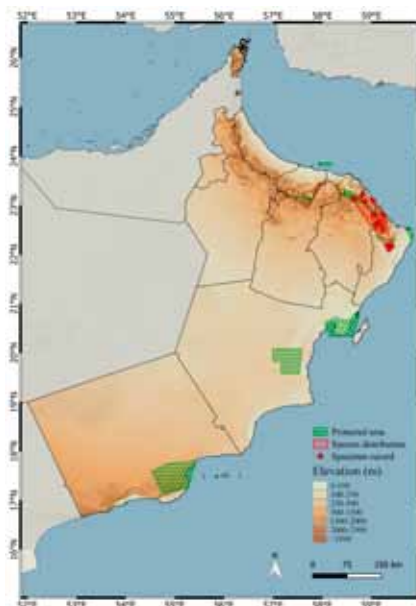

*Asaccus arnoldi*

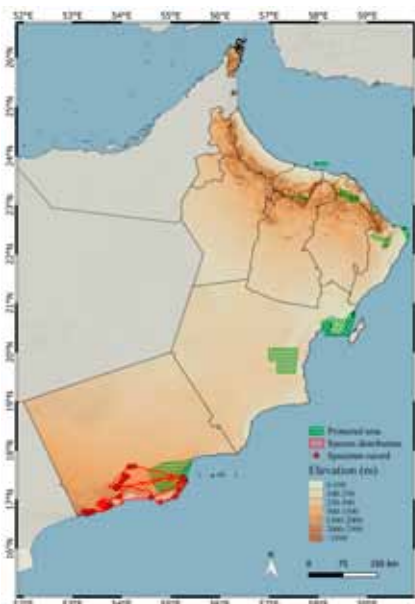

*Ptyodactylus dhofarensis*

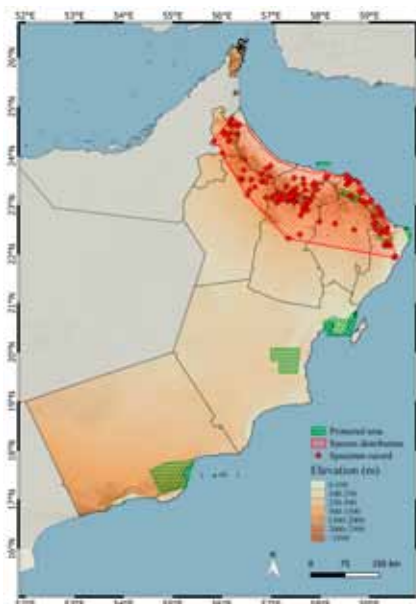

*Ptyodactylus orlovi*

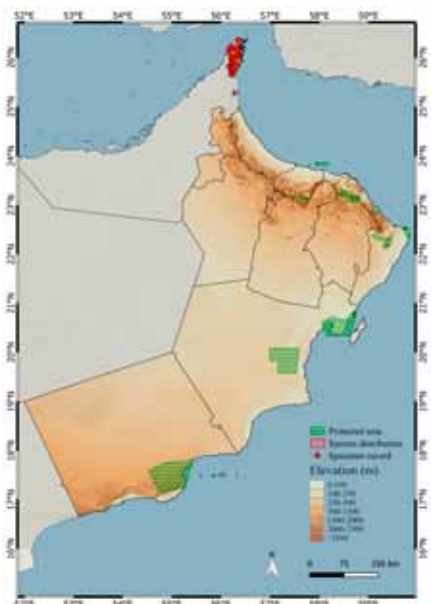

*Ptyodactylus ruusaljibalicus*

## S128: Maps of species' distribution defined using minimum convex polygons

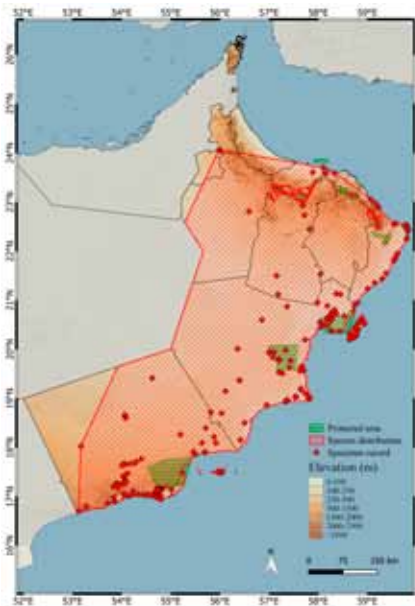*Pristurus carteri*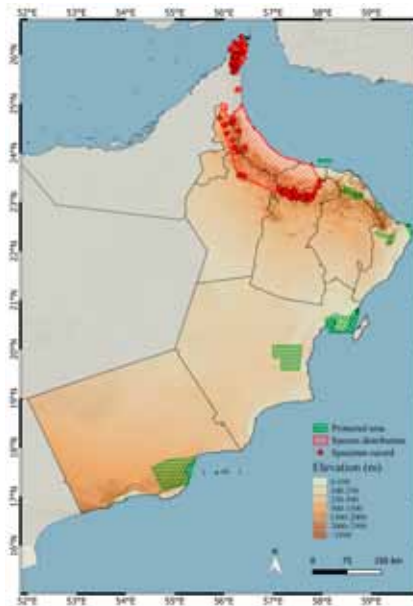*Pristurus celerrimus*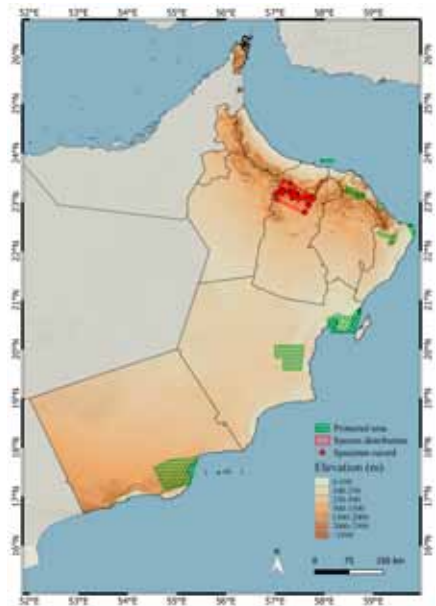*Pristurus gallagheri*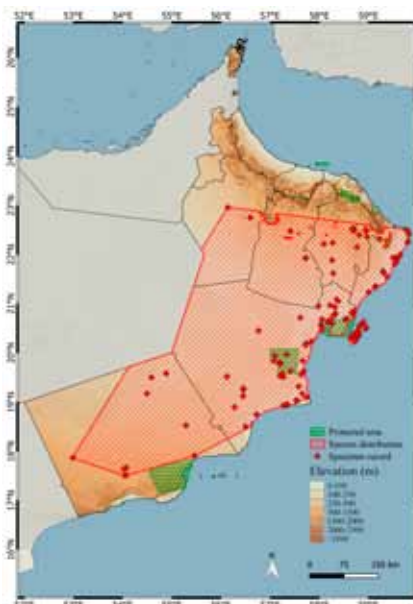*Pristurus minimus*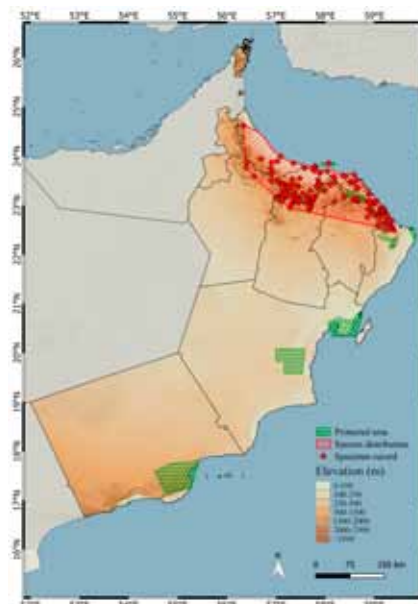*Pristurus rupestris rupestris*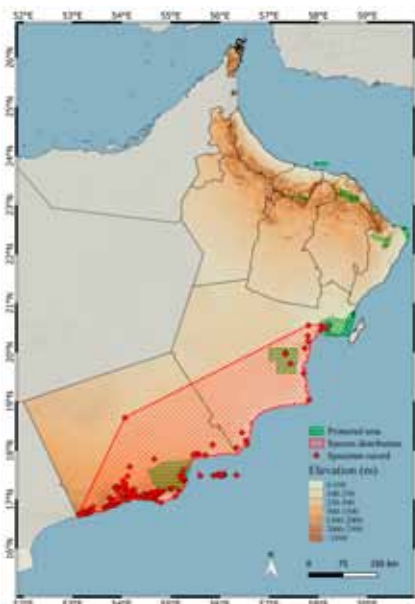*Pristurus sp. 1*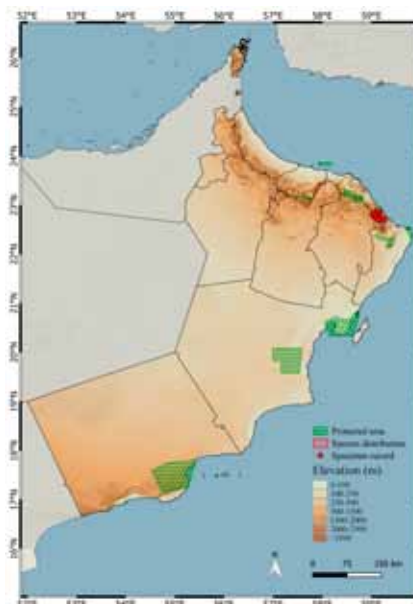*Pristurus sp. 2*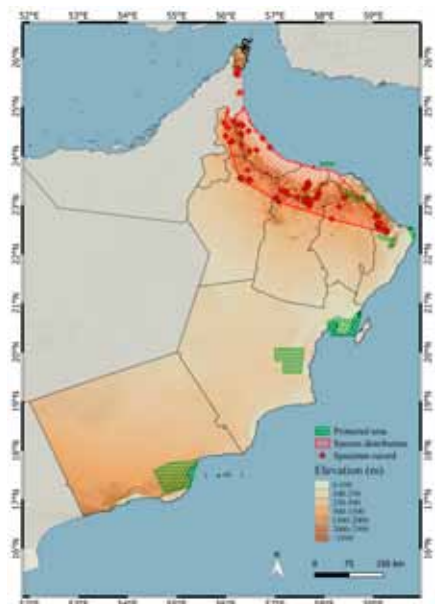*Pristurus sp. 3*

**S129: Maps of species' distribution defined using minimum convex polygons**

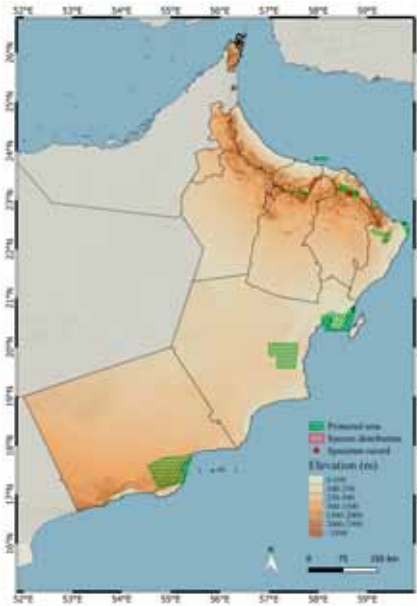

*Pristurus* sp. 4

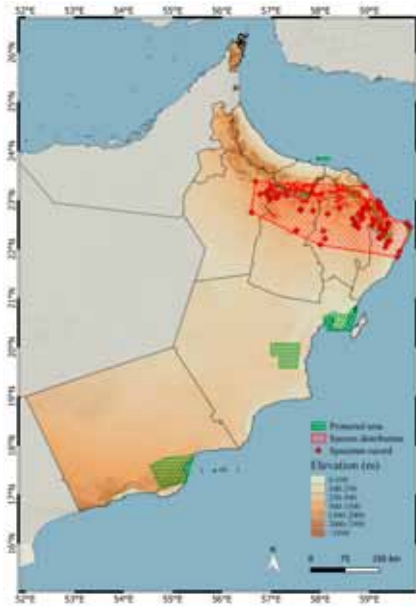

*Pristurus* sp. 5

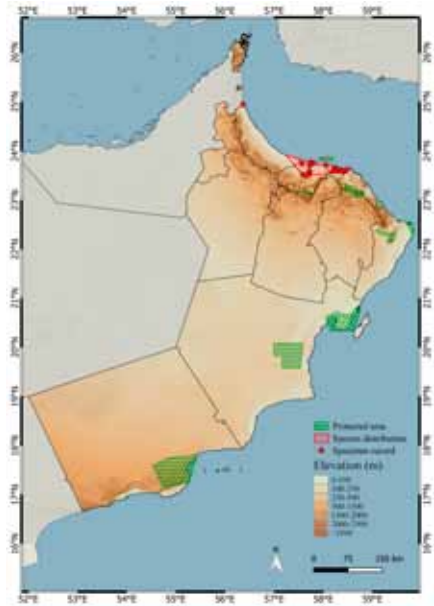

*Acanthodactylus blanfordii*

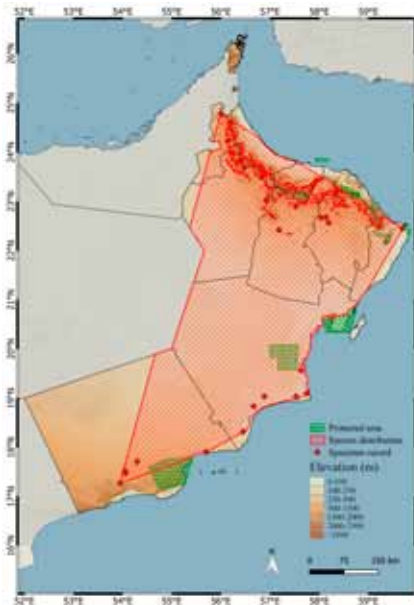

*Acanthodactylus boskianus*

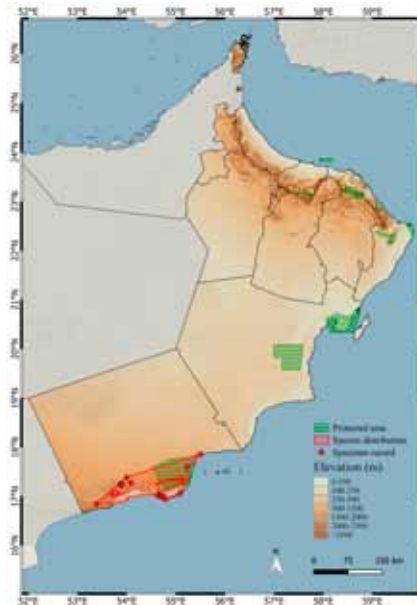

*Acanthodactylus felicis*

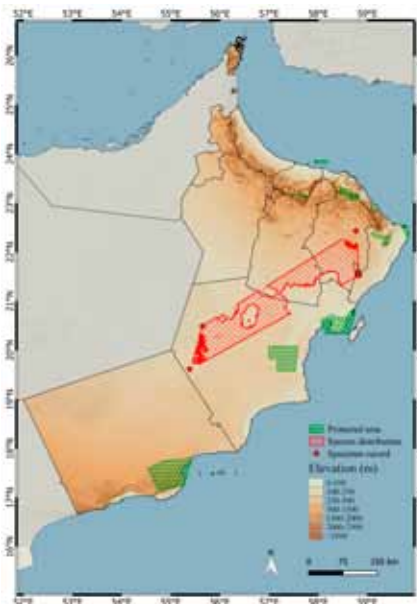

*Acanthodactylus haasi*

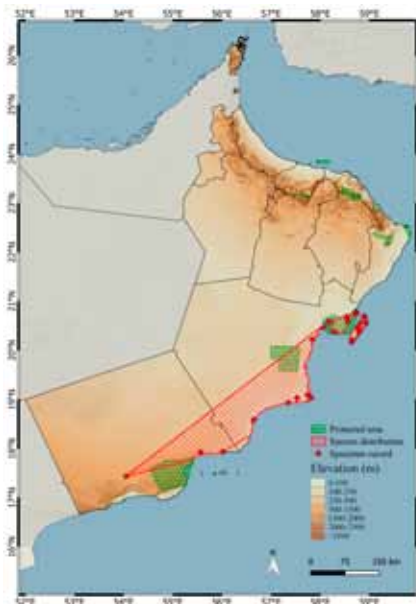

*Acanthodactylus masirae*

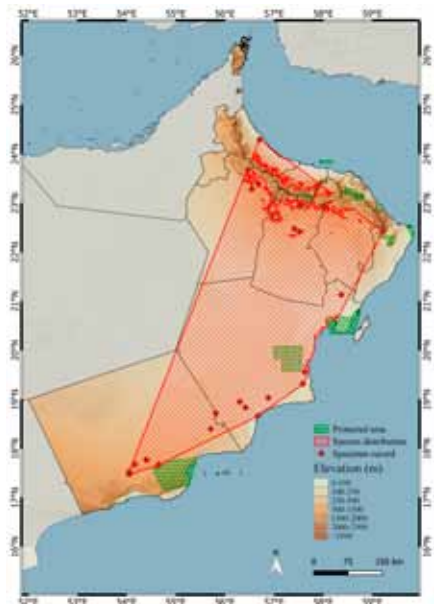

*Acanthodactylus ophiodurus*

## S130: Maps of species' distribution defined using minimum convex polygons

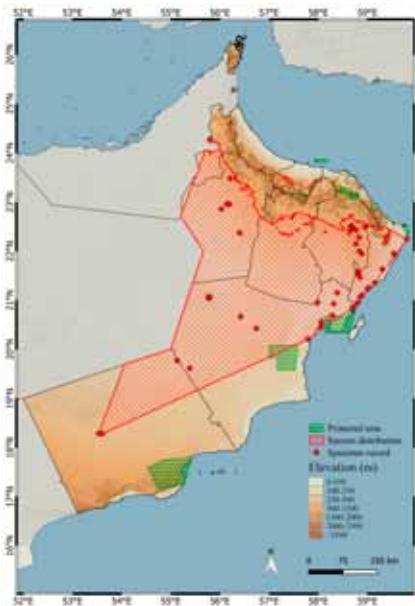*Acanthodactylus schmidti*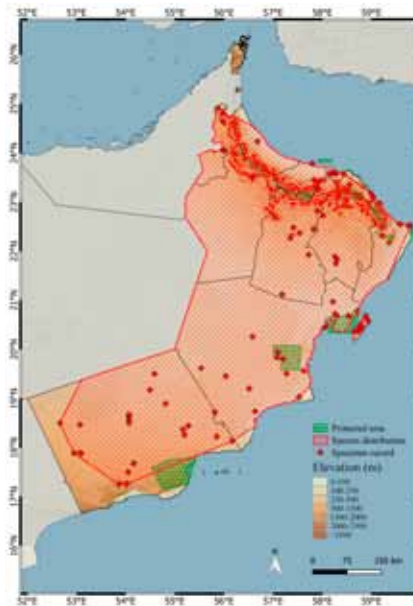*Mesalina adramitana*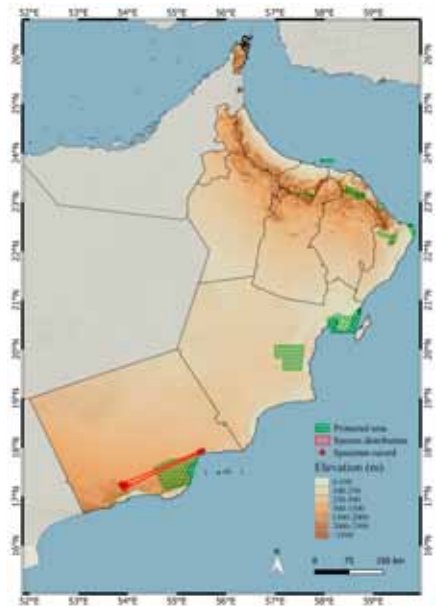*Mesalina ayunensis*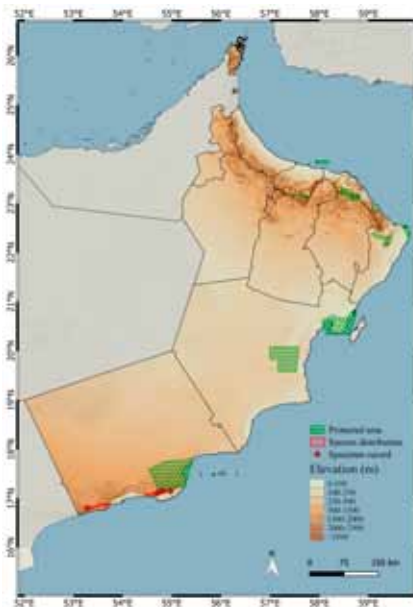*Mesalina sp. 1*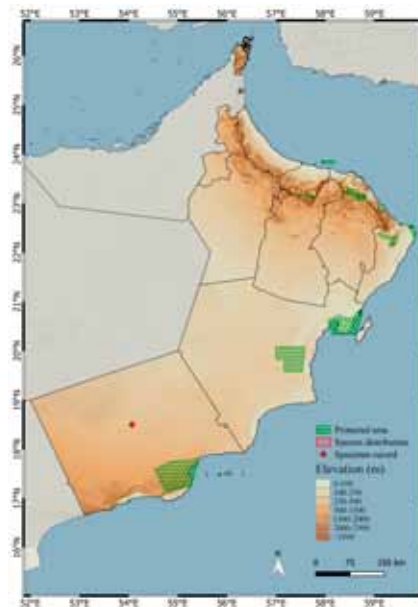*Mesalina sp. 2*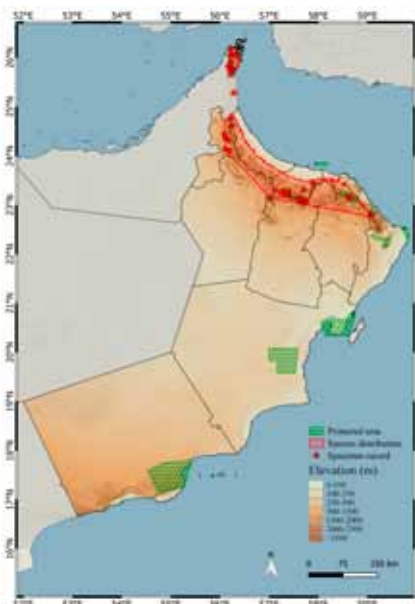*Omanosaura cyanura*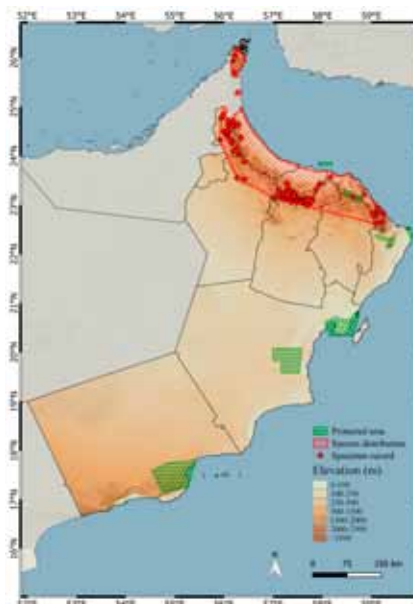*Omanosaura jayakari*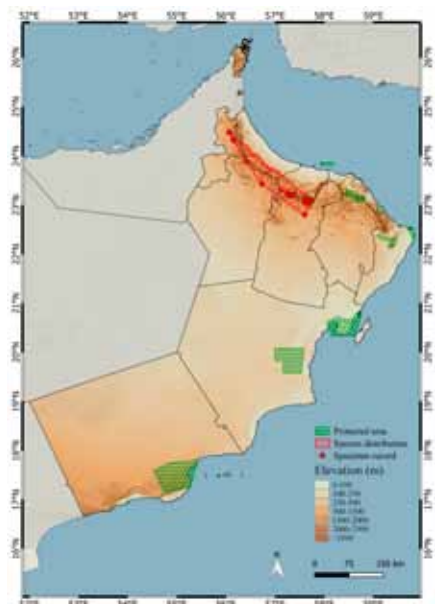*Ablepharus pannonicus*

**S131: Maps of species' distribution defined using minimum convex polygons**

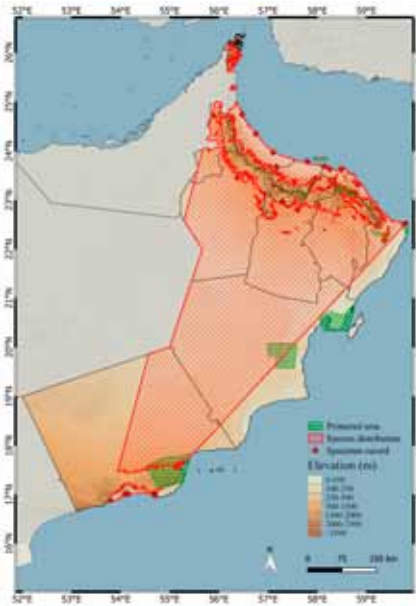

*Chalcides ocellatus ocellatus*

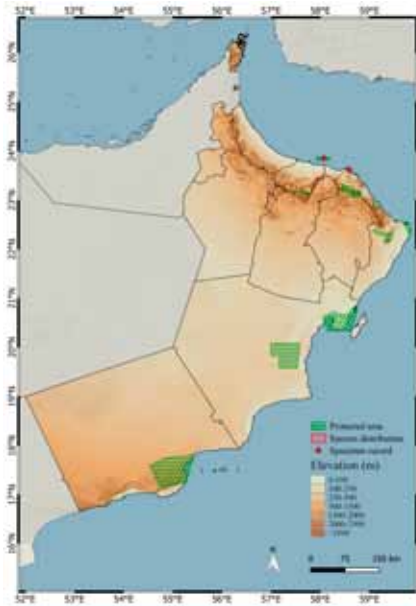

*Heremites septemtaeniatus*

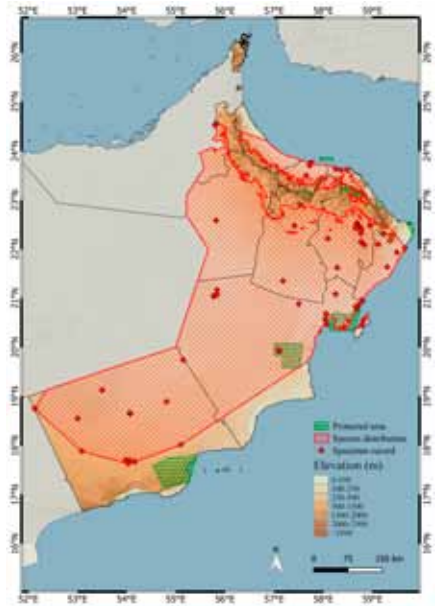

*Scincus mitranus*

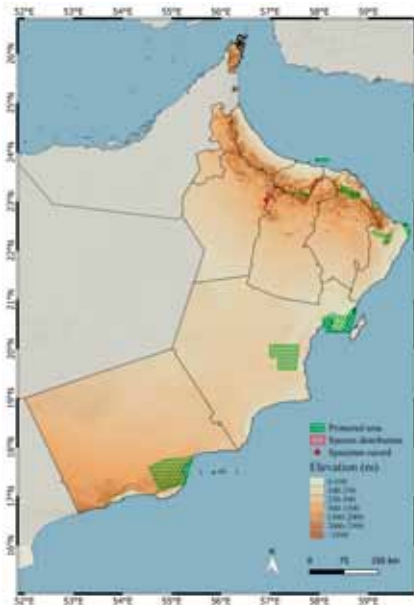

*Scincus scincus conirostris*

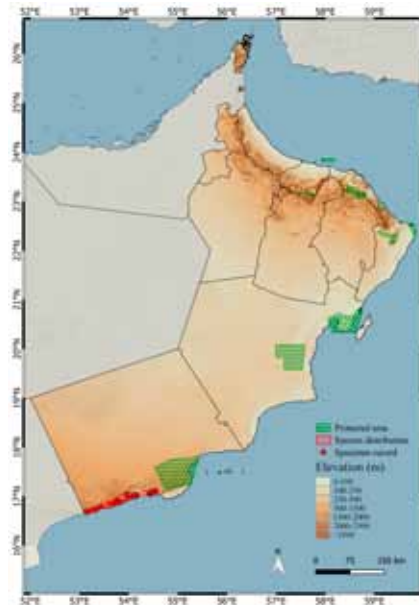

*Trachylepis brevicollis*

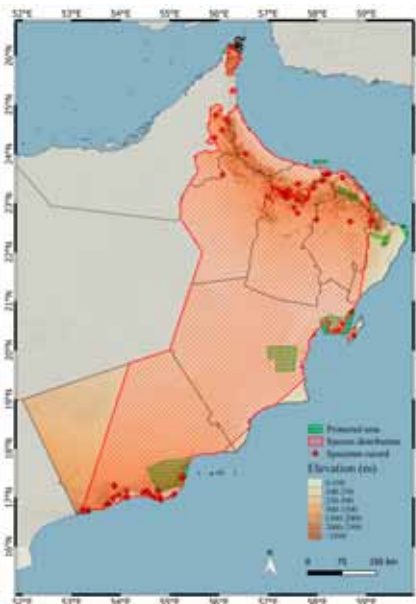

*Trachylepis tessellata*

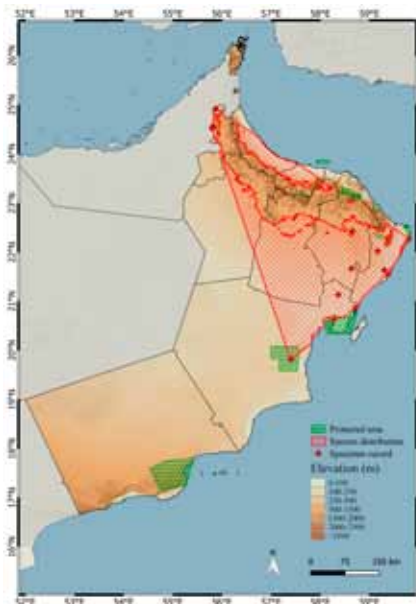

*Diplometopon zarudnyi*

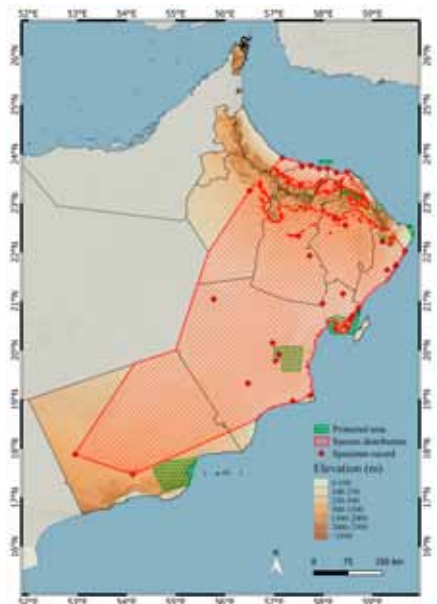

*Varanus griseus*



## S132: Maps of species' distribution defined using minimum convex polygons

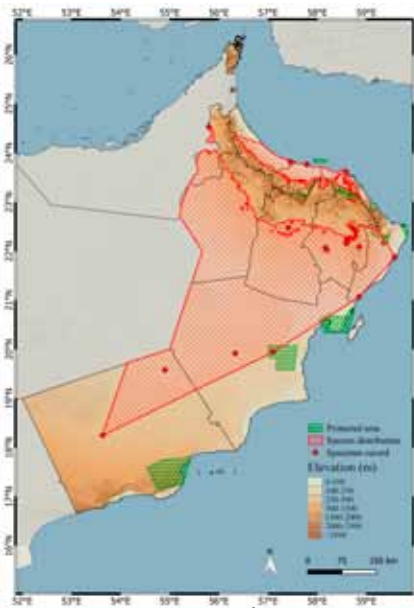*Eryx jayakari*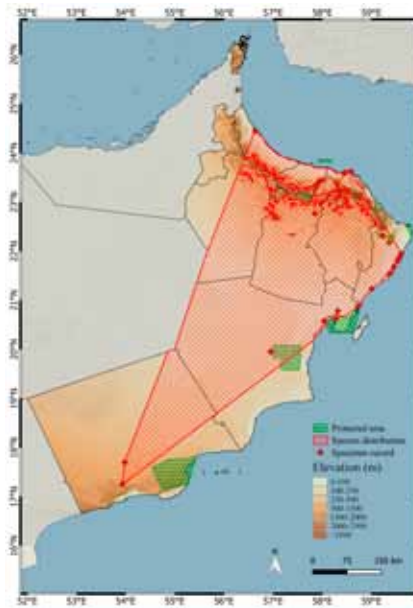*Lytorhynchus diadema diadema*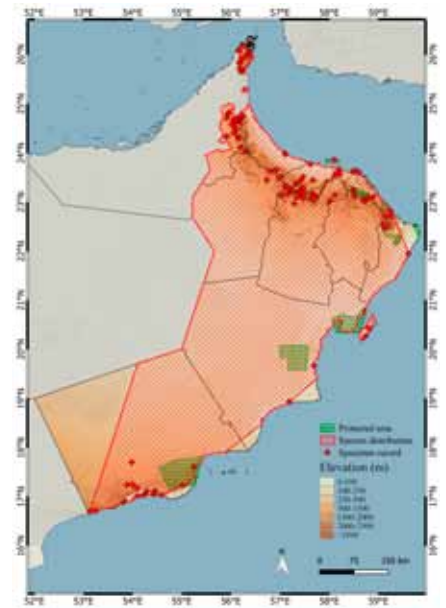*Platyceps rhodorachis rhodorachis*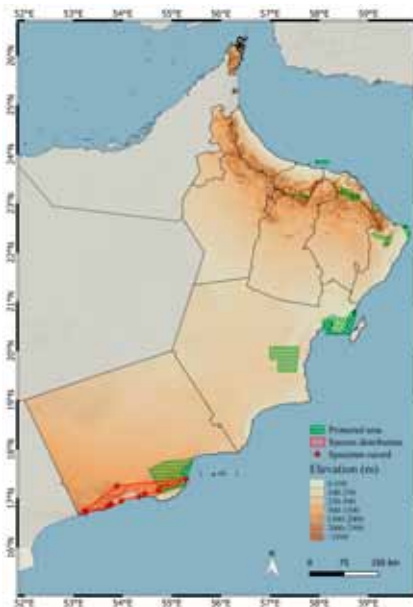*Platyceps thomasi*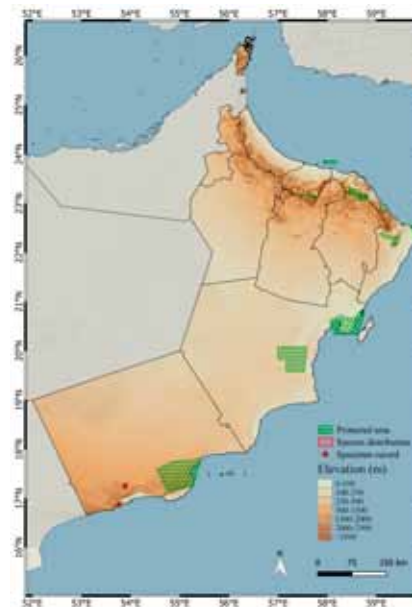*Rhynchocalamus arabicus*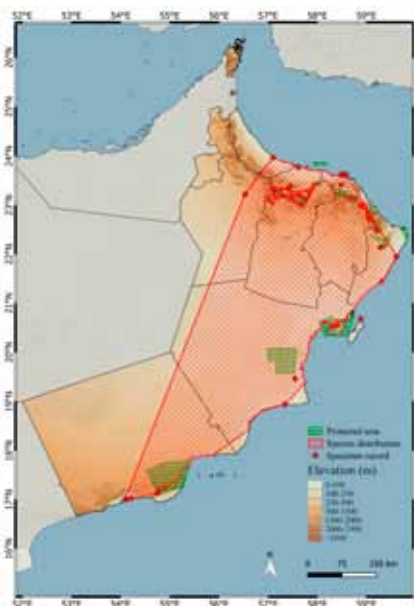*Spalerosophis diadema cliffordii*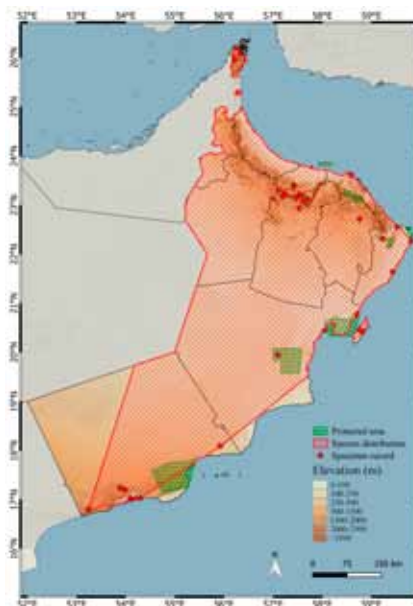*Telescopus dhara dhara*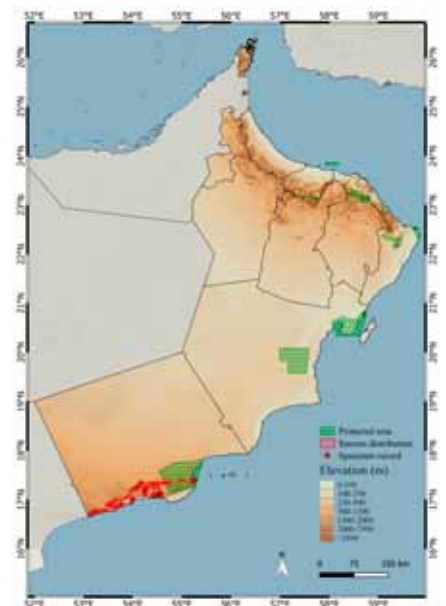*Naja arabica*

**S133: Maps of species' distribution defined using minimum convex polygons**

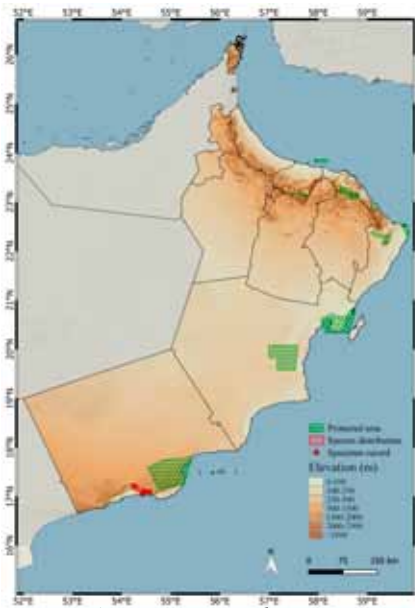

*Atractaspis andersonii*

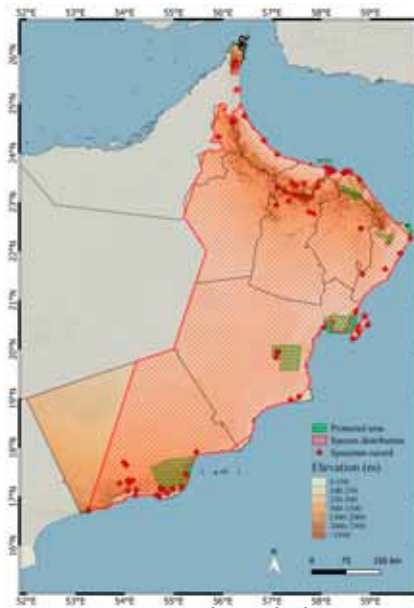

*Psammophis schokari*

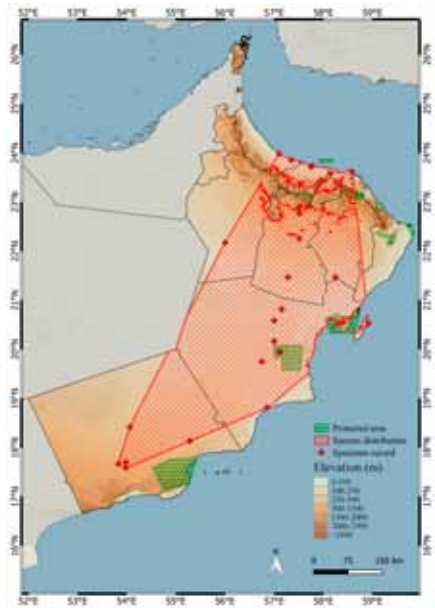

*Rhagerhis moilensis*

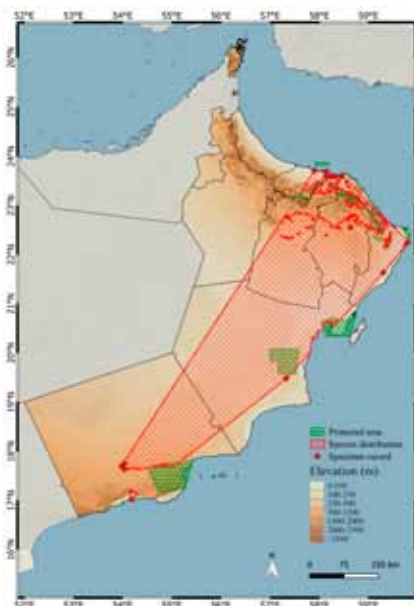

*Myriopholis macrorhyncha*

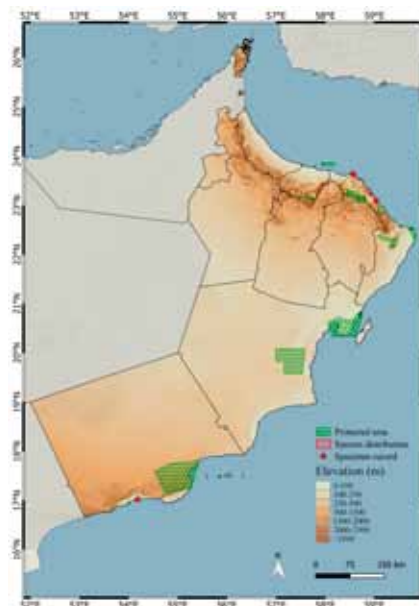

*Myriopholis nursii*

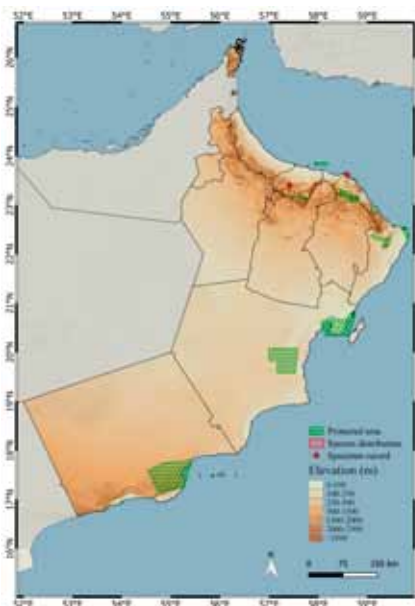

*Indotyphlops braminus*

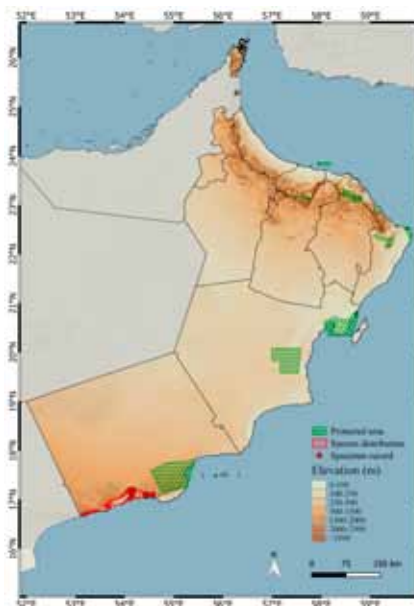

*Bitis arietans*

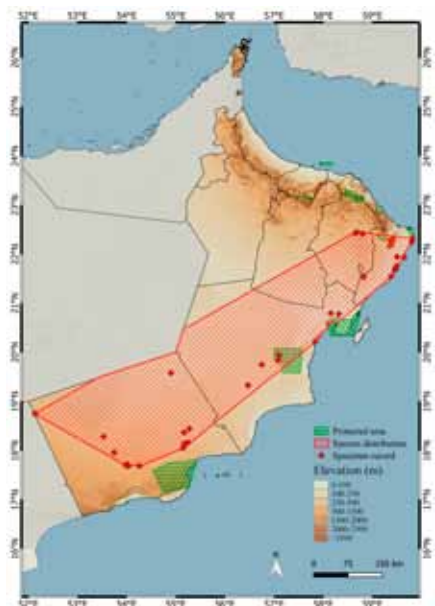

*Cerastes gasperettii gasperettii*

## S134: Maps of species' distribution defined using minimum convex polygons

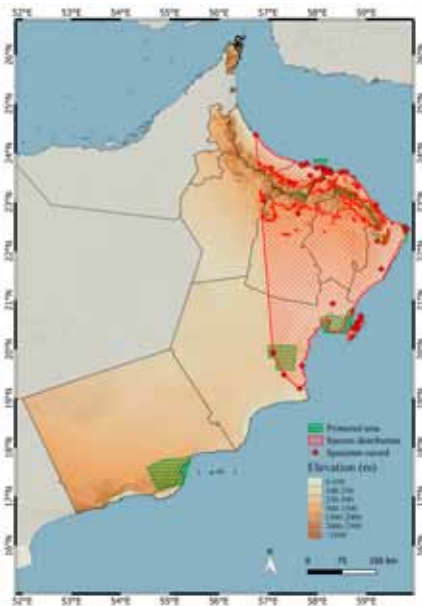*Echis carinatus sochureki*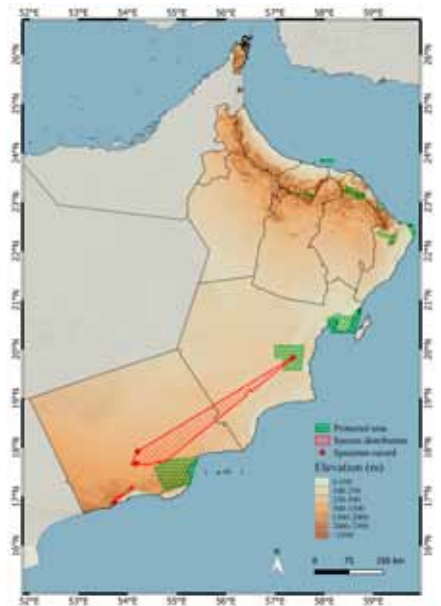*Echis coloratus*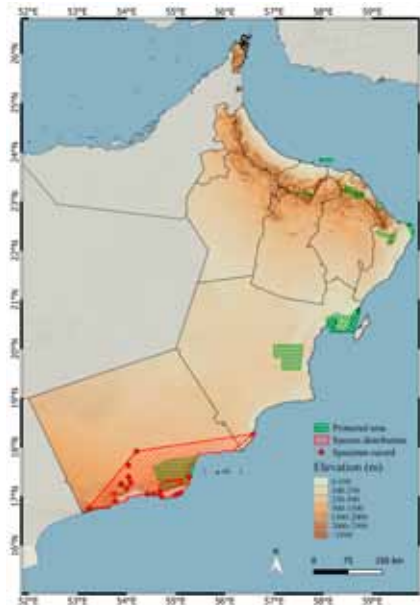*Echis khosatzkii*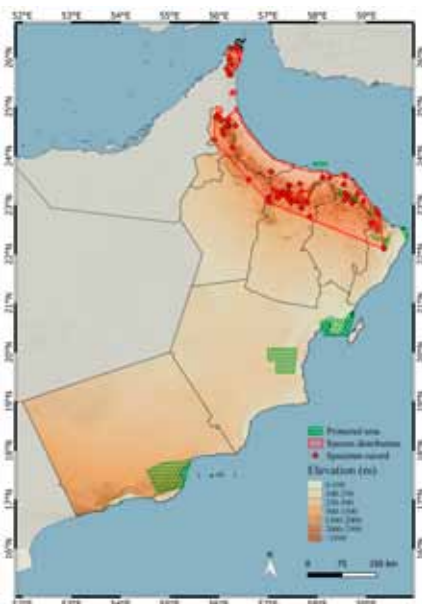*Echis omanensis*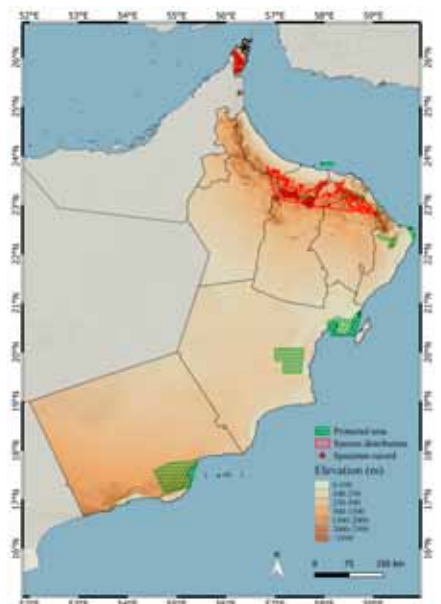*Pseudocerastes persicus*



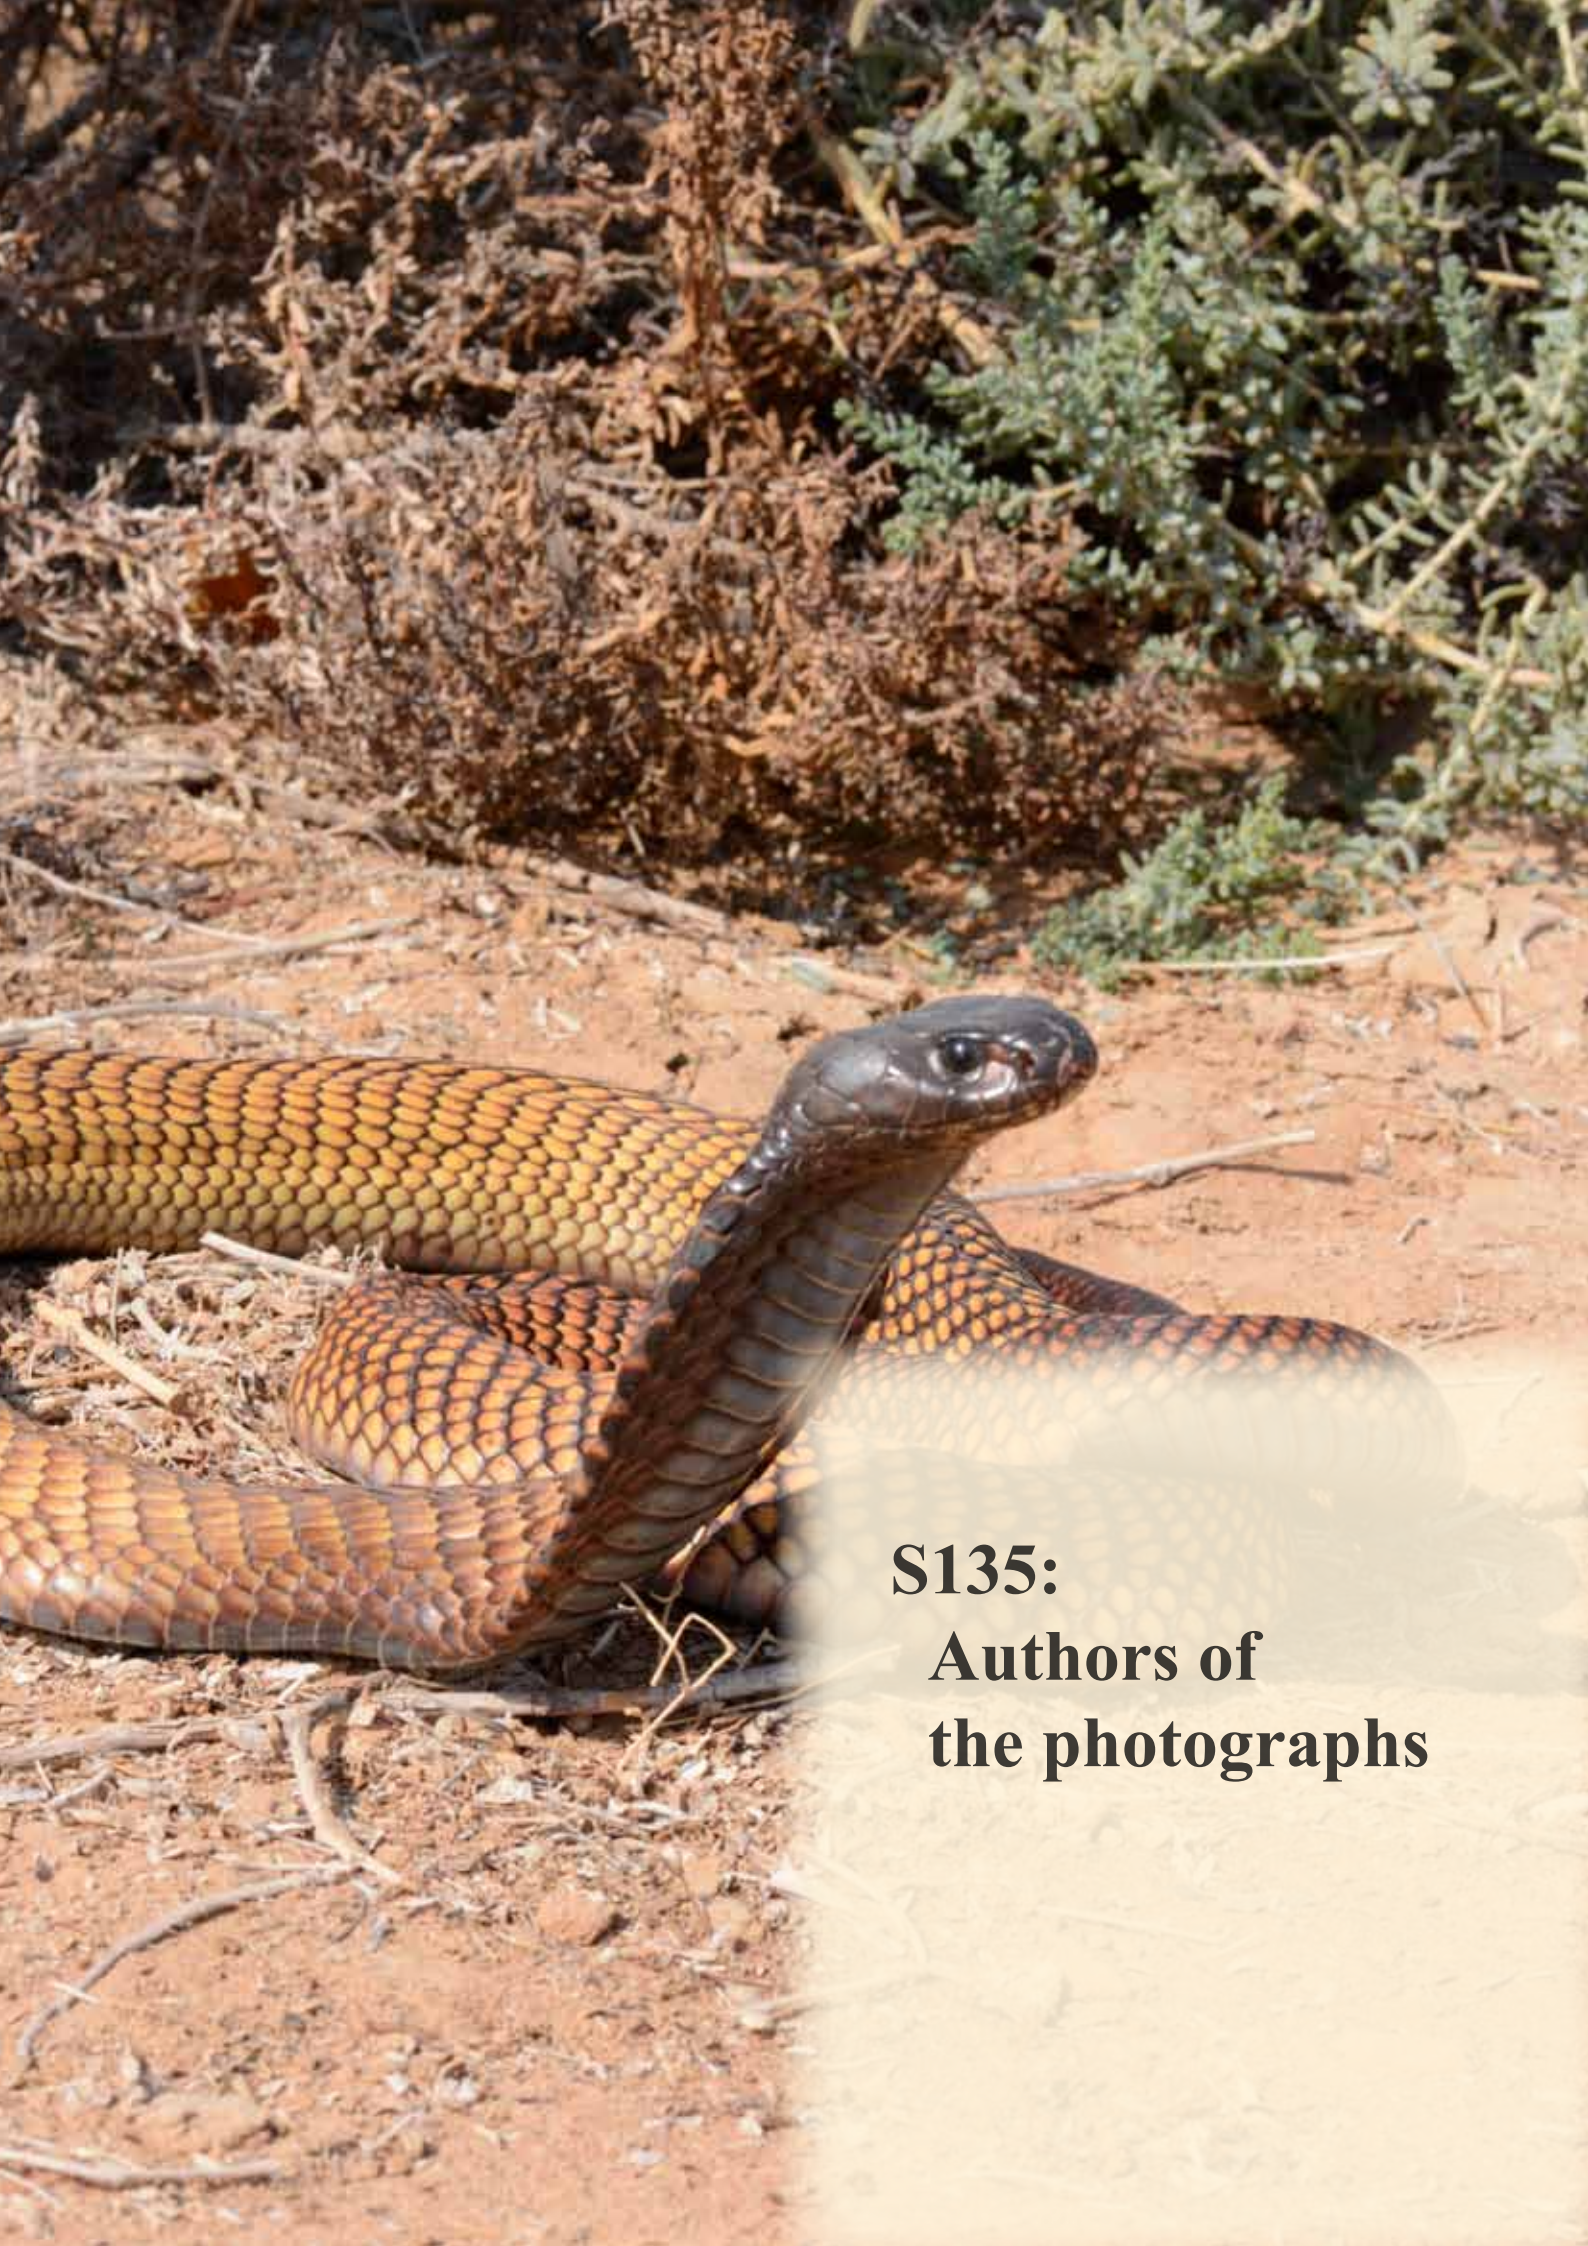

**S135:**  
**Authors of**  
**the photographs**

## S135: Authors of the photographs

Authors list of photograph with the page, and species' photos between contents.

**Amat, Fèlix (9):** pg 14, pg 15, pg 17, pg 32, pg 48, pg 49, pg 55, pg 56 , pg 59.

**Carranza, Salvador (47):** pg 10, pg 21, pg 22, pg 24, pg 25, pg 26, pg 28, pg 29, pg 30, pg 34, pg 35, pg 36, pg 37, pg 41, pg 42, pg 43, pg 44, pg 50, pg 51, pg 52, pg 53, pg 54, pg 57, pg 58, pg 60, pg 61, pg 62, pg 63, pg 64, pg 65, pg 66, pg 69, pg 71, pg 73, pg 87, pg 88, pg 89, pg 90, pg 92, pg 98, pg 100, pg 103, pg 104, pg 105, pg 107, pg 108, pg 109.

**Donaire, David (1):** pg 80.

**Els, Johannes (4):** pg 11, pg 94, pg 96, pg 99.

**Frenández, Daniel (8):** pg 27, pg 45, pg 67, pg 72, pg 74, pg 79, pg 91, pg 97.

**Gardner, Andrew (2):** pg 23, pg70.

**Gebhart, Jürgen (5):** pg 19, pg 68, pg 81, pg 86, pg 101.

**Gower, David (1):** pg 77.

**Martínez, Gabriel (2):** pg 38, pg 93.

**Mazuch, Tomas (2):** pg 20, pg 106.

**Mozaffari, Omid (1):** pg 82.

**Pierson, Todd (1):** pg 102.

**Pyron, Alex (1):** pg 31.

**Sampiano, Filipa (1):** pg 77.

**Sindaco, Roberto (12):** pg 9, pg 12, pg 33, pg 39, pg 40, pg 46, pg 47, pg 76, pg 78, pg 83, pg 85, pg 95.

**Šmíd, Jiri (5):** pg 13, pg 16, pg 18, pg 75, pg 84.

**Cover page:** *Asaccus arnoldi* (Carranza, Salvador)

**Pg 7:** *Trapelus flavimaculatus* (Šmíd, Jiri)

**Pg 111:** *Ptyodactylus dhofarensis* (Carranza, Salvador)

**Pg 115:** *Asaccus platyrhynchus* (Carranza, Salvador)

**Pg 133:** *Hemidactylus lemurinus* (Carranza, Salvador)

**Pg 141:** *Chamaeleo arabicus* (Carranza, Salvador)

**Pg 157:** *Naja arabica* (Gebhart, Jürgen)
